# Supplementary material for: Sex Differences in Gene and Protein Expression After Intracerebral Hemorrhage in Mice
Source: Springer Nature journal article supplement (doi:10.1007/s12975-018-0633-z), 2018-05-13
Supplement: MOESM3 [file 15760260]

## Sheet: F2hFBS
Log Ratio	Intensity/RPKM/FPKM	p-value	ID	Notes	Symbol	Entrez Gene Name	Location	Type(s)	Drug(s)
4.263	11.727	4.65e-08	1428361_x_at	D	HBA1/HBA2	hemoglobin, alpha 1	Extracellular Space	transporter	iron dextran, mefloquine
4.09	11.271	1.9e-09	1417184_s_at		Hbb-b2	hemoglobin, beta adult minor chain	Other	other
0.946	6.087	4.64e-07	1419004_s_at		BCL2A1	BCL2-related protein A1	Cytoplasm	other
0.493	6.595	9.56e-06	1449399_a_at		IL1B	interleukin 1, beta	Extracellular Space	cytokine	canakinumab, gevokizumab, canakinumab/INS, gallium nitrate
-0.564	9.023	3.87e-06	1427371_at		Abca8a	ATP-binding cassette, sub-family A (ABC1), member 8a	Other	transporter

## Sheet: F6hFBS
Log Ratio	Intensity/RPKM/FPKM	p-value	ID	Notes	Symbol	Entrez Gene Name	Location	Type(s)	Drug(s)
4.074	11.401	1.01e-07	1452757_s_at	D	HBA1/HBA2	hemoglobin, alpha 1	Extracellular Space	transporter	iron dextran, mefloquine
3.797	11.173	2.55e-09	1417184_s_at		Hbb-b2	hemoglobin, beta adult minor chain	Other	other
2.494	8.049	1.83e-09	1419282_at		CCL2	chemokine (C-C motif) ligand 2	Extracellular Space	cytokine	mimosine
2.078	7.537	5.18e-05	1455899_x_at	D	SOCS3	suppressor of cytokine signaling 3	Cytoplasm	phosphatase
1.533	7.475	1.49e-07	1435906_x_at		GBP2	guanylate binding protein 2, interferon-inducible	Cytoplasm	enzyme
1.34	7.578	1.63e-05	1418674_at		OSMR	oncostatin M receptor	Plasma Membrane	transmembrane receptor
1.297	7.653	4.15e-05	1452519_a_at		ZFP36	ZFP36 ring finger protein	Nucleus	transcription regulator
1.264	8.474	0.000128	1423233_at		CEBPD	CCAAT/enhancer binding protein (C/EBP), delta	Nucleus	transcription regulator
1.177	6.823	2.36e-07	1449399_a_at		IL1B	interleukin 1, beta	Extracellular Space	cytokine	canakinumab, gevokizumab, canakinumab/INS, gallium nitrate
1.151	8.027	6.78e-06	1417483_at		NFKBIZ	nuclear factor of kappa light polypeptide gene enhancer in B-cells inhibitor, zeta	Nucleus	transcription regulator
1.088	6.262	1.34e-07	1421009_at		RSAD2	radical S-adenosyl methionine domain containing 2	Cytoplasm	enzyme
1.051	7.82	8.77e-06	1450783_at		IFIT1B	interferon-induced protein with tetratricopeptide repeats 1B	Cytoplasm	other
1.011	6.007	1.61e-07	1438855_x_at		TNFAIP2	tumor necrosis factor, alpha-induced protein 2	Extracellular Space	other
1	11.767	2.22e-07	1426758_s_at	D	Meg3	maternally expressed 3	Other	other
0.996	7.91	2.96e-05	1449009_at		Tgtp1/Tgtp2	T cell specific GTPase 1	Other	enzyme
0.97	8.126	0.000519	1447537_at		1500032P08Rik	RIKEN cDNA 1500032P08 gene	Other	other
0.946	7.251	3.92e-06	1418599_at	D	COL11A1	collagen, type XI, alpha 1	Extracellular Space	other	collagenase clostridium histolyticum
0.929	10.815	3.79e-07	1460121_at		9630010G10Rik	RIKEN cDNA 9630010G10 gene	Other	other
0.923	6.294	3.64e-07	1419132_at		TLR2	toll-like receptor 2	Plasma Membrane	transmembrane receptor
0.897	8.016	0.000814	1416811_s_at	D	Ctla2a/Ctla2b	cytotoxic T lymphocyte-associated protein 2 alpha	Plasma Membrane	other
0.89	10.908	1.32e-05	1422850_at	D	PABPN1	poly(A) binding protein, nuclear 1	Nucleus	enzyme
0.884	7.598	3.82e-06	1417936_at		Ccl9	chemokine (C-C motif) ligand 9	Extracellular Space	cytokine
0.88	9.559	0.000425	1455831_at		Fus	fused in sarcoma	Nucleus	other
0.838	6.987	0.000271	1419043_a_at	D	Iigp1	interferon inducible GTPase 1	Other	enzyme
0.824	6.42	9.63e-06	1442700_at		PDE4B	phosphodiesterase 4B, cAMP-specific	Cytoplasm	enzyme	enprofylline, dyphylline, nitroglycerin, caffeine/ergotamine, arofylline, tetomilast, L 869298, ibudilast, aminophylline, anagrelide, cilomilast, milrinone, dipyridamole, L-826,141, ketotifen, roflumilast, tolbutamide, papaverine, theophylline, pentoxifylline, caffeine
0.813	8.888	7.08e-06	1419647_a_at		IER3	immediate early response 3	Cytoplasm	other
0.809	7.69	3.53e-07	1436277_at		RNF207	ring finger protein 207	Other	other
0.796	8.452	2.67e-07	1441855_x_at		CXCL2	chemokine (C-X-C motif) ligand 2	Extracellular Space	cytokine
0.782	11.286	1.15e-06	1437311_at	D	Snhg11	small nucleolar RNA host gene 11	Other	other
0.778	6.992	6.41e-07	1423760_at	D	CD44	CD44 molecule (Indian blood group)	Plasma Membrane	enzyme
0.747	7.45	5.58e-05	1442421_at	D	Srrm3	serine/arginine repetitive matrix 3	Other	other
0.724	9.936	1.3e-06	1428083_at		Neat1	nuclear paraspeckle assembly transcript 1 (non-protein coding)	Nucleus	other
0.719	5.609	0.000742	1442849_at		LRP1	low density lipoprotein receptor-related protein 1	Plasma Membrane	transmembrane receptor
0.701	7.678	0.000116	1443369_at	D	VWA5B2	von Willebrand factor A domain containing 5B2	Other	other
0.695	8.295	5.93e-07	1417495_x_at	D	CP	ceruloplasmin (ferroxidase)	Extracellular Space	enzyme
0.687	10.031	0.000394	1435453_at		A930011O12Rik	RIKEN cDNA A930011O12 gene	Other	other
0.683	8.875	4.6e-05	1424254_at		Ifitm1	interferon induced transmembrane protein 1	Other	other
0.675	9.606	1.19e-06	1428259_at		PXDN	peroxidasin homolog (Drosophila)	Extracellular Space	enzyme
0.675	8.45	7.44e-06	1433699_at		TNFAIP3	tumor necrosis factor, alpha-induced protein 3	Nucleus	enzyme
0.674	9.462	6.45e-06	1420048_at		C78859	expressed sequence C78859	Other	other
0.671	7.923	1.95e-06	1418580_at		RTP4	receptor (chemosensory) transporter protein 4	Plasma Membrane	other
0.664	7.177	9.89e-05	1456771_at		ZER1	zyg-11 related, cell cycle regulator	Other	enzyme
0.663	8.707	0.00132	1440001_at		Rian	RNA imprinted and accumulated in nucleus	Nucleus	other
0.657	8.206	4.28e-06	1429469_at		A930013F10Rik	RIKEN cDNA A930013F10 gene	Other	other
0.657	7.377	8.22e-06	1448239_at		HMOX1	heme oxygenase (decycling) 1	Cytoplasm	enzyme	tin mesoporphyrin
0.65	9.441	1.73e-08	1429009_at	D	SNRNP70	small nuclear ribonucleoprotein 70kDa (U1)	Nucleus	other
0.646	7.648	0.000403	1457673_at	D	2610005L07Rik	cadherin 11 pseudogene	Other	other
0.64	9.158	0.00181	1460033_at		A330023F24Rik	RIKEN cDNA A330023F24 gene	Other	other
0.64	7.658	0.00239	1438130_at	D	TAF15	TAF15 RNA polymerase II, TATA box binding protein (TBP)-associated factor, 68kDa	Nucleus	other
0.636	10.557	0.00013	1419706_a_at		AKAP12	A kinase (PRKA) anchor protein 12	Cytoplasm	transporter
0.631	6.493	0.0012	1435934_at		NDUFAB1	NADH dehydrogenase (ubiquinone) 1, alpha/beta subcomplex, 1, 8kDa	Cytoplasm	enzyme
0.629	10.101	7.11e-05	1437862_at	D	Rbm25	RNA binding motif protein 25	Nucleus	other
0.628	7.985	0.000126	1438496_a_at	D	DDX26B	DEAD/H (Asp-Glu-Ala-Asp/His) box polypeptide 26B	Other	other
0.627	10.113	2.93e-05	1436766_at	D	LUC7L2	LUC7-like 2 (S. cerevisiae)	Other	other
0.626	7.82	0.000777	1429900_at		5330406M23Rik	RIKEN cDNA 5330406M23 gene	Other	other
0.626	10.455	1.68e-05	1455325_at		Miat	myocardial infarction associated transcript (non-protein coding)	Nucleus	other
0.616	10.261	7.98e-06	1452378_at	D	MALAT1	metastasis associated lung adenocarcinoma transcript 1 (non-protein coding)	Nucleus	other
0.616	7.766	3.57e-06	1437638_at	D	Srrm2	serine/arginine repetitive matrix 2	Nucleus	other
0.615	6.886	0.000889	1439276_at		ADAR	adenosine deaminase, RNA-specific	Nucleus	enzyme
0.614	6.307	3.02e-05	1418191_at		USP18	ubiquitin specific peptidase 18	Cytoplasm	peptidase
0.613	6.834	9.92e-07	1436140_at	D	DENND6B	DENN/MADD domain containing 6B	Other	other
0.61	7.867	1.25e-05	1421392_a_at		BIRC3	baculoviral IAP repeat containing 3	Cytoplasm	enzyme
0.61	8.663	7.06e-06	1437471_at		LRRC45	leucine rich repeat containing 45	Cytoplasm	other
0.609	10.056	3.85e-06	1423754_at		IFITM3	interferon induced transmembrane protein 3	Plasma Membrane	other
0.608	10.032	0.00126	1433830_at	D	HNRNPA2B1	heterogeneous nuclear ribonucleoprotein A2/B1	Nucleus	other
0.607	8.404	2.45e-07	1425245_a_at		RGS11	regulator of G-protein signaling 11	Plasma Membrane	enzyme
0.603	9.791	0.000876	1453399_at	D	CCNT2	cyclin T2	Nucleus	transcription regulator
0.601	5.973	1.46e-05	1419004_s_at		BCL2A1	BCL2-related protein A1	Cytoplasm	other
0.598	9.399	0.000336	1418901_at		CEBPB	CCAAT/enhancer binding protein (C/EBP), beta	Nucleus	transcription regulator
0.594	7.592	2.18e-05	1458617_at		ZMYND8	zinc finger, MYND-type containing 8	Nucleus	transcription regulator
0.592	6.327	0.000465	1443068_at		D130084N16Rik	RIKEN cDNA D130084N16 gene	Other	other
0.587	9.063	4.68e-07	1460220_a_at	D	CSF1	colony stimulating factor 1 (macrophage)	Extracellular Space	cytokine
0.582	8.905	7.75e-05	1443876_at		CAMK2A	calcium/calmodulin-dependent protein kinase II alpha	Cytoplasm	kinase
0.581	9.329	0.000833	1438838_at		Ftx	Ftx transcript, Xist regulator (non-protein coding)	Other	other
0.579	7.979	3.21e-06	1433757_a_at	D	Nisch	nischarin	Cytoplasm	other
0.574	9.805	1.93e-06	1454735_at		ODF2	outer dense fiber of sperm tails 2	Cytoplasm	other
0.573	7.155	0.00147	1438916_x_at	D	Firre	functional intergenic repeating RNA element	Other	other
0.572	7.72	0.000971	1438675_at	D	SFSWAP	splicing factor, suppressor of white-apricot family	Nucleus	other
0.57	8.9	0.000755	1436427_at	D	PRPF4B	pre-mRNA processing factor 4B	Nucleus	kinase
0.567	7.993	0.000259	1437543_at	D	FUBP1	far upstream element (FUSE) binding protein 1	Nucleus	transcription regulator
0.567	8.812	4.53e-06	1457030_at	D	Mirg	miRNA containing gene	Other	other
0.565	10.272	0.000631	1436898_at	D	SFPQ	splicing factor proline/glutamine-rich	Nucleus	other
0.562	5.798	3.18e-06	1438676_at		GBP6	guanylate binding protein family, member 6	Cytoplasm	enzyme
0.561	8.328	1.92e-05	1438249_at		USP7	ubiquitin specific peptidase 7 (herpes virus-associated)	Nucleus	peptidase
0.56	7.043	0.000219	1452521_a_at		PLAUR	plasminogen activator, urokinase receptor	Plasma Membrane	transmembrane receptor
0.559	8.088	0.00144	1437418_at		Gm3515	predicted gene 3515	Other	other
0.559	7.95	9.65e-06	1440619_at		MAPK8IP1	mitogen-activated protein kinase 8 interacting protein 1	Cytoplasm	other
0.557	8.577	9.76e-05	1453582_at	D	CHKA	choline kinase alpha	Cytoplasm	kinase
0.556	8.851	1.4e-06	1450688_at		RGL2	ral guanine nucleotide dissociation stimulator-like 2	Cytoplasm	other
0.555	7.28	0.000271	1426526_s_at		OVGP1	oviductal glycoprotein 1, 120kDa	Extracellular Space	enzyme
0.553	7.67	0.000312	1428781_at		DMKN	dermokine	Extracellular Space	other
0.553	9.28	9.13e-07	1450958_at		TM4SF1	transmembrane 4 L six family member 1	Plasma Membrane	other
0.546	5.966	0.00103	1441145_at		PHF21A	PHD finger protein 21A	Nucleus	other
0.545	8.12	0.000795	1440557_at		IPW	imprinted in Prader-Willi syndrome (non-protein coding)	Other	other
0.545	7.134	0.000595	1440728_at		KCNMA1	potassium large conductance calcium-activated channel, subfamily M, alpha member 1	Plasma Membrane	ion channel	tedisamil, cromolyn
0.536	7.243	0.000137	1417266_at		Ccl6	chemokine (C-C motif) ligand 6	Extracellular Space	cytokine
0.533	7.855	0.000195	1425362_at	D	AGFG2	ArfGAP with FG repeats 2	Other	other
0.532	9.07	5.07e-07	1424843_a_at	D	GAS5	growth arrest-specific 5 (non-protein coding)	Other	other
0.525	8.894	0.000178	1433428_x_at	D	TGM2	transglutaminase 2	Cytoplasm	enzyme
0.524	8.936	0.00197	1438429_at		2610319H10Rik	RIKEN cDNA 2610319H10 gene	Other	other
0.524	7.843	0.00133	1457266_at		SLC38A6	solute carrier family 38, member 6	Other	transporter
0.522	8.286	7.11e-06	1437566_at		GNL2	guanine nucleotide binding protein-like 2 (nucleolar)	Nucleus	enzyme
0.522	6.136	0.000162	1447901_x_at		SFI1	Sfi1 homolog, spindle assembly associated (yeast)	Cytoplasm	other
0.517	8.068	0.000761	1434719_at		A2M	alpha-2-macroglobulin	Extracellular Space	transporter
0.514	7.047	0.000723	1457712_at		CHD8	chromodomain helicase DNA binding protein 8	Nucleus	enzyme
0.513	6.779	1.44e-05	1442108_at		RNF25	ring finger protein 25	Nucleus	transcription regulator
0.512	8.442	6.43e-05	1456260_at		RBBP4	retinoblastoma binding protein 4	Nucleus	enzyme
0.512	7.035	0.00181	1457292_at	D	TAF1D	TATA box binding protein (TBP)-associated factor, RNA polymerase I, D, 41kDa	Nucleus	other
0.509	6.868	0.00295	1439342_at		CLPX	caseinolytic mitochondrial matrix peptidase chaperone subunit	Cytoplasm	enzyme
0.508	9.519	0.00162	1439972_at		ETNK1	ethanolamine kinase 1	Cytoplasm	kinase
0.508	9.298	0.000598	1436996_x_at	D	LYZ	lysozyme	Extracellular Space	enzyme
0.508	6.843	0.000927	1440846_at		SCAI	suppressor of cancer cell invasion	Other	transcription regulator
0.507	8.258	9.09e-06	1437700_at		SCHIP1	schwannomin interacting protein 1	Cytoplasm	other
0.503	7.248	0.000502	1444656_at	D	SGK494	uncharacterized serine/threonine-protein kinase SgK494	Other	kinase
0.502	6.745	0.000178	1429694_at		C20orf194	chromosome 20 open reading frame 194	Nucleus	other
0.501	8.462	0.000169	1448436_a_at		IRF1	interferon regulatory factor 1	Nucleus	transcription regulator
0.501	7.501	3.95e-05	1458208_s_at		MCCC1	methylcrotonoyl-CoA carboxylase 1 (alpha)	Cytoplasm	enzyme
0.498	6.795	0.000789	1459879_at	D	KIAA0430	KIAA0430	Cytoplasm	other
0.497	8.572	0.00144	1437892_at		ZKSCAN3	zinc finger with KRAB and SCAN domains 3	Nucleus	transcription regulator
0.492	9.145	0.000916	1458584_at		4832406H04Rik	RIKEN cDNA 4832406H04 gene	Other	other
0.49	8.169	0.000523	1437660_at	D	NKTR	natural killer cell triggering receptor	Plasma Membrane	other
0.486	8.572	2.62e-06	1448590_at		COL6A1	collagen, type VI, alpha 1	Extracellular Space	other	collagenase clostridium histolyticum
0.483	8.404	8.97e-06	1417765_a_at		AMY2A	amylase, alpha 2A (pancreatic)	Extracellular Space	enzyme	ascorbic acid, acarbose
0.483	9.928	0.000832	1424609_a_at		CWC22	CWC22 spliceosome-associated protein homolog (S. cerevisiae)	Nucleus	other
0.481	8.166	3.29e-05	1444120_at		BIN1	bridging integrator 1	Nucleus	other
0.479	8.119	0.000268	1458386_at		C030009J22Rik	RIKEN cDNA C030009J22 gene	Other	other
0.477	7.438	0.000337	1457593_at		2610202C22Rik	RIKEN cDNA 2610202C22 gene	Other	other
0.475	8.451	7.69e-07	1425067_at		CELSR3	cadherin, EGF LAG seven-pass G-type receptor 3	Plasma Membrane	G-protein coupled receptor
0.473	7.526	0.00295	1416612_at		CYP1B1	cytochrome P450, family 1, subfamily B, polypeptide 1	Cytoplasm	enzyme
0.473	10.557	3.62e-05	1435080_x_at	D	PNISR	PNN-interacting serine/arginine-rich protein	Nucleus	other
0.473	8.894	3.15e-07	1425536_at		STX3	syntaxin 3	Plasma Membrane	transporter
0.47	8.547	6.7e-05	1456430_at	D	TTC14	tetratricopeptide repeat domain 14	Other	other
0.468	10.026	6.12e-06	1441625_at		RIMBP2	RIMS binding protein 2	Plasma Membrane	other
0.468	8.847	6.96e-06	1434031_at		ZNF692	zinc finger protein 692	Other	other
0.466	11.014	6.01e-06	1455771_at		BZRAP1	benzodiazepine receptor (peripheral) associated protein 1	Cytoplasm	other
0.466	4.834	0.000392	1438100_at		RABL6	RAB, member RAS oncogene family-like 6	Cytoplasm	other
0.466	8.015	0.000513	1460077_at		TTC3	tetratricopeptide repeat domain 3	Cytoplasm	enzyme
0.462	6.85	4.43e-06	1451860_a_at		Trim30a/Trim30d	tripartite motif-containing 30A	Cytoplasm	other
0.455	8.429	0.000277	1439173_at	D	HOOK1	hook microtubule-tethering protein 1	Cytoplasm	other
0.454	9.137	0.00045	1438299_at		9230108I15Rik	RIKEN cDNA 9230108I15 gene	Other	other
0.454	9.326	6.54e-05	1448110_at	D	SEMA4A	sema domain, immunoglobulin domain (Ig), transmembrane domain (TM) and short cytoplasmic domain, (semaphorin) 4A	Plasma Membrane	other
0.453	8.031	8.17e-05	1447806_s_at		SRPK3	SRSF protein kinase 3	Cytoplasm	kinase
0.451	7.906	2.11e-05	1436855_at		PTPRS	protein tyrosine phosphatase, receptor type, S	Plasma Membrane	phosphatase
0.45	6.025	0.000858	1456854_at		NEURL1	neuralized E3 ubiquitin protein ligase 1	Cytoplasm	enzyme
0.45	8.604	0.000303	1430043_at		TTC19	tetratricopeptide repeat domain 19	Cytoplasm	other
0.449	9.801	2.56e-05	1426509_s_at	D	GFAP	glial fibrillary acidic protein	Cytoplasm	other
0.448	7.728	0.00034	1438764_at		ANXA7	annexin A7	Plasma Membrane	ion channel
0.445	6.437	8.76e-05	1457303_at		ANKS3	ankyrin repeat and sterile alpha motif domain containing 3	Nucleus	transcription regulator
0.445	7.415	3.41e-05	1451969_s_at		PARP3	poly (ADP-ribose) polymerase family, member 3	Nucleus	enzyme
0.443	10.305	0.000702	1439477_at		5430406J06Rik	RIKEN cDNA 5430406J06 gene	Other	other
0.443	8.223	0.000258	1424051_at		COL4A2	collagen, type IV, alpha 2	Extracellular Space	other	collagenase clostridium histolyticum
0.443	7.952	0.000427	1435655_at		RPL12	ribosomal protein L12	Nucleus	other
0.443	8.383	1.67e-06	1438033_at		TEF	thyrotrophic embryonic factor	Nucleus	transcription regulator
0.441	8.436	0.00106	1436780_at	D	OGT	O-linked N-acetylglucosamine (GlcNAc) transferase	Cytoplasm	enzyme
0.441	6.586	0.000998	1453181_x_at		PLSCR1	phospholipid scramblase 1	Plasma Membrane	enzyme
0.441	7.562	0.000393	1441266_at		STRN3	striatin, calmodulin binding protein 3	Nucleus	transcription regulator
0.441	6.402	0.000556	1460302_at		THBS1	thrombospondin 1	Extracellular Space	other
0.44	8.275	0.000788	1428657_at		RREB1	ras responsive element binding protein 1	Nucleus	transcription regulator
0.439	8.133	0.00129	1431896_at	D	C14orf39	chromosome 14 open reading frame 39	Extracellular Space	other
0.439	8.078	0.00131	1428730_at		KRIT1	KRIT1, ankyrin repeat containing	Plasma Membrane	other
0.439	11.078	6.82e-06	1438976_x_at	D	MAT2A	methionine adenosyltransferase II, alpha	Cytoplasm	enzyme
0.437	7.889	0.00162	1427526_at		FGFR1OP2	FGFR1 oncogene partner 2	Cytoplasm	other
0.435	8.752	0.00127	1457374_at	D	NEDD4L	neural precursor cell expressed, developmentally down-regulated 4-like, E3 ubiquitin protein ligase	Cytoplasm	enzyme
0.434	6.687	1.01e-05	1430220_at		C5orf34	chromosome 5 open reading frame 34	Other	other
0.431	8.389	0.00144	1429639_at		GPCPD1	glycerophosphocholine phosphodiesterase GDE1 homolog (S. cerevisiae)	Other	other
0.431	7.001	0.00183	1446364_at		WWP1	WW domain containing E3 ubiquitin protein ligase 1	Cytoplasm	enzyme
0.428	7.28	0.00212	1458942_at		C230037E05Rik	RIKEN cDNA C230037E05 gene	Other	other
0.428	8.135	1.98e-05	1437359_at		RNPS1	RNA binding protein S1, serine-rich domain	Nucleus	other
0.428	9.538	6.84e-07	1424238_at		SIRT7	sirtuin 7	Nucleus	enzyme
0.428	9.356	6.66e-06	1448162_at	D	VCAM1	vascular cell adhesion molecule 1	Plasma Membrane	transmembrane receptor
0.427	7.479	0.00287	1457264_at		PHF20L1	PHD finger protein 20-like 1	Other	other
0.426	7.203	6.08e-05	1429946_at	D	CCDC141	coiled-coil domain containing 141	Cytoplasm	other
0.425	7.238	6.77e-06	1441403_at		6430501K19Rik	RIKEN cDNA 6430501K19 gene	Other	other
0.424	6.124	0.000271	1444565_at		BB166591	expressed sequence BB166591	Other	other
0.424	6.488	7.37e-06	1456629_at		KANK3	KN motif and ankyrin repeat domains 3	Cytoplasm	other
0.424	10.234	0.000229	1417426_at		Srgn	serglycin	Cytoplasm	other
0.424	7.496	0.00263	1428010_at		TIMM9	translocase of inner mitochondrial membrane 9 homolog (yeast)	Cytoplasm	transporter
0.421	10.263	0.000295	1435874_at	D	PRKAB2	protein kinase, AMP-activated, beta 2 non-catalytic subunit	Cytoplasm	kinase
0.419	5.401	1.08e-06	1416740_at	D	COL5A1	collagen, type V, alpha 1	Extracellular Space	other	collagenase clostridium histolyticum
0.419	8.683	0.00162	1418892_at		RHOJ	ras homolog family member J	Cytoplasm	enzyme
0.417	7.936	2.38e-05	1435711_at		AI480526	expressed sequence AI480526	Other	other
0.417	11.047	0.000776	1417001_a_at	D	RSRP1	arginine/serine-rich protein 1	Other	other
0.416	7.018	8.76e-06	1447851_x_at		ATP10A	ATPase, class V, type 10A	Plasma Membrane	transporter
0.414	8.482	0.000834	1440443_at		E030016H06Rik	RIKEN cDNA E030016H06 gene	Other	other
0.411	9.878	0.000178	1456262_at		RBM5	RNA binding motif protein 5	Nucleus	other
0.41	9.595	0.000648	1430579_at	D	TNIK	TRAF2 and NCK interacting kinase	Plasma Membrane	kinase
0.409	9.862	4.83e-06	1433598_at	D	ARGLU1	arginine and glutamate rich 1	Other	other
0.409	8.266	5.45e-05	1448500_a_at		LIME1	Lck interacting transmembrane adaptor 1	Extracellular Space	other
0.409	10.363	0.000234	1428539_at	D	SMG1	SMG1 phosphatidylinositol 3-kinase-related kinase	Cytoplasm	kinase
0.407	7.288	0.00229	1437775_at		DLST	dihydrolipoamide S-succinyltransferase (E2 component of 2-oxo-glutarate complex)	Cytoplasm	enzyme
0.405	5.481	0.000324	1458299_s_at		NFKBIE	nuclear factor of kappa light polypeptide gene enhancer in B-cells inhibitor, epsilon	Nucleus	transcription regulator
0.404	9.557	0.000779	1452035_at		COL4A1	collagen, type IV, alpha 1	Extracellular Space	other	collagenase clostridium histolyticum
0.403	9.305	6.29e-05	1437205_at	D	TCF25	transcription factor 25 (basic helix-loop-helix)	Nucleus	transcription regulator
0.403	8.553	0.00254	1438781_at		TET2	tet methylcytosine dioxygenase 2	Other	other
0.401	8.754	2.61e-05	1453429_at		4930467E23Rik (includes others)	RIKEN cDNA 4930467E23 gene	Other	other
0.401	7.147	0.00305	1453356_at		CPSF7	cleavage and polyadenylation specific factor 7, 59kDa	Nucleus	other
0.4	8.772	0.00189	1427126_at	D	Hspa1b	heat shock protein 1B	Cytoplasm	other
0.4	7.553	6.19e-05	1458203_at		SPIRE1	spire-type actin nucleation factor 1	Cytoplasm	other
0.396	9.134	3.82e-05	1438714_at		ZNF207	zinc finger protein 207	Nucleus	transcription regulator
0.395	7.777	2.83e-05	1457150_at		AI428301	expressed sequence AI428301	Other	other
0.395	7.631	0.000138	1453251_at		DHX30	DEAH (Asp-Glu-Ala-His) box helicase 30	Nucleus	enzyme
0.394	10.379	0.000317	1424252_at		HNRNPDL	heterogeneous nuclear ribonucleoprotein D-like	Nucleus	other
0.394	8.158	6.35e-05	1451097_at		VASP	vasodilator-stimulated phosphoprotein	Plasma Membrane	other
0.393	5.884	0.000293	1445866_at		MAST4	microtubule associated serine/threonine kinase family member 4	Other	kinase
0.393	7.832	0.000871	1437129_at		MGEA5	meningioma expressed antigen 5 (hyaluronidase)	Cytoplasm	enzyme
0.393	12.69	0.00301	1428942_at		Mt2	metallothionein 2	Other	other
0.393	9.064	0.000114	1460655_a_at	D	UBP1	upstream binding protein 1 (LBP-1a)	Cytoplasm	transcription regulator
0.392	9.11	0.00137	1438658_a_at		S1PR3	sphingosine-1-phosphate receptor 3	Plasma Membrane	G-protein coupled receptor	fingolimod
0.389	10.193	2.6e-05	1434935_at		AAK1	AP2 associated kinase 1	Cytoplasm	kinase
0.389	7.546	8.42e-05	1421322_a_at		IRF9	interferon regulatory factor 9	Nucleus	transcription regulator
0.388	7.567	0.000282	1437570_at		AI503301	expressed sequence AI503301	Other	other
0.388	9.947	1.06e-05	1432195_s_at	D	CCNL2	cyclin L2	Nucleus	other
0.387	6.313	0.00261	1429603_at		ATAT1	alpha tubulin acetyltransferase 1	Other	enzyme
0.387	9.063	4.21e-05	1434087_at		MTHFR	methylenetetrahydrofolate reductase (NAD(P)H)	Cytoplasm	enzyme
0.384	8.015	0.000212	1456909_at		GPI	glucose-6-phosphate isomerase	Extracellular Space	enzyme
0.384	8.022	0.00253	1449025_at		IFIT3	interferon-induced protein with tetratricopeptide repeats 3	Cytoplasm	other
0.384	7.208	0.000779	1448749_at	D	PLEK	pleckstrin	Cytoplasm	other
0.384	7.846	0.000776	1435125_at		PRIMA1	proline rich membrane anchor 1	Plasma Membrane	other
0.384	8.515	0.000251	1435391_at	D	Rbm33	RNA binding motif protein 33	Other	other
0.383	8.692	0.000173	1421087_at	D	PER3	period circadian clock 3	Nucleus	other
0.38	7.699	0.00171	1434135_at		B3GALNT2	beta-1,3-N-acetylgalactosaminyltransferase 2	Cytoplasm	enzyme
0.379	7.817	0.000756	1426750_at		FLNB	filamin B, beta	Cytoplasm	other
0.379	7.354	0.00241	1430418_at		TMEM57	transmembrane protein 57	Nucleus	other
0.378	7.481	7.97e-05	1441992_at		RAB14	RAB14, member RAS oncogene family	Cytoplasm	enzyme
0.378	7.393	3.46e-05	1420707_a_at		TRAIP	TRAF interacting protein	Cytoplasm	enzyme
0.377	8.335	2.14e-05	1458428_at	D	KCNT1	potassium channel, subfamily T, member 1	Plasma Membrane	ion channel
0.377	8.518	8.09e-05	1437250_at		MREG	melanoregulin	Cytoplasm	other
0.377	7.457	0.00016	1433523_at		RADIL	Ras association and DIL domains	Cytoplasm	other
0.377	6.916	0.00219	1430045_at		TSNAX	translin-associated factor X	Nucleus	transporter
0.376	10.911	2.92e-05	1429276_at		TRANK1	tetratricopeptide repeat and ankyrin repeat containing 1	Nucleus	transcription regulator
0.374	8.151	0.00149	1439293_at		FAM214A	family with sequence similarity 214, member A	Other	other
0.374	8.228	0.00117	1440090_at		SLC25A27	solute carrier family 25, member 27	Cytoplasm	transporter
0.373	5.821	0.000327	1430575_a_at		TPP2	tripeptidyl peptidase II	Cytoplasm	peptidase
0.372	7.333	5.76e-05	1435451_at		HELQ	helicase, POLQ-like	Nucleus	enzyme
0.371	7.004	0.00128	1427198_at		BC022960	cDNA sequence BC022960	Other	other
0.371	6.784	0.00269	1428727_at		CEP192	centrosomal protein 192kDa	Cytoplasm	other
0.369	8.621	3.89e-05	1428239_at		ANKRD16	ankyrin repeat domain 16	Other	other
0.369	8.303	5.12e-05	1422653_at		CEP70	centrosomal protein 70kDa	Cytoplasm	other
0.369	9.628	0.000647	1423530_at		STK32C	serine/threonine kinase 32C	Other	kinase
0.368	7.438	0.00179	1452350_at		BRD8	bromodomain containing 8	Nucleus	transcription regulator
0.367	8.855	4.81e-05	1434424_at		FLVCR1	feline leukemia virus subgroup C cellular receptor 1	Plasma Membrane	transporter
0.367	8.755	3.51e-05	1418825_at		Irgm1	immunity-related GTPase family M member 1	Cytoplasm	other
0.367	5.868	0.00265	1419599_s_at		MS4A6A	membrane-spanning 4-domains, subfamily A, member 6A	Other	other
0.367	9.26	0.000645	1427427_at		RYR3	ryanodine receptor 3	Plasma Membrane	ion channel
0.366	8.753	0.000608	1452321_at	D	BRWD1	bromodomain and WD repeat domain containing 1	Nucleus	transcription regulator
0.366	7.564	8.16e-05	1425860_x_at		CKLF	chemokine-like factor	Extracellular Space	cytokine
0.366	7.983	0.00305	1425156_at	D	GBP7	guanylate binding protein 7	Cytoplasm	enzyme
0.366	6.028	0.00304	1440854_at		KIAA0907	KIAA0907	Other	other
0.366	6.099	0.000118	1454954_at		WDR61	WD repeat domain 61	Other	other
0.364	5.992	0.000276	1439274_at		PRUNE2	prune homolog 2 (Drosophila)	Other	other
0.364	9.165	9.76e-06	1456386_at	D	RBM39	RNA binding motif protein 39	Nucleus	transcription regulator
0.364	8.431	9.98e-05	1452125_at		THRAP3	thyroid hormone receptor associated protein 3	Nucleus	transcription regulator
0.363	5.723	0.00021	1451901_at		HLTF	helicase-like transcription factor	Nucleus	transcription regulator
0.363	9.396	0.00235	1426863_at		RBMX	RNA binding motif protein, X-linked	Nucleus	other
0.362	9.491	0.000121	1422886_a_at	D	CLK4	CDC-like kinase 4	Nucleus	kinase
0.361	7.377	0.000106	1438591_at		STRADA	STE20-related kinase adaptor alpha	Nucleus	kinase
0.36	8.421	0.000222	1424790_at		SLC25A42	solute carrier family 25, member 42	Cytoplasm	transporter
0.359	6.918	0.000419	1427900_at		PIP5KL1	phosphatidylinositol-4-phosphate 5-kinase-like 1	Plasma Membrane	kinase
0.358	9.342	3.65e-05	1422710_a_at		CACNA1H	calcium channel, voltage-dependent, T type, alpha 1H subunit	Plasma Membrane	ion channel	cinnarizine, flunarizine, mibefradil, bepridil, zonisamide, isradipine
0.358	6.686	0.00108	1444706_at	D	NAV2	neuron navigator 2	Nucleus	other
0.357	8.05	0.000176	1424138_at		RHBDF1	rhomboid 5 homolog 1 (Drosophila)	Other	other
0.356	7.357	0.00196	1429180_at		GMPR2	guanosine monophosphate reductase 2	Cytoplasm	enzyme
0.355	6.588	0.000258	1441753_at		RICTOR	RPTOR independent companion of MTOR, complex 2	Cytoplasm	other
0.354	8.462	0.00158	1420962_at		HAPLN2	hyaluronan and proteoglycan link protein 2	Extracellular Space	other
0.354	9.507	0.000457	1419909_at	D	MPHOSPH9	M-phase phosphoprotein 9	Cytoplasm	other
0.353	7.823	0.000174	1437589_x_at		ZGPAT	zinc finger, CCCH-type with G patch domain	Nucleus	transcription regulator
0.352	7.768	0.00251	1428920_at		HMG20A	high mobility group 20A	Nucleus	transcription regulator
0.351	8.078	0.0018	1448316_at		CMTM3	CKLF-like MARVEL transmembrane domain containing 3	Extracellular Space	cytokine
0.35	6.852	0.000989	1442843_at		4933411D12Rik	RIKEN cDNA 4933411D12 gene	Other	other
0.349	8.072	0.000745	1457366_at		CDC40	cell division cycle 40	Nucleus	other
0.349	6.644	0.00175	1457205_at		NSF	N-ethylmaleimide-sensitive factor	Cytoplasm	transporter
0.348	5.729	0.00131	1457970_at		ACTR1A	ARP1 actin-related protein 1 homolog A, centractin alpha (yeast)	Cytoplasm	other
0.348	7.986	0.000866	1452688_at	D	PRPF39	pre-mRNA processing factor 39	Nucleus	other
0.348	7.067	0.000147	1416623_at		THBS3	thrombospondin 3	Extracellular Space	other
0.344	9.898	0.00113	1436549_a_at		Hnrnpa1	heterogeneous nuclear ribonucleoprotein A1	Nucleus	other
0.344	9.019	0.000931	1421821_at		LDLR	low density lipoprotein receptor	Plasma Membrane	transporter
0.344	8.855	0.00262	1436059_at		RFX1	regulatory factor X, 1 (influences HLA class II expression)	Nucleus	transcription regulator
0.343	9.142	0.000788	1454989_at		CSPP1	centrosome and spindle pole associated protein 1	Cytoplasm	other
0.343	6.637	0.000285	1429477_at		NCAPH2	non-SMC condensin II complex, subunit H2	Nucleus	other
0.342	10.046	1.79e-05	1433669_at	D	AKAP8	A kinase (PRKA) anchor protein 8	Nucleus	other
0.342	7.897	1.81e-05	1452809_at		IZUMO4	IZUMO family member 4	Nucleus	other
0.342	5.791	0.000989	1456334_s_at		Zfp783	zinc finger protein 783	Other	other
0.341	8.844	0.000153	1444150_at		EPB41	erythrocyte membrane protein band 4.1 (elliptocytosis 1, RH-linked)	Plasma Membrane	other
0.341	6.539	0.000353	1449455_at		HCK	hemopoietic cell kinase	Cytoplasm	kinase	bosutinib
0.34	6.052	0.001	1458033_at		UBR1	ubiquitin protein ligase E3 component n-recognin 1	Cytoplasm	enzyme
0.338	7.561	0.00134	1455605_at		RUFY3	RUN and FYVE domain containing 3	Plasma Membrane	other
0.337	9.409	0.000262	1416813_at	D	TIA1	TIA1 cytotoxic granule-associated RNA binding protein	Nucleus	other
0.336	6.328	0.000771	1437274_at		COPA	coatomer protein complex, subunit alpha	Cytoplasm	transporter
0.336	7.167	0.000673	1440281_at		RMND1	required for meiotic nuclear division 1 homolog (S. cerevisiae)	Cytoplasm	other
0.335	5.346	0.00171	1438816_at		AHCTF1	AT hook containing transcription factor 1	Nucleus	transcription regulator
0.335	8.254	9.13e-05	1419817_s_at		ANKZF1	ankyrin repeat and zinc finger domain containing 1	Nucleus	transcription regulator
0.335	8.361	0.00176	1417045_at		BID	BH3 interacting domain death agonist	Cytoplasm	other
0.335	8.852	0.000647	1424174_at		SHKBP1	SH3KBP1 binding protein 1	Other	other
0.334	7.896	2.08e-05	1442119_at		AI449212	expressed sequence AI449212	Other	other
0.333	8.404	0.000297	1449248_at		CLCN2	chloride channel, voltage-sensitive 2	Plasma Membrane	ion channel	lubiprostone
0.33	8.653	0.000129	1437180_at		SNRNP48	small nuclear ribonucleoprotein 48kDa (U11/U12)	Nucleus	other
0.329	7.241	0.00109	1437785_at		ADAMTS9	ADAM metallopeptidase with thrombospondin type 1 motif, 9	Extracellular Space	peptidase
0.328	9.675	0.00139	1438192_s_at		BAZ2A	bromodomain adjacent to zinc finger domain, 2A	Nucleus	transcription regulator
0.328	9.895	0.000117	1454785_at		DUSP11	dual specificity phosphatase 11 (RNA/RNP complex 1-interacting)	Nucleus	phosphatase
0.328	9.922	5.27e-05	1428308_at	D	PDRG1	p53 and DNA-damage regulated 1	Cytoplasm	other
0.328	6.686	0.000744	1420413_at		SLC7A11	solute carrier family 7 (anionic amino acid transporter light chain, xc- system), member 11	Plasma Membrane	transporter
0.327	8.52	0.000232	1417750_a_at		SLC25A37	solute carrier family 25 (mitochondrial iron transporter), member 37	Cytoplasm	other
0.326	9.773	3.21e-05	1417734_at		AKAP8L	A kinase (PRKA) anchor protein 8-like	Nucleus	other
0.326	6.733	0.00103	1444716_at		METTL2A	methyltransferase like 2A	Other	enzyme
0.325	6.289	0.00048	1431412_at		2810455B08Rik	RIKEN cDNA 2810455B08 gene	Other	other
0.325	10.229	0.000139	1451388_a_at		ATP11B	ATPase, class VI, type 11B	Plasma Membrane	transporter
0.325	7.626	0.00144	1420342_at		Gdap10	ganglioside-induced differentiation-associated-protein 10	Other	other
0.324	8.838	1.35e-05	1426238_at		BMP1	bone morphogenetic protein 1	Extracellular Space	peptidase
0.324	8.734	0.00245	1437022_at		UBN2	ubinuclein 2	Nucleus	other
0.323	6.802	7.44e-05	1433184_at		6720477C19Rik	RIKEN cDNA 6720477C19 gene	Other	other
0.323	10.927	0.000541	1433561_at		ACAP2	ArfGAP with coiled-coil, ankyrin repeat and PH domains 2	Nucleus	other
0.323	9.48	0.000126	1422573_at		AMPD3	adenosine monophosphate deaminase 3	Cytoplasm	enzyme
0.322	9.996	0.00133	1443824_s_at		CA7	carbonic anhydrase VII	Cytoplasm	enzyme	ethoxyzolamide, dichlorphenamide, methazolamide, hydrochlorothiazide, acetazolamide, trichloromethiazide, chlorothiazide, chlorthalidone, benzthiazide, sulfacetamide, topiramate
0.322	7.504	0.002	1455195_at		RPS24	ribosomal protein S24	Cytoplasm	other
0.322	7.143	0.000517	1416564_at		SOX7	SRY (sex determining region Y)-box 7	Nucleus	transcription regulator
0.321	8.309	0.000133	1460210_at		PKD1	polycystic kidney disease 1 (autosomal dominant)	Plasma Membrane	ion channel
0.319	5.607	0.00218	1431118_at		6720427H10Rik	RIKEN cDNA 6720427H10 gene	Other	other
0.319	8.631	0.00207	1451780_at		BLNK	B-cell linker	Cytoplasm	other
0.318	6.984	0.000743	1439341_at		GREB1L	growth regulation by estrogen in breast cancer-like	Extracellular Space	other
0.318	6.784	0.00109	1433893_s_at		SPAG5	sperm associated antigen 5	Nucleus	peptidase
0.317	9.026	0.00211	1421595_at		Fam184b	family with sequence similarity 184, member B	Other	other
0.317	7.401	0.00171	1429049_at		NUAK2	NUAK family, SNF1-like kinase, 2	Other	kinase
0.316	6.04	0.00104	1444714_at		DCDC2B	doublecortin domain containing 2B	Other	other
0.315	8.135	8.78e-05	1425706_a_at		DDB2	damage-specific DNA binding protein 2, 48kDa	Nucleus	other
0.315	4.954	0.00234	1437809_x_at		ETS2	v-ets avian erythroblastosis virus E26 oncogene homolog 2	Nucleus	transcription regulator
0.315	10.135	0.000498	1423584_at		IGFBP7	insulin-like growth factor binding protein 7	Extracellular Space	transporter
0.314	8.496	0.000872	1455150_at		HECW2	HECT, C2 and WW domain containing E3 ubiquitin protein ligase 2	Extracellular Space	enzyme
0.311	6.786	0.000133	1436728_s_at		RTEL1	regulator of telomere elongation helicase 1	Nucleus	enzyme
0.309	9.23	0.000303	1454952_s_at		NCAPD3	non-SMC condensin II complex, subunit D3	Nucleus	other
0.308	8.117	0.000209	1430171_at		FIBP	fibroblast growth factor (acidic) intracellular binding protein	Nucleus	other
0.308	8.17	0.00291	1440274_at		RAPGEF4	Rap guanine nucleotide exchange factor (GEF) 4	Cytoplasm	other
0.308	8.342	0.00169	1455197_at		RND1	Rho family GTPase 1	Cytoplasm	enzyme
0.308	5.926	0.000812	1426958_at		RPS9	ribosomal protein S9	Cytoplasm	translation regulator
0.308	7.336	0.00116	1449041_a_at		TRIP6	thyroid hormone receptor interactor 6	Extracellular Space	cytokine
0.305	10.466	1.83e-05	1425036_a_at	D	TNRC6A	trinucleotide repeat containing 6A	Nucleus	other
0.304	7.982	7.44e-05	1433101_at		9030419F21Rik	RIKEN cDNA 9030419F21 gene	Other	other
0.304	6.166	0.0015	1458320_at		ERICH6	glutamate-rich 6	Other	other
0.304	10.53	9.92e-05	1428599_at		KNDC1	kinase non-catalytic C-lobe domain (KIND) containing 1	Plasma Membrane	other
0.303	9.869	4.2e-05	1426670_at		AGRN	agrin	Plasma Membrane	other
0.303	8.102	0.000135	1433961_at		RRNAD1	ribosomal RNA adenine dimethylase domain containing 1	Other	other
0.302	10.356	0.000204	1428467_at		TARDBP	TAR DNA binding protein	Nucleus	transcription regulator
0.3	7.77	0.00108	1440444_at		FADS1	fatty acid desaturase 1	Plasma Membrane	enzyme
0.299	7.347	0.00112	1431893_a_at		PDSS1	prenyl (decaprenyl) diphosphate synthase, subunit 1	Cytoplasm	enzyme
0.299	10.384	0.000104	1428282_at		TBCE	tubulin folding cofactor E	Cytoplasm	other
0.298	7.446	0.000204	1432850_at		5430434G16Rik	RIKEN cDNA 5430434G16 gene	Other	other
0.298	9.011	0.000205	1451326_at		ABHD14B	abhydrolase domain containing 14B	Cytoplasm	enzyme
0.298	9.443	2.2e-05	1438233_at		FAM178A	family with sequence similarity 178, member A	Extracellular Space	other
0.298	8.174	0.000309	1425585_at		MED12	mediator complex subunit 12	Nucleus	transcription regulator
0.297	10.508	0.000324	1453098_at		GRIA2	glutamate receptor, ionotropic, AMPA 2	Plasma Membrane	ion channel	talampanel, farampator, LY451395, tezampanel
0.296	7.438	0.00193	1458690_at		MARCH7	membrane-associated ring finger (C3HC4) 7, E3 ubiquitin protein ligase	Extracellular Space	other
0.296	6.312	0.00159	1458550_at		MYO1D	myosin ID	Plasma Membrane	other
0.296	6.71	0.0013	1443851_at		PPP4R4	protein phosphatase 4, regulatory subunit 4	Cytoplasm	other
0.295	9.716	0.00102	1418007_at	D	PAXBP1	PAX3 and PAX7 binding protein 1	Nucleus	other
0.295	9.861	0.00182	1428100_at	D	SRSF1	serine/arginine-rich splicing factor 1	Nucleus	other
0.294	8.024	0.00111	1440262_at		AI414108	expressed sequence AI414108	Other	other
0.294	9.815	0.000718	1416111_at		CD83	CD83 molecule	Plasma Membrane	transmembrane receptor
0.294	9.81	0.000251	1424544_at		Nrbp2	nuclear receptor binding protein 2	Cytoplasm	other
0.293	9.302	0.000468	1448199_at		ANKRD10	ankyrin repeat domain 10	Nucleus	transcription regulator
0.292	9.776	0.000908	1423063_at	D	DNMT3A	DNA (cytosine-5-)-methyltransferase 3 alpha	Nucleus	enzyme
0.292	10.753	2.11e-05	1423687_a_at		MAN2C1	mannosidase, alpha, class 2C, member 1	Cytoplasm	enzyme
0.292	5.505	0.000401	1444231_at		ZDHHC6	zinc finger, DHHC-type containing 6	Nucleus	enzyme
0.291	8.284	0.0013	1426774_at		PARP12	poly (ADP-ribose) polymerase family, member 12	Nucleus	other
0.289	7.464	0.00192	1441440_at		ATG4C	autophagy related 4C, cysteine peptidase	Cytoplasm	peptidase
0.289	7.683	0.0016	1435477_s_at		FCGR2B	Fc fragment of IgG, low affinity IIb, receptor (CD32)	Plasma Membrane	transmembrane receptor	IgG
0.289	9.902	0.000115	1449618_s_at		PAGR1	PAXIP1 associated glutamate-rich protein 1	Nucleus	other
0.288	6.41	0.00187	1457760_at		A930004J17Rik	RIKEN cDNA A930004J17 gene	Other	other
0.288	7.282	0.000263	1455987_at		SEC61A1	Sec61 alpha 1 subunit (S. cerevisiae)	Cytoplasm	transporter
0.287	7.868	0.00128	1436753_at		ADCK5	aarF domain containing kinase 5	Cytoplasm	kinase
0.287	6.997	0.000342	1435036_at		ASPG	asparaginase	Other	enzyme
0.287	9.693	9.36e-05	1455628_at		EPB41L4B	erythrocyte membrane protein band 4.1 like 4B	Other	transporter
0.287	9.394	5.55e-05	1435257_at	D	KLHL17	kelch-like family member 17	Cytoplasm	other
0.286	7.823	3.46e-05	1439671_at		4930466K18Rik	RIKEN cDNA 4930466K18 gene	Other	other
0.285	10.461	0.000393	1423622_a_at		CCNL1	cyclin L1	Nucleus	other
0.285	8.802	0.00145	1416591_at	D	RAB34	RAB34, member RAS oncogene family	Cytoplasm	enzyme
0.285	11.333	0.000103	1452848_at		Tmem181b-ps	transmembrane protein 181B, pseudogene	Other	other
0.284	7.263	0.000442	1445881_at		2310035P21Rik	RIKEN cDNA 2310035P21 gene	Other	other
0.284	7.76	0.000883	1439773_at		LY6E	lymphocyte antigen 6 complex, locus E	Plasma Membrane	other
0.284	7.752	0.000747	1449490_at		MBD4	methyl-CpG binding domain protein 4	Nucleus	enzyme
0.284	7.738	0.000563	1434394_at		N4BP2	NEDD4 binding protein 2	Cytoplasm	kinase
0.283	9.567	0.000923	1451931_x_at	D	HLA-A	major histocompatibility complex, class I, A	Plasma Membrane	other
0.282	8.223	0.000337	1429883_at		ACTL6A	actin-like 6A	Nucleus	other
0.282	7.122	0.00184	1438433_at		WHAMM	WAS protein homolog associated with actin, golgi membranes and microtubules	Cytoplasm	other
0.281	10.284	0.000124	1434742_s_at		AIFM3	apoptosis-inducing factor, mitochondrion-associated, 3	Cytoplasm	enzyme
0.281	8.617	0.00122	1445438_at		DDHD1	DDHD domain containing 1	Extracellular Space	enzyme
0.281	5.284	0.00214	1457209_at		DDHD2	DDHD domain containing 2	Cytoplasm	other
0.281	9.33	0.00132	1423460_at		GIGYF1	GRB10 interacting GYF protein 1	Extracellular Space	other
0.28	9.642	0.000508	1424081_at		PCGF6	polycomb group ring finger 6	Nucleus	transcription regulator
0.279	7.126	0.00299	1445329_at		DTNB	dystrobrevin, beta	Plasma Membrane	other
0.279	7.315	0.000323	1443625_at	D	NAA40	N(alpha)-acetyltransferase 40, NatD catalytic subunit	Other	other
0.278	8.593	0.00052	1435470_at		1810015C11Rik	RIKEN cDNA 1810015C11 gene	Other	other
0.278	8.715	0.00216	1451234_at		Fam193b	family with sequence similarity 193, member B	Cytoplasm	other
0.278	6.116	0.00301	1453416_at		GAS2L3	growth arrest-specific 2 like 3	Other	other
0.278	6.701	0.00105	1449531_at		LEPREL2	leprecan-like 2	Nucleus	enzyme
0.277	7.297	0.000125	1454913_at		C1orf109	chromosome 1 open reading frame 109	Other	other
0.277	8.338	0.000881	1434833_at	D	MAP4K2	mitogen-activated protein kinase kinase kinase kinase 2	Cytoplasm	kinase
0.276	8.773	0.000766	1417928_at		PDLIM4	PDZ and LIM domain 4	Plasma Membrane	other
0.276	6.115	0.00259	1439953_at		PMM2	phosphomannomutase 2	Cytoplasm	enzyme
0.276	9.69	2.91e-05	1448948_at		SLC50A1	solute carrier family 50 (sugar efflux transporter), member 1	Plasma Membrane	transporter
0.272	5.685	5.51e-05	1444980_at		ONECUT2	one cut homeobox 2	Nucleus	transcription regulator
0.272	12.197	0.00237	1438403_s_at		RAMP2	receptor (G protein-coupled) activity modifying protein 2	Plasma Membrane	transporter	pramlintide
0.271	7.127	0.000777	1459151_x_at		IFI35	interferon-induced protein 35	Nucleus	other
0.271	8.08	0.000936	1438065_at		RPRD1A	regulation of nuclear pre-mRNA domain containing 1A	Extracellular Space	other
0.271	9.301	0.00113	1429240_at	D	STARD4	StAR-related lipid transfer (START) domain containing 4	Cytoplasm	transporter
0.27	7.275	0.00115	1444288_at		PNPT1	polyribonucleotide nucleotidyltransferase 1	Cytoplasm	enzyme
0.269	9.101	0.000217	1452268_at	D	FAM76B	family with sequence similarity 76, member B	Nucleus	other
0.269	8.628	0.000326	1455624_at		Gm3764	predicted gene 3764	Other	other
0.269	7.78	0.000523	1439726_at		TMEM186	transmembrane protein 186	Cytoplasm	other
0.268	6.801	0.000847	1446965_at		ARHGEF12	Rho guanine nucleotide exchange factor (GEF) 12	Cytoplasm	other
0.268	9.876	0.00197	1456388_at		ATP11A	ATPase, class VI, type 11A	Plasma Membrane	transporter
0.267	8.737	5.04e-05	1438437_a_at		4933439C10Rik	RIKEN cDNA 4933439C10 gene	Other	other
0.267	7.004	0.00065	1445147_at		PSME4	proteasome (prosome, macropain) activator subunit 4	Cytoplasm	other
0.267	9.202	0.0024	1416252_at		STK38	serine/threonine kinase 38	Nucleus	kinase
0.267	8.33	8.08e-05	1439201_at		USP14	ubiquitin specific peptidase 14 (tRNA-guanine transglycosylase)	Cytoplasm	peptidase
0.267	5.994	0.00111	1445201_at		Zfp53	zinc finger protein 53	Nucleus	other
0.267	7.503	0.000143	1445543_at		ZMYM5	zinc finger, MYM-type 5	Nucleus	other
0.266	10.18	0.000155	1435193_at		C19orf66	chromosome 19 open reading frame 66	Other	other
0.266	9.812	0.000129	1426803_at		RBM26	RNA binding motif protein 26	Other	other
0.266	8.393	0.00148	1426691_at		TJAP1	tight junction associated protein 1 (peripheral)	Plasma Membrane	other
0.265	6.052	0.00151	1439127_at		KIAA0368	KIAA0368	Cytoplasm	other
0.265	7.799	0.000264	1457552_at		ZBTB21	zinc finger and BTB domain containing 21	Nucleus	other
0.263	8.284	0.000504	1416618_at		PPOX	protoporphyrinogen oxidase	Cytoplasm	enzyme
0.263	7.404	3.29e-05	1455967_at		SORBS1	sorbin and SH3 domain containing 1	Plasma Membrane	other
0.262	9.645	0.0014	1452916_at		KMT2B	lysine (K)-specific methyltransferase 2B	Nucleus	transcription regulator
0.262	8.287	0.00268	1427425_at		SLC25A51	solute carrier family 25, member 51	Cytoplasm	other
0.259	7.445	0.000463	1456706_at		4833441D16Rik	RIKEN cDNA 4833441D16 gene	Other	other
0.259	5.867	0.00012	1444436_at		9630030I15Rik	RIKEN cDNA 9630030I15 gene	Other	other
0.259	9.814	0.000187	1436265_at		Gm10419	predicted gene 10419	Other	other
0.259	8.056	0.00213	1439180_at		INO80D	INO80 complex subunit D	Other	other
0.259	6.643	0.00117	1431385_a_at		MBTPS1	membrane-bound transcription factor peptidase, site 1	Cytoplasm	peptidase
0.258	8.263	0.000581	1420996_at		PLXNA3	plexin A3	Plasma Membrane	transmembrane receptor
0.258	9.327	0.000533	1460026_s_at		ZFYVE27	zinc finger, FYVE domain containing 27	Plasma Membrane	other
0.256	7.008	0.00222	1445037_at		GIT2	G protein-coupled receptor kinase interacting ArfGAP 2	Nucleus	other
0.256	9.692	0.0014	1431818_at		Rab10os	RAB10, member RAS oncogene family, opposite strand	Other	other
0.255	8.35	0.00122	1434258_s_at		PHACTR4	phosphatase and actin regulator 4	Plasma Membrane	other
0.255	7.645	0.000958	1440268_at		TRIM41	tripartite motif containing 41	Cytoplasm	other
0.254	8.201	0.00164	1424469_a_at		CPSF4	cleavage and polyadenylation specific factor 4, 30kDa	Nucleus	other
0.254	10.233	0.00163	1423613_at		SSFA2	sperm specific antigen 2	Plasma Membrane	other
0.253	4.907	0.000738	1422874_at		ACRBP	acrosin binding protein	Extracellular Space	other
0.252	8.74	0.00239	1423505_at		TAGLN	transgelin	Cytoplasm	other
0.25	8.83	0.0015	1455680_at		9630025H16Rik	RIKEN cDNA 9630025H16 gene	Other	other
0.25	6.307	0.000675	1441617_at		MED15	mediator complex subunit 15	Nucleus	transcription regulator
0.249	7.492	0.00292	1455314_at		LPP	LIM domain containing preferred translocation partner in lipoma	Nucleus	other
0.249	7.621	0.00124	1449283_a_at		MAPK12	mitogen-activated protein kinase 12	Cytoplasm	kinase	talmapimod
0.248	7.66	0.000272	1424470_a_at		RAPGEF3	Rap guanine nucleotide exchange factor (GEF) 3	Nucleus	other
0.248	8.99	0.00167	1437449_at		RSAD1	radical S-adenosyl methionine domain containing 1	Cytoplasm	other
0.248	8.154	0.000169	1428769_at		TATDN3	TatD DNase domain containing 3	Cytoplasm	other
0.247	8.959	0.000408	1460695_a_at		C9orf3	chromosome 9 open reading frame 3	Cytoplasm	peptidase
0.247	8.143	0.00136	1456411_at		RCCD1	RCC1 domain containing 1	Other	other
0.247	7.686	0.00086	1436302_at		SLC10A7	solute carrier family 10, member 7	Other	transporter
0.246	6.336	0.00206	1432352_at		CCNY	cyclin Y	Nucleus	other
0.246	9.604	0.00145	1428270_at		GLT8D1	glycosyltransferase 8 domain containing 1	Cytoplasm	enzyme
0.246	10.074	0.000897	1434674_at		LYST	lysosomal trafficking regulator	Cytoplasm	transporter
0.246	8.226	0.00259	1435206_at		SLC24A4	solute carrier family 24 (sodium/potassium/calcium exchanger), member 4	Plasma Membrane	transporter
0.246	6.925	0.000636	1438234_at		WDR26	WD repeat domain 26	Cytoplasm	other
0.244	8.349	7.56e-05	1426270_at		SMC5	structural maintenance of chromosomes 5	Nucleus	other
0.244	7.526	0.000191	1458079_at		USP40	ubiquitin specific peptidase 40	Other	peptidase
0.243	8.567	0.000581	1434493_at		C8orf59	chromosome 8 open reading frame 59	Other	other
0.242	8.745	6.01e-05	1422009_at		ATP1B2	ATPase, Na+/K+ transporting, beta 2 polypeptide	Plasma Membrane	transporter
0.242	8.643	0.000111	1435676_at		CEP164	centrosomal protein 164kDa	Cytoplasm	other
0.242	9.429	0.00105	1417743_at		CLK2	CDC-like kinase 2	Nucleus	kinase
0.242	8.855	0.00165	1433715_at		CPNE7	copine VII	Other	transporter
0.241	8.542	0.000549	1416968_a_at		HSD3B7	hydroxy-delta-5-steroid dehydrogenase, 3 beta- and steroid delta-isomerase 7	Cytoplasm	enzyme
0.241	11.147	0.00105	1417654_at		SDC4	syndecan 4	Plasma Membrane	other
0.239	8.096	6.66e-05	1456476_at		ATXN2L	ataxin 2-like	Nucleus	other
0.239	8.858	0.00055	1429556_at		TEAD1	TEA domain family member 1 (SV40 transcriptional enhancer factor)	Nucleus	transcription regulator
0.238	9.517	0.00202	1429486_at		PFKFB2	6-phosphofructo-2-kinase/fructose-2,6-biphosphatase 2	Cytoplasm	kinase
0.237	6.831	0.000788	1446861_at		GNS	glucosamine (N-acetyl)-6-sulfatase	Cytoplasm	enzyme
0.237	7.756	0.000324	1460035_at		PHB2	prohibitin 2	Cytoplasm	transcription regulator
0.237	9.862	0.000873	1426829_at		UIMC1	ubiquitin interaction motif containing 1	Nucleus	other
0.237	10.153	0.00029	1434842_s_at		UPF3B	UPF3 regulator of nonsense transcripts homolog B (yeast)	Nucleus	transporter
0.235	8.217	0.00128	1435935_at		C12orf49	chromosome 12 open reading frame 49	Other	other
0.235	8.644	0.00131	1441003_at		ERCC4	excision repair cross-complementation group 4	Nucleus	enzyme
0.235	9.315	0.000686	1437869_at		PPP2R3A	protein phosphatase 2, regulatory subunit B'', alpha	Nucleus	phosphatase
0.234	10.045	0.00144	1424645_at		TNRC6C	trinucleotide repeat containing 6C	Cytoplasm	other
0.233	9.091	0.000134	1426739_at		DONSON	downstream neighbor of SON	Extracellular Space	other
0.233	9.051	0.000865	1424902_at		PLXDC1	plexin domain containing 1	Plasma Membrane	other
0.233	6.648	0.00272	1453123_at	D	SF3B2	splicing factor 3b, subunit 2, 145kDa	Nucleus	other
0.232	8.076	0.0019	1439615_at		GAN	gigaxonin	Cytoplasm	other
0.231	6.995	0.00146	1425881_at		Psg18 (includes others)	pregnancy specific glycoprotein 18	Extracellular Space	other
0.23	9.733	0.000262	1418249_at		CRCP	CGRP receptor component	Plasma Membrane	transmembrane receptor
0.23	8.156	0.000777	1436592_at		Zfp811	zinc finger protein 811	Other	other
0.228	10.215	0.00132	1424071_s_at		KIAA0947	KIAA0947	Other	other
0.228	7.365	0.000277	1415983_at		LCP1	lymphocyte cytosolic protein 1 (L-plastin)	Cytoplasm	other
0.228	9.993	0.00222	1453140_at		Zfp871	zinc finger protein 871	Other	other
0.227	7.495	0.0014	1427944_at		CAPRIN2	caprin family member 2	Cytoplasm	other
0.227	8.844	0.000259	1418107_at		TCEA2	transcription elongation factor A (SII), 2	Nucleus	transcription regulator
0.227	12.049	0.000215	1454774_at	D	ZNF445	zinc finger protein 445	Nucleus	transcription regulator
0.226	8.496	0.000585	1453023_at	D	ANKHD1/ANKHD1-EIF4EBP3	ankyrin repeat and KH domain containing 1	Other	other
0.226	9.273	0.00131	1440831_at		BACH1	BTB and CNC homology 1, basic leucine zipper transcription factor 1	Nucleus	transcription regulator
0.226	7.69	0.000558	1453846_at		CHPF2	chondroitin polymerizing factor 2	Cytoplasm	enzyme
0.226	9.405	0.000241	1436093_at		EPHA10	EPH receptor A10	Plasma Membrane	transmembrane receptor
0.226	6.933	0.00231	1418483_a_at		Ggta1	glycoprotein galactosyltransferase alpha 1, 3	Cytoplasm	other
0.226	11.12	0.00136	1416147_at		HSPA4	heat shock 70kDa protein 4	Cytoplasm	other
0.226	11.518	0.000208	1418360_at	D	RNF112	ring finger protein 112	Nucleus	transcription regulator
0.226	8.037	0.000106	1424059_at		SUV420H2	suppressor of variegation 4-20 homolog 2 (Drosophila)	Nucleus	enzyme
0.225	7.492	0.0018	1459133_at		EDEM3	ER degradation enhancer, mannosidase alpha-like 3	Cytoplasm	enzyme
0.224	9.702	0.000895	1438178_x_at	D	ATAD3A	ATPase family, AAA domain containing 3A	Cytoplasm	other
0.224	9.098	0.000169	1457726_at		RPS15A	ribosomal protein S15a	Cytoplasm	other
0.222	8.622	0.00307	1427176_s_at		SYNE4	spectrin repeat containing, nuclear envelope family member 4	Nucleus	other
0.222	7.672	0.000325	1423316_at		TMEM39A	transmembrane protein 39A	Other	other
0.22	9.592	0.00119	1455398_at		LRRC8C	leucine rich repeat containing 8 family, member C	Cytoplasm	other
0.219	9.764	6.49e-05	1421739_a_at		MATK	megakaryocyte-associated tyrosine kinase	Cytoplasm	kinase
0.219	8.369	0.000812	1460541_at		SLC7A6	solute carrier family 7 (amino acid transporter light chain, y+L system), member 6	Plasma Membrane	transporter
0.219	12.335	0.00177	1436936_s_at		XIST	X inactive specific transcript (non-protein coding)	Nucleus	other
0.217	9.175	0.00231	1422445_at		ITGA6	integrin, alpha 6	Plasma Membrane	transmembrane receptor
0.217	8.045	0.00203	1419898_s_at		ZC3H7A	zinc finger CCCH-type containing 7A	Extracellular Space	other
0.216	7.367	0.00131	1446735_at		ITSN2	intersectin 2	Cytoplasm	other
0.216	9.656	0.00198	1418414_at	D	KCNH1	potassium voltage-gated channel, subfamily H (eag-related), member 1	Plasma Membrane	ion channel
0.216	9.396	0.00196	1434806_at	D	MTX3	metaxin 3	Other	other
0.216	10.411	0.000377	1423324_at		PNN	pinin, desmosome associated protein	Plasma Membrane	other
0.215	10.003	0.000142	1435913_at		B4GALNT4	beta-1,4-N-acetyl-galactosaminyl transferase 4	Extracellular Space	enzyme
0.215	10.521	0.000549	1433574_at		CDC37L1	cell division cycle 37-like 1	Cytoplasm	other
0.215	11.441	0.00246	1427123_s_at		Copg2os2	coatomer protein complex, subunit gamma 2, opposite strand 2	Other	other
0.215	7.808	0.00174	1442660_at		PPIL2	peptidylprolyl isomerase (cyclophilin)-like 2	Nucleus	enzyme
0.214	7.942	0.000523	1435114_at		WDHD1	WD repeat and HMG-box DNA binding protein 1	Nucleus	other
0.213	8.698	0.00212	1435480_at		BRAF	v-raf murine sarcoma viral oncogene homolog B	Cytoplasm	enzyme	vemurafenib, dabrafenib, regorafenib, bortezomib/sorafenib, dexamethasone/lenalidomide/sorafenib, bevacizumab/sorafenib, LGX-818, dabrafenib/trametinib, sorafenib
0.213	9.545	0.00205	1428967_at		IGF1R	insulin-like growth factor 1 receptor	Plasma Membrane	transmembrane receptor	linsitinib, cixutumumab, ganitumab, AVE1642, BIIB022, IGF1, ceritinib
0.212	9.34	0.000297	1426516_a_at		LPIN1	lipin 1	Nucleus	phosphatase
0.212	9.486	0.0015	1427107_at		SLC16A11	solute carrier family 16, member 11	Cytoplasm	transporter
0.21	5.377	0.000411	1439704_at		HDAC2	histone deacetylase 2	Nucleus	transcription regulator	tributyrin, belinostat, pyroxamide, bortezomib/vorinostat, aminophylline, vorinostat, romidepsin, theophylline
0.21	6.719	0.00165	1437965_at		HEATR1	HEAT repeat containing 1	Nucleus	other
0.21	9.803	0.00132	1426069_s_at	D	SLC7A4	solute carrier family 7, member 4	Plasma Membrane	transporter
0.21	8.723	0.00296	1453182_a_at		SMPD4	sphingomyelin phosphodiesterase 4, neutral membrane (neutral sphingomyelinase-3)	Cytoplasm	enzyme
0.209	8.234	0.000226	1438807_at		HNRNPR	heterogeneous nuclear ribonucleoprotein R	Nucleus	other
0.209	8.645	0.00189	1427705_a_at		NFKB1	nuclear factor of kappa light polypeptide gene enhancer in B-cells 1	Nucleus	transcription regulator	dexamethasone/thalidomide, bortezomib/dexamethasone/thalidomide, rituximab/thalidomide, bortezomib/thalidomide, prednisone/thalidomide, triflusal, thalidomide
0.209	7.814	0.0015	1440223_at		RBM6	RNA binding motif protein 6	Nucleus	other
0.207	6.837	0.0011	1445867_at		AL023008	expressed sequence AL023008	Other	other
0.207	9.187	0.000973	1437829_s_at		EEF2K	eukaryotic elongation factor-2 kinase	Cytoplasm	kinase
0.207	7.382	0.000667	1450059_at		FANCG	Fanconi anemia, complementation group G	Nucleus	other
0.206	7.426	0.00286	1416544_at		EZH2	enhancer of zeste homolog 2 (Drosophila)	Nucleus	transcription regulator
0.206	6.43	0.000896	1442933_at		FOXK2	forkhead box K2	Nucleus	transcription regulator
0.206	9.445	0.00108	1456764_at		SLC35F3	solute carrier family 35, member F3	Other	other
0.205	7.54	0.000774	1453681_at		ATPIF1	ATPase inhibitory factor 1	Cytoplasm	other
0.205	9.657	0.000797	1423630_at		CYGB	cytoglobin	Cytoplasm	transporter
0.205	8.8	0.00181	1427672_a_at		KDM6A	lysine (K)-specific demethylase 6A	Nucleus	other
0.205	11.045	0.000701	1449770_x_at	D	Tmem191c	transmembrane protein 191C	Other	other
0.204	9.634	0.000487	1420644_a_at		SEC61A2	Sec61 alpha 2 subunit (S. cerevisiae)	Cytoplasm	transporter
0.203	8.934	0.00253	1434417_at		CAPN15	calpain 15	Other	peptidase
0.203	7.981	0.00169	1430302_at		CNRIP1	cannabinoid receptor interacting protein 1	Other	other
0.203	9.406	0.00224	1440795_x_at		RABEP2	rabaptin, RAB GTPase binding effector protein 2	Cytoplasm	other
0.203	7.45	0.00155	1416275_at		SLC26A6	solute carrier family 26 (anion exchanger), member 6	Cytoplasm	transporter
0.202	8.586	0.000871	1423678_at		C17orf62	chromosome 17 open reading frame 62	Other	other
0.2	8.72	0.00074	1435719_at		AI448984	expressed sequence AI448984	Other	other
0.2	9.283	0.00266	1425731_at		ANKRD24	ankyrin repeat domain 24	Other	other
0.2	9.578	0.00295	1415806_at		PLAT	plasminogen activator, tissue	Extracellular Space	peptidase	6-aminocaproic acid
0.199	9.127	0.000968	1436247_at		INTS2	integrator complex subunit 2	Nucleus	other
0.198	9.643	0.0021	1416207_at		TAZ	tafazzin	Nucleus	enzyme
0.195	8.294	0.0007	1417849_at		ZNF704	zinc finger protein 704	Other	other
0.194	8.68	0.00293	1434919_at		AGPS	alkylglycerone phosphate synthase	Cytoplasm	enzyme
0.194	11.884	0.000624	1435740_at		ZMIZ1	zinc finger, MIZ-type containing 1	Nucleus	other
0.192	7.889	0.00224	1455765_a_at		ABCC8	ATP-binding cassette, sub-family C (CFTR/MRP), member 8	Plasma Membrane	transporter	minoxidil, gliquidone, mitiglinide, tolbutamide, glipizide, glyburide, tolazamide, acetohexamide, chlorpropamide, gliclazide, glimepiride, repaglinide, nateglinide
0.191	8.785	0.00121	1418129_at	D	DHCR24	24-dehydrocholesterol reductase	Cytoplasm	enzyme
0.19	9.325	0.00266	1428555_at		SETD2	SET domain containing 2	Cytoplasm	enzyme
0.189	9.401	0.00139	1439240_x_at		LIN7B	lin-7 homolog B (C. elegans)	Cytoplasm	other
0.189	10.85	0.000935	1421836_at		MAP7	microtubule-associated protein 7	Cytoplasm	other
0.188	8.838	0.00232	1436471_at		RAB36	RAB36, member RAS oncogene family	Cytoplasm	enzyme
0.187	7.605	0.000986	1442171_at		PRPF40A	PRP40 pre-mRNA processing factor 40 homolog A (S. cerevisiae)	Nucleus	other
0.186	6.182	0.00143	1458582_at		LIN54	lin-54 homolog (C. elegans)	Nucleus	other
0.186	10.522	0.000567	1452439_s_at	D	SRSF2	serine/arginine-rich splicing factor 2	Nucleus	transcription regulator
0.185	10.499	0.00041	1447447_s_at	D	Srrm1	serine/arginine repetitive matrix 1	Nucleus	other
0.183	9.819	0.00184	1454872_at		B230308N11Rik	RIKEN cDNA B230308N11 gene	Other	other
0.183	7.821	0.000635	1437986_x_at		FUK	fucokinase	Other	kinase
0.182	8.927	0.000884	1448400_a_at		SMARCD2	SWI/SNF related, matrix associated, actin dependent regulator of chromatin, subfamily d, member 2	Nucleus	transcription regulator
0.182	8.457	0.00188	1419278_at		USP48	ubiquitin specific peptidase 48	Plasma Membrane	peptidase
0.18	8.205	0.00119	1420015_s_at		PPT1	palmitoyl-protein thioesterase 1	Cytoplasm	enzyme
0.178	7.864	0.00178	1438681_at		ALKBH1	alkB, alkylation repair homolog 1 (E. coli)	Cytoplasm	enzyme
0.177	6.554	0.000928	1437937_at		ACKR2	atypical chemokine receptor 2	Plasma Membrane	G-protein coupled receptor
0.177	10.221	0.000485	1452856_at		CREBZF	CREB/ATF bZIP transcription factor	Nucleus	transcription regulator
0.177	8.915	0.00262	1434753_at		NFRKB	nuclear factor related to kappaB binding protein	Nucleus	transcription regulator
0.173	9.034	0.00072	1452962_at		TMEM25	transmembrane protein 25	Extracellular Space	other
0.173	11.999	0.00301	1415764_at		ZC3H11A	zinc finger CCCH-type containing 11A	Nucleus	other
0.172	10.03	0.00144	1427269_at		SRSF11	serine/arginine-rich splicing factor 11	Nucleus	other
0.17	9.54	0.00142	1455328_at		ASIC1	acid-sensing (proton-gated) ion channel 1	Plasma Membrane	ion channel	amiloride, amiloride/hydrochlorothiazide
0.167	9.367	0.00107	1426239_s_at		ARRB2	arrestin, beta 2	Cytoplasm	other
0.167	10.639	0.00178	1416253_at		CDKN2D	cyclin-dependent kinase inhibitor 2D (p19, inhibits CDK4)	Cytoplasm	transcription regulator
0.167	11.834	0.00176	1417416_at		KCNA1	potassium voltage-gated channel, shaker-related subfamily, member 1 (episodic ataxia with myokymia)	Plasma Membrane	ion channel	dalfampridine
0.167	12.047	0.00227	1454652_at		Zranb2	zinc finger, RAN-binding domain containing 2	Nucleus	other
0.166	7.947	0.00181	1437385_at		CCBE1	collagen and calcium binding EGF domains 1	Extracellular Space	other
0.164	8.873	0.00294	1419429_at		CNTFR	ciliary neurotrophic factor receptor	Plasma Membrane	transmembrane receptor
0.164	10.255	0.0018	1428822_a_at		SNX24	sorting nexin 24	Other	transporter
0.164	10.031	0.00243	1422754_at		TMOD1	tropomodulin 1	Cytoplasm	enzyme
0.163	9.445	0.00117	1428169_at		ATG16L1	autophagy related 16-like 1 (S. cerevisiae)	Cytoplasm	other
0.163	9.711	0.00184	1454896_at		RBPJ	recombination signal binding protein for immunoglobulin kappa J region	Nucleus	transcription regulator
0.16	11.82	0.00219	1450069_a_at		CELF2	CUGBP, Elav-like family member 2	Nucleus	other
0.16	11.317	0.00269	1417872_at		FHL1	four and a half LIM domains 1	Cytoplasm	other
0.159	10.344	0.000634	1435684_at		ABCC5	ATP-binding cassette, sub-family C (CFTR/MRP), member 5	Plasma Membrane	transporter
0.159	11.714	0.00151	1437301_a_at		DVL1	dishevelled segment polarity protein 1	Cytoplasm	other
0.159	11.338	0.000965	1438682_at		PIK3R1	phosphoinositide-3-kinase, regulatory subunit 1 (alpha)	Cytoplasm	kinase
0.159	8.957	0.00148	1417291_at		TNFRSF1A	tumor necrosis factor receptor superfamily, member 1A	Plasma Membrane	transmembrane receptor
0.156	11.542	0.00241	1448568_a_at		SLC20A1	solute carrier family 20 (phosphate transporter), member 1	Plasma Membrane	transporter
0.15	8.696	0.00237	1433449_at		SNX32	sorting nexin 32	Other	other
0.146	8.397	0.00303	1435469_at		QSOX2	quiescin Q6 sulfhydryl oxidase 2	Other	enzyme
0.143	9.666	0.00286	1448619_at		DHCR7	7-dehydrocholesterol reductase	Cytoplasm	enzyme
-1.525	7.329	1.18e-05	1459372_at		NPAS4	neuronal PAS domain protein 4	Nucleus	transcription regulator
-1.215	7.026	0.000189	1427683_at		EGR2	early growth response 2	Nucleus	transcription regulator
-1.049	9.888	0.00227	1438796_at		NR4A3	nuclear receptor subfamily 4, group A, member 3	Nucleus	ligand-dependent nuclear receptor
-0.886	12.731	2.28e-05	1417065_at		EGR1	early growth response 1	Nucleus	transcription regulator
-0.809	10.776	0.00246	1415834_at		DUSP6	dual specificity phosphatase 6	Cytoplasm	phosphatase
-0.751	10.457	0.00113	1416505_at		NR4A1	nuclear receptor subfamily 4, group A, member 1	Nucleus	ligand-dependent nuclear receptor
-0.702	7.085	0.00012	1416805_at		FAM198B	family with sequence similarity 198, member B	Cytoplasm	other
-0.69	10.178	2.25e-06	1428142_at	D	ETV5	ets variant 5	Nucleus	transcription regulator
-0.656	7.296	0.000753	1422542_at		GPR34	G protein-coupled receptor 34	Plasma Membrane	other
-0.643	9.255	0.000905	1455085_at		1700086L19Rik	RIKEN cDNA 1700086L19 gene	Other	other
-0.628	8.335	0.00261	1428834_at		DUSP4	dual specificity phosphatase 4	Nucleus	phosphatase
-0.591	7.893	0.000371	1419663_at	D	OGN	osteoglycin	Extracellular Space	growth factor
-0.575	7.178	0.000189	1437433_at	D	B3GALT2	UDP-Gal:betaGlcNAc beta 1,3-galactosyltransferase, polypeptide 2	Cytoplasm	enzyme
-0.564	10.425	0.00103	1418047_at		NEUROD6	neuronal differentiation 6	Nucleus	other
-0.535	8.397	0.000176	1421768_a_at	D	HOMER1	homer homolog 1 (Drosophila)	Plasma Membrane	other
-0.533	9.558	0.00155	1457984_at		CRH	corticotropin releasing hormone	Extracellular Space	cytokine
-0.51	9.441	0.000766	1448673_at	D	PVRL3	poliovirus receptor-related 3	Plasma Membrane	other
-0.506	8.056	0.00183	1416318_at		SERPINB1	serpin peptidase inhibitor, clade B (ovalbumin), member 1	Cytoplasm	other
-0.502	8.139	0.000159	1429741_at	D	KCNV1	potassium channel, subfamily V, member 1	Plasma Membrane	ion channel
-0.498	8.86	0.00141	1456786_at	D	LDB2	LIM domain binding 2	Nucleus	transcription regulator
-0.497	7.203	0.000789	1438799_at		Dlx6os1	distal-less homeobox 6, opposite strand 1	Nucleus	other
-0.489	8.848	0.00105	1456084_x_at	D	FMOD	fibromodulin	Extracellular Space	other
-0.487	8.377	4.57e-05	1455607_at		RSPO3	R-spondin 3	Extracellular Space	kinase
-0.482	11.297	4.97e-06	1455225_at		SYNE1	spectrin repeat containing, nuclear envelope 1	Nucleus	other
-0.48	7.767	0.000113	1418754_at		ADCY8	adenylate cyclase 8 (brain)	Plasma Membrane	enzyme
-0.475	8.495	0.000643	1456637_at	D	LRRTM2	leucine rich repeat transmembrane neuronal 2	Plasma Membrane	other
-0.473	9.239	0.000109	1431724_a_at		P2RY12	purinergic receptor P2Y, G-protein coupled, 12	Plasma Membrane	G-protein coupled receptor	treprostinil, epoprostenol, prasugrel, ticagrelor, clopidogrel/telmisartan, ticlopidine, clopidogrel
-0.464	7.881	2.09e-05	1428642_at		SLC35D3	solute carrier family 35, member D3	Other	other
-0.463	8.922	0.000169	1448475_at		OLFML3	olfactomedin-like 3	Extracellular Space	other
-0.462	9.464	0.00108	1455925_at		PRDM8	PR domain containing 8	Nucleus	transcription regulator
-0.459	8.111	6.5e-05	1447100_s_at		C4orf32	chromosome 4 open reading frame 32	Other	other
-0.458	8.776	2.15e-05	1434993_at		BRINP3	bone morphogenetic protein/retinoic acid inducible neural-specific 3	Cytoplasm	other
-0.457	9.145	0.00285	1434759_at	D	LRRTM3	leucine rich repeat transmembrane neuronal 3	Other	other
-0.448	6.84	0.00107	1417164_at		DUSP10	dual specificity phosphatase 10	Nucleus	phosphatase
-0.447	8.464	0.000104	1421493_a_at	D	RGS20	regulator of G-protein signaling 20	Cytoplasm	other
-0.441	8.462	0.000374	1456336_at		CSRNP3	cysteine-serine-rich nuclear protein 3	Nucleus	transcription regulator
-0.439	7.403	0.00191	1441778_at		ADCYAP1	adenylate cyclase activating polypeptide 1 (pituitary)	Extracellular Space	other
-0.439	6.679	2.74e-05	1433681_x_at		CAPN3	calpain 3, (p94)	Cytoplasm	peptidase
-0.435	10.105	6.09e-05	1447863_s_at	D	NR4A2	nuclear receptor subfamily 4, group A, member 2	Nucleus	ligand-dependent nuclear receptor
-0.434	7.409	0.000258	1452343_at		LDLRAD4	low density lipoprotein receptor class A domain containing 4	Other	other
-0.43	9.83	0.00191	1418790_at		FEZF2	FEZ family zinc finger 2	Other	other
-0.419	7.526	9.48e-05	1438020_at		HAPLN1	hyaluronan and proteoglycan link protein 1	Extracellular Space	other
-0.419	8.456	0.000448	1457361_at	D	ZNF804A	zinc finger protein 804A	Other	other
-0.417	9.294	0.000222	1434925_at	D	LPPR5	lipid phosphate phosphatase-related protein type 5	Other	other
-0.413	8.392	9.68e-06	1442075_at		AI314604	expressed sequence AI314604	Other	other
-0.411	9.075	0.000377	1434572_at		HDAC9	histone deacetylase 9	Nucleus	transcription regulator	tributyrin, belinostat, pyroxamide, romidepsin, valproic acid
-0.408	8.497	0.000644	1429881_at	D	ARHGAP15	Rho GTPase activating protein 15	Cytoplasm	other
-0.407	10.5	0.000337	1415855_at	D	KITLG	KIT ligand	Extracellular Space	growth factor
-0.407	10.099	0.0015	1416846_a_at		PDZRN3	PDZ domain containing ring finger 3	Extracellular Space	enzyme
-0.406	9.794	0.000288	1434055_at		GALNT9	polypeptide N-acetylgalactosaminyltransferase 9	Cytoplasm	enzyme
-0.404	8.944	0.000475	1428484_at		OSBPL3	oxysterol binding protein-like 3	Cytoplasm	other
-0.401	8.468	0.000407	1436304_at		TMEM200A	transmembrane protein 200A	Other	other
-0.399	7.683	0.0011	1429197_s_at		RABGAP1L	RAB GTPase activating protein 1-like	Cytoplasm	other
-0.396	8.989	0.000513	1417677_at		OPN3	opsin 3	Plasma Membrane	G-protein coupled receptor
-0.39	9.729	0.000516	1430667_at		PCDH10	protocadherin 10	Plasma Membrane	other
-0.39	9.046	0.000341	1455430_at	D	Rbm33	RNA binding motif protein 33	Other	other
-0.382	9.316	0.00227	1422580_at		MYL4	myosin, light chain 4, alkali; atrial, embryonic	Cytoplasm	other
-0.38	8.445	0.000387	1451917_a_at		DCLK1	doublecortin-like kinase 1	Other	kinase
-0.374	9.113	0.00292	1441214_at		EXPH5	exophilin 5	Cytoplasm	other
-0.373	9.772	0.00305	1423420_at		ADRB1	adrenoceptor beta 1	Plasma Membrane	G-protein coupled receptor	articaine/epinephrine, bupivacaine/epinephrine, carteolol, dipivefrin, epinephrine/prilocaine, epinephrine/lidocaine, KUL 7211, myogane, practolol, nebivolol, bopindolol, latanoprost/timolol, bisoprolol/hydrochlorothiazide, isoprenaline, amiodarone, carvedilol, ephedrine, guanethidine, levalbuterol, propranolol, betaxolol, pindolol, esmolol, atenolol, bupranolol, metoprolol, alprenolol, dorzolami…
-0.372	7.411	0.00104	1456096_at		KIAA1456	KIAA1456	Other	other
-0.372	10.149	0.000128	1426450_at		PLCL2	phospholipase C-like 2	Cytoplasm	enzyme
-0.37	8.2	0.000118	1440204_at		3110039M20Rik	RIKEN cDNA 3110039M20 gene	Other	other
-0.37	8.018	0.00011	1427685_a_at	D	SYNJ2	synaptojanin 2	Cytoplasm	phosphatase
-0.369	10.338	0.000196	1433906_at		CLVS1	clavesin 1	Cytoplasm	other
-0.367	8.597	0.00157	1418365_at		CTSH	cathepsin H	Cytoplasm	peptidase
-0.364	8.055	0.000473	1426552_a_at		BCL11A	B-cell CLL/lymphoma 11A (zinc finger protein)	Nucleus	transcription regulator
-0.364	6.789	0.000421	1427606_at		USP27X	ubiquitin specific peptidase 27, X-linked	Other	peptidase
-0.363	9.599	0.00014	1419111_at		ING2	inhibitor of growth family, member 2	Nucleus	transcription regulator
-0.362	7.503	0.00181	1449533_at		TMEM100	transmembrane protein 100	Other	other
-0.361	8.5	2.74e-05	1419748_at		ABCD2	ATP-binding cassette, sub-family D (ALD), member 2	Cytoplasm	transporter
-0.36	8.34	0.000547	1449037_at	D	CREM	cAMP responsive element modulator	Nucleus	transcription regulator
-0.357	7.862	0.00073	1453860_s_at		NR3C1	nuclear receptor subfamily 3, group C, member 1 (glucocorticoid receptor)	Nucleus	ligand-dependent nuclear receptor	rimexolone, medrysone, clocortolone pivalate, diflorasone diacetate, fluorometholone, dexamethasone phosphate, cortisone acetate, halcinonide, flurandrenolide, desoximetasone, desonide, prednisolone, clobetasol propionate, fluocinolone acetonide, prednisone, hydrocortisone, triamcinolone, dexamethasone 21-acetate, 11beta hydrocortisone acetate, betamethasone, dexamethasone, budesonide, fluticason…
-0.357	9.749	0.00235	1416711_at		TBR1	T-box, brain, 1	Nucleus	transcription regulator
-0.356	6.775	0.00153	1455277_at		HHIP	hedgehog interacting protein	Plasma Membrane	other
-0.355	9.95	0.00074	1455862_at		UBTD2	ubiquitin domain containing 2	Other	other
-0.354	8.264	0.0002	1434477_at	D	HECA	headcase homolog (Drosophila)	Other	other
-0.353	7.064	0.000318	1450530_at	D	B3GALT1	UDP-Gal:betaGlcNAc beta 1,3-galactosyltransferase, polypeptide 1	Cytoplasm	enzyme
-0.351	8.625	0.000525	1418782_at		RXRG	retinoid X receptor, gamma	Nucleus	ligand-dependent nuclear receptor	etretinate, cytarabine/daunorubicin/tretinoin, idarubicin/mitoxantrone/tretinoin, arsenic trioxide/tretinoin, arsenic trioxide/daunorubicin/tretinoin, arsenic trioxide/gemtuzumab ozogamicin/tretinoin, daunorubicin/tretinoin, idarubicin/tretinoin, doxorubicin/tretinoin, arsenic trioxide/idarubicin/tretinoin, bexarotene, adapalene, acitretin, tretinoin, alitretinoin
-0.35	9.492	0.000132	1454784_at	D	HS3ST2	heparan sulfate (glucosamine) 3-O-sulfotransferase 2	Cytoplasm	enzyme
-0.35	8.763	2.74e-05	1417110_at	D	MAN1A1	mannosidase, alpha, class 1A, member 1	Cytoplasm	enzyme
-0.35	8.777	5.55e-05	1451344_at		TMEM119	transmembrane protein 119	Cytoplasm	other
-0.349	7.618	0.00211	1454720_at		HS3ST5	heparan sulfate (glucosamine) 3-O-sulfotransferase 5	Cytoplasm	enzyme
-0.347	7.115	0.00133	1434447_at		MET	met proto-oncogene	Plasma Membrane	kinase	crizotinib, tivantinib, cabozantinib, INC280, cabozantinib/erlotinib
-0.347	10.439	3.4e-05	1456283_at	D	NETO1	neuropilin (NRP) and tolloid (TLL)-like 1	Extracellular Space	other
-0.346	9.214	0.000396	1433885_at		IQGAP2	IQ motif containing GTPase activating protein 2	Cytoplasm	other
-0.345	7.342	0.00262	1419425_at		CNR1	cannabinoid receptor 1 (brain)	Plasma Membrane	G-protein coupled receptor	trans-(±)-nabilone, SLV 319, rimonabant, BAY 38-7271, delta-8-tetrahydrocannabinol, delta-9-tetrahydrocannabinol
-0.345	6.97	0.00119	1450967_at		PTPLAD2	protein tyrosine phosphatase-like A domain containing 2	Other	other
-0.345	9.966	0.00305	1436584_at		SPRY2	sprouty homolog 2 (Drosophila)	Plasma Membrane	other
-0.344	7.479	0.000639	1429224_at		PNMA1	paraneoplastic Ma antigen 1	Nucleus	other
-0.344	6.548	0.000267	1425650_at	D	TLE4	transducin-like enhancer of split 4	Nucleus	transcription regulator
-0.341	6.996	0.00151	1454015_a_at		CDH13	cadherin 13	Plasma Membrane	other
-0.339	9.587	0.00153	1420537_at		KCTD4	potassium channel tetramerization domain containing 4	Other	ion channel
-0.339	8.751	0.00165	1454729_at		TMEM108	transmembrane protein 108	Other	other
-0.335	6.854	0.000274	1437122_at	D	BCL2	B-cell CLL/lymphoma 2	Cytoplasm	transporter	oblimersen, rasagiline, (-)-gossypol, gemcitabine/paclitaxel, bortezomib/paclitaxel, paclitaxel/trastuzumab, paclitaxel/pertuzumab/trastuzumab, lapatinib/paclitaxel, doxorubicin/paclitaxel, epirubicin/paclitaxel, paclitaxel
-0.334	7.318	0.00123	1422716_a_at		ACP1	acid phosphatase 1, soluble	Cytoplasm	phosphatase
-0.334	8.992	0.000229	1418370_at		TNNC1	troponin C type 1 (slow)	Cytoplasm	other	levosimendan, Ca2+
-0.332	6.96	0.000218	1447967_at		TMEM69	transmembrane protein 69	Other	other
-0.331	7.067	0.00023	1430701_a_at		MSANTD3	Myb/SANT-like DNA-binding domain containing 3	Other	other
-0.33	7.682	0.00166	1428345_at	D	PPAPDC2	phosphatidic acid phosphatase type 2 domain containing 2	Other	phosphatase
-0.328	7.529	0.000174	1421199_at	D	DLG2	discs, large homolog 2 (Drosophila)	Plasma Membrane	kinase
-0.328	9.521	0.00213	1438565_at	D	KIAA1107	KIAA1107	Other	other
-0.327	9.202	5.9e-05	1438451_at		ARHGAP32	Rho GTPase activating protein 32	Cytoplasm	other
-0.327	9.666	0.000114	1421141_a_at	D	Foxp1	forkhead box P1	Nucleus	transcription regulator
-0.327	8.264	0.00139	1416321_s_at		PRELP	proline/arginine-rich end leucine-rich repeat protein	Extracellular Space	other
-0.327	8.344	0.00143	1455535_at	D	SOX5	SRY (sex determining region Y)-box 5	Nucleus	transcription regulator
-0.326	6.412	0.000367	1436904_at		MED13	mediator complex subunit 13	Nucleus	transcription regulator
-0.326	7.88	0.00162	1456946_at		SH3RF3	SH3 domain containing ring finger 3	Other	other
-0.325	9.239	0.000843	1435747_at		FGF14	fibroblast growth factor 14	Extracellular Space	growth factor
-0.325	5.902	0.0012	1444402_at		ZC3H12C	zinc finger CCCH-type containing 12C	Other	other
-0.324	6.624	0.000104	1455557_at		Gm17750	predicted gene, 17750	Other	other
-0.323	9.803	0.000464	1450020_at		CX3CR1	chemokine (C-X3-C motif) receptor 1	Plasma Membrane	G-protein coupled receptor
-0.323	6.515	0.00153	1427115_at		MYH3	myosin, heavy chain 3, skeletal muscle, embryonic	Cytoplasm	enzyme
-0.321	9.034	4.24e-05	1431510_s_at		CMC1	C-x(9)-C motif containing 1	Cytoplasm	other
-0.32	9.032	0.000574	1453485_s_at		METTL23	methyltransferase like 23	Other	other
-0.317	9.695	0.000779	1435854_at		OPALIN	oligodendrocytic myelin paranodal and inner loop protein	Cytoplasm	other
-0.317	7.151	0.00285	1449391_at		ZFP37	ZFP37 zinc finger protein	Nucleus	transcription regulator
-0.315	7.708	0.00203	1452365_at		CSGALNACT1	chondroitin sulfate N-acetylgalactosaminyltransferase 1	Cytoplasm	enzyme
-0.315	7.506	0.00219	1435606_at		GPC2	glypican 2	Plasma Membrane	other
-0.311	7.778	0.00246	1424602_s_at		XRCC4	X-ray repair complementing defective repair in Chinese hamster cells 4	Nucleus	other
-0.31	9.347	0.000912	1458129_at		RORA	RAR-related orphan receptor A	Nucleus	ligand-dependent nuclear receptor
-0.309	9.23	0.000662	1442019_at		GAS7	growth arrest-specific 7	Cytoplasm	transcription regulator
-0.309	9.993	0.00149	1454687_at		LRFN5	leucine rich repeat and fibronectin type III domain containing 5	Nucleus	other
-0.308	7.768	0.000239	1433491_at		EPB41L2	erythrocyte membrane protein band 4.1-like 2	Plasma Membrane	other
-0.306	10.616	0.000865	1437069_at		OSBPL8	oxysterol binding protein-like 8	Plasma Membrane	other
-0.305	10.077	0.00229	1426964_at		ABRACL	ABRA C-terminal like	Other	other
-0.305	9.898	6.52e-05	1438989_s_at	D	B130021B11Rik	RIKEN cDNA B130021B11 gene	Other	other
-0.305	8.562	0.00122	1438729_at		SOX1	SRY (sex determining region Y)-box 1	Nucleus	transcription regulator
-0.303	8.742	0.00132	1421328_at		MAP2	microtubule-associated protein 2	Plasma Membrane	other	estramustine
-0.302	6.213	0.00188	1447996_at		PTCHD1	patched domain containing 1	Plasma Membrane	other
-0.3	9.047	0.000918	1423668_at	D	ZDHHC14	zinc finger, DHHC-type containing 14	Cytoplasm	enzyme
-0.299	9.912	0.000146	1453260_a_at		PPP2R2A	protein phosphatase 2, regulatory subunit B, alpha	Cytoplasm	phosphatase
-0.298	10.041	0.00023	1457092_at		FAM19A1	family with sequence similarity 19 (chemokine (C-C motif)-like), member A1	Extracellular Space	other
-0.298	7.965	0.000155	1420847_a_at		FGFR2	fibroblast growth factor receptor 2	Plasma Membrane	kinase	regorafenib, dexamethasone/thalidomide, bortezomib/dexamethasone/thalidomide, rituximab/thalidomide, bortezomib/thalidomide, prednisone/thalidomide, thalidomide, palifermin
-0.296	8.613	0.00128	1425660_at		BTBD3	BTB (POZ) domain containing 3	Other	other
-0.296	11.14	0.000744	1422018_at	D	HIVEP2	human immunodeficiency virus type I enhancer binding protein 2	Nucleus	transcription regulator
-0.293	9.234	0.000808	1451769_s_at		PCDHA4	protocadherin alpha 4	Plasma Membrane	other
-0.293	11.64	5.91e-05	1416287_at	D	RGS4	regulator of G-protein signaling 4	Cytoplasm	other
-0.289	5.948	0.000197	1458388_at		CCDC110	coiled-coil domain containing 110	Nucleus	other
-0.289	9.729	7.43e-05	1438407_at		DSEL	dermatan sulfate epimerase-like	Extracellular Space	enzyme
-0.289	8.913	0.000291	1426622_a_at		QPCT	glutaminyl-peptide cyclotransferase	Cytoplasm	enzyme
-0.288	8.909	0.000119	1436895_at	D	ARAP2	ArfGAP with RhoGAP domain, ankyrin repeat and PH domain 2	Cytoplasm	other
-0.287	7.358	0.00184	1441936_x_at		4930447M23Rik	RIKEN cDNA 4930447M23 gene	Other	other
-0.287	8.085	8.21e-05	1435852_at		SPRED3	sprouty-related, EVH1 domain containing 3	Extracellular Space	cytokine
-0.285	9.801	0.000266	1418929_at		IFT57	intraflagellar transport 57 homolog (Chlamydomonas)	Cytoplasm	other
-0.285	10.679	0.00204	1433575_at		SOX4	SRY (sex determining region Y)-box 4	Nucleus	transcription regulator
-0.283	9.126	0.00129	1455893_at		RSPO2	R-spondin 2	Extracellular Space	other
-0.283	8.422	0.00198	1453386_at		TUSC1	tumor suppressor candidate 1	Other	other
-0.282	10.708	0.00226	1452065_at		VSTM2A	V-set and transmembrane domain containing 2A	Extracellular Space	other
-0.281	6.8	4.48e-05	1434090_at		DIS3L2	DIS3 like 3'-5' exoribonuclease 2	Cytoplasm	enzyme
-0.281	8.485	0.00045	1448922_at		DUSP19	dual specificity phosphatase 19	Cytoplasm	phosphatase
-0.281	8.759	2.54e-05	1426343_at		STT3B	STT3B, subunit of the oligosaccharyltransferase complex (catalytic)	Cytoplasm	enzyme
-0.279	8.361	0.000744	1425573_a_at	D	ASAP1	ArfGAP with SH3 domain, ankyrin repeat and PH domain 1	Plasma Membrane	other
-0.278	8.549	0.000274	1454721_at		AREL1	apoptosis resistant E3 ubiquitin protein ligase 1	Cytoplasm	enzyme
-0.277	7.911	0.00233	1433518_at		LCMT2	leucine carboxyl methyltransferase 2	Other	enzyme
-0.277	9.477	0.000863	1434184_s_at		MAP4K4	mitogen-activated protein kinase kinase kinase kinase 4	Cytoplasm	kinase
-0.277	9.084	0.00257	1438026_at		ZNF560	zinc finger protein 560	Nucleus	transcription regulator
-0.276	11.581	0.00285	1439618_at		PDE10A	phosphodiesterase 10A	Cytoplasm	enzyme	aspirin/dipyridamole/telmisartan, triflusal, dipyridamole, aspirin/dipyridamole
-0.275	9.692	0.000156	1420416_at		SEMA3A	sema domain, immunoglobulin domain (Ig), short basic domain, secreted, (semaphorin) 3A	Extracellular Space	other
-0.273	5.899	0.000187	1429891_at		CAPSL	calcyphosine-like	Other	other
-0.272	7.712	0.000167	1449192_at		ATF7IP	activating transcription factor 7 interacting protein	Nucleus	transcription regulator
-0.272	7.069	0.000823	1460257_a_at		MTHFS	5,10-methenyltetrahydrofolate synthetase (5-formyltetrahydrofolate cyclo-ligase)	Cytoplasm	enzyme
-0.271	10.301	0.00021	1436309_at		NETO2	neuropilin (NRP) and tolloid (TLL)-like 2	Plasma Membrane	other
-0.27	10.055	0.000541	1427510_at		GNAI1	guanine nucleotide binding protein (G protein), alpha inhibiting activity polypeptide 1	Plasma Membrane	enzyme
-0.27	11.071	0.00156	1428535_at		KIAA1462	KIAA1462	Plasma Membrane	other
-0.269	9.72	0.00212	1417604_at		CAMK1	calcium/calmodulin-dependent protein kinase I	Cytoplasm	kinase
-0.269	7.771	0.000686	1421350_a_at		GRIP1	glutamate receptor interacting protein 1	Plasma Membrane	transcription regulator
-0.268	7.563	0.000771	1421324_a_at		AKT2	v-akt murine thymoma viral oncogene homolog 2	Cytoplasm	kinase	enzastaurin
-0.268	11.587	0.000171	1423608_at	D	ITM2A	integral membrane protein 2A	Plasma Membrane	other
-0.267	8.891	0.000169	1453172_at		HSPA13	heat shock protein 70kDa family, member 13	Cytoplasm	other
-0.266	7.247	0.00123	1425164_a_at		PHKG1	phosphorylase kinase, gamma 1 (muscle)	Cytoplasm	kinase
-0.263	7.348	0.00176	1418459_at		CCDC91	coiled-coil domain containing 91	Other	other
-0.263	9.187	0.000761	1426047_a_at		PTPRR	protein tyrosine phosphatase, receptor type, R	Plasma Membrane	phosphatase
-0.263	7.626	0.000275	1457704_at	D	ZNF385B	zinc finger protein 385B	Nucleus	other
-0.262	10.181	0.000552	1443960_at		ASRGL1	asparaginase like 1	Cytoplasm	enzyme
-0.262	9.285	0.000214	1422603_at		RNASE4	ribonuclease, RNase A family, 4	Extracellular Space	enzyme
-0.262	9.938	0.000134	1442226_at	D	SEMA3E	sema domain, immunoglobulin domain (Ig), short basic domain, secreted, (semaphorin) 3E	Extracellular Space	other
-0.261	9.544	0.00142	1420954_a_at		ADD1	adducin 1 (alpha)	Cytoplasm	other
-0.261	9.595	0.000284	1423137_at		RALA	v-ral simian leukemia viral oncogene homolog A (ras related)	Cytoplasm	enzyme
-0.26	11.56	0.000288	1438578_a_at		BTBD10	BTB (POZ) domain containing 10	Other	ion channel
-0.26	8.753	0.000432	1416619_at		C10orf54	chromosome 10 open reading frame 54	Plasma Membrane	other
-0.26	8.556	0.000394	1417412_at		F8A1 (includes others)	coagulation factor VIII-associated 1	Nucleus	other
-0.259	11.889	0.000633	1451280_at		ARPP21	cAMP-regulated phosphoprotein, 21kDa	Cytoplasm	other
-0.259	8.988	0.00206	1439078_at		KLHL4	kelch-like family member 4	Cytoplasm	other
-0.258	6.495	0.000151	1437669_x_at		ACKR4	atypical chemokine receptor 4	Plasma Membrane	G-protein coupled receptor
-0.258	8.148	0.000448	1420938_at		HS6ST2	heparan sulfate 6-O-sulfotransferase 2	Plasma Membrane	enzyme
-0.258	10.091	0.00183	1449855_s_at		UCHL3	ubiquitin carboxyl-terminal esterase L3 (ubiquitin thiolesterase)	Cytoplasm	peptidase
-0.256	8.752	0.00298	1426782_at		GPR125	G protein-coupled receptor 125	Plasma Membrane	G-protein coupled receptor
-0.256	8.178	0.000112	1422117_s_at		KHDRBS2	KH domain containing, RNA binding, signal transduction associated 2	Nucleus	other
-0.256	7.124	0.000151	1452817_at		SMYD3	SET and MYND domain containing 3	Nucleus	enzyme
-0.256	8.576	0.00281	1453742_at		VPS33A	vacuolar protein sorting 33 homolog A (S. cerevisiae)	Cytoplasm	transporter
-0.254	11.145	0.00135	1435678_at		Pou3f3os	POU domain, class 3, transcription factor 3, opposite strand	Other	other
-0.253	11.69	0.00126	1437201_at		LRRC4C	leucine rich repeat containing 4C	Plasma Membrane	other
-0.252	9.367	0.00271	1455269_a_at	D	CORO1A	coronin, actin binding protein, 1A	Cytoplasm	other
-0.251	9.211	0.000207	1429111_at		TLN2	talin 2	Nucleus	other
-0.25	8.678	0.000481	1443612_at		ANO3	anoctamin 3	Plasma Membrane	transporter
-0.25	9.352	0.000736	1450728_at	D	FJX1	four jointed box 1 (Drosophila)	Extracellular Space	other
-0.25	9.779	0.000185	1435285_at	D	MPPED2	metallophosphoesterase domain containing 2	Other	other
-0.25	10.556	0.000734	1423648_at		PDIA6	protein disulfide isomerase family A, member 6	Cytoplasm	enzyme
-0.248	7.688	0.000628	1444174_at		Gm10700	predicted gene 10700	Other	other
-0.247	8.629	0.000208	1428574_a_at		CHN2	chimerin 2	Cytoplasm	other
-0.247	7.905	0.00301	1449502_at		DAZ2	deleted in azoospermia 2	Cytoplasm	translation regulator
-0.247	10.037	0.00114	1415743_at		HDAC5	histone deacetylase 5	Nucleus	transcription regulator	tributyrin, belinostat, pyroxamide, romidepsin
-0.246	8.038	0.00192	1415801_at		GJA1	gap junction protein, alpha 1, 43kDa	Plasma Membrane	transporter
-0.246	7.639	0.00071	1416584_at		MAN2B2	mannosidase, alpha, class 2B, member 2	Cytoplasm	enzyme
-0.246	10.804	0.000165	1450839_at		NREP	neuronal regeneration related protein	Cytoplasm	other
-0.246	7.466	0.0013	1455123_at		ST18	suppression of tumorigenicity 18, zinc finger	Nucleus	transcription regulator
-0.246	9.292	0.000866	1426411_a_at	D	STRBP	spermatid perinuclear RNA binding protein	Cytoplasm	other
-0.246	7.014	0.000807	1435236_at		TCEANC	transcription elongation factor A (SII) N-terminal and central domain containing	Other	other
-0.246	11.942	0.00289	1436094_at		VGF	VGF nerve growth factor inducible	Extracellular Space	growth factor
-0.245	10.53	0.00204	1426870_at	D	FBXO33	F-box protein 33	Other	other
-0.245	9.094	0.000979	1452123_s_at		FRMD4B	FERM domain containing 4B	Cytoplasm	other
-0.245	9.452	0.000682	1451021_a_at		KLF5	Kruppel-like factor 5 (intestinal)	Nucleus	transcription regulator
-0.244	7.891	0.00088	1430991_at		1810014B01Rik	RIKEN cDNA 1810014B01 gene	Other	other
-0.244	9.991	0.00139	1450042_at		ARX	aristaless related homeobox	Nucleus	transcription regulator
-0.244	7.858	9e-05	1423953_at		CDKAL1	CDK5 regulatory subunit associated protein 1-like 1	Cytoplasm	other
-0.244	7.994	0.000197	1421530_a_at		GRM8	glutamate receptor, metabotropic 8	Plasma Membrane	G-protein coupled receptor	fasoracetam
-0.244	8.651	0.00247	1451454_at	D	PCDH20	protocadherin 20	Other	other
-0.244	8.14	0.00128	1431592_a_at	D	SH3KBP1	SH3-domain kinase binding protein 1	Cytoplasm	other
-0.243	8.717	0.00194	1456516_x_at		UAP1	UDP-N-acteylglucosamine pyrophosphorylase 1	Nucleus	enzyme
-0.242	8.139	0.00104	1460333_at		DDX59	DEAD (Asp-Glu-Ala-Asp) box polypeptide 59	Other	enzyme
-0.242	8.793	0.0014	1440928_at		TBC1D32	TBC1 domain family, member 32	Other	other
-0.241	8.45	0.00159	1415936_at		BCAR3	breast cancer anti-estrogen resistance 3	Cytoplasm	other
-0.241	8.857	0.000851	1421947_at		GNG12	guanine nucleotide binding protein (G protein), gamma 12	Plasma Membrane	enzyme
-0.241	10.301	0.000953	1420895_at		TGFBR1	transforming growth factor, beta receptor 1	Plasma Membrane	kinase
-0.24	6.955	0.00101	1417566_at		ABHD5	abhydrolase domain containing 5	Cytoplasm	enzyme
-0.24	7.612	0.000281	1448456_at		CLN8	ceroid-lipofuscinosis, neuronal 8 (epilepsy, progressive with mental retardation)	Cytoplasm	other
-0.24	8.3	0.00187	1458932_at		PEX5L	peroxisomal biogenesis factor 5-like	Cytoplasm	ion channel
-0.24	9.257	0.000138	1426657_s_at	D	PHGDH	phosphoglycerate dehydrogenase	Cytoplasm	enzyme
-0.239	9.999	0.000287	1420679_a_at		AIG1	androgen-induced 1	Other	other
-0.239	9.176	0.000797	1422740_at	D	TNFRSF21	tumor necrosis factor receptor superfamily, member 21	Plasma Membrane	transmembrane receptor
-0.238	7.594	0.00127	1425272_at		EMP2	epithelial membrane protein 2	Plasma Membrane	other
-0.238	9.699	0.000583	1449089_at		NRIP1	nuclear receptor interacting protein 1	Nucleus	transcription regulator
-0.237	9.658	0.000763	1422518_at		CASK	calcium/calmodulin-dependent serine protein kinase (MAGUK family)	Plasma Membrane	kinase
-0.237	7.504	0.000143	1455658_at		CGGBP1	CGG triplet repeat binding protein 1	Nucleus	other
-0.237	10.832	0.00299	1423321_at	D	MYADM	myeloid-associated differentiation marker	Nucleus	other
-0.237	9.847	0.00125	1448945_at		PLLP	plasmolipin	Plasma Membrane	transporter
-0.236	9.355	0.000388	1429351_at		KLHL24	kelch-like family member 24	Other	other
-0.235	8.969	0.000691	1419250_a_at		CDK14	cyclin-dependent kinase 14	Nucleus	kinase
-0.235	7.184	0.00138	1425301_at		NCAM2	neural cell adhesion molecule 2	Plasma Membrane	other
-0.234	7.111	0.00251	1448060_at		SEMA6D	sema domain, transmembrane domain (TM), and cytoplasmic domain, (semaphorin) 6D	Plasma Membrane	other
-0.233	8.052	0.00136	1442032_at		BC030500	cDNA sequence BC030500	Other	other
-0.232	7.962	0.000575	1433774_x_at		COG1	component of oligomeric golgi complex 1	Cytoplasm	transporter
-0.232	7.918	0.00228	1424259_at		LMF1	lipase maturation factor 1	Cytoplasm	other
-0.232	9.099	0.00147	1415673_at		PSPH	phosphoserine phosphatase	Cytoplasm	phosphatase
-0.232	9.352	0.00104	1449127_at		SELPLG	selectin P ligand	Plasma Membrane	other
-0.232	9.146	0.00124	1455213_at		Tmsb4x (includes others)	thymosin, beta 4, X chromosome	Cytoplasm	other
-0.232	8.676	0.00138	1451033_a_at		TRPC4	transient receptor potential cation channel, subfamily C, member 4	Plasma Membrane	ion channel
-0.231	10.588	0.000286	1419873_s_at	D	CSF1R	colony stimulating factor 1 receptor	Plasma Membrane	kinase	nilotinib, sunitinib, pazopanib
-0.231	9.253	0.00135	1451524_at		FBXW2	F-box and WD repeat domain containing 2	Cytoplasm	enzyme
-0.231	6.62	0.000677	1458408_at		SAMD8	sterile alpha motif domain containing 8	Cytoplasm	other
-0.23	9.139	0.000736	1428751_at		PACRG	PARK2 co-regulated	Nucleus	other
-0.229	11.469	0.00139	1450928_at	D	ID4	inhibitor of DNA binding 4, dominant negative helix-loop-helix protein	Nucleus	transcription regulator
-0.229	8.826	0.00193	1434050_at		VPS8	vacuolar protein sorting 8 homolog (S. cerevisiae)	Other	other
-0.228	8.708	0.00156	1426701_at		FAM160A2	family with sequence similarity 160, member A2	Cytoplasm	other
-0.228	9.649	0.00231	1421190_at		GABRB3	gamma-aminobutyric acid (GABA) A receptor, beta 3	Plasma Membrane	ion channel	methohexital, aspirin/butalbital/caffeine, aspirin/butalbital/caffeine/codeine, fospropofol, pagoclone, alphadolone, SEP 174559, nitrazepam, adinazolam, piperazine, acetaminophen/butalbital/caffeine, sevoflurane, isoflurane, gaboxadol, isoniazid, felbamate, etomidate, muscimol, halothane, fluoxetine/olanzapine, amobarbital, estazolam, atropine/hyoscyamine/phenobarbital/scopolamine, acetaminophen/…
-0.228	9.025	0.00192	1435674_at		RHOBTB2	Rho-related BTB domain containing 2	Other	enzyme
-0.227	8.01	0.00114	1424080_at		DCPS	decapping enzyme, scavenger	Nucleus	enzyme
-0.227	7.407	0.00168	1419382_a_at		DHRS4	dehydrogenase/reductase (SDR family) member 4	Cytoplasm	enzyme
-0.226	8.681	0.000746	1455008_at		GNA12	guanine nucleotide binding protein (G protein) alpha 12	Plasma Membrane	enzyme
-0.226	10.494	0.00176	1425898_x_at		OLFM3	olfactomedin 3	Cytoplasm	other
-0.226	8.263	0.00305	1460390_at		SORL1	sortilin-related receptor, L(DLR class) A repeats containing	Cytoplasm	transporter
-0.225	7.286	0.000359	1422014_at		Foxp2	forkhead box P2	Nucleus	transcription regulator
-0.225	11.249	0.00186	1417279_at		ITPR1	inositol 1,4,5-trisphosphate receptor, type 1	Cytoplasm	ion channel
-0.224	8.355	0.000713	1449351_s_at		PDGFC	platelet derived growth factor C	Extracellular Space	growth factor
-0.224	8.884	0.00137	1427243_at		RELL1	RELT-like 1	Other	other
-0.223	10.181	0.00105	1426300_at	D	ALCAM	activated leukocyte cell adhesion molecule	Plasma Membrane	other
-0.223	10.396	0.000443	1450193_at		HCN1	hyperpolarization activated cyclic nucleotide-gated potassium channel 1	Plasma Membrane	ion channel
-0.223	8.204	0.000803	1432478_a_at		RNF19B	ring finger protein 19B	Cytoplasm	other
-0.223	9.562	0.000562	1460362_at		RTFDC1	replication termination factor 2 domain containing 1	Other	other
-0.223	5.849	0.000758	1437249_at		SKAP1	src kinase associated phosphoprotein 1	Cytoplasm	kinase
-0.223	9.792	0.00169	1429475_at		UBASH3B	ubiquitin associated and SH3 domain containing B	Other	enzyme
-0.223	8.637	0.000285	1419385_a_at		UBQLN1	ubiquilin 1	Cytoplasm	other
-0.222	8.068	0.000534	1424212_at		ATG101	autophagy related 101	Other	other
-0.222	8.016	0.000931	1434963_at		SUPT3H	suppressor of Ty 3 homolog (S. cerevisiae)	Nucleus	transcription regulator
-0.222	8.687	0.00246	1426427_at		TTLL1	tubulin tyrosine ligase-like family, member 1	Extracellular Space	enzyme
-0.221	9.157	0.000447	1429078_a_at		COPS7A	COP9 signalosome subunit 7A	Cytoplasm	other
-0.221	9.824	0.0024	1435229_at		GRAMD1B	GRAM domain containing 1B	Other	other
-0.221	8.712	0.000331	1431644_a_at		ICA1	islet cell autoantigen 1, 69kDa	Cytoplasm	other
-0.221	10.697	0.000142	1416503_at		LXN	latexin	Cytoplasm	other
-0.221	8.815	0.00128	1420977_at		MAN1A2	mannosidase, alpha, class 1A, member 2	Cytoplasm	enzyme
-0.22	9.97	0.000137	1422686_s_at		EXOC4	exocyst complex component 4	Cytoplasm	transporter
-0.22	8.461	0.00297	1428900_s_at		METTL15	methyltransferase like 15	Other	other
-0.22	5.587	0.00203	1431352_s_at		PVT1	Pvt1 oncogene (non-protein coding)	Other	other
-0.22	5.49	0.00197	1438332_at		SLC22A6	solute carrier family 22 (organic anion transporter), member 6	Plasma Membrane	transporter	colchicine/probenecid, probenecid
-0.219	11.152	0.000663	1422834_at	D	KCND2	potassium voltage-gated channel, Shal-related subfamily, member 2	Plasma Membrane	ion channel	dalfampridine
-0.219	9.635	0.000217	1422554_at		NDNL2	necdin-like 2	Nucleus	other
-0.219	8.624	0.00234	1437434_a_at		WLS	wntless Wnt ligand secretion mediator	Cytoplasm	other
-0.218	7.96	0.000481	1452935_at		C15orf65	chromosome 15 open reading frame 65	Other	other
-0.218	10.339	0.000413	1448139_at		MLC1	megalencephalic leukoencephalopathy with subcortical cysts 1	Plasma Membrane	transporter
-0.217	8.72	0.00122	1460575_at		EIF2A	eukaryotic translation initiation factor 2A, 65kDa	Cytoplasm	translation regulator
-0.217	9.791	0.00181	1437171_x_at		GSN	gelsolin	Extracellular Space	other
-0.217	8.898	0.000193	1417534_at	D	ITGB5	integrin, beta 5	Plasma Membrane	other	cilengitide
-0.217	8.634	0.000532	1449100_at		PARD6A	par-6 family cell polarity regulator alpha	Plasma Membrane	other
-0.217	8.11	0.00188	1451996_at		TM2D1	TM2 domain containing 1	Plasma Membrane	G-protein coupled receptor
-0.216	9.281	0.000981	1449107_at		NUDT4	nudix (nucleoside diphosphate linked moiety X)-type motif 4	Cytoplasm	phosphatase
-0.215	8.582	0.00182	1449839_at		CASP3	caspase 3, apoptosis-related cysteine peptidase	Cytoplasm	peptidase	emricasan
-0.215	8.054	0.000135	1424528_at	D	CGREF1	cell growth regulator with EF-hand domain 1	Extracellular Space	other
-0.215	8.852	0.00205	1448746_at		NBN	nibrin	Nucleus	other
-0.215	9.213	0.00223	1455824_x_at		STT3A	STT3A, subunit of the oligosaccharyltransferase complex (catalytic)	Plasma Membrane	enzyme
-0.215	10.291	0.000219	1452648_at		TBRG1	transforming growth factor beta regulator 1	Nucleus	other
-0.214	9.275	0.000805	1434750_at		EXOC3	exocyst complex component 3	Plasma Membrane	transporter
-0.213	9.76	0.00222	1451381_at		AAMDC	adipogenesis associated, Mth938 domain containing	Cytoplasm	other
-0.213	7.706	0.000277	1417987_at		BTD	biotinidase	Extracellular Space	enzyme
-0.213	6.843	0.00154	1419397_at		POLA1	polymerase (DNA directed), alpha 1, catalytic subunit	Nucleus	enzyme	nelarabine, MB07133, cytarabine/fludarabine phosphate, cytarabine/daunorubicin, bortezomib/cladribine/rituximab, cyclophosphamide/fludarabine phosphate/rituximab, cladribine/cytarabine/daunorubicin, cytarabine/etoposide, cytarabine/etoposide/mitoxantrone, cytarabine/dexamethasone, cytarabine/mitoxantrone, cyclophosphamide/cytarabine/6-mercaptopurine, cladribine/cytarabine/filgrastim, clofarabine/…
-0.213	10.045	0.0025	1427261_at		WWC1	WW and C2 domain containing 1	Cytoplasm	transcription regulator
-0.212	9.686	0.00189	1454766_at		AMN1	antagonist of mitotic exit network 1 homolog (S. cerevisiae)	Plasma Membrane	other
-0.212	11.494	0.0022	1416923_a_at		BNIP3L	BCL2/adenovirus E1B 19kDa interacting protein 3-like	Cytoplasm	other
-0.212	7.915	0.00095	1430640_a_at		PRKAR2B	protein kinase, cAMP-dependent, regulatory, type II, beta	Cytoplasm	kinase
-0.211	8.154	0.00113	1438473_at		ARL15	ADP-ribosylation factor-like 15	Cytoplasm	other
-0.211	6.985	0.00155	1416886_at		C1D	C1D nuclear receptor corepressor	Nucleus	transcription regulator
-0.211	8.465	0.000586	1449267_at		CHID1	chitinase domain containing 1	Extracellular Space	other
-0.211	6.861	0.00162	1450480_a_at		GRK6	G protein-coupled receptor kinase 6	Plasma Membrane	kinase
-0.211	9.843	0.000835	1428495_at		MALSU1	mitochondrial assembly of ribosomal large subunit 1	Extracellular Space	other
-0.211	10.091	0.000915	1433895_at		TMEM127	transmembrane protein 127	Other	other
-0.21	7.208	0.00108	1426753_at		JADE1	jade family PHD finger 1	Nucleus	other
-0.209	9.041	0.00133	1454818_at		GMEB2	glucocorticoid modulatory element binding protein 2	Nucleus	transcription regulator
-0.209	9.889	0.00113	1434786_at		Ppp1r12b	protein phosphatase 1, regulatory (inhibitor) subunit 12B	Cytoplasm	other
-0.209	8.067	0.00252	1438549_a_at		SRR	serine racemase	Cytoplasm	enzyme
-0.209	11.055	0.00159	1420878_a_at		YWHAB	tyrosine 3-monooxygenase/tryptophan 5-monooxygenase activation protein, beta	Cytoplasm	transcription regulator
-0.208	10.252	0.00138	1422669_at		EBAG9	estrogen receptor binding site associated, antigen, 9	Cytoplasm	other
-0.208	8.65	0.000707	1417287_at		HM13	histocompatibility (minor) 13	Cytoplasm	peptidase
-0.207	8.467	0.000396	1427070_at		SNX21	sorting nexin family member 21	Other	transporter
-0.207	10.29	0.000345	1436747_at		UBALD2	UBA-like domain containing 2	Other	other
-0.206	9.013	0.00198	1419470_at	D	GNB4	guanine nucleotide binding protein (G protein), beta polypeptide 4	Plasma Membrane	enzyme
-0.206	9.215	0.00199	1451248_at		PRMT7	protein arginine methyltransferase 7	Cytoplasm	enzyme
-0.206	10.637	0.00104	1425682_a_at		TPRKB	TP53RK binding protein	Cytoplasm	other
-0.205	9.734	0.00183	1451223_a_at		BTF3L4	basic transcription factor 3-like 4	Other	other
-0.205	7.076	0.000339	1421353_at		PDE7B	phosphodiesterase 7B	Cytoplasm	enzyme	dyphylline, nitroglycerin, aminophylline, anagrelide, milrinone, dipyridamole, ketotifen, tolbutamide, theophylline, pentoxifylline
-0.205	10.669	0.000413	1417438_at		RDH14	retinol dehydrogenase 14 (all-trans/9-cis/11-cis)	Other	enzyme
-0.204	9.557	0.00171	1437292_at		CLVS2	clavesin 2	Cytoplasm	transporter
-0.204	8.092	0.00133	1419619_at		KRT80	keratin 80	Cytoplasm	other
-0.204	10.733	0.000463	1434864_at		NIPA1	non imprinted in Prader-Willi/Angelman syndrome 1	Plasma Membrane	other
-0.203	8.812	0.00158	1425383_a_at		PBX1	pre-B-cell leukemia homeobox 1	Nucleus	transcription regulator
-0.202	9.256	0.00137	1419595_a_at		GGH	gamma-glutamyl hydrolase (conjugase, folylpolygammaglutamyl hydrolase)	Cytoplasm	peptidase
-0.202	9.118	0.000212	1424346_at		PPP6C	protein phosphatase 6, catalytic subunit	Nucleus	phosphatase
-0.202	10.461	0.000528	1417052_at		PSMB3	proteasome (prosome, macropain) subunit, beta type, 3	Cytoplasm	peptidase
-0.201	7.582	0.00126	1421032_a_at		DNAJB12	DnaJ (Hsp40) homolog, subfamily B, member 12	Cytoplasm	other
-0.201	9.332	0.0024	1434035_at		DNAJB6	DnaJ (Hsp40) homolog, subfamily B, member 6	Nucleus	transcription regulator
-0.201	8.419	0.00073	1424743_at		JMJD8	jumonji domain containing 8	Other	other
-0.2	9.896	0.00123	1450103_a_at		CYTH2	cytohesin 2	Cytoplasm	other
-0.2	10.04	0.00112	1424350_s_at		LPGAT1	lysophosphatidylglycerol acyltransferase 1	Cytoplasm	other
-0.2	7.937	0.0027	1425597_a_at		QKI	QKI, KH domain containing, RNA binding	Nucleus	other
-0.2	9.45	0.00157	1426225_at		RBP4	retinol binding protein 4, plasma	Extracellular Space	transporter
-0.2	8.482	0.000573	1437758_a_at		SLC4A1AP	solute carrier family 4 (anion exchanger), member 1, adaptor protein	Nucleus	transporter
-0.199	10.955	0.000314	1428540_at		FAM115A	family with sequence similarity 115, member A	Other	other
-0.199	8.467	0.00024	1455798_at		GALK2	galactokinase 2	Cytoplasm	kinase
-0.199	11.123	0.000446	1437062_s_at		PHYHIPL	phytanoyl-CoA 2-hydroxylase interacting protein-like	Cytoplasm	other
-0.199	10.419	0.0013	1435066_at		Pitpnc1	phosphatidylinositol transfer protein, cytoplasmic 1	Cytoplasm	transporter
-0.199	10.719	0.00256	1434486_x_at	D	UGP2	UDP-glucose pyrophosphorylase 2	Cytoplasm	enzyme
-0.198	8.802	0.000386	1455509_at		Nacad	NAC alpha domain containing	Other	other
-0.198	8.192	0.00298	1426503_a_at		RNF121	ring finger protein 121	Other	other
-0.198	9.538	0.00134	1451997_at		ZNF426	zinc finger protein 426	Nucleus	other
-0.197	10.257	0.00193	1451979_at		KRAS	Kirsten rat sarcoma viral oncogene homolog	Cytoplasm	enzyme
-0.196	8.086	0.00142	1460426_at		PDE4DIP	phosphodiesterase 4D interacting protein	Cytoplasm	enzyme
-0.196	12.154	0.000516	1415845_at		SYT4	synaptotagmin IV	Cytoplasm	transporter
-0.195	10.667	0.00143	1428097_at		C3orf70	chromosome 3 open reading frame 70	Other	other
-0.195	8.725	0.00206	1429138_at		NPAS3	neuronal PAS domain protein 3	Nucleus	other
-0.195	9.995	0.00112	1451056_at		PSMD7	proteasome (prosome, macropain) 26S subunit, non-ATPase, 7	Cytoplasm	other
-0.194	11.265	0.00123	1417768_at		PNPLA8	patatin-like phospholipase domain containing 8	Cytoplasm	enzyme
-0.194	10.133	0.00185	1436681_x_at		SF3B6	splicing factor 3b, subunit 6, 14kDa	Nucleus	other
-0.194	11.468	0.00221	1452269_at		SPTBN2	spectrin, beta, non-erythrocytic 2	Cytoplasm	other
-0.194	8.881	0.00139	1423928_at		UBAC2	UBA domain containing 2	Cytoplasm	enzyme
-0.193	10.807	0.000869	1420979_at		PAK1	p21 protein (Cdc42/Rac)-activated kinase 1	Cytoplasm	kinase
-0.193	11.081	0.00194	1439022_at		PHACTR1	phosphatase and actin regulator 1	Cytoplasm	other
-0.193	9.666	0.00307	1434261_at		SIPA1L2	signal-induced proliferation-associated 1 like 2	Other	other
-0.192	9.119	0.00217	1422763_at		GIPC1	GIPC PDZ domain containing family, member 1	Cytoplasm	other
-0.192	8.176	0.00208	1418491_a_at		PUS3	pseudouridylate synthase 3	Nucleus	enzyme
-0.191	11.691	0.00122	1438292_x_at		ADK	adenosine kinase	Nucleus	kinase	pegintron/ribavirin, PEG-interferon alfa-2a/ribavirin, interferon alfa-2b/ribavirin, ribavirin
-0.191	9.731	0.000475	1425956_a_at		CDADC1	cytidine and dCMP deaminase domain containing 1	Other	kinase
-0.191	11.296	0.00256	1448468_a_at		KCNAB1	potassium voltage-gated channel, shaker-related subfamily, beta member 1	Plasma Membrane	ion channel
-0.191	9.308	0.00144	1423694_at		KCTD10	potassium channel tetramerization domain containing 10	Nucleus	ion channel
-0.191	11.018	0.000913	1436920_at		PCDH17	protocadherin 17	Other	other
-0.191	10.038	0.000895	1452333_at		SMARCA2	SWI/SNF related, matrix associated, actin dependent regulator of chromatin, subfamily a, member 2	Nucleus	transcription regulator
-0.191	10.745	0.000524	1434219_at		STIM2	stromal interaction molecule 2	Plasma Membrane	transporter
-0.191	8.38	0.000969	1426311_s_at		ZDHHC5	zinc finger, DHHC-type containing 5	Nucleus	enzyme
-0.19	9.252	0.000846	1424869_at		DHRS7B	dehydrogenase/reductase (SDR family) member 7B	Other	other
-0.189	7.109	0.00256	1435452_at		SLC35G1	solute carrier family 35, member G1	Plasma Membrane	other
-0.188	8.417	0.00281	1448327_at		ACTN2	actinin, alpha 2	Nucleus	transcription regulator
-0.188	8.404	0.000961	1418335_a_at		OVCA2	ovarian tumor suppressor candidate 2	Cytoplasm	other
-0.188	9.375	0.00274	1455708_at		TMOD3	tropomodulin 3 (ubiquitous)	Cytoplasm	other
-0.187	7.923	0.00166	1453284_at		FAM151B	family with sequence similarity 151, member B	Other	other
-0.187	11.981	0.00304	1420981_a_at		LMO4	LIM domain only 4	Nucleus	transcription regulator
-0.187	9.928	0.000778	1452591_a_at		MZT2A	mitotic spindle organizing protein 2A	Cytoplasm	other
-0.187	8.684	0.00106	1416931_at		NIF3L1	NIF3 NGG1 interacting factor 3-like 1 (S. cerevisiae)	Cytoplasm	other
-0.187	9.434	0.00276	1425330_a_at		PPM1B	protein phosphatase, Mg2+/Mn2+ dependent, 1B	Cytoplasm	phosphatase
-0.186	9.448	0.0024	1449348_at		MPP6	membrane protein, palmitoylated 6 (MAGUK p55 subfamily member 6)	Plasma Membrane	kinase
-0.186	10.495	0.000292	1427913_at		RWDD1	RWD domain containing 1	Other	other
-0.185	7.652	0.00203	1428032_at		ACVR1C	activin A receptor, type IC	Plasma Membrane	kinase
-0.183	10.597	0.00161	1433736_at		HCFC1	host cell factor C1 (VP16-accessory protein)	Nucleus	transcription regulator
-0.183	10.79	0.00282	1449471_at		KCNMB4	potassium large conductance calcium-activated channel, subfamily M, beta member 4	Plasma Membrane	ion channel	tedisamil
-0.183	11.686	0.000222	1460239_at		TSPAN13	tetraspanin 13	Plasma Membrane	other
-0.182	9.786	0.00307	1426383_at		CRY2	cryptochrome circadian clock 2	Nucleus	enzyme
-0.182	10.561	0.00108	1423183_at	D	LGI1	leucine-rich, glioma inactivated 1	Plasma Membrane	other
-0.182	8.814	0.00121	1448332_at		PEX19	peroxisomal biogenesis factor 19	Cytoplasm	other
-0.182	8.581	0.00119	1434776_at		SEMA5A	sema domain, seven thrombospondin repeats (type 1 and type 1-like), transmembrane domain (TM) and short cytoplasmic domain, (semaphorin) 5A	Plasma Membrane	transmembrane receptor
-0.182	9.722	0.00223	1431745_a_at		ZC3H14	zinc finger CCCH-type containing 14	Nucleus	other
-0.181	9.166	0.00203	1452601_a_at		ACBD6	acyl-CoA binding domain containing 6	Other	other
-0.181	8.821	0.000528	1428267_at		DHX40	DEAH (Asp-Glu-Ala-His) box polypeptide 40	Other	enzyme
-0.181	7.595	0.00155	1432073_at		PTGES3L	prostaglandin E synthase 3 (cytosolic)-like	Other	other
-0.18	10.09	0.00177	1415718_at		SAP30L	SAP30-like	Nucleus	other
-0.18	7.226	0.00271	1429834_a_at		VPS51	vacuolar protein sorting 51 homolog (S. cerevisiae)	Cytoplasm	other
-0.179	10.228	0.00119	1416635_at		SMPDL3A	sphingomyelin phosphodiesterase, acid-like 3A	Extracellular Space	enzyme
-0.178	9.375	0.0028	1434143_at		ATMIN	ATM interactor	Nucleus	other
-0.178	7.704	0.00129	1421102_a_at		VAMP3	vesicle-associated membrane protein 3	Plasma Membrane	other
-0.177	7.868	0.000385	1434158_at		GMDS	GDP-mannose 4,6-dehydratase	Cytoplasm	enzyme
-0.177	10.297	0.00157	1426613_a_at		SNRPB2	small nuclear ribonucleoprotein polypeptide B	Nucleus	other
-0.177	10.105	0.0027	1416336_s_at		SNRPD1	small nuclear ribonucleoprotein D1 polypeptide 16kDa	Nucleus	other
-0.177	10.238	0.000551	1417583_a_at		UTP3	UTP3, small subunit (SSU) processome component, homolog (S. cerevisiae)	Nucleus	other
-0.176	8.667	0.00091	1418844_at		ALG9	ALG9, alpha-1,2-mannosyltransferase	Cytoplasm	enzyme
-0.176	8.249	0.00275	1450351_a_at		CLIP1	CAP-GLY domain containing linker protein 1	Cytoplasm	other
-0.176	9.489	0.00199	1415987_at		HDLBP	high density lipoprotein binding protein	Nucleus	transporter
-0.176	10.112	0.00225	1425104_at		KCTD1	potassium channel tetramerization domain containing 1	Nucleus	transcription regulator
-0.176	9.11	0.00172	1427212_at		MAPKAP1	mitogen-activated protein kinase associated protein 1	Cytoplasm	other
-0.176	9.675	0.00156	1421891_at		ST3GAL2	ST3 beta-galactoside alpha-2,3-sialyltransferase 2	Cytoplasm	enzyme
-0.176	9.673	0.00174	1428189_at		TPGS2	tubulin polyglutamylase complex subunit 2	Nucleus	other
-0.175	8.902	0.00093	1426669_at		CPPED1	calcineurin-like phosphoesterase domain containing 1	Other	enzyme
-0.175	8.19	0.0024	1419805_s_at		GGPS1	geranylgeranyl diphosphate synthase 1	Cytoplasm	enzyme	zoledronic acid
-0.175	7.925	0.00252	1434945_at		LPCAT2	lysophosphatidylcholine acyltransferase 2	Cytoplasm	enzyme
-0.175	8.281	0.00203	1427382_a_at		SUV39H1	suppressor of variegation 3-9 homolog 1 (Drosophila)	Nucleus	enzyme
-0.175	7.921	0.00153	1443948_at		TTC9C	tetratricopeptide repeat domain 9C	Other	other
-0.174	8.402	0.00146	1447882_x_at		DDX54	DEAD (Asp-Glu-Ala-Asp) box polypeptide 54	Nucleus	transcription regulator
-0.174	11.389	0.000744	1415973_at		Marcks	myristoylated alanine rich protein kinase C substrate	Plasma Membrane	other
-0.174	8.097	0.000892	1454798_at		RBM15B	RNA binding motif protein 15B	Nucleus	other
-0.174	10.159	0.00151	1419259_at		RSU1	Ras suppressor protein 1	Cytoplasm	other
-0.174	9.266	0.00193	1416436_a_at		UQCC1	ubiquinol-cytochrome c reductase complex assembly factor 1	Cytoplasm	other
-0.173	7.328	0.00166	1434577_at		C15orf41	chromosome 15 open reading frame 41	Other	other
-0.173	10.66	0.000644	1448335_s_at		CCNI	cyclin I	Other	other
-0.173	11.806	0.00117	1456387_at		NOL4	nucleolar protein 4	Nucleus	other
-0.172	8.934	0.00169	1418435_at		MKRN1	makorin ring finger protein 1	Other	enzyme
-0.172	7.581	0.00177	1440976_at		Zfp652os	zinc finger protein 652, opposite strand	Other	other
-0.171	11.027	0.00129	1460180_at		HEXB	hexosaminidase B (beta polypeptide)	Cytoplasm	enzyme
-0.17	10.126	0.00138	1436824_x_at		RNF26	ring finger protein 26	Other	other
-0.17	11.856	0.00162	1437977_at		SGTB	small glutamine-rich tetratricopeptide repeat (TPR)-containing, beta	Other	other
-0.168	10.519	0.00298	1427901_at		MRPS18C	mitochondrial ribosomal protein S18C	Cytoplasm	other
-0.167	10.09	0.000769	1456040_at	D	SF3B2	splicing factor 3b, subunit 2, 145kDa	Nucleus	other
-0.166	10.35	0.00264	1416212_at		MAGOH	mago-nashi homolog, proliferation-associated (Drosophila)	Nucleus	other
-0.166	9.474	0.00284	1436503_at		OVOS2	ovostatin 2	Other	other
-0.166	10.855	0.0016	1426449_a_at		PJA1	praja ring finger 1, E3 ubiquitin protein ligase	Cytoplasm	enzyme
-0.165	8.112	0.00242	1438196_at		GPD1L	glycerol-3-phosphate dehydrogenase 1-like	Cytoplasm	enzyme
-0.165	8.573	0.00118	1445475_at		PAK6	p21 protein (Cdc42/Rac)-activated kinase 6	Cytoplasm	kinase
-0.164	8.855	0.00139	1452728_at		KIRREL3	kin of IRRE like 3 (Drosophila)	Extracellular Space	other
-0.164	10.6	0.00304	1416092_a_at		MAP4	microtubule-associated protein 4	Cytoplasm	other
-0.163	10.81	0.00256	1433939_at		AFF3	AF4/FMR2 family, member 3	Nucleus	transcription regulator
-0.162	8.354	0.00215	1419690_at		2610002M06Rik	RIKEN cDNA 2610002M06 gene	Cytoplasm	other
-0.162	10.874	0.00247	1435879_at		AKT3	v-akt murine thymoma viral oncogene homolog 3	Cytoplasm	kinase	enzastaurin
-0.161	8.794	0.00253	1417398_at		RRAS2	related RAS viral (r-ras) oncogene homolog 2	Plasma Membrane	enzyme
-0.159	9.82	0.0016	1417731_at		PQBP1	polyglutamine binding protein 1	Nucleus	transcription regulator
-0.158	10.878	0.00112	1460555_at		FAM65B	family with sequence similarity 65, member B	Other	other
-0.158	9.14	0.00175	1450023_at		GTPBP1	GTP binding protein 1	Cytoplasm	enzyme
-0.156	9.314	0.00085	1428290_at		MIPEP	mitochondrial intermediate peptidase	Cytoplasm	peptidase
-0.156	10.146	0.00119	1450250_at		OTUD7A	OTU deubiquitinase 7A	Cytoplasm	peptidase
-0.154	11.185	0.00107	1435961_at		NAT14	N-acetyltransferase 14 (GCN5-related, putative)	Extracellular Space	other
-0.153	11.161	0.0009	1425674_a_at		SSU72	SSU72 RNA polymerase II CTD phosphatase homolog (S. cerevisiae)	Other	phosphatase
-0.151	9.447	0.00203	1418406_at		PDE8A	phosphodiesterase 8A	Cytoplasm	enzyme	dyphylline, nitroglycerin, aminophylline, anagrelide, milrinone, dipyridamole, ketotifen, tolbutamide, theophylline, pentoxifylline
-0.151	10.813	0.00181	1433566_at		RASL10B	RAS-like, family 10, member B	Other	enzyme
-0.15	10.557	0.00301	1422442_at		SMU1	smu-1 suppressor of mec-8 and unc-52 homolog (C. elegans)	Nucleus	other
-0.15	10.444	0.00189	1431746_a_at		UBA3	ubiquitin-like modifier activating enzyme 3	Cytoplasm	enzyme
-0.148	8.123	0.00194	1449257_at		FAM104A	family with sequence similarity 104, member A	Other	other
-0.145	8.275	0.00241	1429252_at		C17orf49	chromosome 17 open reading frame 49	Nucleus	other
-0.144	8.923	0.00144	1428222_at		DCLK2	doublecortin-like kinase 2	Cytoplasm	kinase
-0.144	12.415	0.00159	1427247_at		LPPR4	lipid phosphate phosphatase-related protein type 4	Plasma Membrane	phosphatase
-0.137	10.147	0.00293	1451587_a_at		TIPRL	TOR signaling pathway regulator	Cytoplasm	other
-0.136	10.372	0.00293	1451135_at		GTF2B	general transcription factor IIB	Nucleus	transcription regulator
-0.134	10.571	0.00265	1453849_s_at		HNRNPAB	heterogeneous nuclear ribonucleoprotein A/B	Nucleus	enzyme
-0.133	11.826	0.00264	1416022_at		FABP5	fatty acid binding protein 5 (psoriasis-associated)	Cytoplasm	transporter
-0.132	9.672	0.00243	1420000_s_at		IGBP1	immunoglobulin (CD79A) binding protein 1	Cytoplasm	phosphatase
1.674	7.333	2.51e-08	1428909_at
1.535	6.837	1.09e-05	1421811_at
0.761	8.973	1.49e-06	1445534_at
0.709	8.353	0.00054	1445322_x_at
0.657	6.949	0.0023	1444749_at
0.606	7.368	0.00229	1457746_at
0.577	7.119	0.000136	1443905_at
0.571	7.583	0.000959	1444119_at
0.559	5.749	0.00132	1439311_at
0.557	8.365	7.1e-05	1456346_at
0.54	6.687	6.32e-05	1439948_at
0.514	5.963	0.000173	1443848_at
0.512	6.27	0.000623	1442418_at
0.512	8.406	0.000982	1439305_at
0.51	5.815	0.00274	1457489_at
0.504	6.908	0.000227	1456808_at
0.489	7.593	0.000707	1446421_at
0.479	8.055	0.00141	1443983_at
0.476	7.411	8.06e-06	1443166_at
0.466	6.624	2.15e-05	1435629_at
0.462	7.682	4.32e-06	1438326_at
0.459	10.018	0.0019	1424607_a_at
0.456	5.989	0.00287	1446157_at
0.442	9.167	1.32e-05	1455744_at
0.434	5.324	0.00214	1440123_at
0.432	7.895	0.00113	1439125_at
0.431	7.708	0.000736	1446299_at
0.405	7.178	0.00208	1442365_at
0.397	6.852	0.000273	1440320_at
0.39	8.109	0.00051	1445579_at
0.387	7.724	0.00198	1448096_at
0.385	8.256	3.43e-05	1441636_at
0.383	8.9	0.000106	1434390_at
0.376	8.465	0.00109	1439537_at
0.372	5.562	0.000387	1445443_at
0.37	7.124	0.00138	1443214_at
0.369	5.599	0.00066	1446001_at
0.367	6.597	0.000847	1438871_at
0.36	7.633	0.00119	1440896_at
0.359	7.078	0.00187	1459307_at
0.358	7.069	0.000134	1443521_at
0.352	7.478	0.000778	1457297_at
0.351	6.327	0.000782	1443158_at
0.35	7.659	0.0011	1444806_at
0.349	6.552	0.000392	1459315_at
0.349	8.235	0.00227	1436599_at
0.348	7.114	0.00071	1457175_at
0.34	6.975	0.000392	1435144_at
0.332	5.992	0.00161	1458213_at
0.328	8.232	0.000185	1440305_at
0.327	7.381	0.00294	1456514_at
0.325	8.359	0.00112	1456209_x_at
0.325	8.338	0.00139	1437916_at
0.325	6.545	0.00158	1445224_at
0.325	6.471	0.00178	1446779_at
0.32	6.973	0.00273	1440314_at
0.319	5.128	0.000754	1446241_at
0.314	7.497	0.000614	1440103_at
0.31	6.275	0.000252	1443153_at
0.308	7.798	0.000366	1440892_at
0.308	6.605	0.00123	1454304_at
0.307	6.378	0.000696	1447034_at
0.305	6.875	0.000176	1457559_at
0.303	6.422	7.34e-05	1425421_at
0.303	9.189	0.000706	1426060_at
0.295	7.236	0.000441	1440349_at
0.293	6.575	0.000796	1446245_at
0.291	5.742	0.000392	1440511_at
0.286	6.146	0.00148	1458555_at
0.281	5.721	0.00114	1457615_at
0.279	6.269	0.00173	1459187_at
0.278	6.358	0.00186	1459630_at
0.277	7.017	0.00122	1459704_at
0.273	7.112	0.00154	1441704_at
0.254	6.899	0.00301	1447263_at
0.253	6.409	0.00302	1456689_at
0.251	9.277	0.00195	1438685_at
0.246	6.786	0.00253	1444188_at
0.245	6.379	0.00116	1442956_at
0.242	8.209	7.47e-05	1435908_at
0.237	6.756	0.000542	1439292_at
0.236	7.509	0.000113	1446411_at
0.234	5.539	0.00216	1442213_at
0.233	6.511	0.000594	1458700_at
0.233	5.934	0.0023	1456913_at
0.232	6.586	0.00242	1458566_at
0.229	9.491	0.000999	1434391_at
0.225	6.723	0.000832	1456659_at
0.224	8.041	0.00168	1444785_at
0.223	7.352	0.00201	1456849_at
0.223	7.705	0.00215	1443378_s_at
0.223	6.771	0.00244	1445235_at
0.185	6.962	0.00259	1442725_at
0.18	9.269	0.00196	1436462_at
0.175	7.27	0.00221	1458994_at
-0.169	8.049	0.00244	1448057_at
-0.18	8.689	0.00135	1441298_at
-0.197	9.912	0.000872	1450026_a_at
-0.219	9.161	0.000619	1455298_at
-0.259	5.869	0.000884	1442708_at
-0.278	10.884	0.000426	1441815_at
-0.296	7.407	0.00105	1420852_a_at
-0.298	7.303	0.000997	1441368_at
-0.303	8.94	0.00256	1435120_at
-0.308	8.379	3.92e-05	1442257_at
-0.317	6.879	0.00284	1437498_at

## Sheet: F24hFBS
Log Ratio	Intensity/RPKM/FPKM	p-value	ID	Notes	Symbol	Entrez Gene Name	Location	Type(s)	Drug(s)
3.133	8.002	2.66e-08	1419282_at		CCL2	chemokine (C-C motif) ligand 2	Extracellular Space	cytokine	mimosine
2.758	7.847	4.25e-10	1448239_at		HMOX1	heme oxygenase (decycling) 1	Cytoplasm	enzyme	tin mesoporphyrin
2.683	10.714	0.000106	1452757_s_at	D	HBA1/HBA2	hemoglobin, alpha 1	Extracellular Space	transporter	iron dextran, mefloquine
2.563	6.386	6.5e-09	1419599_s_at		MS4A6A	membrane-spanning 4-domains, subfamily A, member 6A	Other	other
2.386	8.017	2.73e-09	1434376_at	D	CD44	CD44 molecule (Indian blood group)	Plasma Membrane	enzyme
2.376	10.502	1.35e-05	1417184_s_at		Hbb-b2	hemoglobin, beta adult minor chain	Other	other
2.199	7.394	0.000286	1455899_x_at	D	SOCS3	suppressor of cytokine signaling 3	Cytoplasm	phosphatase
2.152	9.143	1.32e-11	1416382_at		CTSC	cathepsin C	Cytoplasm	peptidase
2.089	9.383	1.39e-08	1440142_s_at	D	GFAP	glial fibrillary acidic protein	Cytoplasm	other
1.878	8.057	5.99e-09	1435477_s_at	D	FCGR2B	Fc fragment of IgG, low affinity IIb, receptor (CD32)	Plasma Membrane	transmembrane receptor	IgG
1.876	7.419	6.02e-08	1422476_at		IFI30	interferon, gamma-inducible protein 30	Cytoplasm	enzyme
1.876	7.601	1.07e-05	1418674_at		OSMR	oncostatin M receptor	Plasma Membrane	transmembrane receptor
1.861	8.361	1.68e-07	1434719_at		A2M	alpha-2-macroglobulin	Extracellular Space	transporter
1.817	9.434	6.33e-07	1438658_a_at		S1PR3	sphingosine-1-phosphate receptor 3	Plasma Membrane	G-protein coupled receptor	fingolimod
1.77	8.842	7.97e-07	1444564_at	D	APOD	apolipoprotein D	Extracellular Space	transporter
1.768	8.265	1e-08	1451537_at		CHI3L1	chitinase 3-like 1 (cartilage glycoprotein-39)	Extracellular Space	enzyme
1.754	7.664	3.51e-06	1456250_x_at	D	TGFBI	transforming growth factor, beta-induced, 68kDa	Extracellular Space	other
1.74	7.395	2.96e-07	1418826_at		Ms4a6b	membrane-spanning 4-domains, subfamily A, member 6B	Other	other
1.735	7.723	6.27e-11	1415983_at		LCP1	lymphocyte cytosolic protein 1 (L-plastin)	Cytoplasm	other
1.696	9.474	7.92e-09	1456292_a_at	D	VIM	vimentin	Cytoplasm	other
1.642	7.374	1.43e-06	1435906_x_at		GBP2	guanylate binding protein 2, interferon-inducible	Cytoplasm	enzyme
1.571	10.582	1.26e-06	1422903_at		LY86	lymphocyte antigen 86	Plasma Membrane	other
1.525	8.071	1.15e-09	1436332_at		HSPB6	heat shock protein, alpha-crystallin-related, B6	Cytoplasm	other
1.519	7.893	3.14e-07	1422124_a_at		PTPRC	protein tyrosine phosphatase, receptor type, C	Plasma Membrane	phosphatase
1.517	8.432	0.000242	1423233_at		CEBPD	CCAAT/enhancer binding protein (C/EBP), delta	Nucleus	transcription regulator
1.514	10.231	4.63e-09	1423754_at		IFITM3	interferon induced transmembrane protein 3	Plasma Membrane	other
1.508	7.995	9.99e-10	1417346_at		PYCARD	PYD and CARD domain containing	Cytoplasm	transcription regulator
1.462	6.138	5.07e-08	1419004_s_at		BCL2A1	BCL2-related protein A1	Cytoplasm	other
1.436	9.121	1.61e-08	1421375_a_at		S100A6	S100 calcium binding protein A6	Cytoplasm	transporter
1.417	7.419	3e-07	1417266_at		Ccl6	chemokine (C-C motif) ligand 6	Extracellular Space	cytokine
1.387	7.687	1.54e-08	1456014_s_at		FERMT3	fermitin family member 3	Cytoplasm	enzyme
1.378	7.435	1.47e-07	1450234_at		Ms4a6c	membrane-spanning 4-domains, subfamily A, member 6C	Other	other
1.355	8.674	1.57e-07	1460351_at		LOC102637129/S100a11	S100 calcium binding protein A11 (calgizzarin)	Cytoplasm	other
1.285	7.907	5.1e-09	1428114_at	D	SLC14A1	solute carrier family 14 (urea transporter), member 1 (Kidd blood group)	Plasma Membrane	transporter
1.263	7.296	5.03e-07	1435386_at		VWF	von Willebrand factor	Extracellular Space	other	F8
1.256	8.961	2.47e-08	1424254_at		Ifitm1	interferon induced transmembrane protein 1	Other	other
1.227	9.667	1.29e-05	1449254_at		SPP1	secreted phosphoprotein 1	Extracellular Space	cytokine
1.223	9.131	1.03e-07	1416226_at		ARPC1B	actin related protein 2/3 complex, subunit 1B, 41kDa	Cytoplasm	other
1.22	9.434	3.24e-07	1436996_x_at	D	LYZ	lysozyme	Extracellular Space	enzyme
1.214	8.68	0.000206	1448471_a_at	D	Ctla2a/Ctla2b	cytotoxic T lymphocyte-associated protein 2 alpha	Plasma Membrane	other
1.17	6.718	1.1e-07	1449455_at		HCK	hemopoietic cell kinase	Cytoplasm	kinase	bosutinib
1.169	9.779	5.1e-08	1421814_at	D	MSN	moesin	Plasma Membrane	other
1.166	6.551	9.15e-06	1442082_at	D	C3AR1	complement component 3a receptor 1	Plasma Membrane	G-protein coupled receptor
1.155	9.385	1.98e-06	1450958_at		TM4SF1	transmembrane 4 L six family member 1	Plasma Membrane	other
1.129	9.181	2.97e-07	1418021_at		C4A/C4B	complement component 4B (Chido blood group)	Extracellular Space	other	IgG
1.115	6.691	5.47e-06	1420028_s_at		MCM3	minichromosome maintenance complex component 3	Nucleus	enzyme
1.115	6.938	1.3e-05	1438852_x_at	D	MCM6	minichromosome maintenance complex component 6	Nucleus	enzyme
1.108	6.532	1.27e-07	1460302_at	D	THBS1	thrombospondin 1	Extracellular Space	other
1.106	7.58	6.91e-10	1450678_at		ITGB2	integrin, beta 2 (complement component 3 receptor 3 and 4 subunit)	Plasma Membrane	transmembrane receptor
1.105	9.224	1.48e-08	1448617_at		CD53	CD53 molecule	Plasma Membrane	other
1.104	10.369	3.85e-07	1417426_at		Srgn	serglycin	Cytoplasm	other
1.092	7.747	2.04e-06	1460218_at		Cd52	CD52 antigen	Other	other
1.081	8.334	2.5e-08	1417495_x_at	D	CP	ceruloplasmin (ferroxidase)	Extracellular Space	enzyme
1.081	6.202	3.15e-08	1416527_at		RAB32	RAB32, member RAS oncogene family	Cytoplasm	other
1.079	8.352	1.28e-07	1449164_at		CD68	CD68 molecule	Plasma Membrane	other
1.059	8.984	4.08e-06	1433428_x_at	D	TGM2	transglutaminase 2	Cytoplasm	enzyme
1.056	7.447	1.31e-06	1424265_at		NPL	N-acetylneuraminate pyruvate lyase (dihydrodipicolinate synthase)	Other	enzyme
1.041	9.168	1.18e-05	1448982_at		KLK6	kallikrein-related peptidase 6	Extracellular Space	peptidase
1.033	8.454	0.00264	1450716_at		ADAMTS1	ADAM metallopeptidase with thrombospondin type 1 motif, 1	Extracellular Space	peptidase
1.029	7.91	7.32e-09	1448124_at		GUSB	glucuronidase, beta	Cytoplasm	enzyme
1.027	10.055	1.32e-05	1422943_a_at	D	HSPB1	heat shock 27kDa protein 1	Cytoplasm	other
1.017	8.543	7.47e-06	1420498_a_at	D	DAB2	Dab, mitogen-responsive phosphoprotein, homolog 2 (Drosophila)	Plasma Membrane	other
1.016	8.686	2.69e-05	1417460_at		IFITM2	interferon induced transmembrane protein 2	Other	other
1.011	9.502	6.06e-06	1419309_at		PDPN	podoplanin	Plasma Membrane	other
1.007	7.519	2.31e-07	1451969_s_at	D	PARP3	poly (ADP-ribose) polymerase family, member 3	Nucleus	enzyme
1.006	8.072	4.63e-08	1416656_at		CLIC1	chloride intracellular channel 1	Nucleus	ion channel
1.003	8.766	6.53e-06	1448620_at		FCGR2A	Fc fragment of IgG, low affinity IIa, receptor (CD32)	Plasma Membrane	transmembrane receptor	IgG
0.995	9.719	3.16e-09	1418340_at		FCER1G	Fc fragment of IgE, high affinity I, receptor for; gamma polypeptide	Plasma Membrane	transmembrane receptor
0.982	6.863	6.8e-07	1416342_at		TNC	tenascin C	Extracellular Space	other
0.978	8.811	5.82e-05	1419665_a_at		NUPR1	nuclear protein, transcriptional regulator, 1	Nucleus	transcription regulator
0.976	7.719	1.7e-07	1423693_at		CELA1	chymotrypsin-like elastase family, member 1	Extracellular Space	peptidase
0.971	7.586	8.36e-07	1454268_a_at		CYBA	cytochrome b-245, alpha polypeptide	Cytoplasm	enzyme
0.966	7.099	2.6e-08	1418483_a_at		Ggta1	glycoprotein galactosyltransferase alpha 1, 3	Cytoplasm	other
0.966	7.036	5.51e-07	1438948_x_at		TSPO	translocator protein (18kDa)	Cytoplasm	transmembrane receptor	CGS-8216, fluoxetine/olanzapine, estazolam, clorazepate, eszopiclone, temazepam, zolpidem, chlordiazepoxide, lorazepam, olanzapine, triazolam, flumazenil, clonazepam, flurazepam, midazolam, flunitrazepam, alprazolam, zaleplon, SSR180575, PK 11195
0.955	8.103	1.79e-06	1425603_at	D	TMEM176A	transmembrane protein 176A	Other	other
0.951	9.164	1.16e-07	1437726_x_at	D	C1QB	complement component 1, q subcomponent, B chain	Extracellular Space	other
0.939	7.697	7.14e-09	1448929_at		F13A1	coagulation factor XIII, A1 polypeptide	Extracellular Space	enzyme
0.93	8.775	4.18e-05	1418892_at		RHOJ	ras homolog family member J	Cytoplasm	enzyme
0.919	8.898	2.1e-06	1419091_a_at		ANXA2	annexin A2	Plasma Membrane	other
0.915	7.616	2.95e-06	1417876_at		FCGR1A	Fc fragment of IgG, high affinity Ia, receptor (CD64)	Plasma Membrane	transmembrane receptor	IgG
0.885	9.125	1.53e-08	1417291_at		TNFRSF1A	tumor necrosis factor receptor superfamily, member 1A	Plasma Membrane	transmembrane receptor
0.876	7.242	0.000141	1448558_a_at		PLA2G4A	phospholipase A2, group IVA (cytosolic, calcium-dependent)	Cytoplasm	enzyme	quinacrine
0.875	7.131	6.39e-05	1433842_at		LRRFIP1	leucine rich repeat (in FLII) interacting protein 1	Cytoplasm	other
0.873	9.886	7.84e-06	1448891_at		Fcrls	Fc receptor-like S, scavenger receptor	Plasma Membrane	other
0.87	8.616	6.01e-06	1452016_at		ALOX5AP	arachidonate 5-lipoxygenase-activating protein	Plasma Membrane	other
0.864	6.189	9.98e-06	1448777_at		MCM2	minichromosome maintenance complex component 2	Nucleus	enzyme
0.863	8.066	9.95e-06	1434380_at	D	GBP7	guanylate binding protein 7	Cytoplasm	enzyme
0.856	7.518	6.35e-05	1417936_at		Ccl9	chemokine (C-C motif) ligand 9	Extracellular Space	cytokine
0.855	7.059	1.9e-05	1450430_at		MRC1	mannose receptor, C type 1	Plasma Membrane	transmembrane receptor	technetium Tc 99m tilmanocept
0.846	6.303	4.19e-06	1417620_at		RAC2	ras-related C3 botulinum toxin substrate 2 (rho family, small GTP binding protein Rac2)	Cytoplasm	enzyme
0.841	9.589	2.13e-06	1455439_a_at	D	LGALS1	lectin, galactoside-binding, soluble, 1	Extracellular Space	other
0.839	8.891	1.36e-06	1417928_at		PDLIM4	PDZ and LIM domain 4	Plasma Membrane	other
0.814	11.394	0.000451	1422660_at		RBM3	RNA binding motif (RNP1, RRM) protein 3	Cytoplasm	other
0.813	8.548	2.69e-05	1448276_at		TSPAN4	tetraspanin 4	Plasma Membrane	other
0.81	7.726	3.25e-06	1433696_at		HN1L	hematological and neurological expressed 1-like	Cytoplasm	other
0.808	9.305	2.6e-07	1422445_at	D	ITGA6	integrin, alpha 6	Plasma Membrane	transmembrane receptor
0.802	7.9	1.12e-05	1418580_at		RTP4	receptor (chemosensory) transporter protein 4	Plasma Membrane	other
0.791	8.513	3.73e-05	1436808_x_at		MCM5	minichromosome maintenance complex component 5	Nucleus	enzyme
0.787	6.435	0.000168	1426123_a_at	D	Rrbp1	ribosome binding protein 1	Cytoplasm	transporter
0.782	7.666	0.000453	1450783_at		IFIT1B	interferon-induced protein with tetratricopeptide repeats 1B	Cytoplasm	other
0.781	8.712	5.84e-06	1416698_a_at		CKS1B	CDC28 protein kinase regulatory subunit 1B	Other	kinase
0.78	5.864	0.000329	1438855_x_at		TNFAIP2	tumor necrosis factor, alpha-induced protein 2	Extracellular Space	other
0.778	7.542	0.000617	1427883_a_at		COL3A1	collagen, type III, alpha 1	Extracellular Space	other	collagenase clostridium histolyticum
0.774	6.562	0.000259	1422046_at		ITGAM	integrin, alpha M (complement component 3 receptor 3 subunit)	Plasma Membrane	transmembrane receptor
0.773	10.223	1.77e-05	1423584_at	D	IGFBP7	insulin-like growth factor binding protein 7	Extracellular Space	transporter
0.769	6.295	1.86e-05	1418191_at		USP18	ubiquitin specific peptidase 18	Cytoplasm	peptidase
0.763	8.737	7.9e-07	1426529_a_at		TAGLN2	transgelin 2	Cytoplasm	other
0.761	9.267	1.43e-06	1448475_at		OLFML3	olfactomedin-like 3	Extracellular Space	other
0.757	6.885	6.15e-07	1451860_a_at		Trim30a/Trim30d	tripartite motif-containing 30A	Cytoplasm	other
0.739	6.893	0.00341	1419043_a_at		Iigp1	interferon inducible GTPase 1	Other	enzyme
0.731	10.009	1.77e-06	1426587_a_at	D	STAT3	signal transducer and activator of transcription 3 (acute-phase response factor)	Nucleus	transcription regulator
0.73	7.691	2.84e-06	1426246_at		PROS1	protein S (alpha)	Extracellular Space	other
0.729	10.139	1.03e-06	1450792_at		TYROBP	TYRO protein tyrosine kinase binding protein	Plasma Membrane	transmembrane receptor
0.727	5.986	0.000183	1438954_x_at	D	FIGF	c-fos induced growth factor (vascular endothelial growth factor D)	Extracellular Space	growth factor
0.724	7.516	5.18e-07	1422612_at		HK2	hexokinase 2	Cytoplasm	kinase
0.714	9.433	2.24e-07	1426454_at		ARHGDIB	Rho GDP dissociation inhibitor (GDI) beta	Cytoplasm	other
0.712	7.887	0.000266	1445897_s_at	D	IFI35	interferon-induced protein 35	Nucleus	other
0.709	10.571	5.47e-07	1417381_at		C1QA	complement component 1, q subcomponent, A chain	Extracellular Space	other
0.707	7.82	0.00341	1417483_at		NFKBIZ	nuclear factor of kappa light polypeptide gene enhancer in B-cells inhibitor, zeta	Nucleus	transcription regulator
0.706	8.044	4.27e-06	1418204_s_at		AIF1	allograft inflammatory factor 1	Nucleus	other
0.704	7.878	3.9e-06	1451912_a_at	D	FGFRL1	fibroblast growth factor receptor-like 1	Plasma Membrane	transmembrane receptor
0.703	7.593	2.48e-06	1421322_a_at		IRF9	interferon regulatory factor 9	Nucleus	transcription regulator
0.701	6.268	0.00064	1424156_at		RBL1	retinoblastoma-like 1	Nucleus	transcription regulator
0.692	8.54	0.000174	1460330_at		ANXA3	annexin A3	Cytoplasm	enzyme
0.692	6.61	0.00242	1434437_x_at		RRM2	ribonucleotide reductase M2	Nucleus	enzyme	cytarabine/fludarabine phosphate, bortezomib/cladribine/rituximab, gemcitabine/paclitaxel, cyclophosphamide/fludarabine phosphate/rituximab, cladribine/cytarabine/daunorubicin, gemcitabine/oxaliplatin, gemcitabine/vinorelbine, docetaxel/gemcitabine, docetaxel/gemcitabine/vincristine, cladribine/cytarabine/filgrastim, capecitabine/gemcitabine, gemcitabine/oxaliplatin/paclitaxel, cytarabine/filgras…
0.691	7.068	2.32e-05	1428391_at		RAB3IL1	RAB3A interacting protein (rabin3)-like 1	Other	other
0.69	8.121	0.000207	1453299_a_at	D	PNP	purine nucleoside phosphorylase	Nucleus	enzyme	forodesine, 9-deaza-9-(3-thienylmethyl)guanine
0.683	9.816	1.05e-06	1449401_at		C1QC	complement component 1, q subcomponent, C chain	Extracellular Space	other
0.682	7.159	0.000165	1454783_at		IL13RA1	interleukin 13 receptor, alpha 1	Plasma Membrane	transmembrane receptor	cintredekin besudotox
0.681	10.293	3.34e-05	1447585_s_at	D	MRPS6	mitochondrial ribosomal protein S6	Cytoplasm	other
0.68	8.045	0.0018	1456046_at		CD93	CD93 molecule	Plasma Membrane	other
0.677	7.023	4.14e-07	1424552_at		CASP8	caspase 8, apoptosis-related cysteine peptidase	Nucleus	peptidase
0.677	6.155	5.8e-05	1419132_at		TLR2	toll-like receptor 2	Plasma Membrane	transmembrane receptor
0.673	7.7	0.000237	1423062_at	D	IGFBP3	insulin-like growth factor binding protein 3	Extracellular Space	other
0.668	6.2	4.45e-05	1427994_at		CD300LF	CD300 molecule-like family member f	Plasma Membrane	other
0.662	9.388	1.23e-06	1417870_x_at	D	CTSZ	cathepsin Z	Cytoplasm	peptidase
0.647	6.677	1.86e-05	1448894_at		AKR1B10	aldo-keto reductase family 1, member B10 (aldose reductase)	Cytoplasm	enzyme
0.645	8.287	2.31e-07	1448380_at		LGALS3BP	lectin, galactoside-binding, soluble, 3 binding protein	Plasma Membrane	transmembrane receptor
0.639	5.611	2.63e-06	1419631_at		WAS	Wiskott-Aldrich syndrome	Cytoplasm	other
0.638	7.647	0.00111	1426725_s_at		ETS1	v-ets avian erythroblastosis virus E26 oncogene homolog 1	Nucleus	transcription regulator
0.633	8.412	9.62e-05	1448748_at	D	PLEK	pleckstrin	Cytoplasm	other
0.622	7.513	3.22e-05	1449251_at		NDP	Norrie disease (pseudoglioma)	Extracellular Space	growth factor
0.615	8.247	0.000912	1456772_at		NCF1	neutrophil cytosolic factor 1	Cytoplasm	enzyme
0.605	6.764	0.00345	1448232_x_at		TUBA1C	tubulin, alpha 1c	Cytoplasm	other	epothilone B, colchicine/probenecid, larotaxel, eribulin, davunetide, vintafolide, milataxel, cevipabulin, gemcitabine/paclitaxel, docetaxel/prednisone, capecitabine/docetaxel, paclitaxel/trastuzumab, cyclophosphamide/prednisone/vincristine, docetaxel/hydrocortisone, cyclophosphamide/docetaxel, gemcitabine/vinorelbine, cyclophosphamide/daunorubicin/imatinib/prednisone/vincristine, cyclophosphamid…
0.604	7.704	0.00256	1424143_a_at		CDT1	chromatin licensing and DNA replication factor 1	Nucleus	other
0.602	6.704	1.46e-05	1448562_at		UPP1	uridine phosphorylase 1	Cytoplasm	enzyme
0.6	6.92	4.01e-05	1417104_at		EMP3	epithelial membrane protein 3	Plasma Membrane	other
0.6	8.783	9.95e-06	1418825_at		Irgm1	immunity-related GTPase family M member 1	Cytoplasm	other
0.598	6.267	0.0026	1460431_at		GCNT1	glucosaminyl (N-acetyl) transferase 1, core 2	Cytoplasm	enzyme
0.594	6.858	0.000141	1434976_x_at		EIF4EBP1	eukaryotic translation initiation factor 4E binding protein 1	Cytoplasm	translation regulator
0.591	9.56	2.63e-06	1449893_a_at	D	LRIG1	leucine-rich repeats and immunoglobulin-like domains 1	Extracellular Space	other
0.59	9.52	5.9e-06	1422573_at		AMPD3	adenosine monophosphate deaminase 3	Cytoplasm	enzyme
0.59	9.211	3.98e-05	1418350_at	D	HBEGF	heparin-binding EGF-like growth factor	Extracellular Space	growth factor
0.59	8.174	8.76e-06	1451097_at		VASP	vasodilator-stimulated phosphoprotein	Plasma Membrane	other
0.587	10.057	1.51e-07	1450020_at		CX3CR1	chemokine (C-X3-C motif) receptor 1	Plasma Membrane	G-protein coupled receptor
0.586	8.053	0.000323	1417081_a_at	D	SYNGR2	synaptogyrin 2	Cytoplasm	other
0.585	8.041	0.000253	1449025_at		IFIT3	interferon-induced protein with tetratricopeptide repeats 3	Cytoplasm	other
0.585	8.911	0.000418	1455871_s_at		TAX1BP3	Tax1 (human T-cell leukemia virus type I) binding protein 3	Cytoplasm	transcription regulator
0.583	8.513	1.25e-05	1426221_at		VWA5A	von Willebrand factor A domain containing 5A	Nucleus	other
0.58	7.49	0.00176	1448995_at		PF4	platelet factor 4	Extracellular Space	cytokine
0.579	7.918	1.84e-06	1451318_a_at		LYN	v-yes-1 Yamaguchi sarcoma viral related oncogene homolog	Cytoplasm	kinase	bosutinib
0.579	7.407	5.6e-05	1420361_at		SLC11A1	solute carrier family 11 (proton-coupled divalent metal ion transporter), member 1	Plasma Membrane	transporter
0.574	6.971	4.75e-06	1416714_at		IRF8	interferon regulatory factor 8	Nucleus	transcription regulator
0.574	9	4.39e-05	1452398_at		PLCE1	phospholipase C, epsilon 1	Cytoplasm	enzyme
0.573	8.196	2.4e-05	1416625_at		SERPING1	serpin peptidase inhibitor, clade G (C1 inhibitor), member 1	Extracellular Space	other
0.572	7.373	0.000101	1434447_at		MET	met proto-oncogene	Plasma Membrane	kinase	crizotinib, tivantinib, cabozantinib, INC280, cabozantinib/erlotinib
0.572	8.967	0.00147	1426260_a_at		UGT1A6	UDP glucuronosyltransferase 1 family, polypeptide A6	Cytoplasm	enzyme
0.571	10.597	3.64e-07	1415677_at		DHRS1	dehydrogenase/reductase (SDR family) member 1	Cytoplasm	enzyme
0.57	8.872	1.73e-05	1423596_at	D	NEK6	NIMA-related kinase 6	Nucleus	kinase
0.565	6.856	5.2e-05	1436171_at		ARHGAP30	Rho GTPase activating protein 30	Cytoplasm	other
0.561	7.223	0.000113	1422005_at		EIF2AK2	eukaryotic translation initiation factor 2-alpha kinase 2	Cytoplasm	kinase
0.561	10.637	1.41e-05	1418004_a_at		TMEM176B	transmembrane protein 176B	Other	other
0.56	10.52	1.2e-05	1416066_at		CD9	CD9 molecule	Plasma Membrane	other
0.558	9.96	0.000245	1426642_at		FN1	fibronectin 1	Extracellular Space	enzyme	ocriplasmin
0.557	6.887	4.5e-05	1416435_at		LTBR	lymphotoxin beta receptor (TNFR superfamily, member 3)	Plasma Membrane	transmembrane receptor
0.554	6.204	1.58e-05	1447813_x_at		SLA	Src-like-adaptor	Plasma Membrane	other
0.553	6.037	0.000139	1421009_at		RSAD2	radical S-adenosyl methionine domain containing 2	Cytoplasm	enzyme
0.55	7.383	9.39e-05	1431056_a_at	D	LPL	lipoprotein lipase	Cytoplasm	enzyme	atorvastatin/niacin, nicotinic acid/pioglitazone, nicotinic acid, tyloxapol, lovastatin/niacin
0.548	5.869	0.000128	1422628_at		FAM111A	family with sequence similarity 111, member A	Nucleus	other
0.548	9.066	0.000228	1426397_at		TGFBR2	transforming growth factor, beta receptor II (70/80kDa)	Plasma Membrane	kinase
0.547	10.946	5.4e-06	1422552_at		RPRM	reprimo, TP53 dependent G2 arrest mediator candidate	Cytoplasm	other
0.542	7.261	1.12e-05	1450876_at	D	CFH	complement factor H	Extracellular Space	other
0.541	7.932	0.000155	1426677_at		FLNA	filamin A, alpha	Cytoplasm	other
0.54	6.994	4.77e-05	1448613_at		ECM1	extracellular matrix protein 1	Extracellular Space	transporter
0.538	8.562	1.44e-05	1438200_at	D	SULF1	sulfatase 1	Cytoplasm	enzyme
0.534	9.345	9.04e-06	1450914_at		PPP1R14B	protein phosphatase 1, regulatory (inhibitor) subunit 14B	Cytoplasm	phosphatase
0.533	10.857	2.28e-05	1426724_at	D	CNN3	calponin 3, acidic	Cytoplasm	other
0.533	12.244	5.27e-05	1425546_a_at		TF	transferrin	Extracellular Space	transporter
0.532	8.484	0.00016	1418392_a_at		GBP4	guanylate binding protein 4	Cytoplasm	enzyme
0.531	5.963	0.00368	1433512_at		FLI1	Fli-1 proto-oncogene, ETS transcription factor	Nucleus	transcription regulator
0.527	8.124	1.71e-06	1428786_at		NCKAP1L	NCK-associated protein 1-like	Plasma Membrane	other
0.527	8.304	3.16e-06	1450034_at	D	STAT1	signal transducer and activator of transcription 1, 91kDa	Nucleus	transcription regulator
0.525	8.103	0.00121	1448797_at		ELK3	ELK3, ETS-domain protein (SRF accessory protein 2)	Nucleus	transcription regulator
0.523	9.105	1.24e-06	1456003_a_at	D	SLC1A4	solute carrier family 1 (glutamate/neutral amino acid transporter), member 4	Plasma Membrane	transporter	riluzole
0.522	6.943	0.000152	1416897_at		PARP9	poly (ADP-ribose) polymerase family, member 9	Nucleus	enzyme
0.521	7.869	0.000472	1434695_at		DTL	denticleless E3 ubiquitin protein ligase homolog (Drosophila)	Nucleus	other
0.52	7.616	0.00234	1428781_at		DMKN	dermokine	Extracellular Space	other
0.518	8.603	1.3e-06	1418895_at		SKAP2	src kinase associated phosphoprotein 2	Cytoplasm	other
0.515	8.233	0.00016	1454822_x_at	D	APCDD1	adenomatosis polyposis coli down-regulated 1	Plasma Membrane	other
0.515	8.099	0.00167	1443814_x_at		CTSH	cathepsin H	Cytoplasm	peptidase
0.515	8.288	0.00185	1439571_at		E230008J23Rik	RIKEN cDNA E230008J23 gene	Other	other
0.513	8.348	0.000164	1421897_at	D	ELK1	ELK1, member of ETS oncogene family	Nucleus	transcription regulator
0.513	9.103	1.14e-05	1436905_x_at	D	LAPTM5	lysosomal protein transmembrane 5	Plasma Membrane	other
0.511	10.476	4.32e-06	1447676_x_at	D	S100A16	S100 calcium binding protein A16	Nucleus	other
0.51	11.194	1.73e-06	1417654_at	D	SDC4	syndecan 4	Plasma Membrane	other
0.508	9.776	0.00012	1417409_at		JUN	jun proto-oncogene	Nucleus	transcription regulator
0.507	7.988	0.000423	1416034_at	D	Cd24a	CD24a antigen	Plasma Membrane	other
0.506	7.443	4.75e-05	1421217_a_at		LGALS9B	lectin, galactoside-binding, soluble, 9B	Other	other
0.501	8.637	6.66e-05	1424186_at		CCDC80	coiled-coil domain containing 80	Nucleus	other
0.501	8.517	1.94e-05	1417141_at		Igtp	interferon gamma induced GTPase	Cytoplasm	enzyme
0.5	10.535	7.23e-06	1435429_x_at	D	RPS27L	ribosomal protein S27-like	Other	translation regulator
0.499	8.424	0.00244	1418296_at		FXYD5	FXYD domain containing ion transport regulator 5	Plasma Membrane	ion channel
0.498	11.12	7.94e-06	1418364_a_at	D	FTL	ferritin, light polypeptide	Cytoplasm	enzyme
0.495	7.602	1.87e-05	1449419_at		DOCK8	dedicator of cytokinesis 8	Cytoplasm	other
0.493	9.84	0.00106	1448503_at		MCL1	myeloid cell leukemia 1	Cytoplasm	transporter
0.487	7.023	2.61e-05	1435036_at		ASPG	asparaginase	Other	enzyme
0.486	10.312	0.00151	1450644_at		ZFP36L1	ZFP36 ring finger protein-like 1	Nucleus	transcription regulator
0.471	7.888	0.000444	1419905_s_at		HPGD	hydroxyprostaglandin dehydrogenase 15-(NAD)	Cytoplasm	enzyme
0.469	8.985	1.03e-05	1460220_a_at	D	CSF1	colony stimulating factor 1 (macrophage)	Extracellular Space	cytokine
0.465	8.237	6.37e-05	1417379_at	D	IQGAP1	IQ motif containing GTPase activating protein 1	Cytoplasm	other
0.464	8.733	0.00376	1419647_a_at		IER3	immediate early response 3	Cytoplasm	other
0.462	7.727	0.000128	1435606_at		GPC2	glypican 2	Plasma Membrane	other
0.461	8.193	0.000302	1439066_at		ANGPT1	angiopoietin 1	Extracellular Space	growth factor	trebananib
0.46	8.334	5.02e-05	1434121_at		LGI4	leucine-rich repeat LGI family, member 4	Extracellular Space	other
0.458	7.15	0.000154	1416564_at		SOX7	SRY (sex determining region Y)-box 7	Nucleus	transcription regulator
0.454	7.125	6.08e-05	1430447_a_at	D	LAIR1	leukocyte-associated immunoglobulin-like receptor 1	Plasma Membrane	transmembrane receptor
0.454	8.565	0.00197	1416214_at		MCM4	minichromosome maintenance complex component 4	Nucleus	enzyme
0.452	7.556	0.000894	1435803_a_at		EIF4E2	eukaryotic translation initiation factor 4E family member 2	Cytoplasm	translation regulator
0.451	11.263	0.000235	1448411_at		WFS1	Wolfram syndrome 1 (wolframin)	Cytoplasm	enzyme
0.45	9.228	0.000126	1435394_s_at		RHOC	ras homolog family member C	Plasma Membrane	enzyme
0.449	7.69	0.000973	1457774_at	D	NTPCR	nucleoside-triphosphatase, cancer-related	Other	other
0.447	8.007	0.00014	1439462_x_at	D	TMED10	transmembrane emp24-like trafficking protein 10 (yeast)	Cytoplasm	transporter
0.446	8.707	3.77e-06	1448550_at		LBP	lipopolysaccharide binding protein	Plasma Membrane	transporter
0.446	9.563	1.33e-05	1424424_at		SLC39A1	solute carrier family 39 (zinc transporter), member 1	Plasma Membrane	transporter
0.444	7.877	1.18e-05	1416950_at		TNFAIP8	tumor necrosis factor, alpha-induced protein 8	Cytoplasm	other
0.44	7.049	0.00134	1437451_at		ECSCR	endothelial cell surface expressed chemotaxis and apoptosis regulator	Other	other
0.438	8.9	1.17e-05	1433933_s_at		SLCO2B1	solute carrier organic anion transporter family, member 2B1	Plasma Membrane	transporter
0.437	8.249	7.22e-05	1428132_at		CDC42SE1	CDC42 small effector 1	Plasma Membrane	other
0.437	8.56	0.000278	1424783_a_at		UGT1A9 (includes others)	UDP glucuronosyltransferase 1 family, polypeptide A8	Cytoplasm	enzyme
0.435	6.901	0.00097	1421547_at		CD180	CD180 molecule	Plasma Membrane	other
0.435	8.197	1.6e-06	1452246_at		OSTF1	osteoclast stimulating factor 1	Nucleus	transcription regulator
0.431	7.033	0.000122	1423358_at		ECE2	endothelin converting enzyme 2	Plasma Membrane	peptidase
0.431	10.591	8.28e-06	1448883_at		LGMN	legumain	Cytoplasm	peptidase
0.431	4.928	0.00131	1451548_at		UPP2	uridine phosphorylase 2	Cytoplasm	enzyme
0.429	8.29	0.000828	1417018_at		EFEMP2	EGF containing fibulin-like extracellular matrix protein 2	Extracellular Space	other
0.429	8.763	0.000315	1423505_at		TAGLN	transgelin	Cytoplasm	other
0.428	8.793	6.31e-06	1456945_at		NUDT6	nudix (nucleoside diphosphate linked moiety X)-type motif 6	Extracellular Space	growth factor
0.425	5.829	0.000126	1448899_s_at		RAD51AP1	RAD51 associated protein 1	Nucleus	other
0.424	9.391	7.54e-06	1455824_x_at	D	STT3A	STT3A, subunit of the oligosaccharyltransferase complex (catalytic)	Plasma Membrane	enzyme
0.423	8.581	0.000145	1448270_at		DDX21	DEAD (Asp-Glu-Ala-Asp) box helicase 21	Nucleus	enzyme
0.422	10.08	1.23e-05	1456085_x_at	D	CD151	CD151 molecule (Raph blood group)	Plasma Membrane	other
0.422	13.458	0.000194	1422557_s_at		Mt1	metallothionein 1	Cytoplasm	other
0.421	8.217	0.000785	1448383_at		MMP14	matrix metallopeptidase 14 (membrane-inserted)	Extracellular Space	peptidase	marimastat
0.421	6.528	9.01e-05	1429524_at		MYO1F	myosin IF	Cytoplasm	other
0.42	8.351	1.24e-05	1449852_a_at		EHD4	EH-domain containing 4	Plasma Membrane	enzyme
0.42	7.462	0.000472	1416544_at		EZH2	enhancer of zeste homolog 2 (Drosophila)	Nucleus	transcription regulator
0.42	7.643	0.0016	1437828_s_at		WDR46	WD repeat domain 46	Nucleus	enzyme
0.419	11.687	7.66e-06	1451310_a_at		CTSV	cathepsin V	Cytoplasm	peptidase
0.419	8.609	1.87e-05	1423706_a_at	D	PGD	phosphogluconate dehydrogenase	Cytoplasm	enzyme
0.419	6.251	0.000197	1434980_at		PIK3R5	phosphoinositide-3-kinase, regulatory subunit 5	Cytoplasm	kinase
0.418	5.745	0.000628	1424202_at		SEH1L	SEH1-like (S. cerevisiae)	Cytoplasm	transporter
0.418	7.597	0.00254	1419879_s_at		TRIM25	tripartite motif containing 25	Cytoplasm	transcription regulator
0.416	8.535	0.0013	1424950_at	D	SOX9	SRY (sex determining region Y)-box 9	Nucleus	transcription regulator
0.415	6.226	0.00242	1422875_at		CD84	CD84 molecule	Plasma Membrane	other
0.415	7.688	4.04e-05	1448402_at		TLN1	talin 1	Plasma Membrane	other
0.413	9.876	0.000514	1416762_at	D	S100A10	S100 calcium binding protein A10	Cytoplasm	other
0.408	8.058	0.000311	1438112_at		9430021M05Rik	RIKEN cDNA 9430021M05 gene	Other	other
0.408	8.026	0.00119	1460603_at		SAMD9L	sterile alpha motif domain containing 9-like	Extracellular Space	other
0.407	11.827	1.45e-06	1448591_at		CTSS	cathepsin S	Cytoplasm	peptidase
0.407	8.048	0.000792	1419455_at		IL10RB	interleukin 10 receptor, beta	Plasma Membrane	transmembrane receptor
0.405	7.754	0.00105	1425519_a_at		CD74	CD74 molecule, major histocompatibility complex, class II invariant chain	Plasma Membrane	transmembrane receptor
0.405	6.675	4.49e-06	1424981_at	D	NLN	neurolysin (metallopeptidase M3 family)	Cytoplasm	peptidase
0.405	10.837	2.65e-05	1426851_a_at	D	NOV	nephroblastoma overexpressed	Extracellular Space	growth factor
0.404	7.361	0.00116	1450199_a_at		STAB1	stabilin 1	Plasma Membrane	transporter
0.402	8.707	4.93e-05	1424874_a_at		PTBP1	polypyrimidine tract binding protein 1	Nucleus	enzyme
0.401	7.712	0.0012	1448592_at		CRTAP	cartilage associated protein	Extracellular Space	other
0.4	9.943	0.000265	1417420_at	D	CCND1	cyclin D1	Nucleus	transcription regulator	arsenic trioxide/tretinoin, arsenic trioxide/daunorubicin/tretinoin, arsenic trioxide/gemtuzumab ozogamicin/tretinoin, arsenic trioxide/idarubicin/tretinoin, arsenic trioxide
0.399	8.958	0.000439	1438320_s_at	D	MCM7	minichromosome maintenance complex component 7	Nucleus	enzyme
0.399	8.401	0.00167	1415892_at		SGPL1	sphingosine-1-phosphate lyase 1	Cytoplasm	enzyme
0.398	7.622	0.000628	1416827_at		TBXAS1	thromboxane A synthase 1 (platelet)	Plasma Membrane	enzyme	ridogrel
0.397	5.685	0.00168	1437760_at		GALNT12	polypeptide N-acetylgalactosaminyltransferase 12	Cytoplasm	enzyme
0.397	7.333	0.000844	1449041_a_at		TRIP6	thyroid hormone receptor interactor 6	Extracellular Space	cytokine
0.395	8.536	0.000136	1417013_at	D	HSPB8	heat shock 22kDa protein 8	Cytoplasm	kinase
0.392	8.685	0.000173	1458370_at		BMP2K	BMP2 inducible kinase	Nucleus	kinase
0.392	7.398	0.00144	1429270_a_at		SYCE2	synaptonemal complex central element protein 2	Nucleus	other
0.391	6.66	2.11e-05	1434929_at		BC035044	cDNA sequence BC035044	Other	other
0.389	8.559	2.59e-05	1416968_a_at		HSD3B7	hydroxy-delta-5-steroid dehydrogenase, 3 beta- and steroid delta-isomerase 7	Cytoplasm	enzyme
0.388	9.242	2.54e-06	1441081_a_at		1110038B12Rik	RIKEN cDNA 1110038B12 gene	Other	other
0.387	9.017	0.00194	1438168_x_at		DDX39A	DEAD (Asp-Glu-Ala-Asp) box polypeptide 39A	Nucleus	enzyme
0.387	6.864	0.00207	1451683_x_at	D	HLA-A	major histocompatibility complex, class I, A	Plasma Membrane	other
0.387	11.597	0.000112	1420859_at	D	PKIA	protein kinase (cAMP-dependent, catalytic) inhibitor alpha	Cytoplasm	other
0.387	6.721	0.000164	1451791_at	D	TFPI	tissue factor pathway inhibitor (lipoprotein-associated coagulation inhibitor)	Extracellular Space	other	dalteparin
0.385	7.508	0.00085	1451362_at		RAB29	RAB29, member RAS oncogene family	Plasma Membrane	enzyme
0.385	7.192	0.000449	1450697_at		SLC30A7	solute carrier family 30 (zinc transporter), member 7	Cytoplasm	transporter
0.384	9.005	0.000143	1451716_at		MAFB	v-maf avian musculoaponeurotic fibrosarcoma oncogene homolog B	Nucleus	other
0.383	9.47	2.79e-05	1448967_at		NIPSNAP3A	nipsnap homolog 3A (C. elegans)	Other	other
0.383	6.875	0.000798	1448786_at		PLBD1	phospholipase B domain containing 1	Extracellular Space	other
0.381	7.133	0.00164	1417457_at		CKS2	CDC28 protein kinase regulatory subunit 2	Other	kinase
0.38	6.802	0.000731	1418099_at		TNFRSF1B	tumor necrosis factor receptor superfamily, member 1B	Plasma Membrane	transmembrane receptor
0.379	8.945	0.000144	1433969_at		CDKL4	cyclin-dependent kinase-like 4	Nucleus	kinase
0.379	10.123	1.48e-05	1422186_s_at	D	Cyb5r3	cytochrome b5 reductase 3	Other	enzyme
0.379	7.116	0.000115	1455915_at		GALNT4	polypeptide N-acetylgalactosaminyltransferase 4	Cytoplasm	enzyme
0.378	7.999	2.67e-05	1416627_at		SPINT1	serine peptidase inhibitor, Kunitz type 1	Extracellular Space	other
0.377	7.764	6.29e-05	1426926_at		PLCG2	phospholipase C, gamma 2 (phosphatidylinositol-specific)	Cytoplasm	enzyme
0.373	5.536	0.00163	1447803_x_at		CAPG	capping protein (actin filament), gelsolin-like	Nucleus	other
0.372	7.535	0.000345	1425860_x_at	D	CKLF	chemokine-like factor	Extracellular Space	cytokine
0.372	8.489	1.45e-05	1437811_x_at	D	COTL1	coactosin-like F-actin binding protein 1	Cytoplasm	other
0.371	5.704	0.000335	1438676_at		GBP6	guanylate binding protein family, member 6	Cytoplasm	enzyme
0.371	6.523	0.000438	1449399_a_at		IL1B	interleukin 1, beta	Extracellular Space	cytokine	canakinumab, gevokizumab, canakinumab/INS, gallium nitrate
0.37	5.104	0.000454	1452242_at		CEP55	centrosomal protein 55kDa	Cytoplasm	other
0.369	6.86	0.000518	1417777_at		PTGR1	prostaglandin reductase 1	Cytoplasm	enzyme
0.368	5.823	0.000935	1416295_a_at		IL2RG	interleukin 2 receptor, gamma	Plasma Membrane	transmembrane receptor	aldesleukin, denileukin diftitox
0.367	6.707	1.8e-05	1433768_at		PALLD	palladin, cytoskeletal associated protein	Plasma Membrane	other
0.367	10.078	0.000106	1423732_at		TRAM1	translocation associated membrane protein 1	Cytoplasm	other
0.366	9.279	0.00025	1429269_at		FLJ22184	putative uncharacterized protein FLJ22184	Other	other
0.366	6.059	0.00084	1434322_at		MICALL2	MICAL-like 2	Cytoplasm	other
0.366	8.418	0.00112	1455134_at		TMEM245	transmembrane protein 245	Other	other
0.363	12.036	6.2e-05	1437874_s_at	D	HEXB	hexosaminidase B (beta polypeptide)	Cytoplasm	enzyme
0.363	7.988	0.000237	1416641_at		LIG1	ligase I, DNA, ATP-dependent	Nucleus	enzyme
0.362	10.851	0.00012	1434503_s_at	D	LAMP2	lysosomal-associated membrane protein 2	Plasma Membrane	enzyme
0.361	9.737	1.18e-05	1417189_at		PSME2	proteasome (prosome, macropain) activator subunit 2 (PA28 beta)	Cytoplasm	peptidase
0.359	7.227	0.000186	1416757_at		ZWILCH	zwilch kinetochore protein	Nucleus	other
0.358	6.657	0.00131	1424378_at		LDLRAP1	low density lipoprotein receptor adaptor protein 1	Cytoplasm	transporter
0.357	9.953	0.000375	1437171_x_at	D	GSN	gelsolin	Extracellular Space	other
0.353	9.661	0.000186	1448148_at	D	GRN	granulin	Extracellular Space	growth factor
0.351	6.94	0.00187	1418726_a_at		TNNT2	troponin T type 2 (cardiac)	Cytoplasm	other
0.349	8.167	4.86e-05	1436119_at		ALDH1L2	aldehyde dehydrogenase 1 family, member L2	Cytoplasm	enzyme
0.349	7.984	0.00202	1416808_at		NID1	nidogen 1	Extracellular Space	other
0.347	7.168	0.000531	1418396_at		GPSM3	G-protein signaling modulator 3	Cytoplasm	other
0.347	6.621	0.00122	1428639_at		LIN9	lin-9 homolog (C. elegans)	Nucleus	other
0.346	7.181	0.00327	1417540_at		ELF1	E74-like factor 1 (ets domain transcription factor)	Nucleus	transcription regulator
0.345	10.6	0.000761	1416138_at	D	ANXA7	annexin A7	Plasma Membrane	ion channel
0.345	12.285	1.13e-05	1448808_a_at		NME2	NME/NM23 nucleoside diphosphate kinase 2	Nucleus	kinase
0.345	7.879	0.00272	1416158_at		NR2F2	nuclear receptor subfamily 2, group F, member 2	Nucleus	ligand-dependent nuclear receptor
0.344	7.953	0.000549	1416925_at	D	KPNB1	karyopherin (importin) beta 1	Nucleus	transporter
0.344	8.675	0.000895	1455623_at		MFSD4	major facilitator superfamily domain containing 4	Other	other
0.34	8.863	3.1e-05	1429556_at		TEAD1	TEA domain family member 1 (SV40 transcriptional enhancer factor)	Nucleus	transcription regulator
0.337	10.842	9.88e-06	1417327_at		CAV2	caveolin 2	Plasma Membrane	other
0.336	6.579	2.99e-05	1437937_at		ACKR2	atypical chemokine receptor 2	Plasma Membrane	G-protein coupled receptor
0.336	7.508	0.00352	1422615_at		MAP4K4	mitogen-activated protein kinase kinase kinase kinase 4	Cytoplasm	kinase
0.336	6.571	0.000626	1429295_s_at		TRIP13	thyroid hormone receptor interactor 13	Cytoplasm	transcription regulator
0.334	10.203	0.000511	1450850_at		EZR	ezrin	Plasma Membrane	other
0.332	8.19	0.00316	1418289_at		Nes	nestin	Cytoplasm	other
0.331	8.27	0.00356	1441855_x_at		CXCL2	chemokine (C-X-C motif) ligand 2	Extracellular Space	cytokine
0.33	8.591	0.00105	1435517_x_at	D	RALB	v-ral simian leukemia viral oncogene homolog B	Cytoplasm	enzyme
0.33	11.397	0.000121	1435519_at		RAP1B	RAP1B, member of RAS oncogene family	Cytoplasm	enzyme
0.33	9.327	0.00029	1415828_a_at	D	SERP1	stress-associated endoplasmic reticulum protein 1	Cytoplasm	other
0.329	8.32	0.000731	1417400_at		RAI14	retinoic acid induced 14	Nucleus	transcription regulator
0.325	7.022	0.00127	1460366_at		EML3	echinoderm microtubule associated protein like 3	Other	other
0.325	6.541	0.000782	1430353_at		GLIS3	GLIS family zinc finger 3	Nucleus	transcription regulator
0.325	11.626	0.000661	1424175_at		TEF	thyrotrophic embryonic factor	Nucleus	transcription regulator
0.324	8.929	0.000426	1451112_s_at		DAP	death-associated protein	Cytoplasm	transcription regulator
0.324	10.328	0.000355	1437099_x_at	D	HNRNPF	heterogeneous nuclear ribonucleoprotein F	Nucleus	other
0.324	10.309	3.21e-05	1438376_s_at	D	TRIM27	tripartite motif containing 27	Nucleus	transcription regulator
0.323	8.213	0.000533	1422622_at		NOS3	nitric oxide synthase 3 (endothelial cell)	Cytoplasm	enzyme	5,6,7,8-tetrahydrobiopterin, GW 273629, targinine
0.322	8.786	0.000128	1452545_a_at	D	ITGB1	integrin, beta 1 (fibronectin receptor, beta polypeptide, antigen CD29 includes MDF2, MSK12)	Plasma Membrane	transmembrane receptor
0.321	8.031	0.00125	1439189_at		FNIP2	folliculin interacting protein 2	Cytoplasm	other
0.32	11.66	3.88e-05	1449018_at		PFN1	profilin 1	Cytoplasm	other
0.319	7.614	0.000697	1421223_a_at		ANXA4	annexin A4	Plasma Membrane	other
0.319	8.819	0.00222	1418206_at		SDF2L1	stromal cell-derived factor 2-like 1	Cytoplasm	other
0.318	6.516	0.000382	1419703_at		COL5A3	collagen, type V, alpha 3	Extracellular Space	other	collagenase clostridium histolyticum
0.318	7.432	0.00386	1423904_a_at		Pvr	poliovirus receptor	Plasma Membrane	other
0.317	7.283	0.00354	1455287_at		CDK6	cyclin-dependent kinase 6	Nucleus	kinase	palbociclib, LEE011, alvocidib
0.317	8.266	0.00187	1426774_at		PARP12	poly (ADP-ribose) polymerase family, member 12	Nucleus	other
0.316	10.817	2.23e-05	1422433_s_at		IDH1	isocitrate dehydrogenase 1 (NADP+), soluble	Cytoplasm	enzyme
0.316	7.781	0.000152	1416896_at		RPS6KA1	ribosomal protein S6 kinase, 90kDa, polypeptide 1	Cytoplasm	kinase
0.314	9.196	0.000733	1450048_a_at		IDH2	isocitrate dehydrogenase 2 (NADP+), mitochondrial	Cytoplasm	enzyme
0.314	10.33	4.55e-05	1438024_at		MCUR1	mitochondrial calcium uniporter regulator 1	Cytoplasm	other
0.314	9.773	0.00214	1426204_a_at		OPRL1	opiate receptor-like 1	Plasma Membrane	G-protein coupled receptor	ZP120
0.313	5.89	0.00125	1418264_at		CENPK	centromere protein K	Nucleus	other
0.313	10.261	0.000104	1455719_at		TUBB	tubulin, beta class I	Cytoplasm	other	ixabepilone, colchicine/probenecid, brentuximab vedotin, cabazitaxel, 6-mercaptopurine/methotrexate/prednisone/vincristine, dexamethasone/doxorubicin/vincristine, gemcitabine/vinorelbine, irinotecan/vincristine, trastuzumab/vinorelbine, methotrexate/vinorelbine, vinorelbine, vincristine, podophyllotoxin, colchicine
0.312	8.59	0.00168	1423792_a_at		CMTM6	CKLF-like MARVEL transmembrane domain containing 6	Extracellular Space	cytokine
0.311	8.311	0.000729	1431146_a_at		CPNE8	copine VIII	Cytoplasm	other
0.31	10.357	0.000786	1448807_at		HRH3	histamine receptor H3	Plasma Membrane	G-protein coupled receptor	GSK239512, tesmilifene, triprolidine, betahistine, buclizine
0.309	7.813	4.31e-05	1424990_at	D	ORAI1	ORAI calcium release-activated calcium modulator 1	Plasma Membrane	ion channel
0.308	8.54	0.000406	1418448_at		RRAS	related RAS viral (r-ras) oncogene homolog	Cytoplasm	enzyme
0.308	11.729	5.69e-05	1427504_s_at	D	SRSF2	serine/arginine-rich splicing factor 2	Nucleus	transcription regulator
0.306	5.922	0.000457	1447553_x_at	D	RIC3	RIC3 acetylcholine receptor chaperone	Cytoplasm	other
0.304	8.726	0.000296	1448151_at	D	ELAVL1	ELAV like RNA binding protein 1	Cytoplasm	other
0.304	9.545	0.000978	1421817_at		GSR	glutathione reductase	Cytoplasm	enzyme	carmustine/prednisone, carmustine
0.304	7.049	0.0014	1423543_at		SWAP70	SWAP switching B-cell complex 70kDa subunit	Cytoplasm	other
0.303	8.035	0.000651	1458386_at		C030009J22Rik	RIKEN cDNA C030009J22 gene	Other	other
0.299	9.785	0.00164	1425506_at	D	MYLK	myosin light chain kinase	Cytoplasm	kinase
0.297	8.931	0.00268	1428828_at	D	RPAIN	RPA interacting protein	Nucleus	other
0.297	8.762	0.000658	1426434_at		TMEM43	transmembrane protein 43	Nucleus	other
0.296	6.953	0.0025	1422437_at		COL5A2	collagen, type V, alpha 2	Extracellular Space	other	collagenase clostridium histolyticum
0.296	7.115	0.000406	1425649_at		SLC39A14	solute carrier family 39 (zinc transporter), member 14	Plasma Membrane	transporter
0.295	9.485	0.00035	1428428_at		ABHD11	abhydrolase domain containing 11	Cytoplasm	enzyme
0.295	8.354	4.95e-05	1416457_at		DDAH2	dimethylarginine dimethylaminohydrolase 2	Cytoplasm	enzyme
0.294	10.939	0.00134	1416003_at		CLDN11	claudin 11	Plasma Membrane	other
0.294	7.044	0.00228	1422033_a_at		CNTF	ciliary neurotrophic factor	Extracellular Space	cytokine
0.293	9.149	0.00066	1434313_at		CCDC126	coiled-coil domain containing 126	Other	other
0.293	8.604	0.00124	1427447_a_at		TRIOBP	TRIO and F-actin binding protein	Nucleus	other
0.291	10.031	0.000187	1421529_a_at		TXNRD1	thioredoxin reductase 1	Cytoplasm	enzyme	arsenic trioxide/tretinoin, arsenic trioxide/daunorubicin/tretinoin, arsenic trioxide/gemtuzumab ozogamicin/tretinoin, arsenic trioxide/idarubicin/tretinoin, arsenic trioxide
0.289	7.009	0.000107	1426818_at		ARRDC4	arrestin domain containing 4	Other	other
0.289	5.995	0.00356	1450677_at		CHEK1	checkpoint kinase 1	Nucleus	kinase	UCN-01
0.289	7.407	0.00256	1436448_a_at		PTGS1	prostaglandin-endoperoxide synthase 1 (prostaglandin G/H synthase and cyclooxygenase)	Cytoplasm	enzyme	acetaminophen/pentazocine, acetaminophen/clemastine/pseudoephedrine, aspirin/butalbital/caffeine, acetaminophen/caffeine/dihydrocodeine, aspirin/hydrocodone, aspirin/oxycodone, acetaminophen/aspirin/caffeine, aspirin/pravastatin, acetaminophen/dexbrompheniramine/pseudoephedrine, aspirin/meprobamate, aspirin/caffeine/propoxyphene, aspirin/butalbital/caffeine/codeine, aspirin/caffeine/dihydrocodein…
0.289	13.585	0.00238	AFFX-18SRNAMur/X00686_M_at		Rn18s	18S ribosomal RNA	Other	other
0.289	10.705	8.96e-05	1426712_at		SLC6A15	solute carrier family 6 (neutral amino acid transporter), member 15	Plasma Membrane	transporter
0.288	6.175	0.00117	1429985_at		5430439G13Rik	RIKEN cDNA 5430439G13 gene	Other	other
0.288	7.347	0.000878	1451103_at		HAUS4	HAUS augmin-like complex, subunit 4	Cytoplasm	other
0.286	8.725	0.000593	1449839_at		CASP3	caspase 3, apoptosis-related cysteine peptidase	Cytoplasm	peptidase	emricasan
0.286	6.686	0.00126	1447635_at		PRKAR1A	protein kinase, cAMP-dependent, regulatory, type I, alpha	Cytoplasm	kinase
0.286	9.881	0.00348	1418704_at		S100A13	S100 calcium binding protein A13	Cytoplasm	other
0.285	9.238	0.00265	1435092_at		ARL4A	ADP-ribosylation factor-like 4A	Nucleus	enzyme
0.285	9.426	0.000147	1452220_at		DOCK1	dedicator of cytokinesis 1	Cytoplasm	other
0.285	7.045	0.00185	1447837_x_at		POLH	polymerase (DNA directed), eta	Nucleus	enzyme
0.285	8.736	0.000509	1417696_at		SOAT1	sterol O-acyltransferase 1	Cytoplasm	enzyme	pactimibe, ezetimibe/fluvastatin, atorvastatin/ezetimibe, ezetimibe/rosuvastatin, ezetimibe/fenofibrate, ezetimibe/simvastatin, ezetimibe, hesperetin
0.284	10.852	0.0002	1432273_a_at		ACKR1	atypical chemokine receptor 1 (Duffy blood group)	Plasma Membrane	G-protein coupled receptor
0.284	9.085	0.000176	1431299_a_at		PPP1R18	protein phosphatase 1, regulatory subunit 18	Other	other
0.281	9.207	0.00115	1421048_a_at		YPEL1	yippee-like 1 (Drosophila)	Nucleus	enzyme
0.28	7.873	0.00206	1449192_at		ATF7IP	activating transcription factor 7 interacting protein	Nucleus	transcription regulator
0.279	7.438	0.00206	1458295_at		BC038331	cDNA sequence BC038331	Other	other
0.279	6.818	0.00273	1418890_a_at		RAB3D	RAB3D, member RAS oncogene family	Cytoplasm	enzyme
0.278	10.499	0.000226	1417082_at		Anp32b	acidic (leucine-rich) nuclear phosphoprotein 32 family, member B	Nucleus	other
0.277	5.438	0.00122	1442849_at		LRP1	low density lipoprotein receptor-related protein 1	Plasma Membrane	transmembrane receptor
0.276	9.415	0.00161	1455308_at	D	ANO6	anoctamin 6	Plasma Membrane	ion channel
0.276	7.679	8.8e-05	1428483_a_at	D	MIS18A	MIS18 kinetochore protein A	Nucleus	other
0.276	11.697	0.000999	1417947_at		PCNA	proliferating cell nuclear antigen	Nucleus	enzyme
0.275	7.879	0.00207	1453301_a_at		ALKBH4	alkB, alkylation repair homolog 4 (E. coli)	Cytoplasm	enzyme
0.275	8.753	0.00339	1448635_at	D	SMC2	structural maintenance of chromosomes 2	Nucleus	transporter
0.274	9.332	0.00114	1439436_x_at		INCENP	inner centromere protein antigens 135/155kDa	Nucleus	other
0.274	8.414	0.00321	1436037_at		ITGA4	integrin, alpha 4 (antigen CD49D, alpha 4 subunit of VLA-4 receptor)	Plasma Membrane	transmembrane receptor	natalizumab
0.274	9.245	0.000375	1460053_at		SMYD4	SET and MYND domain containing 4	Other	other
0.273	9.89	0.000872	1435800_a_at		YBX3	Y box binding protein 3	Nucleus	transcription regulator
0.272	7.78	0.000359	1436104_a_at		Ccdc74a	coiled-coil domain containing 74A	Other	other
0.272	8.616	0.00292	1427176_s_at		SYNE4	spectrin repeat containing, nuclear envelope family member 4	Nucleus	other
0.27	8.915	0.000657	1448623_at		TMEM123	transmembrane protein 123	Plasma Membrane	other
0.269	8.273	0.00235	1436158_at		EIF4EBP2	eukaryotic translation initiation factor 4E binding protein 2	Cytoplasm	other
0.268	7.142	0.00151	1429156_at		CENPW	centromere protein W	Nucleus	other
0.268	8.442	0.00102	1451161_a_at		EMR1	egf-like module containing, mucin-like, hormone receptor-like 1	Plasma Membrane	G-protein coupled receptor
0.268	8.217	0.00258	1423521_at		LMNB1	lamin B1	Nucleus	other
0.268	8.156	0.00112	1418369_at		PRIM1	primase, DNA, polypeptide 1 (49kDa)	Nucleus	enzyme	cytarabine/fludarabine phosphate, cyclophosphamide/fludarabine phosphate/rituximab, cytarabine/filgrastim/fludarabine phosphate, fludarabine phosphate/rituximab, dexamethasone/fludarabine phosphate/mitoxantrone, alemtuzumab/cyclophosphamide/fludarabine phosphate/rituximab, alemtuzumab/fludarabine phosphate, cytarabine/fludarabine phosphate/oxaliplatin/rituximab, cyclophosphamide/fludarabine phosp…
0.267	10.967	0.000513	1436699_x_at	D	RPL18	ribosomal protein L18	Cytoplasm	other
0.267	8.405	0.000228	1427382_a_at		SUV39H1	suppressor of variegation 3-9 homolog 1 (Drosophila)	Nucleus	enzyme
0.266	7.167	0.000629	1444112_at		Gm15417	predicted gene 15417	Other	other
0.265	8.481	0.000113	1434518_at		PHKA2	phosphorylase kinase, alpha 2 (liver)	Cytoplasm	kinase
0.264	7.209	0.00249	1452390_at		BRAT1	BRCA1-associated ATM activator 1	Nucleus	other
0.264	10.762	0.000266	1419499_at		GPAM	glycerol-3-phosphate acyltransferase, mitochondrial	Cytoplasm	enzyme
0.264	11.256	7.96e-05	1437465_a_at		P4HB	prolyl 4-hydroxylase, beta polypeptide	Cytoplasm	enzyme
0.264	8.166	0.00343	1416433_at		RPA2	replication protein A2, 32kDa	Nucleus	other
0.263	7.699	0.00167	1418110_a_at		INPP5D	inositol polyphosphate-5-phosphatase, 145kDa	Cytoplasm	phosphatase
0.263	7.961	0.000856	1435262_at		PIGN	phosphatidylinositol glycan anchor biosynthesis, class N	Cytoplasm	enzyme
0.263	5.742	0.00382	1422571_at		THBS2	thrombospondin 2	Extracellular Space	other
0.262	10.324	0.00388	1448919_at		CD302	CD302 molecule	Plasma Membrane	transmembrane receptor
0.261	6.236	0.00114	1447495_at		FANK1	fibronectin type III and ankyrin repeat domains 1	Nucleus	transcription regulator
0.259	8.236	0.00357	1450959_at		AKIP1	A kinase (PRKA) interacting protein 1	Nucleus	other
0.259	9.639	0.00267	1416303_at		LITAF	lipopolysaccharide-induced TNF factor	Nucleus	transcription regulator
0.256	8.09	0.000227	1433748_at		ZDHHC18	zinc finger, DHHC-type containing 18	Cytoplasm	enzyme
0.255	10.56	0.00052	1428116_a_at		DYNLT1	dynein, light chain, Tctex-type 1	Cytoplasm	other
0.255	6.567	0.00335	1431960_at		WWOX	WW domain containing oxidoreductase	Cytoplasm	enzyme
0.253	10.292	0.000723	1417974_at		KPNA4	karyopherin alpha 4 (importin alpha 3)	Nucleus	transporter
0.252	8.734	0.00347	1425676_a_at		ELOVL1	ELOVL fatty acid elongase 1	Cytoplasm	enzyme
0.252	8.147	0.00249	1424577_at		MSTO1	misato 1, mitochondrial distribution and morphology regulator	Cytoplasm	other
0.252	8.328	0.00061	1434258_s_at		PHACTR4	phosphatase and actin regulator 4	Plasma Membrane	other
0.252	7.216	0.00359	1439451_x_at		SLC52A2	solute carrier family 52 (riboflavin transporter), member 2	Plasma Membrane	other
0.251	8.979	0.000262	1451218_at		EDEM1	ER degradation enhancer, mannosidase alpha-like 1	Cytoplasm	enzyme
0.251	8.65	0.00304	1415878_at		RRM1	ribonucleotide reductase M1	Nucleus	enzyme	cytarabine/fludarabine phosphate, gemcitabine/vismodegib, bortezomib/cladribine/rituximab, gemcitabine/paclitaxel, erlotinib/gemcitabine, cyclophosphamide/fludarabine phosphate/rituximab, cladribine/cytarabine/daunorubicin, gemcitabine/oxaliplatin, gemcitabine/vinorelbine, docetaxel/gemcitabine, docetaxel/gemcitabine/vincristine, cladribine/cytarabine/filgrastim, clofarabine/cyclophosphamide/etop…
0.25	9.973	0.00168	1439012_a_at		DCK	deoxycytidine kinase	Nucleus	kinase	cytarabine/fludarabine phosphate, cladribine/cytarabine/daunorubicin, cladribine/cytarabine/filgrastim, cytarabine/filgrastim/fludarabine phosphate, cladribine/cytarabine/filgrastim/mitoxantrone, fludarabine phosphate/rituximab, cladribine/rituximab, cytarabine/filgrastim/fludarabine phosphate/idarubicin, dexamethasone/fludarabine phosphate/mitoxantrone, alemtuzumab/fludarabine phosphate, fludara…
0.249	10.204	0.000137	1417056_at		PSME1	proteasome (prosome, macropain) activator subunit 1 (PA28 alpha)	Cytoplasm	other
0.248	8.317	0.00232	1448404_at	D	SCAMP2	secretory carrier membrane protein 2	Cytoplasm	transporter
0.246	8.594	0.00133	1424160_at		ALG5	ALG5, dolichyl-phosphate beta-glucosyltransferase	Cytoplasm	enzyme
0.245	8.792	0.000196	1426238_at		BMP1	bone morphogenetic protein 1	Extracellular Space	peptidase
0.245	11.186	0.00206	1426799_at		RAB8B	RAB8B, member RAS oncogene family	Cytoplasm	enzyme
0.245	12.581	0.000392	1419441_at		RPLP0	ribosomal protein, large, P0	Cytoplasm	other
0.244	9.849	0.000566	1419568_at		MAPK1	mitogen-activated protein kinase 1	Cytoplasm	kinase	ARRY-438162
0.244	10.918	0.000198	1447320_x_at	D	POLR1D	polymerase (RNA) I polypeptide D, 16kDa	Nucleus	enzyme
0.243	11.462	0.000776	1437226_x_at		MARCKSL1	MARCKS-like 1	Cytoplasm	other
0.243	10.093	0.0018	1438928_x_at		NINJ1	ninjurin 1	Plasma Membrane	other
0.242	7.061	0.00222	1439514_at		A930004D18Rik	RIKEN cDNA A930004D18 gene	Other	other
0.242	8.933	0.000687	1451446_at		ANTXR1	anthrax toxin receptor 1	Plasma Membrane	transmembrane receptor
0.242	10.889	0.000992	1420502_at		SAT1	spermidine/spermine N1-acetyltransferase 1	Cytoplasm	enzyme
0.242	6.694	0.00142	1453815_at		SPC25	SPC25, NDC80 kinetochore complex component	Cytoplasm	other
0.241	10.594	0.000523	1460701_a_at	D	MRPL52	mitochondrial ribosomal protein L52	Cytoplasm	other
0.241	9.375	0.0014	1435500_at		RAB26	RAB26, member RAS oncogene family	Plasma Membrane	enzyme
0.241	8.024	0.000395	1420635_a_at		TCIRG1	T-cell, immune regulator 1, ATPase, H+ transporting, lysosomal V0 subunit A3	Plasma Membrane	enzyme
0.241	11.018	0.000951	1433593_at		YPEL5	yippee-like 5 (Drosophila)	Other	other
0.24	9.091	0.000397	1421075_s_at	D	CYP7B1	cytochrome P450, family 7, subfamily B, polypeptide 1	Cytoplasm	enzyme
0.24	9.501	0.00187	1435363_at		PLEKHG1	pleckstrin homology domain containing, family G (with RhoGef domain) member 1	Extracellular Space	other
0.238	6.964	0.00224	1419172_at		DHFR	dihydrofolate reductase	Nucleus	enzyme	pyrimethamine, trimethoprim, iclaprim, proguanil, methotrexate/ofatumumab, methotrexate/sirolimus/tacrolimus, pralatrexate, abatacept/methotrexate, infliximab/methotrexate, methotrexate/rituximab, 6-mercaptopurine/methotrexate/prednisone/vincristine, golimumab/methotrexate, cisplatin/doxorubicin/methotrexate, cytarabine/methotrexate, cisplatin/doxorubicin/ifosfamide/methotrexate, methotrexate/rit…
0.237	10.603	0.000558	1417204_at		KDELR2	KDEL (Lys-Asp-Glu-Leu) endoplasmic reticulum protein retention receptor 2	Cytoplasm	other
0.235	11.929	0.000896	1416022_at		FABP5	fatty acid binding protein 5 (psoriasis-associated)	Cytoplasm	transporter
0.235	9.429	0.00207	1423431_a_at		MYBBP1A	MYB binding protein (P160) 1a	Nucleus	transcription regulator
0.234	7.031	0.00276	1444137_at		A430108G06Rik	RIKEN cDNA A430108G06 gene	Other	other
0.233	10.778	0.000543	1417083_at		SEC61B	Sec61 beta subunit	Cytoplasm	transporter
0.233	10.425	0.00146	1421594_a_at		SYTL2	synaptotagmin-like 2	Cytoplasm	other
0.233	8.826	0.000568	1418107_at		TCEA2	transcription elongation factor A (SII), 2	Nucleus	transcription regulator
0.232	12.814	0.000207	1418883_a_at		PABPC1	poly(A) binding protein, cytoplasmic 1	Cytoplasm	translation regulator
0.231	8.965	0.000776	1435794_at		5031425E22Rik	RIKEN cDNA 5031425E22 gene	Other	other
0.23	7.845	0.00129	1429307_s_at		LZIC	leucine zipper and CTNNBIP1 domain containing	Other	other
0.228	10.344	0.00378	1456057_x_at		TMEM109	transmembrane protein 109	Cytoplasm	other
0.227	9.995	0.00252	1417125_at		AHCY	adenosylhomocysteinase	Cytoplasm	enzyme	9-(2',3'-dihydroxycyclopent-4'-enyl)adenine, 3-deazaneplanocin, neplanocin A, 3-deazaaristeromycin, cyanovirin-N, 6'-C-methylneplanocin A
0.227	8.995	0.000325	1452272_a_at		GFER	growth factor, augmenter of liver regeneration	Nucleus	enzyme
0.227	10.774	0.000593	1415852_at		IMPDH2	IMP (inosine 5'-monophosphate) dehydrogenase 2	Cytoplasm	enzyme	thioguanine, VX-944, pegintron/ribavirin, interferon alfa-2b/ribavirin, mycophenolate mofetil, mycophenolic acid, ribavirin
0.227	8.006	0.000219	1417300_at		SMPDL3B	sphingomyelin phosphodiesterase, acid-like 3B	Extracellular Space	enzyme
0.225	5.434	0.00373	1449297_at		Casp12	caspase 12	Other	peptidase
0.225	10.692	0.00204	1433866_x_at	D	PRDX1	peroxiredoxin 1	Cytoplasm	enzyme
0.224	8.663	0.00365	1448549_a_at		DPAGT1	dolichyl-phosphate (UDP-N-acetylglucosamine) N-acetylglucosaminephosphotransferase 1 (GlcNAc-1-P transferase)	Cytoplasm	enzyme
0.223	8.903	0.00354	1416683_at		PLXNB2	plexin B2	Plasma Membrane	transmembrane receptor
0.223	10.055	0.000153	1451643_a_at		RAB4B	RAB4B, member RAS oncogene family	Plasma Membrane	enzyme
0.222	7.586	0.00341	1417756_a_at		LSP1	lymphocyte-specific protein 1	Cytoplasm	other
0.221	9.456	0.00234	1439439_x_at		EEF1D	eukaryotic translation elongation factor 1 delta (guanine nucleotide exchange protein)	Cytoplasm	translation regulator
0.221	8.622	0.000839	1418355_at		NUCB2	nucleobindin 2	Nucleus	other
0.218	9.706	0.00124	1428559_at		KDSR	3-ketodihydrosphingosine reductase	Plasma Membrane	enzyme
0.218	11.579	0.000751	1415700_a_at		SSR3	signal sequence receptor, gamma (translocon-associated protein gamma)	Cytoplasm	other
0.218	9.085	0.000793	1421812_at		TAPBP	TAP binding protein (tapasin)	Cytoplasm	transporter
0.217	10.45	0.00234	1456728_x_at		ACO1	aconitase 1, soluble	Cytoplasm	enzyme
0.217	7.368	0.00218	1450059_at		FANCG	Fanconi anemia, complementation group G	Nucleus	other
0.216	10.751	0.000328	1439452_x_at	D	DNPEP	aspartyl aminopeptidase	Cytoplasm	peptidase
0.216	9.865	0.00244	1454060_a_at		NRAS	neuroblastoma RAS viral (v-ras) oncogene homolog	Plasma Membrane	enzyme
0.216	8.366	0.000467	1424611_x_at		TRUB2	TruB pseudouridine (psi) synthase family member 2	Other	enzyme
0.214	11.447	0.000384	1437503_a_at		SHISA5	shisa family member 5	Nucleus	other
0.214	9.923	0.00395	1417162_at		TMBIM1	transmembrane BAX inhibitor motif containing 1	Cytoplasm	other
0.212	7.415	0.00347	1420959_at		ASPH	aspartate beta-hydroxylase	Cytoplasm	enzyme
0.211	9.189	0.00336	1419367_at	D	DECR1	2,4-dienoyl CoA reductase 1, mitochondrial	Cytoplasm	enzyme
0.21	7.405	0.00376	1433841_at		AP5Z1	adaptor-related protein complex 5, zeta 1 subunit	Other	other
0.21	6.542	0.00114	1452294_at		PCDH1	protocadherin 1	Plasma Membrane	other
0.21	11.547	0.000871	1429113_at		PRRT2	proline-rich transmembrane protein 2	Other	other
0.21	9.223	0.000732	1448255_a_at		SURF4	surfeit 4	Cytoplasm	other
0.209	9.735	0.000959	1460177_at		CNDP2	CNDP dipeptidase 2 (metallopeptidase M20 family)	Cytoplasm	peptidase
0.209	10.929	0.000493	1423828_at		FASN	fatty acid synthase	Cytoplasm	enzyme	orlistat, cerulenin
0.208	9.638	0.000693	1448668_a_at		IRAK1	interleukin-1 receptor-associated kinase 1	Plasma Membrane	kinase
0.207	7.981	0.00276	1421385_a_at		MYO7A	myosin VIIA	Cytoplasm	enzyme
0.207	7.95	0.00203	1423452_at		STK17B	serine/threonine kinase 17b	Nucleus	kinase
0.205	11.45	0.000875	1450649_at		GNG10	guanine nucleotide binding protein (G protein), gamma 10	Plasma Membrane	enzyme
0.205	10.05	0.00329	1434881_s_at		KCTD12	potassium channel tetramerization domain containing 12	Plasma Membrane	ion channel
0.205	6.486	0.0012	1456247_x_at		PLP2	proteolipid protein 2 (colonic epithelium-enriched)	Cytoplasm	transporter
0.205	12.304	0.00302	1455572_x_at	D	RPS18	ribosomal protein S18	Cytoplasm	other
0.204	11.44	0.00161	1427418_a_at		HIF1A	hypoxia inducible factor 1, alpha subunit (basic helix-loop-helix transcription factor)	Nucleus	transcription regulator
0.203	11.662	0.00212	1460671_at		GPX1	glutathione peroxidase 1	Cytoplasm	enzyme
0.203	6.942	0.00229	1447766_x_at		LIMD2	LIM domain containing 2	Other	other
0.203	10.002	0.00371	1416311_s_at		TUBA3E	tubulin, alpha 3e	Cytoplasm	other
0.202	9.882	0.00224	1416184_s_at		HMGA1	high mobility group AT-hook 1	Nucleus	transcription regulator
0.202	10.044	0.00103	1451132_at		PBXIP1	pre-B-cell leukemia homeobox interacting protein 1	Nucleus	transcription regulator
0.201	7.771	0.000658	1456528_x_at		NCL	nucleolin	Nucleus	other
0.2	7.086	0.00212	1452021_a_at		HES6	hes family bHLH transcription factor 6	Nucleus	transcription regulator
0.199	8.291	0.00255	1421859_at		ADAM17	ADAM metallopeptidase domain 17	Plasma Membrane	peptidase
0.199	10.64	0.00042	1447734_x_at		ALDOA	aldolase A, fructose-bisphosphate	Cytoplasm	enzyme
0.199	8.454	0.00267	1417271_a_at		ENG	endoglin	Plasma Membrane	transmembrane receptor
0.199	9.269	0.00105	1436124_at		PCYT1B	phosphate cytidylyltransferase 1, choline, beta	Cytoplasm	enzyme
0.198	9.268	0.0024	1449674_s_at	D	PDCD6IP	programmed cell death 6 interacting protein	Cytoplasm	other
0.197	8.897	0.00382	1435539_at		HTT	huntingtin	Cytoplasm	transcription regulator
0.196	11.838	0.00151	1418815_at		CDH2	cadherin 2, type 1, N-cadherin (neuronal)	Plasma Membrane	other	N-ac-CHAVC-NH2
0.196	9.289	0.00266	1426812_a_at		FAM129B	family with sequence similarity 129, member B	Cytoplasm	other
0.196	8.915	0.00109	1433567_at	D	GMPS	guanine monphosphate synthase	Nucleus	enzyme
0.194	8.297	0.00289	1417581_at		DHODH	dihydroorotate dehydrogenase (quinone)	Cytoplasm	enzyme	teriflunomide, leflunomide
0.194	6.227	0.00286	1422707_at		PIK3CG	phosphatidylinositol-4,5-bisphosphate 3-kinase, catalytic subunit gamma	Cytoplasm	kinase	SF 1126, PX-866, dactolisib, 2-(1H-indazol-4-yl)-6-(4-methanesulfonylpiperazin-1-ylmethyl)-4-morpholin-4-ylthieno(3,2-d)pyrimidine, buparlisib, XL147
0.194	9.629	0.00201	1456059_at		PSMD11	proteasome (prosome, macropain) 26S subunit, non-ATPase, 11	Cytoplasm	other
0.193	10.972	0.00119	1416408_at		ACOX1	acyl-CoA oxidase 1, palmitoyl	Cytoplasm	enzyme
0.193	13.132	0.00375	1419734_at		ACTB	actin, beta	Cytoplasm	other
0.193	8.093	0.00112	1443793_x_at		INTS1	integrator complex subunit 1	Nucleus	other
0.193	9.071	0.00272	1457726_at		RPS15A	ribosomal protein S15a	Cytoplasm	other
0.193	7.937	0.00299	1417446_at		SLC12A4	solute carrier family 12 (potassium/chloride transporter), member 4	Plasma Membrane	transporter	bumetanide
0.192	8.647	0.000451	1418372_at		ADSL	adenylosuccinate lyase	Cytoplasm	enzyme
0.192	9.147	0.00367	1424129_at		MFSD1	major facilitator superfamily domain containing 1	Other	transporter
0.192	11.57	0.00129	1433992_at		SHROOM2	shroom family member 2	Plasma Membrane	ion channel
0.189	9.931	0.00339	1437840_s_at		D2HGDH	D-2-hydroxyglutarate dehydrogenase	Cytoplasm	other
0.188	12.034	0.000684	1448732_at	D	CTSB	cathepsin B	Cytoplasm	peptidase
0.186	8.962	0.0015	1417691_at		BIN3	bridging integrator 3	Cytoplasm	other
0.186	11.093	0.00132	1419814_s_at		S100A1	S100 calcium binding protein A1	Cytoplasm	other
0.186	9.212	0.00298	1454646_at		TCP11L2	t-complex 11, testis-specific-like 2	Other	other
0.185	11.901	0.00235	1460708_s_at		Cdc42	cell division cycle 42	Plasma Membrane	enzyme
0.185	10.708	0.00145	1452713_a_at		SNRNP40	small nuclear ribonucleoprotein 40kDa (U5)	Nucleus	other
0.184	8.832	0.00314	1428534_at		NR2C2AP	nuclear receptor 2C2-associated protein	Nucleus	other
0.183	7.443	0.00373	1437982_x_at		COX15	cytochrome c oxidase assembly homolog 15 (yeast)	Cytoplasm	enzyme
0.182	9.876	0.00315	1422620_s_at		Ppap2a	phosphatidic acid phosphatase type 2A	Plasma Membrane	phosphatase
0.18	12.28	0.00336	1427260_a_at		TPM3	tropomyosin 3	Cytoplasm	other
0.179	10.706	0.00202	1424223_at		MTFP1	mitochondrial fission process 1	Cytoplasm	other
0.178	7.014	0.00343	1424556_at		PYCR1	pyrroline-5-carboxylate reductase 1	Cytoplasm	enzyme
0.173	10.696	0.00203	1435336_at		CELSR2	cadherin, EGF LAG seven-pass G-type receptor 2	Plasma Membrane	G-protein coupled receptor
0.172	10.45	0.00263	1428552_at		2610001J05Rik	RIKEN cDNA 2610001J05 gene	Other	other
0.172	10.758	0.00342	1424674_at		SLC39A6	solute carrier family 39 (zinc transporter), member 6	Plasma Membrane	transporter
0.169	9.912	0.00315	1435195_at		VASH1	vasohibin 1	Extracellular Space	other
0.168	11.212	0.00126	1448610_a_at		SOD2	superoxide dismutase 2, mitochondrial	Cytoplasm	enzyme
0.167	11.727	0.00378	1456205_x_at		TBCA	tubulin folding cofactor A	Other	other
0.165	10.642	0.00322	1423035_s_at		TXNDC17	thioredoxin domain containing 17	Cytoplasm	enzyme
0.163	8.858	0.00181	1454981_at		SZRD1	SUZ RNA binding domain containing 1	Other	other
0.162	10.874	0.00336	1416845_at		TMEM132A	transmembrane protein 132A	Cytoplasm	other
0.159	9.752	0.0034	1448249_at		GPD1	glycerol-3-phosphate dehydrogenase 1 (soluble)	Cytoplasm	enzyme
0.159	10.267	0.0023	1448963_at		NFYC	nuclear transcription factor Y, gamma	Nucleus	transcription regulator
0.151	8.908	0.00287	1416439_at		DCTPP1	dCTP pyrophosphatase 1	Cytoplasm	enzyme
0.151	13.368	0.00316	1431765_a_at		RPS2	ribosomal protein S2	Cytoplasm	other
0.147	12.042	0.00368	1435256_at		CLIP3	CAP-GLY domain containing linker protein 3	Plasma Membrane	other
0.145	14.024	0.00385	1415906_at		Tmsb4x (includes others)	thymosin, beta 4, X chromosome	Cytoplasm	other
0.139	9.792	0.00325	1452259_at		PHF20	PHD finger protein 20	Nucleus	other
-2.343	10.671	6.32e-06	1436387_at	D	HOMER1	homer homolog 1 (Drosophila)	Plasma Membrane	other
-1.751	7.399	1.24e-05	1459372_at		NPAS4	neuronal PAS domain protein 4	Nucleus	transcription regulator
-1.463	10.342	4.01e-05	1416505_at		NR4A1	nuclear receptor subfamily 4, group A, member 1	Nucleus	ligand-dependent nuclear receptor
-1.42	7.076	0.000259	1427683_at		EGR2	early growth response 2	Nucleus	transcription regulator
-1.335	9.402	7.83e-06	1457984_at		CRH	corticotropin releasing hormone	Extracellular Space	cytokine
-1.145	9.97	0.000235	1422168_a_at	D	BDNF	brain-derived neurotrophic factor	Extracellular Space	growth factor
-1.068	9.129	2.69e-07	1431724_a_at		P2RY12	purinergic receptor P2Y, G-protein coupled, 12	Plasma Membrane	G-protein coupled receptor	treprostinil, epoprostenol, prasugrel, ticagrelor, clopidogrel/telmisartan, ticlopidine, clopidogrel
-1.029	7.854	0.000313	1428923_at		PPP1R3G	protein phosphatase 1, regulatory subunit 3G	Cytoplasm	other
-0.994	11.874	1.09e-06	1436329_at		EGR3	early growth response 3	Nucleus	transcription regulator
-0.99	9.252	6.3e-07	1450468_at		MYOC	myocilin, trabecular meshwork inducible glucocorticoid response	Cytoplasm	other
-0.969	12.784	3.6e-05	1417065_at		EGR1	early growth response 1	Nucleus	transcription regulator
-0.876	7.462	1.63e-05	1457472_at	D	GIGYF2	GRB10 interacting GYF protein 2	Other	other
-0.841	11.814	8.18e-05	1436094_at		VGF	VGF nerve growth factor inducible	Extracellular Space	growth factor
-0.838	9.952	3.47e-05	1424633_at		CAMK1G	calcium/calmodulin-dependent protein kinase IG	Cytoplasm	kinase
-0.819	9.165	0.000403	1436994_a_at		HIST1H1C	histone cluster 1, H1c	Nucleus	other
-0.797	10.527	0.00029	1425281_a_at	D	TSC22D3	TSC22 domain family, member 3	Nucleus	transcription regulator
-0.796	9.699	0.000139	1422860_at		NTS	neurotensin	Extracellular Space	other
-0.791	7.892	0.000179	1419663_at	D	OGN	osteoglycin	Extracellular Space	growth factor
-0.758	8.476	0.00024	1451527_at		PCOLCE2	procollagen C-endopeptidase enhancer 2	Extracellular Space	other
-0.751	8.204	3.63e-05	1426081_a_at	D	DIO2	deiodinase, iodothyronine, type II	Cytoplasm	enzyme
-0.747	7.344	0.00148	1434458_at		FST	follistatin	Extracellular Space	other
-0.746	7.849	3.98e-06	1428642_at		SLC35D3	solute carrier family 35, member D3	Other	other
-0.73	8.828	0.000553	1456084_x_at	D	FMOD	fibromodulin	Extracellular Space	other
-0.718	9.477	0.000197	1433607_at		CBLN4	cerebellin 4 precursor	Extracellular Space	other
-0.676	9.701	7.15e-06	1449961_at	D	RPH3A	rabphilin 3A homolog (mouse)	Plasma Membrane	transporter
-0.673	8.403	6.1e-07	1451917_a_at	D	DCLK1	doublecortin-like kinase 1	Other	kinase
-0.662	10.859	6.17e-07	1456424_s_at	D	PLTP	phospholipid transfer protein	Extracellular Space	enzyme
-0.658	9.265	0.000555	1430649_at	D	BAALC	brain and acute leukemia, cytoplasmic	Cytoplasm	other
-0.655	7.749	0.00326	1422155_at		HIST1H3G	histone cluster 1, H3g	Nucleus	other
-0.652	8.365	1.52e-05	1458539_at	D	R3HDM1	R3H domain containing 1	Other	other
-0.643	8.423	4.84e-06	1450082_s_at	D	ETV5	ets variant 5	Nucleus	transcription regulator
-0.642	8.01	0.000281	1453334_at		B230216N24Rik	RIKEN cDNA B230216N24 gene	Other	other
-0.624	10.067	1.92e-05	1426147_s_at		CLDN10	claudin 10	Plasma Membrane	other
-0.618	9.057	0.000344	1427371_at		Abca8a	ATP-binding cassette, sub-family A (ABC1), member 8a	Other	transporter
-0.617	10.375	3.9e-06	1451411_at	D	GPRC5B	G protein-coupled receptor, class C, group 5, member B	Plasma Membrane	G-protein coupled receptor
-0.607	9.902	4.49e-06	1424992_at	D	TPRKB	TP53RK binding protein	Cytoplasm	other
-0.602	6.788	0.000777	1436098_at		BCHE	butyrylcholinesterase	Plasma Membrane	enzyme	dipivefrin, malathion, atropine/edrophonium, echothiophate, tacrine, edrophonium, isoflurophate, pyridostigmine, pralidoxime, rivastigmine
-0.599	9.11	0.00143	1448860_at		REM2	RAS (RAD and GEM)-like GTP binding 2	Plasma Membrane	enzyme
-0.591	8.637	0.00177	1427246_at	D	MAGI1	membrane associated guanylate kinase, WW and PDZ domain containing 1	Plasma Membrane	kinase
-0.586	7.054	7.49e-05	1418407_at	D	PDE8A	phosphodiesterase 8A	Cytoplasm	enzyme	dyphylline, nitroglycerin, aminophylline, anagrelide, milrinone, dipyridamole, ketotifen, tolbutamide, theophylline, pentoxifylline
-0.585	6.318	0.00191	1431406_at		ETNPPL	ethanolamine-phosphate phospho-lyase	Other	enzyme
-0.578	9.164	3.98e-05	1440901_at	D	DGKB	diacylglycerol kinase, beta 90kDa	Cytoplasm	kinase
-0.578	8.966	3.95e-06	1417143_at	D	LPAR1	lysophosphatidic acid receptor 1	Plasma Membrane	G-protein coupled receptor
-0.573	8.914	9.59e-06	1451382_at		CHAC1	ChaC, cation transport regulator homolog 1 (E. coli)	Cytoplasm	other
-0.572	6.943	0.00231	1456532_at		PDGFD	platelet derived growth factor D	Extracellular Space	growth factor
-0.57	8.994	0.000101	1418950_at		DRD2	dopamine receptor D2	Plasma Membrane	G-protein coupled receptor	paliperidone, risperidone, buspirone, carbidopa/entacapone/levodopa, bifeprunox, iloperidone, blonanserin, asenapine, pardoprunox, ocaperidone, abaperidone, methotrimeprazine, fluspirilene, SLV-314, cariprazine, rotigotine, acetophenazine, sultopride, zuclopenthixol, thioproperazine, lurasidone, opipramol, paliperidone palmitate, pipothiazine, carbidopa/levodopa, chloropromazine, domperidone, met…
-0.567	7.64	0.00012	1450759_at		BMP6	bone morphogenetic protein 6	Extracellular Space	growth factor
-0.552	7.411	0.000425	1441778_at	D	ADCYAP1	adenylate cyclase activating polypeptide 1 (pituitary)	Extracellular Space	other
-0.552	8.86	9.27e-05	1425111_at	D	SORCS3	sortilin-related VPS10 domain containing receptor 3	Nucleus	transporter
-0.546	7.915	0.000755	1418533_s_at	D	FZD2	frizzled class receptor 2	Plasma Membrane	G-protein coupled receptor
-0.538	10.324	3.81e-07	1430600_at	D	CMTM5	CKLF-like MARVEL transmembrane domain containing 5	Other	cytokine
-0.538	7.985	2.78e-05	1455663_at		OLFML1	olfactomedin-like 1	Extracellular Space	other
-0.536	8.731	0.000108	1452338_s_at	D	ITSN1	intersectin 1 (SH3 domain protein)	Cytoplasm	other
-0.532	9.18	4.46e-05	1430038_at	D	GPHN	gephyrin	Plasma Membrane	enzyme
-0.531	6.67	0.000672	1425408_a_at		2610034M16Rik	RIKEN cDNA 2610034M16 gene	Other	other
-0.531	8.092	0.0014	1416318_at		SERPINB1	serpin peptidase inhibitor, clade B (ovalbumin), member 1	Cytoplasm	other
-0.528	8.959	3.36e-05	1425608_at	D	DUSP3	dual specificity phosphatase 3	Cytoplasm	phosphatase
-0.526	10.543	0.000517	1416455_a_at		CRYAB	crystallin, alpha B	Nucleus	other
-0.526	9.007	6.02e-05	1435521_at	D	MSI2	musashi RNA-binding protein 2	Cytoplasm	other
-0.525	7.667	1.96e-05	1435463_s_at		MYO1D	myosin ID	Plasma Membrane	other
-0.525	7.661	0.00021	1428345_at	D	PPAPDC2	phosphatidic acid phosphatase type 2 domain containing 2	Other	phosphatase
-0.516	6.867	0.00151	1457570_at		A230001M10Rik	RIKEN cDNA A230001M10 gene	Other	other
-0.516	8.95	0.000327	1428484_at		OSBPL3	oxysterol binding protein-like 3	Cytoplasm	other
-0.515	8.052	0.000129	1435852_at		SPRED3	sprouty-related, EVH1 domain containing 3	Extracellular Space	cytokine
-0.506	8.015	5.58e-05	1427685_a_at	D	SYNJ2	synaptojanin 2	Cytoplasm	phosphatase
-0.502	7.323	0.0024	1459269_at		SDR39U1	short chain dehydrogenase/reductase family 39U, member 1	Nucleus	other
-0.501	11.036	0.000616	1452540_a_at		HIST1H2BO	histone cluster 1, H2bo	Nucleus	other
-0.501	8.51	3.79e-05	1433938_at	D	TP53BP2	tumor protein p53 binding protein, 2	Nucleus	other
-0.5	11.55	3.69e-07	1455080_at		PPP1R16B	protein phosphatase 1, regulatory subunit 16B	Plasma Membrane	phosphatase
-0.499	7.955	0.000142	1456640_at		SH3RF2	SH3 domain containing ring finger 2	Extracellular Space	other
-0.497	9.507	0.000306	1420954_a_at		ADD1	adducin 1 (alpha)	Cytoplasm	other
-0.497	8.469	3.39e-05	1457323_at		SMCO3	single-pass membrane protein with coiled-coil domains 3	Other	other
-0.497	6.239	0.000502	1432130_a_at		TTC14	tetratricopeptide repeat domain 14	Other	other
-0.495	9.422	0.000527	1456838_at		LINGO3	leucine rich repeat and Ig domain containing 3	Other	other
-0.494	7.309	0.00116	1437950_at	D	FAM149A	family with sequence similarity 149, member A	Other	other
-0.493	11.209	2.12e-05	1423222_at	D	CAP2	CAP, adenylate cyclase-associated protein, 2 (yeast)	Plasma Membrane	other
-0.492	7.57	0.00298	1418739_at		SGK2	serum/glucocorticoid regulated kinase 2	Cytoplasm	kinase
-0.491	8.27	0.00225	1447854_s_at	D	HIST1H2BJ	histone cluster 1, H2bj	Nucleus	other
-0.491	7.913	0.00166	1420437_at		IDO1	indoleamine 2,3-dioxygenase 1	Cytoplasm	enzyme
-0.49	7.77	0.000398	1456901_at		ADAMTS20	ADAM metallopeptidase with thrombospondin type 1 motif, 20	Extracellular Space	peptidase
-0.486	9.327	7.86e-06	1455717_s_at		DAAM2	dishevelled associated activator of morphogenesis 2	Other	other
-0.485	7.702	0.000537	1436669_at	D	1700019G17Rik	RIKEN cDNA 1700019G17 gene	Other	other
-0.485	7.741	3.47e-06	1429783_at		PDLIM5	PDZ and LIM domain 5	Cytoplasm	other
-0.485	8.33	1.56e-05	1422705_at	D	PMEPA1	prostate transmembrane protein, androgen induced 1	Plasma Membrane	other
-0.483	7.394	0.00104	1422542_at		GPR34	G protein-coupled receptor 34	Plasma Membrane	other
-0.482	6.204	8.72e-06	1445642_at		Lemd1	LEM domain containing 1	Other	other
-0.481	6.548	0.000358	1450906_at	D	PLXNC1	plexin C1	Plasma Membrane	transmembrane receptor
-0.477	9.354	1.18e-05	1428387_at	D	ACSL3	acyl-CoA synthetase long-chain family member 3	Cytoplasm	enzyme
-0.477	8.586	6.09e-05	1459894_at	D	IQGAP2	IQ motif containing GTPase activating protein 2	Cytoplasm	other
-0.477	10.814	0.000166	1449335_at	D	TIMP3	TIMP metallopeptidase inhibitor 3	Extracellular Space	other
-0.476	9.034	3.36e-05	1434510_at		PAPSS2	3'-phosphoadenosine 5'-phosphosulfate synthase 2	Cytoplasm	enzyme
-0.476	9.855	3.01e-06	1444089_at	D	SPTBN1	spectrin, beta, non-erythrocytic 1	Plasma Membrane	other
-0.474	7.473	0.000124	1422042_at		GJC3	gap junction protein, gamma 3, 30.2kDa	Extracellular Space	transporter
-0.473	7.588	0.00157	1423523_at		AASS	aminoadipate-semialdehyde synthase	Cytoplasm	enzyme
-0.473	7.15	0.000195	1438937_x_at	D	ANG	angiogenin, ribonuclease, RNase A family, 5	Extracellular Space	enzyme
-0.472	8.968	0.00377	1427484_at	D	EML5	echinoderm microtubule associated protein like 5	Cytoplasm	other
-0.472	8.309	0.0002	1431042_at	D	PAQR8	progestin and adipoQ receptor family member VIII	Plasma Membrane	other
-0.472	9.729	2.15e-05	1447807_s_at	D	PLEKHH1	pleckstrin homology domain containing, family H (with MyTH4 domain) member 1	Cytoplasm	other
-0.472	9.032	0.000579	1419606_a_at		TNNT1	troponin T type 1 (skeletal, slow)	Cytoplasm	other
-0.471	8.932	0.000211	1417629_at		LOC102724788/PRODH	proline dehydrogenase (oxidase) 1	Cytoplasm	enzyme
-0.469	9.42	9.04e-05	1428170_at		ZNF180	zinc finger protein 180	Nucleus	transcription regulator
-0.468	8.662	0.00105	1431394_a_at		LRRK2	leucine-rich repeat kinase 2	Cytoplasm	kinase
-0.467	8.322	0.000192	1421926_at		MAPK11	mitogen-activated protein kinase 11	Cytoplasm	kinase	talmapimod, regorafenib
-0.467	9.402	0.000944	1454906_at		RARB	retinoic acid receptor, beta	Nucleus	ligand-dependent nuclear receptor	etretinate, daunorubicin/tretinoin, idarubicin/tretinoin, doxorubicin/tretinoin, adapalene, isotretinoin, tazarotene, acitretin, tretinoin, tamibarotene, alitretinoin, fenretinide
-0.465	8.889	0.00223	1436045_at		TSGA10	testis specific, 10	Cytoplasm	other
-0.465	7.598	1.32e-05	1457704_at	D	ZNF385B	zinc finger protein 385B	Nucleus	other
-0.464	8.118	4.51e-05	1420938_at	D	HS6ST2	heparan sulfate 6-O-sulfotransferase 2	Plasma Membrane	enzyme
-0.463	7.203	0.000169	1416805_at		FAM198B	family with sequence similarity 198, member B	Cytoplasm	other
-0.462	11.379	0.000315	1418072_at		HIST1H2BI	histone cluster 1, H2bi	Other	other
-0.461	8.338	0.000208	1425573_a_at	D	ASAP1	ArfGAP with SH3 domain, ankyrin repeat and PH domain 1	Plasma Membrane	other
-0.461	11.43	1.32e-05	1450928_at	D	ID4	inhibitor of DNA binding 4, dominant negative helix-loop-helix protein	Nucleus	transcription regulator
-0.458	10.208	7.03e-05	1436216_s_at	D	INF2	inverted formin, FH2 and WH2 domain containing	Cytoplasm	other
-0.458	9.123	3.32e-05	1448927_at		Kcnn2	potassium intermediate/small conductance calcium-activated channel, subfamily N, member 2	Plasma Membrane	ion channel
-0.457	8.4	0.000123	1424007_at		GDF10	growth differentiation factor 10	Extracellular Space	growth factor
-0.457	12.138	7.54e-05	1427038_at		PENK	proenkephalin	Extracellular Space	other
-0.456	8.495	0.00304	1438344_at	D	LPPR5	lipid phosphate phosphatase-related protein type 5	Other	other
-0.456	8.174	0.000796	1426575_at	D	SGMS1	sphingomyelin synthase 1	Cytoplasm	enzyme
-0.454	8.399	0.0015	1451751_at		DDIT4L	DNA-damage-inducible transcript 4-like	Other	other
-0.454	11.76	0.000136	1416783_at		TAC1	tachykinin, precursor 1	Extracellular Space	other
-0.453	10.372	7.51e-06	1435066_at	D	Pitpnc1	phosphatidylinositol transfer protein, cytoplasmic 1	Cytoplasm	transporter
-0.452	6.907	0.00157	1440397_at		CACNA2D1	calcium channel, voltage-dependent, alpha 2/delta subunit 1	Plasma Membrane	ion channel	amlodipine/hydrochlorothiazide/valsartan, amlodipine/telmisartan, aliskiren/amlodipine, amlodipine/hydrochlorothiazide/olmesartan medoxomil, aliskiren/amlodipine/hydrochlorothiazide, nilvadipine, amlodipine/valsartan, amlodipine/benazepril, gabapentin, bepridil, enalapril/felodipine, amlodipine/atorvastatin, nisoldipine, isradipine, felodipine, nitrendipine, amlodipine, nicardipine, nifedipine, p…
-0.452	10.302	2.65e-05	1424475_at	D	CAMKK2	calcium/calmodulin-dependent protein kinase kinase 2, beta	Cytoplasm	kinase
-0.452	9.262	5.35e-05	1417804_at	D	RASGRP2	RAS guanyl releasing protein 2 (calcium and DAG-regulated)	Cytoplasm	other
-0.451	8.439	1.34e-05	1424734_at	D	RASGRF1	Ras protein-specific guanine nucleotide-releasing factor 1	Cytoplasm	other
-0.45	9.587	0.000143	1422742_at		HIVEP1	human immunodeficiency virus type I enhancer binding protein 1	Nucleus	transcription regulator
-0.449	12.525	3.52e-06	1428393_at		NRN1	neuritin 1	Cytoplasm	other
-0.449	9.889	0.000503	1419389_at	D	PDE10A	phosphodiesterase 10A	Cytoplasm	enzyme	aspirin/dipyridamole/telmisartan, triflusal, dipyridamole, aspirin/dipyridamole
-0.448	11.323	1.09e-06	1426235_a_at		GLUL	glutamate-ammonia ligase	Cytoplasm	enzyme
-0.448	11.903	6.29e-05	1430700_a_at		PLA2G7	phospholipase A2, group VII (platelet-activating factor acetylhydrolase, plasma)	Extracellular Space	enzyme	darapladib
-0.448	12.876	0.000605	1425467_a_at	D	PLP1	proteolipid protein 1	Plasma Membrane	other
-0.447	8.361	3.88e-05	1451819_at	D	ZSWIM6	zinc finger, SWIM-type containing 6	Other	other
-0.446	9.561	1.36e-05	1425576_at	D	AHCYL1	adenosylhomocysteinase-like 1	Cytoplasm	enzyme
-0.446	9.621	0.000383	1447979_at	D	SGSM1	small G protein signaling modulator 1	Nucleus	other
-0.445	8.898	6.01e-05	1426622_a_at		QPCT	glutaminyl-peptide cyclotransferase	Cytoplasm	enzyme
-0.441	9.538	2.24e-05	1424393_s_at	D	ADHFE1	alcohol dehydrogenase, iron containing, 1	Cytoplasm	enzyme
-0.44	10.419	6.29e-05	1460038_at		Pou3f1	POU domain, class 3, transcription factor 1	Nucleus	transcription regulator
-0.437	9.772	5.58e-05	1444058_at	D	DZIP3	DAZ interacting zinc finger protein 3	Cytoplasm	enzyme
-0.436	7.035	3.87e-06	1421353_at		PDE7B	phosphodiesterase 7B	Cytoplasm	enzyme	dyphylline, nitroglycerin, aminophylline, anagrelide, milrinone, dipyridamole, ketotifen, tolbutamide, theophylline, pentoxifylline
-0.435	8.128	0.000291	1450945_at	D	PRKCA	protein kinase C, alpha	Cytoplasm	kinase	L-threo-safingol, ingenol mebutate
-0.434	7.995	0.00106	1418424_at		TNFAIP6	tumor necrosis factor, alpha-induced protein 6	Extracellular Space	other
-0.433	8.642	0.000189	1420580_at		4930429B21Rik	RIKEN cDNA 4930429B21 gene	Other	other
-0.433	6.514	0.000916	1440339_at		ENPP1	ectonucleotide pyrophosphatase/phosphodiesterase 1	Plasma Membrane	enzyme
-0.433	8.419	0.00358	1424671_at		PLEKHF1	pleckstrin homology domain containing, family F (with FYVE domain) member 1	Cytoplasm	other
-0.432	9.917	2.73e-05	1442226_at	D	SEMA3E	sema domain, immunoglobulin domain (Ig), short basic domain, secreted, (semaphorin) 3E	Extracellular Space	other
-0.431	9.857	0.00113	1417623_at	D	SLC12A2	solute carrier family 12 (sodium/potassium/chloride transporter), member 2	Plasma Membrane	transporter	bumetanide, quinethazone
-0.429	10.816	0.000173	1449007_at		BTG3	BTG family, member 3	Nucleus	other
-0.429	9.498	0.000844	1429537_at	D	PNISR	PNN-interacting serine/arginine-rich protein	Nucleus	other
-0.429	9.034	1.08e-05	1435941_at	D	RHBDL3	rhomboid, veinlet-like 3 (Drosophila)	Plasma Membrane	peptidase
-0.429	10.922	0.000443	1428664_at		VIP	vasoactive intestinal peptide	Extracellular Space	other
-0.427	8.349	0.00155	1432269_a_at		SH3KBP1	SH3-domain kinase binding protein 1	Cytoplasm	other
-0.427	10.714	8.07e-05	1418744_s_at	D	TESC	tescalcin	Cytoplasm	other
-0.426	7.709	0.000674	1418322_at	D	CREM	cAMP responsive element modulator	Nucleus	transcription regulator
-0.426	9.04	7.01e-05	1418086_at		PPP1R14A	protein phosphatase 1, regulatory (inhibitor) subunit 14A	Cytoplasm	phosphatase
-0.425	8.948	0.00115	1424677_at		Cyp2j9	cytochrome P450, family 2, subfamily j, polypeptide 9	Other	enzyme
-0.424	6.217	0.00232	1430996_at	D	ETNK1	ethanolamine kinase 1	Cytoplasm	kinase
-0.422	7.525	0.0039	1442223_at		ENAH	enabled homolog (Drosophila)	Plasma Membrane	other
-0.422	8.201	7.06e-05	1429741_at	D	KCNV1	potassium channel, subfamily V, member 1	Plasma Membrane	ion channel
-0.417	9.825	0.000816	1434055_at		GALNT9	polypeptide N-acetylgalactosaminyltransferase 9	Cytoplasm	enzyme
-0.416	6.861	0.000605	1437122_at	D	BCL2	B-cell CLL/lymphoma 2	Cytoplasm	transporter	oblimersen, rasagiline, (-)-gossypol, gemcitabine/paclitaxel, bortezomib/paclitaxel, paclitaxel/trastuzumab, paclitaxel/pertuzumab/trastuzumab, lapatinib/paclitaxel, doxorubicin/paclitaxel, epirubicin/paclitaxel, paclitaxel
-0.416	7.724	0.00333	1419288_at	D	JAM2	junctional adhesion molecule 2	Plasma Membrane	other
-0.414	10.282	3.67e-05	1435367_at		MAPK4	mitogen-activated protein kinase 4	Cytoplasm	kinase
-0.414	10.086	0.00157	1435553_at		PDZD2	PDZ domain containing 2	Plasma Membrane	other
-0.414	12.697	0.000169	1450708_at		SCG2	secretogranin II	Extracellular Space	cytokine
-0.413	8.662	0.000154	1422643_at		MOXD1	monooxygenase, DBH-like 1	Cytoplasm	enzyme
-0.413	7.198	0.000524	1443860_at		Ptprd	protein tyrosine phosphatase, receptor type, D	Plasma Membrane	phosphatase
-0.411	8.689	0.00202	1431057_a_at		PRSS23	protease, serine, 23	Extracellular Space	peptidase
-0.41	6.894	0.000916	1443746_x_at	D	DMP1	dentin matrix acidic phosphoprotein 1	Extracellular Space	other
-0.409	8.173	0.0013	1458163_at		Zfp941	zinc finger protein 941	Other	other
-0.408	10.166	4.45e-05	1443960_at	D	ASRGL1	asparaginase like 1	Cytoplasm	enzyme
-0.408	8.783	0.000451	1418715_at	D	PANK1	pantothenate kinase 1	Cytoplasm	kinase
-0.408	9.976	2.02e-05	1420950_at		ZNRF1	zinc and ring finger 1, E3 ubiquitin protein ligase	Cytoplasm	enzyme
-0.407	7.658	0.000203	1447404_at		C18orf25	chromosome 18 open reading frame 25	Other	other
-0.407	7.479	0.000139	1418976_s_at		CIDEB	cell death-inducing DFFA-like effector b	Cytoplasm	other
-0.407	7.272	5.87e-05	1457009_at	D	RHOBTB3	Rho-related BTB domain containing 3	Cytoplasm	enzyme
-0.406	9.128	2.19e-05	1452980_at		2810468N07Rik	RIKEN cDNA 2810468N07 gene	Other	other
-0.406	6.792	0.00159	1455277_at		HHIP	hedgehog interacting protein	Plasma Membrane	other
-0.406	7.88	0.00089	1435950_at		HR	hair growth associated	Nucleus	transcription regulator
-0.406	9.235	0.000192	1436444_at		SERTM1	serine-rich and transmembrane domain containing 1	Other	other
-0.405	9.593	0.000272	1438756_at		ANKRD29	ankyrin repeat domain 29	Other	other
-0.405	7.081	0.000691	1450530_at		B3GALT1	UDP-Gal:betaGlcNAc beta 1,3-galactosyltransferase, polypeptide 1	Cytoplasm	enzyme
-0.405	7.868	7.37e-05	1421342_at	D	KCNS2	potassium voltage-gated channel, delayed-rectifier, subfamily S, member 2	Plasma Membrane	ion channel
-0.404	8.742	0.000228	1421328_at		MAP2	microtubule-associated protein 2	Plasma Membrane	other	estramustine
-0.403	8.689	3.18e-05	1459197_at		CNTN1	contactin 1	Plasma Membrane	enzyme
-0.403	8.002	0.00118	1439096_at		DDO	D-aspartate oxidase	Cytoplasm	enzyme
-0.403	9.508	5.61e-05	1454784_at	D	HS3ST2	heparan sulfate (glucosamine) 3-O-sulfotransferase 2	Cytoplasm	enzyme
-0.403	11.274	4.26e-05	1435305_at	D	NTRK2	neurotrophic tyrosine kinase, receptor, type 2	Plasma Membrane	kinase	cabozantinib, cabozantinib/erlotinib
-0.403	9.1	0.000212	1423946_at		PDLIM2	PDZ and LIM domain 2 (mystique)	Cytoplasm	other
-0.403	11.357	0.000266	1455225_at		SYNE1	spectrin repeat containing, nuclear envelope 1	Nucleus	other
-0.402	7.978	0.00339	1424652_at		EVA1A	eva-1 homolog A (C. elegans)	Plasma Membrane	other
-0.402	7.683	0.00134	1418808_at		RDH5	retinol dehydrogenase 5 (11-cis/9-cis)	Cytoplasm	enzyme
-0.402	7.71	0.000611	1451046_at		ZFPM1	zinc finger protein, FOG family member 1	Nucleus	transcription regulator
-0.401	9.334	1.64e-05	1429841_at		MEGF10	multiple EGF-like-domains 10	Plasma Membrane	other
-0.399	8.033	0.00068	1452277_at		ARSG	arylsulfatase G	Cytoplasm	enzyme
-0.399	10.035	4.72e-06	1416718_at	D	BCAN	brevican	Extracellular Space	other
-0.399	8.92	0.000653	1426152_a_at		KITLG	KIT ligand	Extracellular Space	growth factor
-0.399	9.822	0.000155	1433825_at	D	NTRK3	neurotrophic tyrosine kinase, receptor, type 3	Plasma Membrane	kinase
-0.399	10.633	0.000805	1439633_at		SYT7	synaptotagmin VII	Cytoplasm	transporter
-0.398	8.283	0.000319	1434477_at	D	HECA	headcase homolog (Drosophila)	Other	other
-0.398	8.469	0.000791	1458342_at		SYNDIG1L	synapse differentiation inducing 1-like	Cytoplasm	other
-0.396	10.372	0.000244	1432432_a_at	D	RAB3C	RAB3C, member RAS oncogene family	Cytoplasm	enzyme
-0.396	8.925	0.000143	1426368_at		RIN2	Ras and Rab interactor 2	Cytoplasm	other
-0.396	10.588	0.00101	1423571_at		S1PR1	sphingosine-1-phosphate receptor 1	Plasma Membrane	G-protein coupled receptor	fingolimod
-0.395	7.611	2.31e-05	1424813_at	D	FAM149B1	family with sequence similarity 149, member B1	Other	other
-0.395	8.963	0.00146	1416049_at		GLDC	glycine dehydrogenase (decarboxylating)	Cytoplasm	enzyme
-0.394	11.088	9.03e-05	1427144_at	D	HNRNPLL	heterogeneous nuclear ribonucleoprotein L-like	Other	other
-0.393	9.525	4.49e-06	1439300_at	D	CHIC1	cysteine-rich hydrophobic domain 1	Plasma Membrane	other
-0.393	9.27	0.00189	1418104_at		NRIP3	nuclear receptor interacting protein 3	Other	other
-0.393	9.263	0.000105	1425339_at	D	PLCB4	phospholipase C, beta 4	Cytoplasm	enzyme
-0.393	8.275	0.00235	1416321_s_at		PRELP	proline/arginine-rich end leucine-rich repeat protein	Extracellular Space	other
-0.392	7.792	0.000165	1417590_at		CYP27A1	cytochrome P450, family 27, subfamily A, polypeptide 1	Cytoplasm	enzyme
-0.392	7.599	0.00303	1435680_a_at		DPP7	dipeptidyl-peptidase 7	Cytoplasm	peptidase
-0.392	8.078	0.000831	1427284_a_at		TTPA	tocopherol (alpha) transfer protein	Cytoplasm	transporter
-0.391	7.741	0.000588	1417345_at	D	EMC7	ER membrane protein complex subunit 7	Other	other
-0.391	9.713	0.00156	1454867_at		MN1	meningioma (disrupted in balanced translocation) 1	Nucleus	other
-0.39	7.533	0.000677	1422153_a_at		ASB11	ankyrin repeat and SOCS box containing 11, E3 ubiquitin protein ligase	Nucleus	transcription regulator
-0.388	10.98	0.000233	1423194_at	D	ARHGAP5	Rho GTPase activating protein 5	Cytoplasm	enzyme
-0.388	9.528	9.73e-05	1455188_at		EPHB1	EPH receptor B1	Plasma Membrane	kinase
-0.388	5.208	0.00178	1448024_at		NPR3	natriuretic peptide receptor 3	Plasma Membrane	G-protein coupled receptor	nesiritide
-0.388	8.335	0.000195	1425892_a_at		PNOC	prepronociceptin	Extracellular Space	other
-0.387	7.934	0.000627	1438132_at		Gm5089	predicted gene 5089	Other	other
-0.386	8.349	5.07e-05	1427735_a_at		ACTA1	actin, alpha 1, skeletal muscle	Cytoplasm	other
-0.386	10.699	0.000232	1435666_at		MAST3	microtubule associated serine/threonine kinase 3	Other	kinase
-0.386	9.576	0.000795	1448768_at		MOG	myelin oligodendrocyte glycoprotein	Extracellular Space	other
-0.386	7.915	0.00195	1455216_at		PAQR6	progestin and adipoQ receptor family member VI	Plasma Membrane	other
-0.385	8.655	0.000156	1417577_at		TRPC3	transient receptor potential cation channel, subfamily C, member 3	Plasma Membrane	ion channel
-0.385	9.394	0.00016	1435703_at	D	UBASH3B	ubiquitin associated and SH3 domain containing B	Other	enzyme
-0.384	9.281	8.2e-05	1434500_at		TTYH2	tweety family member 2	Other	ion channel
-0.383	8.725	1.99e-05	1419280_at	D	PIP4K2A	phosphatidylinositol-5-phosphate 4-kinase, type II, alpha	Cytoplasm	kinase
-0.383	11.641	3.88e-05	1416287_at	D	RGS4	regulator of G-protein signaling 4	Cytoplasm	other
-0.383	9.327	0.0031	1438042_at		SHOX2	short stature homeobox 2	Nucleus	transcription regulator
-0.383	7.411	0.00247	1438773_at	D	STEAP2	STEAP family member 2, metalloreductase	Plasma Membrane	transporter
-0.382	10.836	0.000768	1418980_a_at	D	CNP	2',3'-cyclic nucleotide 3' phosphodiesterase	Cytoplasm	enzyme
-0.382	8.95	2.51e-05	1426802_at		SEPT8	septin 8	Extracellular Space	other
-0.38	6.115	0.000154	1445854_at		C230004F18Rik	RIKEN cDNA C230004F18 gene	Other	other
-0.379	9.779	7.81e-06	1419077_at		MPP3	membrane protein, palmitoylated 3 (MAGUK p55 subfamily member 3)	Plasma Membrane	kinase
-0.379	8.403	0.000371	1460587_at		Sox2ot	SOX2 overlapping transcript (non-protein coding)	Other	other
-0.378	8.88	0.000387	1438309_at	D	ACVR1C	activin A receptor, type IC	Plasma Membrane	kinase
-0.377	6.969	0.00351	1439555_at		RLF	rearranged L-myc fusion	Nucleus	transcription regulator
-0.377	7.896	7.09e-05	1417455_at		TGFB3	transforming growth factor, beta 3	Extracellular Space	growth factor
-0.376	10.665	5.76e-05	1436611_at		SLC39A12	solute carrier family 39 (zinc transporter), member 12	Plasma Membrane	transporter
-0.375	7.943	0.00368	1431024_a_at	D	ARID4B	AT rich interactive domain 4B (RBP1-like)	Nucleus	other
-0.375	10.046	0.000376	1457092_at		FAM19A1	family with sequence similarity 19 (chemokine (C-C motif)-like), member A1	Extracellular Space	other
-0.375	8.329	0.00038	1421340_at	D	MAP3K5	mitogen-activated protein kinase kinase kinase 5	Cytoplasm	kinase
-0.375	9.336	8.58e-05	1449127_at		SELPLG	selectin P ligand	Plasma Membrane	other
-0.374	9.795	0.00138	1443824_s_at		CA7	carbonic anhydrase VII	Cytoplasm	enzyme	ethoxyzolamide, dichlorphenamide, methazolamide, hydrochlorothiazide, acetazolamide, trichloromethiazide, chlorothiazide, chlorthalidone, benzthiazide, sulfacetamide, topiramate
-0.374	7.978	0.000497	1457829_at		CLGN	calmegin	Cytoplasm	peptidase
-0.374	9.653	0.000159	1454043_a_at	D	KCNAB1	potassium voltage-gated channel, shaker-related subfamily, beta member 1	Plasma Membrane	ion channel
-0.374	11.137	0.00198	1435678_at		Pou3f3os	POU domain, class 3, transcription factor 3, opposite strand	Other	other
-0.373	8.785	0.000279	1422878_at		SYT12	synaptotagmin XII	Plasma Membrane	transporter
-0.372	10.77	0.000353	1452727_at		R3HDM2	R3H domain containing 2	Nucleus	other
-0.372	10.086	0.000505	1418691_at		RGS9	regulator of G-protein signaling 9	Cytoplasm	enzyme
-0.371	8.563	4.52e-05	1435245_at		GLS2	glutaminase 2 (liver, mitochondrial)	Cytoplasm	enzyme
-0.371	11.585	0.000509	1432558_a_at	D	MAL	mal, T-cell differentiation protein	Plasma Membrane	transporter
-0.371	9.592	0.000204	1456783_at		ZDBF2	zinc finger, DBF-type containing 2	Other	other
-0.37	10.772	1.64e-05	1433939_at		AFF3	AF4/FMR2 family, member 3	Nucleus	transcription regulator
-0.37	10.213	4.89e-06	1440210_at	D	CACNG2	calcium channel, voltage-dependent, gamma subunit 2	Plasma Membrane	ion channel
-0.37	7.76	0.000523	1422871_at		KCNJ12	potassium inwardly-rectifying channel, subfamily J, member 12	Plasma Membrane	ion channel	nicorandil, amiodarone, dofetilide
-0.369	9.71	0.000155	1425510_at	D	MARK1	MAP/microtubule affinity-regulating kinase 1	Cytoplasm	kinase
-0.369	8.059	0.00249	1439154_at		NUP98	nucleoporin 98kDa	Nucleus	transporter
-0.369	11.382	0.000205	1438619_x_at	D	ZDHHC14	zinc finger, DHHC-type containing 14	Cytoplasm	enzyme
-0.368	7.384	0.000132	1453589_a_at	D	2610005L07Rik	cadherin 11 pseudogene	Other	other
-0.368	8.614	3.32e-05	1424408_at		LIMS2	LIM and senescent cell antigen-like domains 2	Cytoplasm	other
-0.367	8.394	0.00288	1419223_a_at	D	DTNA	dystrobrevin, alpha	Plasma Membrane	other
-0.366	6.478	0.00162	1431381_at		3110005L24Rik	RIKEN cDNA 3110005L24 gene	Other	other
-0.366	8.556	0.00163	1428485_at		CA12	carbonic anhydrase XII	Plasma Membrane	enzyme	methazolamide, hydrochlorothiazide, acetazolamide, trichloromethiazide, chlorothiazide, chlorthalidone, benzthiazide, sulfacetamide, topiramate
-0.366	8.247	0.000493	1460390_at	D	SORL1	sortilin-related receptor, L(DLR class) A repeats containing	Cytoplasm	transporter
-0.366	7.529	0.00304	1437236_a_at	D	ZNF274	zinc finger protein 274	Nucleus	transcription regulator
-0.364	5.506	0.00208	1426295_at		HAPLN1	hyaluronan and proteoglycan link protein 1	Extracellular Space	other
-0.364	8.913	0.000412	1435438_at		SOX8	SRY (sex determining region Y)-box 8	Nucleus	transcription regulator
-0.362	8.312	0.000465	1421100_a_at	D	DAB1	Dab, reelin signal transducer, homolog 1 (Drosophila)	Cytoplasm	other
-0.362	11.763	0.00218	1428118_at	D	LINGO1	leucine rich repeat and Ig domain containing 1	Plasma Membrane	other
-0.361	9.83	0.000652	1429055_at		KIAA1598	KIAA1598	Plasma Membrane	other
-0.36	9.838	0.000234	1436299_at		GLS	glutaminase	Cytoplasm	enzyme
-0.359	7.196	8.24e-05	1456503_at		NUP214	nucleoporin 214kDa	Nucleus	transporter
-0.359	7.574	0.000421	1436764_at	D	PARD3	par-3 family cell polarity regulator	Plasma Membrane	other
-0.359	10.797	2.75e-05	1437621_x_at	D	PHGDH	phosphoglycerate dehydrogenase	Cytoplasm	enzyme
-0.358	8.795	2.82e-05	1448251_at	D	CLMP	CXADR-like membrane protein	Plasma Membrane	other
-0.358	9.95	0.00133	1428739_at	D	ENHO	energy homeostasis associated	Other	other
-0.358	9.499	1.91e-05	1455392_at	D	PRR18	proline rich 18	Other	other
-0.357	11.013	2.97e-05	1426871_at	D	FBXO33	F-box protein 33	Other	other
-0.356	8.11	6.09e-05	1429040_at		6820431F20Rik	cadherin 11 pseudogene	Other	other
-0.356	7.655	0.000704	1440437_at		HERC1	HECT and RLD domain containing E3 ubiquitin protein ligase family member 1	Cytoplasm	other
-0.355	9.179	0.000602	1424525_at		GRP	gastrin-releasing peptide	Extracellular Space	growth factor
-0.355	9.027	0.00322	1438408_at		SOWAHB	sosondowah ankyrin repeat domain family member B	Nucleus	transcription regulator
-0.353	8.916	0.000102	1436895_at	D	ARAP2	ArfGAP with RhoGAP domain, ankyrin repeat and PH domain 2	Cytoplasm	other
-0.352	8.624	0.000563	1425660_at		BTBD3	BTB (POZ) domain containing 3	Other	other
-0.352	8.467	0.000393	1428977_at		CHST8	carbohydrate (N-acetylgalactosamine 4-0) sulfotransferase 8	Cytoplasm	enzyme
-0.351	12.18	0.000202	1419473_a_at		CCK	cholecystokinin	Extracellular Space	other
-0.351	8.926	0.00032	1454780_at		GALNT18	polypeptide N-acetylgalactosaminyltransferase 18	Cytoplasm	enzyme
-0.351	8.06	0.00053	1456495_s_at		OSBPL6	oxysterol binding protein-like 6	Cytoplasm	other
-0.351	10.26	2.29e-05	1453060_at		RGS8	regulator of G-protein signaling 8	Cytoplasm	other
-0.35	8.459	0.000765	1437030_at		PLCD4	phospholipase C, delta 4	Cytoplasm	enzyme
-0.35	6.395	0.00232	1456210_at		PROSER2	proline and serine rich 2	Other	other
-0.349	8.308	4.91e-05	1427392_at		DSCAML1	Down syndrome cell adhesion molecule like 1	Plasma Membrane	other
-0.349	5.82	0.0019	1427182_s_at		LDLRAD4	low density lipoprotein receptor class A domain containing 4	Other	other
-0.349	10.848	0.000181	1420911_a_at		MFGE8	milk fat globule-EGF factor 8 protein	Extracellular Space	other
-0.349	8.403	0.000729	1417644_at		SSPN	sarcospan	Plasma Membrane	other
-0.349	9.12	0.00184	1456130_at		THSD7A	thrombospondin, type I, domain containing 7A	Other	other
-0.348	8.553	5.35e-05	1416410_at		PAFAH1B3	platelet-activating factor acetylhydrolase 1b, catalytic subunit 3 (29kDa)	Cytoplasm	enzyme
-0.347	8.612	0.00104	1438801_at		DNM3	dynamin 3	Cytoplasm	enzyme
-0.347	9.671	0.000217	1449885_at	D	TMEM47	transmembrane protein 47	Plasma Membrane	other
-0.347	9.776	0.00299	1437472_at		UNC13A	unc-13 homolog A (C. elegans)	Plasma Membrane	other
-0.346	10.31	9.31e-06	1458385_at		HSPA4L	heat shock 70kDa protein 4-like	Cytoplasm	other
-0.346	10.304	0.000243	1436309_at		NETO2	neuropilin (NRP) and tolloid (TLL)-like 2	Plasma Membrane	other
-0.346	11.998	0.000739	1438201_at		PDP1	pyruvate dehyrogenase phosphatase catalytic subunit 1	Cytoplasm	phosphatase
-0.346	11.977	0.000275	1416211_a_at		PTN	pleiotrophin	Extracellular Space	growth factor
-0.346	5.948	5.82e-05	1441667_s_at		SMYD1	SET and MYND domain containing 1	Nucleus	transcription regulator
-0.345	8.399	0.00043	1426336_at		CACNG7	calcium channel, voltage-dependent, gamma subunit 7	Plasma Membrane	ion channel
-0.345	6.828	0.00347	1439247_at		DOCK10	dedicator of cytokinesis 10	Cytoplasm	other
-0.345	7.716	0.00331	1449205_at		OVOL2	ovo-like zinc finger 2	Nucleus	transcription regulator
-0.344	10.863	0.000109	1426301_at	D	ALCAM	activated leukocyte cell adhesion molecule	Plasma Membrane	other
-0.344	8.164	0.00181	1436131_at		Siglech	sialic acid binding Ig-like lectin H	Plasma Membrane	other
-0.343	11.121	8.89e-05	1419225_at		CACNA2D3	calcium channel, voltage-dependent, alpha 2/delta subunit 3	Plasma Membrane	ion channel	pregabalin
-0.343	8.603	0.000262	1450869_at		FGF1	fibroblast growth factor 1 (acidic)	Extracellular Space	growth factor	pentosan polysulfate
-0.343	8.797	0.000792	1418260_at		HUNK	hormonally up-regulated Neu-associated kinase	Cytoplasm	kinase
-0.342	11.098	2.3e-05	1452089_at		CACNB4	calcium channel, voltage-dependent, beta 4 subunit	Plasma Membrane	ion channel	verapamil, mibefradil, nimodipine, trandolapril/verapamil
-0.342	7.214	0.00215	1424570_at		DDX46	DEAD (Asp-Glu-Ala-Asp) box polypeptide 46	Nucleus	enzyme
-0.342	7.878	0.00177	1458421_at		KCNQ3	potassium voltage-gated channel, KQT-like subfamily, member 3	Plasma Membrane	ion channel	ezogabine
-0.342	9.812	0.00369	1433413_at		NRXN1	neurexin 1	Plasma Membrane	transporter
-0.341	9.529	0.00227	1436127_at		CRHBP	corticotropin releasing hormone binding protein	Extracellular Space	other
-0.341	12.853	1.78e-05	1455436_at		DIRAS2	DIRAS family, GTP-binding RAS-like 2	Plasma Membrane	enzyme
-0.34	11.154	0.00125	1422018_at	D	HIVEP2	human immunodeficiency virus type I enhancer binding protein 2	Nucleus	transcription regulator
-0.34	10.543	5.02e-05	1449158_at		KCNK2	potassium channel, subfamily K, member 2	Plasma Membrane	ion channel	dofetilide
-0.339	10.364	0.000105	1433574_at		CDC37L1	cell division cycle 37-like 1	Cytoplasm	other
-0.339	8.429	0.000524	1419651_at		NKAIN1	Na+/K+ transporting ATPase interacting 1	Other	other
-0.338	7.573	0.00203	1453771_at		GULP1	GULP, engulfment adaptor PTB domain containing 1	Cytoplasm	other
-0.337	7.911	0.000245	1440374_at		PDE1C	phosphodiesterase 1C, calmodulin-dependent 70kDa	Cytoplasm	enzyme
-0.336	12.486	0.00194	1423853_at		LAMP5	lysosomal-associated membrane protein family, member 5	Cytoplasm	other
-0.336	8.596	0.000782	1437989_at	D	PDE8B	phosphodiesterase 8B	Cytoplasm	enzyme	ketotifen
-0.335	6.786	0.000474	1441728_at		SCN1A	sodium channel, voltage-gated, type I, alpha subunit	Plasma Membrane	ion channel	articaine/epinephrine, articaine, chloroprocaine, epinephrine/prilocaine, epinephrine/lidocaine, phenacemide, fosphenytoin, phentermine/topiramate, phenytoin, prilocaine, lamotrigine, lidocaine, riluzole, penicillin G/procaine, phenazopyridine, zonisamide, ropivacaine, procaine, permethrin, topiramate
-0.335	10.33	0.000137	1455698_at	D	SEC62	SEC62 homolog (S. cerevisiae)	Cytoplasm	transporter
-0.335	7.464	0.00139	1455123_at		ST18	suppression of tumorigenicity 18, zinc finger	Nucleus	transcription regulator
-0.335	7.179	0.0016	1449578_at		SUPT16H	suppressor of Ty 16 homolog (S. cerevisiae)	Nucleus	transcription regulator
-0.334	10.582	0.00264	1430375_a_at	D	Ccl27a	chemokine (C-C motif) ligand 27A	Extracellular Space	cytokine
-0.333	8.046	0.00102	1452303_at		ARHGEF10	Rho guanine nucleotide exchange factor (GEF) 10	Cytoplasm	enzyme
-0.331	10.715	0.000205	1428680_at	D	CDS1	CDP-diacylglycerol synthase (phosphatidate cytidylyltransferase) 1	Cytoplasm	enzyme
-0.331	7.076	0.00173	1443262_at		MRPS14	mitochondrial ribosomal protein S14	Cytoplasm	other
-0.331	5.379	0.00333	1460062_at		PLEKHH2	pleckstrin homology domain containing, family H (with MyTH4 domain) member 2	Cytoplasm	other
-0.33	10.033	5.64e-06	1445504_at		Gm5124	nucleolar and coiled-body phosphoprotein 1 pseudogene	Other	other
-0.33	11.276	0.000481	1434470_at		SYT13	synaptotagmin XIII	Plasma Membrane	transporter
-0.329	6.648	0.000626	1458417_at		KDM3B	lysine (K)-specific demethylase 3B	Nucleus	other
-0.329	6.879	0.000322	1452655_at	D	ZDHHC2	zinc finger, DHHC-type containing 2	Nucleus	enzyme
-0.328	10.639	4.34e-05	1425810_a_at	D	CSRP1	cysteine and glycine-rich protein 1	Nucleus	other
-0.328	8.559	6.48e-05	1434776_at		SEMA5A	sema domain, seven thrombospondin repeats (type 1 and type 1-like), transmembrane domain (TM) and short cytoplasmic domain, (semaphorin) 5A	Plasma Membrane	transmembrane receptor
-0.327	9.762	7.41e-05	1424767_at		CDH22	cadherin 22, type 2	Plasma Membrane	other
-0.327	6.378	0.00329	1437372_at	D	CPSF6	cleavage and polyadenylation specific factor 6, 68kDa	Nucleus	other
-0.327	7.355	0.000459	1428449_at	D	GTF3C2	general transcription factor IIIC, polypeptide 2, beta 110kDa	Nucleus	transcription regulator
-0.327	10.515	0.00219	1451047_at	D	ITM2A	integral membrane protein 2A	Plasma Membrane	other
-0.327	11.946	0.000147	1451961_a_at	D	MBP	myelin basic protein	Extracellular Space	other
-0.327	10.467	0.000352	1435971_at		RIMS3	regulating synaptic membrane exocytosis 3	Plasma Membrane	other
-0.326	5.669	0.000391	1428571_at		COL9A1	collagen, type IX, alpha 1	Extracellular Space	other	collagenase clostridium histolyticum
-0.326	5.765	0.00102	1440096_at		ECM2	extracellular matrix protein 2, female organ and adipocyte specific	Extracellular Space	other
-0.326	9.295	0.000424	1423325_at		PNN	pinin, desmosome associated protein	Plasma Membrane	other
-0.326	9.708	0.000899	1450143_at	D	RASGRP1	RAS guanyl releasing protein 1 (calcium and DAG-regulated)	Cytoplasm	other
-0.326	9.483	0.000374	1455625_at		TAF10	TAF10 RNA polymerase II, TATA box binding protein (TBP)-associated factor, 30kDa	Nucleus	transcription regulator
-0.326	9.597	0.000986	1427114_at		TTC19	tetratricopeptide repeat domain 19	Cytoplasm	other
-0.325	10.338	4.48e-05	1459903_at		SEMA7A	semaphorin 7A, GPI membrane anchor (John Milton Hagen blood group)	Plasma Membrane	transmembrane receptor
-0.324	9.346	0.000616	1435770_at	D	TMX4	thioredoxin-related transmembrane protein 4	Cytoplasm	enzyme
-0.323	8.769	0.0021	1423287_at		CBLN1	cerebellin 1 precursor	Cytoplasm	other
-0.323	9.785	0.0027	1431170_at		EFNA3	ephrin-A3	Plasma Membrane	kinase
-0.323	8.409	0.000785	1434992_at		ZFR2	zinc finger RNA binding protein 2	Other	other
-0.322	9.628	0.000643	1428978_at	D	2900009J20Rik	RIKEN cDNA 2900009J20 gene	Other	other
-0.322	10.674	4.52e-05	1426649_at		TMEFF1	transmembrane protein with EGF-like and two follistatin-like domains 1	Plasma Membrane	other
-0.321	11.275	0.000462	1435204_at		PRMT8	protein arginine methyltransferase 8	Nucleus	enzyme
-0.32	9.552	8.44e-05	1415804_at	D	CX3CL1	chemokine (C-X3-C motif) ligand 1	Extracellular Space	cytokine
-0.32	9.661	0.00273	1427416_x_at	D	DUSP7	dual specificity phosphatase 7	Cytoplasm	phosphatase
-0.32	11.244	0.000256	1417279_at	D	ITPR1	inositol 1,4,5-trisphosphate receptor, type 1	Cytoplasm	ion channel
-0.32	6.912	0.00226	1437268_at		LANCL3	LanC lantibiotic synthetase component C-like 3 (bacterial)	Other	other
-0.32	9.304	0.00392	1451601_a_at		SPNS2	spinster homolog 2 (Drosophila)	Other	transporter
-0.319	8.872	0.000369	1449987_at		ALK	anaplastic lymphoma receptor tyrosine kinase	Plasma Membrane	kinase	crizotinib, ceritinib, alectinib
-0.319	9.517	0.0028	1425600_a_at		PLCB1	phospholipase C, beta 1 (phosphoinositide-specific)	Cytoplasm	enzyme
-0.319	8.563	3.97e-05	1455724_at		PRRG1	proline rich Gla (G-carboxyglutamic acid) 1	Plasma Membrane	other
-0.319	9.151	0.0024	1440195_at		SERBP1	SERPINE1 mRNA binding protein 1	Cytoplasm	other
-0.318	9.993	0.00275	1418472_at		ASPA	aspartoacylase	Cytoplasm	enzyme
-0.318	9.938	0.00023	1448507_at		EFHD1	EF-hand domain family, member D1	Cytoplasm	other
-0.318	6.355	0.000869	1443877_a_at		RAPGEF6	Rap guanine nucleotide exchange factor (GEF) 6	Plasma Membrane	other
-0.317	8.995	0.00194	1439078_at		KLHL4	kelch-like family member 4	Cytoplasm	other
-0.317	7.34	0.00112	1458882_at		SERPINB8	serpin peptidase inhibitor, clade B (ovalbumin), member 8	Cytoplasm	other
-0.316	9.437	0.000251	1426225_at		RBP4	retinol binding protein 4, plasma	Extracellular Space	transporter
-0.316	7.468	6.66e-05	1419277_at		USP48	ubiquitin specific peptidase 48	Plasma Membrane	peptidase
-0.315	11.184	0.00159	1435745_at		KIAA0930	KIAA0930	Other	other
-0.315	10.569	0.000269	1438452_at		Nebl	nebulette	Cytoplasm	other
-0.315	8.072	0.000189	1460426_at		PDE4DIP	phosphodiesterase 4D interacting protein	Cytoplasm	enzyme
-0.315	10.475	0.00297	1423044_at		PROSC	proline synthetase co-transcribed homolog (bacterial)	Cytoplasm	enzyme
-0.313	7.571	0.000198	1421032_a_at		DNAJB12	DnaJ (Hsp40) homolog, subfamily B, member 12	Cytoplasm	other
-0.313	11.757	0.000356	1442021_at		GNAL	guanine nucleotide binding protein (G protein), alpha activating activity polypeptide, olfactory type	Cytoplasm	enzyme
-0.313	9.995	0.00384	1430981_s_at		GPBP1	GC-rich promoter binding protein 1	Nucleus	transcription regulator
-0.313	11.598	0.000324	1417151_a_at		NTSR2	neurotensin receptor 2	Plasma Membrane	G-protein coupled receptor	levocabastine
-0.313	10.516	0.00282	1423544_at		PTPN5	protein tyrosine phosphatase, non-receptor type 5 (striatum-enriched)	Plasma Membrane	phosphatase
-0.313	9.407	1.58e-05	1460286_at	D	SEPT6	septin 6	Cytoplasm	other
-0.312	8.948	0.000643	1435417_at		KIAA1161	KIAA1161	Nucleus	other
-0.31	8.732	0.000158	1419285_s_at	D	CYHR1	cysteine/histidine-rich 1	Other	other
-0.31	9.02	0.000357	1448692_at	D	UBQLN4	ubiquilin 4	Cytoplasm	other
-0.31	9.606	0.000689	1420833_at		VAMP2	vesicle-associated membrane protein 2 (synaptobrevin 2)	Plasma Membrane	other	botulinum toxin type B
-0.309	9.385	0.00361	1455901_at	D	CHPT1	choline phosphotransferase 1	Cytoplasm	enzyme
-0.309	8.445	0.00127	1437401_at	D	IGF1	insulin-like growth factor 1 (somatomedin C)	Extracellular Space	growth factor
-0.309	8.696	0.00194	1422896_at		VAMP4	vesicle-associated membrane protein 4	Cytoplasm	other
-0.308	9.747	0.000864	1423894_a_at		DALRD3	DALR anticodon binding domain containing 3	Other	other
-0.308	6.026	0.00217	1440799_s_at		FARP2	FERM, RhoGEF and pleckstrin domain protein 2	Cytoplasm	other
-0.308	9.326	9.44e-05	1423389_at	D	SMAD7	SMAD family member 7	Nucleus	transcription regulator
-0.307	9.231	0.000224	1435512_at		CCDC184	coiled-coil domain containing 184	Cytoplasm	other
-0.307	9.234	0.000165	1436596_at		H2AFV	H2A histone family, member V	Nucleus	other
-0.307	12.468	0.000273	1449003_a_at		VTI1B	vesicle transport through interaction with t-SNAREs 1B	Plasma Membrane	transporter
-0.306	7.336	0.00283	1454891_at		CDS2	CDP-diacylglycerol synthase (phosphatidate cytidylyltransferase) 2	Cytoplasm	enzyme
-0.306	8.6	0.000692	1438255_at	D	Foxn3	forkhead box N3	Other	other
-0.306	10.068	0.00316	1453059_at		MLIP	muscular LMNA-interacting protein	Nucleus	other
-0.305	9.214	0.000165	1439894_at		A730056I06Rik	RIKEN cDNA A730056I06 gene	Other	other
-0.305	8.724	0.00024	1417430_at		CDR2	cerebellar degeneration-related protein 2, 62kDa	Cytoplasm	other
-0.305	8.544	0.00059	1435635_at	D	PCMTD1	protein-L-isoaspartate (D-aspartate) O-methyltransferase domain containing 1	Cytoplasm	enzyme
-0.305	9.85	0.00175	1448945_at		PLLP	plasmolipin	Plasma Membrane	transporter
-0.304	8.93	0.00138	1428384_at		LURAP1L	leucine rich adaptor protein 1-like	Other	other
-0.304	9.315	0.00175	1424078_s_at	D	PEX6	peroxisomal biogenesis factor 6	Cytoplasm	enzyme
-0.303	9.119	0.0013	1455164_at		ARHGAP31	Rho GTPase activating protein 31	Cytoplasm	other
-0.303	8.576	0.000603	1450005_x_at		DLK2	delta-like 2 homolog (Drosophila)	Extracellular Space	other
-0.303	10.123	0.000868	1450241_a_at		EVI2A	ecotropic viral integration site 2A	Plasma Membrane	transmembrane receptor
-0.302	7.292	0.00164	1458464_at	D	HECW2	HECT, C2 and WW domain containing E3 ubiquitin protein ligase 2	Extracellular Space	enzyme
-0.302	10.961	0.00219	1450010_at	D	HSD17B12	hydroxysteroid (17-beta) dehydrogenase 12	Cytoplasm	enzyme
-0.302	7.797	0.00116	1418984_at		INADL	InaD-like (Drosophila)	Plasma Membrane	other
-0.302	10.306	0.00197	1420895_at		TGFBR1	transforming growth factor, beta receptor 1	Plasma Membrane	kinase
-0.301	13.125	4.94e-05	1416178_a_at		PLEKHB1	pleckstrin homology domain containing, family B (evectins) member 1	Cytoplasm	other
-0.301	11.726	9.54e-05	1435387_at		SLC2A13	solute carrier family 2 (facilitated glucose transporter), member 13	Plasma Membrane	transporter
-0.3	11.473	3.19e-05	1417946_at		ABHD3	abhydrolase domain containing 3	Other	enzyme
-0.3	7.456	0.00357	1431717_at	D	AKAP5	A kinase (PRKA) anchor protein 5	Plasma Membrane	other
-0.3	6.494	0.00018	1425693_at		BRAF	v-raf murine sarcoma viral oncogene homolog B	Cytoplasm	enzyme	vemurafenib, dabrafenib, regorafenib, bortezomib/sorafenib, dexamethasone/lenalidomide/sorafenib, bevacizumab/sorafenib, LGX-818, dabrafenib/trametinib, sorafenib
-0.3	11.431	0.000284	1423947_at	D	C9orf16	chromosome 9 open reading frame 16	Other	other
-0.3	8.305	0.00118	1458932_at		PEX5L	peroxisomal biogenesis factor 5-like	Cytoplasm	ion channel
-0.3	11.85	7.51e-05	1448729_a_at	D	SEPT4	septin 4	Cytoplasm	enzyme
-0.3	8.37	0.00103	1434644_at	D	TBL1X	transducin (beta)-like 1X-linked	Nucleus	transcription regulator
-0.299	8.617	0.00287	1417680_at		KCNA5	potassium voltage-gated channel, shaker-related subfamily, member 5	Plasma Membrane	ion channel	dextromethorphan/quinidine, nicorandil, amiodarone, flecainide, quinidine
-0.299	9.816	0.00217	1429348_at		SEMA3C	sema domain, immunoglobulin domain (Ig), short basic domain, secreted, (semaphorin) 3C	Extracellular Space	other
-0.298	7.222	0.00223	1443888_at		AU023762	expressed sequence AU023762	Other	other
-0.298	10.385	6.49e-05	1455896_a_at	D	KCNK1	potassium channel, subfamily K, member 1	Plasma Membrane	ion channel
-0.298	11.149	2.88e-05	1425533_a_at	D	STAU2	staufen double-stranded RNA binding protein 2	Cytoplasm	other
-0.297	10.982	0.000311	1428443_a_at		RAP1GAP	RAP1 GTPase activating protein	Cytoplasm	other
-0.297	10.565	0.000132	1451008_at		ST8SIA3	ST8 alpha-N-acetyl-neuraminide alpha-2,8-sialyltransferase 3	Cytoplasm	enzyme
-0.296	9.477	0.00199	1434126_at		C20orf194	chromosome 20 open reading frame 194	Nucleus	other
-0.296	7.361	0.00198	1418459_at	D	CCDC91	coiled-coil domain containing 91	Other	other
-0.296	10.342	0.000293	1423179_at	D	KCNB1	potassium voltage-gated channel, Shab-related subfamily, member 1	Plasma Membrane	ion channel
-0.296	9.603	0.00308	1439940_at		SLC1A2	solute carrier family 1 (glial high affinity glutamate transporter), member 2	Plasma Membrane	transporter	riluzole
-0.296	7.346	0.00225	1458203_at		SPIRE1	spire-type actin nucleation factor 1	Cytoplasm	other
-0.295	6.949	0.00023	1450211_at		LRP1B	low density lipoprotein receptor-related protein 1B	Plasma Membrane	transmembrane receptor
-0.294	10.39	0.00331	1456174_x_at	D	NDRG1	N-myc downstream regulated 1	Nucleus	kinase
-0.294	9.178	0.00227	1447808_s_at	D	SLC15A2	solute carrier family 15 (oligopeptide transporter), member 2	Plasma Membrane	transporter
-0.293	8.677	0.000457	1427077_a_at	D	Ap2b1	adaptor-related protein complex 2, beta 1 subunit	Plasma Membrane	other
-0.293	12.125	0.000617	1423664_at		QDPR	quinoid dihydropteridine reductase	Cytoplasm	enzyme
-0.293	7.117	0.0018	1434857_at		Zfp783	zinc finger protein 783	Other	other
-0.293	7.951	0.00023	1422810_at		ZNF24	zinc finger protein 24	Nucleus	transcription regulator
-0.292	6.831	0.000901	1435275_at		COX6B2	cytochrome c oxidase subunit VIb polypeptide 2 (testis)	Cytoplasm	enzyme
-0.292	11.152	0.000393	1422834_at	D	KCND2	potassium voltage-gated channel, Shal-related subfamily, member 2	Plasma Membrane	ion channel	dalfampridine
-0.292	8.703	0.00143	1421193_a_at		PBX3	pre-B-cell leukemia homeobox 3	Nucleus	transcription regulator
-0.291	8.407	0.0011	1448327_at		ACTN2	actinin, alpha 2	Nucleus	transcription regulator
-0.291	11.075	3.26e-05	1426743_at		APPL2	adaptor protein, phosphotyrosine interaction, PH domain and leucine zipper containing 2	Cytoplasm	other
-0.291	9.097	0.00177	1427251_at	D	ATP2A2	ATPase, Ca++ transporting, cardiac muscle, slow twitch 2	Cytoplasm	transporter
-0.291	8.2	0.00131	1426288_at		LRP4	low density lipoprotein receptor-related protein 4	Extracellular Space	other
-0.29	11.281	0.00021	1458534_at	D	RGS7BP	regulator of G-protein signaling 7 binding protein	Cytoplasm	other
-0.29	10.045	0.00034	1451640_a_at		Rsrc2	arginine/serine-rich coiled-coil 2	Other	other
-0.29	10.953	0.00275	1436618_at		SFXN5	sideroflexin 5	Cytoplasm	transporter
-0.29	7.715	0.00105	1430511_at		UNC13C	unc-13 homolog C (C. elegans)	Cytoplasm	other
-0.289	7.583	0.000229	1432073_at		PTGES3L	prostaglandin E synthase 3 (cytosolic)-like	Other	other
-0.288	8.065	0.00154	1457709_a_at		A930005H10Rik	RIKEN cDNA A930005H10 gene	Other	other
-0.288	10.749	0.000402	1420403_at	D	ATP2B2	ATPase, Ca++ transporting, plasma membrane 2	Plasma Membrane	transporter
-0.288	9.686	0.0024	1430303_at		CEP83	centrosomal protein 83kDa	Extracellular Space	other
-0.288	7.227	0.00144	1431035_at		DAAM1	dishevelled associated activator of morphogenesis 1	Cytoplasm	other
-0.288	9.038	0.000603	1454818_at		GMEB2	glucocorticoid modulatory element binding protein 2	Nucleus	transcription regulator
-0.288	8.485	0.00132	1459984_at		MIA3	melanoma inhibitory activity family, member 3	Cytoplasm	other
-0.288	8.264	0.00282	1442099_at		USP31	ubiquitin specific peptidase 31	Nucleus	peptidase
-0.287	10.903	0.000625	1440455_at		CAMK2N1	calcium/calmodulin-dependent protein kinase II inhibitor 1	Plasma Membrane	kinase
-0.287	9.034	0.00254	1422733_at		FJX1	four jointed box 1 (Drosophila)	Extracellular Space	other
-0.287	8.119	0.0038	1431229_at		IPW	imprinted in Prader-Willi syndrome (non-protein coding)	Other	other
-0.287	6.84	0.003	1458119_at		SLC25A27	solute carrier family 25, member 27	Cytoplasm	transporter
-0.286	7.828	0.0039	1436187_at		1110054M08Rik	RIKEN cDNA 1110054M08 gene	Other	other
-0.286	7.891	0.000482	1428798_s_at		SETD6	SET domain containing 6	Nucleus	enzyme
-0.286	9.71	0.000225	1448706_at		TDP2	tyrosyl-DNA phosphodiesterase 2	Cytoplasm	transcription regulator
-0.285	8.747	8.5e-05	1419429_at		CNTFR	ciliary neurotrophic factor receptor	Plasma Membrane	transmembrane receptor
-0.285	10.241	0.000225	1441170_a_at		DAB2IP	DAB2 interacting protein	Plasma Membrane	other
-0.284	8.057	6.79e-05	1426167_a_at		CAMK4	calcium/calmodulin-dependent protein kinase IV	Nucleus	kinase
-0.284	7.562	0.00295	1451800_at		GCC2	GRIP and coiled-coil domain containing 2	Cytoplasm	other
-0.284	11.58	0.00107	1422208_a_at		GNB5	guanine nucleotide binding protein (G protein), beta 5	Plasma Membrane	enzyme
-0.284	8.488	0.000876	1460200_s_at	D	LZTFL1	leucine zipper transcription factor-like 1	Cytoplasm	other
-0.284	8.035	0.00276	1424471_at		RAPGEF3	Rap guanine nucleotide exchange factor (GEF) 3	Nucleus	other
-0.283	10.336	0.0025	1429443_at		CPNE4	copine IV	Cytoplasm	other
-0.283	9.4	0.000215	1460278_a_at	D	DESI1	desumoylating isopeptidase 1	Other	other
-0.283	7.778	0.00107	1433994_at		KIAA0355	KIAA0355	Extracellular Space	other
-0.283	10.73	0.00011	1434864_at		NIPA1	non imprinted in Prader-Willi/Angelman syndrome 1	Plasma Membrane	other
-0.283	8.236	0.0018	1437403_at		SAMD5	sterile alpha motif domain containing 5	Other	other
-0.283	6.815	0.000376	1457351_at		TAF2	TAF2 RNA polymerase II, TATA box binding protein (TBP)-associated factor, 150kDa	Nucleus	transcription regulator
-0.283	7.837	0.000263	1456215_at		TFAM	transcription factor A, mitochondrial	Cytoplasm	transcription regulator
-0.282	11.074	0.000159	1428620_at		ENSA	endosulfine alpha	Cytoplasm	transporter
-0.282	9.823	0.000232	1450437_a_at		NCAM1	neural cell adhesion molecule 1	Plasma Membrane	other	BB-10901
-0.282	9.996	0.00189	1452053_a_at	D	TMEM33	transmembrane protein 33	Cytoplasm	other
-0.281	10.3	0.00161	1457589_at		FAT3	FAT atypical cadherin 3	Plasma Membrane	other
-0.281	6.65	0.00248	1440608_at		Gm19651	predicted gene, 19651	Other	other
-0.281	8.338	0.00179	1425870_a_at		KCNIP2	Kv channel interacting protein 2	Cytoplasm	other
-0.28	7.491	0.00168	1439986_at		DGKI	diacylglycerol kinase, iota	Cytoplasm	kinase
-0.28	10.972	0.00032	1449465_at		RELN	reelin	Extracellular Space	peptidase
-0.279	8.794	0.000745	1443904_at		FADS6	fatty acid desaturase 6	Other	enzyme
-0.279	10.665	0.00013	1437287_at		NADK2	NAD kinase 2, mitochondrial	Cytoplasm	kinase
-0.278	9.029	0.00063	1433545_s_at		ACAD11	acyl-CoA dehydrogenase family, member 11	Cytoplasm	enzyme
-0.278	8.844	0.00155	1457148_at		CSMD2	CUB and Sushi multiple domains 2	Other	other
-0.278	11.427	0.000569	1434339_at		Fnbp1l	formin binding protein 1-like	Cytoplasm	other
-0.278	8.763	0.000665	1425014_at		NR2C2	nuclear receptor subfamily 2, group C, member 2	Nucleus	ligand-dependent nuclear receptor
-0.278	9.233	0.00159	1456070_at		PTPRG	protein tyrosine phosphatase, receptor type, G	Plasma Membrane	phosphatase
-0.277	6.046	0.000823	1458183_at		2810039B14Rik	RIKEN cDNA 2810039B14 gene	Other	other
-0.277	9.381	0.00229	1423184_at	D	ITSN2	intersectin 2	Cytoplasm	other
-0.277	10.048	0.00133	1455636_at		LSAMP	limbic system-associated membrane protein	Plasma Membrane	other
-0.277	10.047	0.00168	1427261_at	D	WWC1	WW and C2 domain containing 1	Cytoplasm	transcription regulator
-0.276	7.715	0.000479	1432509_at		5033430I15Rik	RIKEN cDNA 5033430I15 gene	Other	other
-0.276	11.906	0.00162	1451280_at		ARPP21	cAMP-regulated phosphoprotein, 21kDa	Cytoplasm	other
-0.276	9.375	0.000468	1455230_at		CACNG4	calcium channel, voltage-dependent, gamma subunit 4	Plasma Membrane	ion channel
-0.276	9.822	0.00245	1449038_at		HSD11B1	hydroxysteroid (11-beta) dehydrogenase 1	Cytoplasm	enzyme
-0.276	9.674	0.00305	1428873_a_at	D	MSL1	male-specific lethal 1 homolog (Drosophila)	Nucleus	other
-0.275	11.027	0.00193	1455296_at		ADCY5	adenylate cyclase 5	Plasma Membrane	enzyme
-0.275	7.408	0.00282	1433762_at		C630043F03Rik	RIKEN cDNA C630043F03 gene	Other	other
-0.275	11.06	0.00105	1425020_at		UBXN2A	UBX domain protein 2A	Other	other
-0.274	10.076	0.00104	1427510_at		GNAI1	guanine nucleotide binding protein (G protein), alpha inhibiting activity polypeptide 1	Plasma Membrane	enzyme
-0.274	11.514	0.00254	1438251_x_at		HTRA1	HtrA serine peptidase 1	Extracellular Space	peptidase
-0.274	8.674	0.00162	1418008_at		PAXBP1	PAX3 and PAX7 binding protein 1	Nucleus	other
-0.274	7.601	0.00212	1428462_at		PPP2R5E	protein phosphatase 2, regulatory subunit B', epsilon isoform	Cytoplasm	phosphatase
-0.274	9.47	0.000563	1436356_at	D	SAMD4A	sterile alpha motif domain containing 4A	Cytoplasm	translation regulator
-0.273	10.679	0.00239	1460676_at		Gm10651/Josd1	Josephin domain containing 1	Other	other
-0.273	8.539	0.000284	1433672_at		TRMT2B	tRNA methyltransferase 2 homolog B (S. cerevisiae)	Cytoplasm	enzyme
-0.272	7.571	0.00271	1421199_at	D	DLG2	discs, large homolog 2 (Drosophila)	Plasma Membrane	kinase
-0.272	9.009	0.00114	1416132_at	D	EFR3A	EFR3 homolog A (S. cerevisiae)	Plasma Membrane	other
-0.272	10.219	0.000216	1416635_at		SMPDL3A	sphingomyelin phosphodiesterase, acid-like 3A	Extracellular Space	enzyme
-0.272	8.128	0.000923	1455210_at		ZHX2	zinc fingers and homeoboxes 2	Nucleus	transcription regulator
-0.271	9.176	0.000372	1435433_at		AGAP1	ArfGAP with GTPase domain, ankyrin repeat and PH domain 1	Cytoplasm	enzyme
-0.271	9.108	0.00172	1452123_s_at		FRMD4B	FERM domain containing 4B	Cytoplasm	other
-0.271	6.835	0.00202	1457143_at		Gm6556	predicted gene 6556	Other	other
-0.271	9.148	0.000397	1428751_at		PACRG	PARK2 co-regulated	Nucleus	other
-0.271	9.455	0.000623	1427699_a_at		PTPN11	protein tyrosine phosphatase, non-receptor type 11	Cytoplasm	phosphatase
-0.27	8.463	0.00116	1415936_at		BCAR3	breast cancer anti-estrogen resistance 3	Cytoplasm	other
-0.27	9.938	0.000283	1417885_at	D	MAPT	microtubule-associated protein tau	Plasma Membrane	other
-0.269	12.975	0.000183	1432466_a_at		APOE	apolipoprotein E	Extracellular Space	transporter
-0.269	8.461	0.00272	1450068_at		BAZ1B	bromodomain adjacent to zinc finger domain, 1B	Nucleus	transcription regulator
-0.269	7.837	0.000202	1460498_a_at		DNAJC5	DnaJ (Hsp40) homolog, subfamily C, member 5	Plasma Membrane	other
-0.269	7.856	0.00114	1445521_at	D	ELAVL1	ELAV like RNA binding protein 1	Cytoplasm	other
-0.269	10.694	0.000843	1435315_s_at		FAR1	fatty acyl CoA reductase 1	Cytoplasm	enzyme
-0.269	10.034	0.00037	1415903_at	D	SLC38A1	solute carrier family 38, member 1	Plasma Membrane	transporter
-0.268	7.953	0.000484	1416691_at		GTPBP2	GTP binding protein 2	Extracellular Space	enzyme
-0.268	11.531	0.00249	1420478_at	D	NAP1L1	nucleosome assembly protein 1-like 1	Nucleus	other
-0.267	10.618	0.00312	1455218_at		CCP110	centriolar coiled coil protein 110kDa	Cytoplasm	other
-0.267	8.197	0.000348	1422117_s_at		KHDRBS2	KH domain containing, RNA binding, signal transduction associated 2	Nucleus	other
-0.267	7.519	0.000198	1431936_a_at		NEU2	sialidase 2 (cytosolic sialidase)	Cytoplasm	enzyme
-0.267	10.513	5.18e-05	1454919_at		NMT2	N-myristoyltransferase 2	Cytoplasm	enzyme
-0.267	9.361	0.000923	1425415_a_at	D	SLC1A1	solute carrier family 1 (neuronal/epithelial high affinity glutamate transporter, system Xag), member 1	Plasma Membrane	transporter	riluzole
-0.266	10.155	0.000247	1453796_a_at		ERGIC2	ERGIC and golgi 2	Cytoplasm	other
-0.266	10.797	0.000163	1433566_at		RASL10B	RAS-like, family 10, member B	Other	enzyme
-0.266	8.11	0.00174	1432489_a_at	D	WDYHV1	WDYHV motif containing 1	Cytoplasm	other
-0.266	8.958	0.000328	1423825_at		WLS	wntless Wnt ligand secretion mediator	Cytoplasm	other
-0.266	8.529	0.00285	1426993_at		XPR1	xenotropic and polytropic retrovirus receptor 1	Plasma Membrane	G-protein coupled receptor
-0.265	9.501	0.000692	1442138_at		GPR62	G protein-coupled receptor 62	Plasma Membrane	G-protein coupled receptor
-0.265	8.747	0.00361	1424622_at		HSF1	heat shock transcription factor 1	Nucleus	transcription regulator
-0.265	9.042	0.000389	1455877_a_at		NANOS1	nanos homolog 1 (Drosophila)	Cytoplasm	translation regulator
-0.264	9.373	9.07e-05	1424666_at		GPATCH8	G patch domain containing 8	Other	other
-0.264	10.127	0.00295	1420484_a_at		VTN	vitronectin	Extracellular Space	other
-0.263	7.281	0.00379	1432850_at		5430434G16Rik	RIKEN cDNA 5430434G16 gene	Other	other
-0.263	10.225	0.000147	1435684_at	D	ABCC5	ATP-binding cassette, sub-family C (CFTR/MRP), member 5	Plasma Membrane	transporter
-0.263	9.515	0.00263	1437031_at	D	ACSL6	acyl-CoA synthetase long-chain family member 6	Cytoplasm	enzyme
-0.263	10.651	8.67e-05	1448335_s_at	D	CCNI	cyclin I	Other	other
-0.263	8.043	0.0013	1427227_at		GABRG1	gamma-aminobutyric acid (GABA) A receptor, gamma 1	Plasma Membrane	ion channel	pagoclone, alphadolone, SEP 174559, clobazam, nitrazepam, tracazolate, adinazolam, sevoflurane, isoflurane, gaboxadol, isoniazid, felbamate, etomidate, muscimol, halothane, fluoxetine/olanzapine, estazolam, clorazepate, eszopiclone, quazepam, amitriptyline/chlordiazepoxide, diazepam, temazepam, zolpidem, chlordiazepoxide, lorazepam, olanzapine, triazolam, clonazepam, flurazepam, midazolam, oxazep…
-0.262	10.192	0.000254	1450416_at		CBX5	chromobox homolog 5	Nucleus	transcription regulator
-0.262	7.799	0.00252	1430291_at		DOCK5	dedicator of cytokinesis 5	Cytoplasm	other
-0.261	7.225	0.00079	1419542_at		DAZ2	deleted in azoospermia 2	Cytoplasm	translation regulator
-0.261	9.347	0.000998	1441499_at		GRID1	glutamate receptor, ionotropic, delta 1	Plasma Membrane	ion channel
-0.26	11.363	0.00025	1426010_a_at	D	EPB41L3	erythrocyte membrane protein band 4.1-like 3	Plasma Membrane	other
-0.26	9.241	0.000845	1433493_at		FAM73B	family with sequence similarity 73, member B	Other	other
-0.26	11.29	0.00384	1425213_at		FAM81A	family with sequence similarity 81, member A	Other	other
-0.26	8.776	0.00141	1451143_at		FAM98C	family with sequence similarity 98, member C	Other	other
-0.26	9.878	0.0029	1433787_at		NELL1	NEL-like 1 (chicken)	Extracellular Space	growth factor
-0.259	8.055	0.0013	1415801_at		GJA1	gap junction protein, alpha 1, 43kDa	Plasma Membrane	transporter
-0.259	11.096	0.00171	1428535_at		KIAA1462	KIAA1462	Plasma Membrane	other
-0.259	10.106	0.00029	1432543_a_at		KLF13	Kruppel-like factor 13	Nucleus	transcription regulator
-0.259	7.151	0.000543	1431071_at		MTX3	metaxin 3	Other	other
-0.259	10.623	0.000935	1423592_at		ROCK2	Rho-associated, coiled-coil containing protein kinase 2	Cytoplasm	kinase
-0.258	9.229	0.00181	1418468_at		ANXA11	annexin A11	Nucleus	other
-0.258	9.028	0.0016	1442016_at		MRPL48	mitochondrial ribosomal protein L48	Cytoplasm	other
-0.258	10.985	0.000586	1419383_at	D	S100B	S100 calcium binding protein B	Cytoplasm	other
-0.258	10.148	0.00096	1429131_at		UBE2V2	ubiquitin-conjugating enzyme E2 variant 2	Cytoplasm	enzyme
-0.257	9.548	0.00373	1415975_at		CARHSP1	calcium regulated heat stable protein 1, 24kDa	Cytoplasm	other
-0.257	10.769	8.33e-05	1419489_at		FAM19A5	family with sequence similarity 19 (chemokine (C-C motif)-like), member A5	Extracellular Space	other
-0.257	7.296	0.0028	1416515_at		FSCN1	fascin actin-bundling protein 1	Cytoplasm	other
-0.257	10.366	0.000325	1437392_at		SYNDIG1	synapse differentiation inducing 1	Plasma Membrane	other
-0.257	8.439	0.000746	1425331_at		ZNF106	zinc finger protein 106	Cytoplasm	other
-0.256	10.043	0.000411	1424350_s_at	D	LPGAT1	lysophosphatidylglycerol acyltransferase 1	Cytoplasm	other
-0.256	9.621	0.000408	1456785_at		MED14	mediator complex subunit 14	Nucleus	transcription regulator
-0.256	9.289	0.000424	1449107_at		NUDT4	nudix (nucleoside diphosphate linked moiety X)-type motif 4	Cytoplasm	phosphatase
-0.256	7.271	0.00297	1425164_a_at		PHKG1	phosphorylase kinase, gamma 1 (muscle)	Cytoplasm	kinase
-0.256	7.635	0.000543	1451452_a_at		RGS16	regulator of G-protein signaling 16	Cytoplasm	other
-0.254	9.371	0.00149	1434143_at		ATMIN	ATM interactor	Nucleus	other
-0.254	8.612	0.000902	1427138_at		CCDC88C	coiled-coil domain containing 88C	Other	other
-0.254	10.564	0.000282	1436095_at		CHD5	chromodomain helicase DNA binding protein 5	Nucleus	enzyme
-0.254	7.96	0.00057	1423814_at		DDX41	DEAD (Asp-Glu-Ala-Asp) box polypeptide 41	Nucleus	enzyme
-0.254	10.523	0.00206	1424523_at		ELMO1	engulfment and cell motility 1	Cytoplasm	other
-0.254	10.058	0.00081	1425553_s_at		HIP1R	huntingtin interacting protein 1 related	Cytoplasm	other
-0.254	11.316	0.000981	1453317_a_at		KHDRBS3	KH domain containing, RNA binding, signal transduction associated 3	Nucleus	other
-0.254	8.634	0.000791	1435914_at		NCOR1	nuclear receptor corepressor 1	Nucleus	transcription regulator
-0.254	11.09	0.00127	1424567_at		TSPAN2	tetraspanin 2	Extracellular Space	other
-0.253	11.209	0.000415	1455462_at		ADCY2	adenylate cyclase 2 (brain)	Plasma Membrane	enzyme
-0.253	10.45	0.000414	1418442_at		XPO1	exportin 1	Nucleus	transporter
-0.253	11.689	0.000726	1428434_at		ZCCHC12	zinc finger, CCHC domain containing 12	Nucleus	transcription regulator
-0.253	9.481	0.00274	1427255_s_at		ZNF445	zinc finger protein 445	Nucleus	transcription regulator
-0.252	8.09	0.00103	1425494_s_at		BMPR1A	bone morphogenetic protein receptor, type IA	Plasma Membrane	kinase
-0.252	9.019	0.00151	1417688_at		FAM20C	family with sequence similarity 20, member C	Extracellular Space	enzyme
-0.251	7.932	0.00186	1424259_at		LMF1	lipase maturation factor 1	Cytoplasm	other
-0.251	7.502	0.000541	1451730_at		ZFP62	ZFP62 zinc finger protein	Nucleus	other
-0.25	10.293	0.000689	1435923_at		ADO	2-aminoethanethiol (cysteamine) dioxygenase	Cytoplasm	other
-0.25	9.02	0.0003	1421834_at		PIP5K1B	phosphatidylinositol-4-phosphate 5-kinase, type I, beta	Cytoplasm	kinase
-0.25	11.3	0.00086	1435462_at	D	PLCXD2	phosphatidylinositol-specific phospholipase C, X domain containing 2	Other	enzyme
-0.25	9.798	0.000303	1433503_at		PTGR2	prostaglandin reductase 2	Cytoplasm	enzyme
-0.249	9.773	0.00145	1440962_at		SLC8A3	solute carrier family 8 (sodium/calcium exchanger), member 3	Plasma Membrane	transporter
-0.249	9.853	0.000764	1455228_at	D	WHSC1	Wolf-Hirschhorn syndrome candidate 1	Nucleus	enzyme
-0.248	10.251	0.00365	1420947_at	D	ATRX	alpha thalassemia/mental retardation syndrome X-linked	Nucleus	transcription regulator
-0.248	9.095	0.00144	1456397_at		CDH4	cadherin 4, type 1, R-cadherin (retinal)	Plasma Membrane	other
-0.248	8.178	0.000616	1417904_at		DCLRE1A	DNA cross-link repair 1A	Nucleus	other
-0.248	11.941	0.00165	1437211_x_at	D	ELOVL5	ELOVL fatty acid elongase 5	Cytoplasm	enzyme
-0.248	10.126	0.00141	1436827_at		GAREM	GRB2 associated, regulator of MAPK1	Other	other
-0.248	12.419	0.000871	1425942_a_at		GPM6B	glycoprotein M6B	Plasma Membrane	other
-0.248	9.638	0.00389	1424216_a_at		PAPOLA	poly(A) polymerase alpha	Nucleus	enzyme
-0.248	5.947	0.00336	1435399_at		SYNPO2	synaptopodin 2	Cytoplasm	other
-0.247	10.005	0.00326	1450684_at		ETV1	ets variant 1	Nucleus	transcription regulator
-0.247	11.738	0.00319	1449420_at		PDE1B	phosphodiesterase 1B, calmodulin-dependent	Cytoplasm	enzyme
-0.247	10.665	0.00311	1416501_at		PDPK1	3-phosphoinositide dependent protein kinase 1	Cytoplasm	kinase
-0.247	8.491	0.00122	1447623_s_at		PRKD1	protein kinase D1	Cytoplasm	kinase
-0.247	10.022	0.000256	1419673_at		SPOCK1	sparc/osteonectin, cwcv and kazal-like domains proteoglycan (testican) 1	Extracellular Space	other
-0.247	8.925	0.00283	1420506_a_at		STXBP1	syntaxin binding protein 1	Cytoplasm	transporter
-0.247	11.36	0.000295	1423395_at		TSNAX	translin-associated factor X	Nucleus	transporter
-0.247	9.582	0.00353	1430154_at		VPS13A	vacuolar protein sorting 13 homolog A (S. cerevisiae)	Cytoplasm	transporter
-0.246	9.117	0.00107	1453307_a_at		ANAPC5	anaphase promoting complex subunit 5	Nucleus	enzyme
-0.246	6.913	0.00328	1425321_a_at	D	CLMN	calmin (calponin-like, transmembrane)	Cytoplasm	other
-0.246	11.913	0.000218	1424986_s_at		FBXW7	F-box and WD repeat domain containing 7, E3 ubiquitin protein ligase	Nucleus	transcription regulator
-0.246	10.386	0.000597	1421978_at		GAD2	glutamate decarboxylase 2 (pancreatic islets and brain, 65kDa)	Cytoplasm	enzyme	valproic acid
-0.246	10.089	0.000522	1450875_at		GPR37	G protein-coupled receptor 37 (endothelin receptor type B-like)	Plasma Membrane	G-protein coupled receptor
-0.245	8.7	0.00183	1443612_at		ANO3	anoctamin 3	Plasma Membrane	transporter
-0.245	8.101	0.000687	1443986_at		CDC73	cell division cycle 73	Nucleus	other
-0.245	6.414	0.000795	1427289_at		DDHD1	DDHD domain containing 1	Extracellular Space	enzyme
-0.245	8.223	0.000685	1456232_at	D	GMEB1	glucocorticoid modulatory element binding protein 1	Nucleus	transcription regulator
-0.245	10.601	0.000348	1423559_at		KCNC1	potassium voltage-gated channel, Shaw-related subfamily, member 1	Plasma Membrane	ion channel
-0.245	9.771	0.0013	1426461_at	D	UGP2	UDP-glucose pyrophosphorylase 2	Cytoplasm	enzyme
-0.244	10.935	0.000668	1426885_a_at	D	CDK2AP1	cyclin-dependent kinase 2 associated protein 1	Nucleus	other
-0.244	9.631	0.000168	1449036_at		RNF128	ring finger protein 128, E3 ubiquitin protein ligase	Cytoplasm	enzyme
-0.244	9.896	0.00181	1428731_at		USP54	ubiquitin specific peptidase 54	Other	peptidase
-0.243	9.754	0.00201	1418591_at		DNAJA4	DnaJ (Hsp40) homolog, subfamily A, member 4	Nucleus	other
-0.243	11.141	0.000221	1423085_at		EFNB3	ephrin-B3	Plasma Membrane	kinase
-0.243	7.111	0.0022	1435452_at		SLC35G1	solute carrier family 35, member G1	Plasma Membrane	other
-0.242	7.299	0.00213	1456706_at		4833441D16Rik	RIKEN cDNA 4833441D16 gene	Other	other
-0.242	8.401	0.00233	1435031_at		TMEM120A	transmembrane protein 120A	Other	other
-0.241	7.49	0.00166	1455061_a_at		ACAA2	acetyl-CoA acyltransferase 2	Cytoplasm	enzyme
-0.241	8.366	0.000549	1448390_a_at		DHRS3	dehydrogenase/reductase (SDR family) member 3	Cytoplasm	enzyme
-0.24	8.472	0.000635	1425465_a_at		SENP2	SUMO1/sentrin/SMT3 specific peptidase 2	Nucleus	peptidase
-0.24	10.165	0.000733	1424211_at		SLC25A33	solute carrier family 25 (pyrimidine nucleotide carrier), member 33	Cytoplasm	other
-0.24	7.364	0.00249	1418345_at		TNFSF13	tumor necrosis factor (ligand) superfamily, member 13	Extracellular Space	cytokine
-0.24	8.384	0.00341	1428941_at		ZMYM2	zinc finger, MYM-type 2	Nucleus	other
-0.239	8.556	0.00127	1426821_at		COG8	component of oligomeric golgi complex 8	Cytoplasm	transporter
-0.239	10.49	0.000321	1422795_at	D	CUL3	cullin 3	Nucleus	enzyme
-0.239	9.027	0.00222	1440487_at	D	DCC	deleted in colorectal carcinoma	Plasma Membrane	transmembrane receptor
-0.239	8.219	0.00173	1432478_a_at		RNF19B	ring finger protein 19B	Cytoplasm	other
-0.239	9.299	0.00213	1436656_at		TMEM150C	transmembrane protein 150C	Other	other
-0.239	7.734	0.00287	1445308_at		TSSC1	tumor suppressing subtransferable candidate 1	Other	other
-0.239	9.603	0.00338	1427112_at		TTL	tubulin tyrosine ligase	Cytoplasm	enzyme
-0.239	6.686	0.00191	1425206_a_at		UBE3A	ubiquitin protein ligase E3A	Nucleus	enzyme
-0.238	11.518	0.00191	1449381_a_at		PACSIN1	protein kinase C and casein kinase substrate in neurons 1	Cytoplasm	kinase
-0.238	9.05	0.0027	1426160_a_at		STK16	serine/threonine kinase 16	Cytoplasm	kinase
-0.238	9.584	0.000709	1434243_s_at		TOMM70A	translocase of outer mitochondrial membrane 70 homolog A (S. cerevisiae)	Cytoplasm	transporter
-0.237	8.561	0.00283	1419748_at		ABCD2	ATP-binding cassette, sub-family D (ALD), member 2	Cytoplasm	transporter
-0.237	9.941	0.000996	1438989_s_at		B130021B11Rik	RIKEN cDNA B130021B11 gene	Other	other
-0.237	10.431	0.000155	1421064_at	D	MPP5	membrane protein, palmitoylated 5 (MAGUK p55 subfamily member 5)	Plasma Membrane	kinase
-0.236	9.76	0.00244	1421960_at		ADCY3	adenylate cyclase 3	Plasma Membrane	enzyme
-0.236	10.289	0.000142	1419745_at		ARHGAP23	Rho GTPase activating protein 23	Cytoplasm	other
-0.236	9.024	0.000483	1443863_at		FNDC3A	fibronectin type III domain containing 3A	Cytoplasm	other
-0.236	9.412	0.000677	1417389_at		GPC1	glypican 1	Plasma Membrane	transmembrane receptor
-0.236	9.173	0.000231	1442867_at		MEGF11	multiple EGF-like-domains 11	Other	other
-0.236	9.418	0.000154	1434235_at		SLC20A2	solute carrier family 20 (phosphate transporter), member 2	Plasma Membrane	transporter
-0.235	7.328	0.000448	1459145_at		A930033H14Rik	RIKEN cDNA A930033H14 gene	Other	other
-0.235	10.126	0.000935	1419421_at		ANK1	ankyrin 1, erythrocytic	Plasma Membrane	other
-0.235	10.762	0.00158	1426465_at	D	DLGAP4	discs, large (Drosophila) homolog-associated protein 4	Plasma Membrane	other
-0.235	8.9	0.000564	1423066_at	D	DNMT3A	DNA (cytosine-5-)-methyltransferase 3 alpha	Nucleus	enzyme
-0.235	10.282	0.0015	1454759_at		GIT1	G protein-coupled receptor kinase interacting ArfGAP 1	Nucleus	kinase
-0.235	8.443	0.00141	1449245_at		GRIN2C	glutamate receptor, ionotropic, N-methyl D-aspartate 2C	Plasma Membrane	ion channel	dextromethorphan/morphine, neramexane, bicifadine, delucemine, nebostinel, besonprodil, UK-240455, tenocyclidine, dextromethorphan/quinidine, ketamine, felbamate, memantine, orphenadrine, cycloserine, N-(2-indanyl)glycinamide, dextromethorphan, brompheniramine/dextromethorphan/pseudoephedrine, chlorpheniramine/dextromethorphan/phenylephrine, carbinoxamine/dextromethorphan/pseudoephedrine, dextrom…
-0.235	10.411	0.00174	1450193_at		HCN1	hyperpolarization activated cyclic nucleotide-gated potassium channel 1	Plasma Membrane	ion channel
-0.235	9.323	0.00112	1449556_at		HLA-E	major histocompatibility complex, class I, E	Plasma Membrane	transmembrane receptor
-0.235	11.357	0.000209	1438677_at	D	PKP4	plakophilin 4	Plasma Membrane	other
-0.235	8.237	0.00341	1429501_s_at	D	PPM1A	protein phosphatase, Mg2+/Mn2+ dependent, 1A	Cytoplasm	phosphatase
-0.234	11.405	0.00294	1450466_at		CDK5R2	cyclin-dependent kinase 5, regulatory subunit 2 (p39)	Nucleus	other
-0.234	9.357	0.00272	1418321_at		ECI1	enoyl-CoA delta isomerase 1	Cytoplasm	enzyme
-0.234	8.736	0.00132	1420889_at		HCCS	holocytochrome c synthase	Cytoplasm	enzyme
-0.234	8.522	0.00025	1450661_x_at		NFIC	nuclear factor I/C (CCAAT-binding transcription factor)	Nucleus	transcription regulator
-0.234	11.288	0.000349	1455958_s_at		PPTC7	PTC7 protein phosphatase homolog (S. cerevisiae)	Cytoplasm	phosphatase
-0.234	10.738	0.000128	1452213_at		TEX2	testis expressed 2	Other	other
-0.233	9.53	0.000264	1431611_a_at		CADM1	cell adhesion molecule 1	Plasma Membrane	other
-0.233	10.261	0.000719	1426989_at		CLSTN3	calsyntenin 3	Plasma Membrane	other
-0.233	9.037	0.000729	1419072_at		GSTM2	glutathione S-transferase mu 2 (muscle)	Cytoplasm	enzyme
-0.232	7.756	0.00398	1452312_at		2810002D19Rik	RIKEN cDNA 2810002D19 gene	Other	other
-0.232	9.95	0.000879	1418585_at		CCNH	cyclin H	Nucleus	transcription regulator
-0.232	8.069	0.000694	1434922_at		PHF12	PHD finger protein 12	Nucleus	transcription regulator
-0.232	10.795	0.000563	1460336_at	D	PPARGC1A	peroxisome proliferator-activated receptor gamma, coactivator 1 alpha	Nucleus	transcription regulator
-0.232	8.015	0.000835	1416154_at		SRP54	signal recognition particle 54kDa	Cytoplasm	other
-0.232	9.761	0.00303	1450093_s_at		ZBTB7A	zinc finger and BTB domain containing 7A	Nucleus	transcription regulator
-0.231	8.922	0.00111	1453172_at		HSPA13	heat shock protein 70kDa family, member 13	Cytoplasm	other
-0.231	8.463	0.00109	1449180_at		KCMF1	potassium channel modulatory factor 1	Other	enzyme
-0.231	9.256	0.00183	1428835_at		MYH14	myosin, heavy chain 14, non-muscle	Extracellular Space	other
-0.231	9.475	0.00218	1428717_at		SCRN1	secernin 1	Cytoplasm	other
-0.231	9.15	0.00342	1416996_at		TBC1D8	TBC1 domain family, member 8 (with GRAM domain)	Plasma Membrane	other
-0.23	7.515	0.00146	1436663_at		C11orf84	chromosome 11 open reading frame 84	Other	other
-0.23	7.523	0.000802	1451119_a_at		FBLN1	fibulin 1	Extracellular Space	other
-0.23	10.771	0.000631	1434230_at		POLB	polymerase (DNA directed), beta	Nucleus	enzyme	nelarabine, cytarabine/fludarabine phosphate, lamivudine/nelfinavir/stavudine, cytarabine/daunorubicin, lamivudine/stavudine, lamivudine/nevirapine/stavudine, cladribine/cytarabine/daunorubicin, cytarabine/daunorubicin/tretinoin, cytarabine/idarubicin, cytarabine/etoposide, cytarabine/etoposide/mitoxantrone, cytarabine/dexamethasone, 5-azacytidine/cytarabine/decitabine, cytarabine/mitoxantrone, c…
-0.23	11.668	0.000779	1434096_at	D	SLC4A4	solute carrier family 4 (sodium bicarbonate cotransporter), member 4	Plasma Membrane	transporter
-0.23	8.974	0.00135	1416224_at		ZBTB17	zinc finger and BTB domain containing 17	Nucleus	transcription regulator
-0.229	10.598	0.00024	1416092_a_at	D	MAP4	microtubule-associated protein 4	Cytoplasm	other
-0.229	11.806	0.000671	1456387_at		NOL4	nucleolar protein 4	Nucleus	other
-0.229	7.869	0.000359	1417342_at		PPP1R2	protein phosphatase 1, regulatory (inhibitor) subunit 2	Cytoplasm	phosphatase
-0.228	9.969	0.001	1429188_at		COX11	cytochrome c oxidase assembly homolog 11 (yeast)	Cytoplasm	enzyme
-0.228	9.158	0.000534	1420532_at		MAGI2	membrane associated guanylate kinase, WW and PDZ domain containing 2	Plasma Membrane	kinase
-0.228	10.853	0.00039	1426449_a_at	D	PJA1	praja ring finger 1, E3 ubiquitin protein ligase	Cytoplasm	enzyme
-0.228	8.001	0.00103	1437842_at		Plcxd1	phosphatidylinositol-specific phospholipase C, X domain containing 1	Other	other
-0.227	11.125	0.00128	1426994_at		PHLPP1	PH domain and leucine rich repeat protein phosphatase 1	Cytoplasm	enzyme
-0.227	11.207	0.000231	1418926_at		ZEB1	zinc finger E-box binding homeobox 1	Nucleus	transcription regulator
-0.226	8.252	0.00326	1437667_a_at		BACH2	BTB and CNC homology 1, basic leucine zipper transcription factor 2	Nucleus	transcription regulator
-0.226	10.644	0.000464	1437912_at		IQSEC3	IQ motif and Sec7 domain 3	Cytoplasm	other
-0.226	8.118	0.0015	1429114_at		SESTD1	SEC14 and spectrin domains 1	Extracellular Space	other
-0.225	8.867	0.000601	1437763_at		DCUN1D3	DCN1, defective in cullin neddylation 1, domain containing 3	Cytoplasm	other
-0.225	9.462	0.00357	1455178_at		SGSM2	small G protein signaling modulator 2	Other	other
-0.225	8.99	0.000805	1427258_at		TRIM24	tripartite motif containing 24	Nucleus	transcription regulator
-0.224	8.748	0.00189	1416459_at		Arf2	ADP-ribosylation factor 2	Cytoplasm	other
-0.224	5.95	0.00171	1426959_at		BDH1	3-hydroxybutyrate dehydrogenase, type 1	Cytoplasm	enzyme
-0.224	7.983	0.000947	1425622_at		EDIL3	EGF-like repeats and discoidin I-like domains 3	Extracellular Space	other
-0.224	6.291	0.000198	1456629_at		KANK3	KN motif and ankyrin repeat domains 3	Cytoplasm	other
-0.224	12.882	0.000407	1448154_at		NDRG2	NDRG family member 2	Cytoplasm	other
-0.224	11.307	0.00162	1437107_at		RAB6B	RAB6B, member RAS oncogene family	Cytoplasm	enzyme
-0.223	9.371	0.0036	1436436_at		CNIH4	cornichon family AMPA receptor auxiliary protein 4	Plasma Membrane	other
-0.223	8.657	0.000471	1460460_a_at		GORASP2	golgi reassembly stacking protein 2, 55kDa	Cytoplasm	other
-0.223	9.124	0.000935	1418288_at		LPIN1	lipin 1	Nucleus	phosphatase
-0.223	10.143	0.000178	1450250_at		OTUD7A	OTU deubiquitinase 7A	Cytoplasm	peptidase
-0.223	10.83	0.00311	1426382_at	D	PPM1B	protein phosphatase, Mg2+/Mn2+ dependent, 1B	Cytoplasm	phosphatase
-0.223	7.449	0.00142	1440228_at		RANBP6	RAN binding protein 6	Cytoplasm	other
-0.223	12.694	0.00109	1416636_at		RHEB	Ras homolog enriched in brain	Cytoplasm	enzyme
-0.222	10.77	0.00024	1418611_at		GPR162	G protein-coupled receptor 162	Plasma Membrane	G-protein coupled receptor
-0.222	9.616	0.00123	1424052_at		THAP4	THAP domain containing 4	Extracellular Space	other
-0.221	7.145	0.00324	1420849_at		CRNKL1	crooked neck pre-mRNA splicing factor 1	Nucleus	other
-0.221	9.345	0.00101	1460041_at		FLRT1	fibronectin leucine rich transmembrane protein 1	Plasma Membrane	other
-0.221	8.827	0.00202	1436526_at		GNPTG	N-acetylglucosamine-1-phosphate transferase, gamma subunit	Cytoplasm	enzyme
-0.219	8.414	0.00353	1431340_a_at		BBIP1	BBSome interacting protein 1	Cytoplasm	other
-0.219	9.933	0.000778	1417182_at		DNAJA2	DnaJ (Hsp40) homolog, subfamily A, member 2	Nucleus	enzyme
-0.219	11.967	0.000248	1426283_at	D	NTM	neurotrimin	Plasma Membrane	other
-0.218	8.096	0.00343	1450921_at		APTX	aprataxin	Nucleus	phosphatase
-0.218	9.443	0.00103	1423966_at	D	CD99L2	CD99 molecule-like 2	Plasma Membrane	other
-0.218	10.844	0.000783	1450675_at		SMAP2	small ArfGAP2	Other	other
-0.217	7.918	0.000515	1430991_at		1810014B01Rik	RIKEN cDNA 1810014B01 gene	Other	other
-0.217	8.147	0.00306	1452394_at		CARS	cysteinyl-tRNA synthetase	Cytoplasm	enzyme
-0.217	9.32	0.000289	1421448_at		RALGAPA1	Ral GTPase activating protein, alpha subunit 1 (catalytic)	Cytoplasm	other
-0.216	10.733	0.00217	1431822_a_at		AZI2	5-azacytidine induced 2	Cytoplasm	other
-0.216	9.173	0.000273	1436431_at		C1orf21	chromosome 1 open reading frame 21	Other	other
-0.215	8.785	0.00303	1428523_at		LPHN3	latrophilin 3	Plasma Membrane	G-protein coupled receptor
-0.215	8.614	0.00352	1455614_at		TOMM40L	translocase of outer mitochondrial membrane 40 homolog (yeast)-like	Cytoplasm	other
-0.215	10.05	0.00102	1456535_at		VPS13C	vacuolar protein sorting 13 homolog C (S. cerevisiae)	Cytoplasm	other
-0.214	9.119	0.00146	1431951_a_at		USP16	ubiquitin specific peptidase 16	Cytoplasm	peptidase
-0.213	10.923	0.000475	1432344_a_at		APLP2	amyloid beta (A4) precursor-like protein 2	Cytoplasm	other
-0.213	10.793	0.00219	1424547_at		CA10	carbonic anhydrase X	Other	enzyme
-0.213	10.42	0.00269	1428605_at		CCDC124	coiled-coil domain containing 124	Other	other
-0.212	10.964	0.00258	1444026_at		C11orf87	chromosome 11 open reading frame 87	Other	other
-0.212	9.064	0.00115	1452079_s_at		DCUN1D1	DCN1, defective in cullin neddylation 1, domain containing 1	Nucleus	other
-0.21	9.593	0.00149	1418764_a_at		BPNT1	3'(2'), 5'-bisphosphate nucleotidase 1	Nucleus	phosphatase
-0.21	8.154	0.00337	1435189_at		FRMPD1	FERM and PDZ domain containing 1	Cytoplasm	other
-0.21	8.527	0.000405	1421504_at		SP4	Sp4 transcription factor	Nucleus	transcription regulator
-0.21	8.909	0.000764	1457293_at		ZBTB4	zinc finger and BTB domain containing 4	Nucleus	other
-0.209	9	0.000809	1435115_at		FNDC5	fibronectin type III domain containing 5	Other	other
-0.209	7.85	0.00147	1455768_at		NPC2	Niemann-Pick disease, type C2	Extracellular Space	other
-0.209	8.182	0.000454	1424362_at		PPAPDC3	phosphatidic acid phosphatase type 2 domain containing 3	Nucleus	phosphatase
-0.209	8.353	0.00336	1452629_at		SAFB2	scaffold attachment factor B2	Cytoplasm	other
-0.209	9.576	0.00163	1432750_at		ZNF711	zinc finger protein 711	Nucleus	other
-0.208	10.405	0.0037	1456500_at		APH1B	APH1B gamma secretase subunit	Other	peptidase
-0.208	8.532	0.00206	1416441_at		CPQ	carboxypeptidase Q	Extracellular Space	peptidase
-0.208	9.459	0.00333	1418456_a_at		CXCL14	chemokine (C-X-C motif) ligand 14	Extracellular Space	cytokine
-0.208	11.318	0.00125	1429064_at		DIP2C	DIP2 disco-interacting protein 2 homolog C (Drosophila)	Other	other
-0.208	7.838	0.00244	1425544_at		PLEKHA5	pleckstrin homology domain containing, family A member 5	Cytoplasm	other
-0.208	7.571	0.00363	1452112_a_at		RBM4B	RNA binding motif protein 4B	Nucleus	other
-0.208	8.13	0.00305	1424837_at		Rnf113a1	ring finger protein 113A1	Other	other
-0.207	8.576	0.00277	1436056_at		KIF13B	kinesin family member 13B	Cytoplasm	other
-0.207	8.335	0.00377	1416424_at		PLIN3	perilipin 3	Cytoplasm	other
-0.207	8.422	0.00308	1420816_at		YWHAG	tyrosine 3-monooxygenase/tryptophan 5-monooxygenase activation protein, gamma	Cytoplasm	other
-0.206	7.108	0.00345	1430328_at		POLR3F	polymerase (RNA) III (DNA directed) polypeptide F, 39 kDa	Nucleus	enzyme
-0.206	9.31	0.00106	1441087_at		Tunar	Tcl1 upstream neural differentiation associated RNA	Other	other
-0.205	10.027	0.0021	1420679_a_at		AIG1	androgen-induced 1	Other	other
-0.205	11.029	0.00272	1450731_s_at		TNFRSF21	tumor necrosis factor receptor superfamily, member 21	Plasma Membrane	transmembrane receptor
-0.204	9.463	0.00157	1449001_at		IVD	isovaleryl-CoA dehydrogenase	Cytoplasm	enzyme
-0.204	7.256	0.00295	1427414_at	D	PRKAR2A	protein kinase, cAMP-dependent, regulatory, type II, alpha	Cytoplasm	kinase
-0.204	9.579	0.00231	1426897_at		RCC2	regulator of chromosome condensation 2	Nucleus	other
-0.204	10.291	0.000928	1416882_at		RGS10	regulator of G-protein signaling 10	Cytoplasm	other
-0.203	10.156	0.00105	1433494_at		Dos	downstream of Stk11	Other	other
-0.203	9.668	0.00231	1432447_a_at		MEAF6	MYST/Esa1-associated factor 6	Nucleus	other
-0.202	10.123	0.00188	1418432_at		CAB39	calcium binding protein 39	Cytoplasm	enzyme
-0.202	8.592	0.00365	1417412_at		F8A1 (includes others)	coagulation factor VIII-associated 1	Nucleus	other
-0.202	10.568	0.00291	1439847_s_at		KLF12	Kruppel-like factor 12	Nucleus	transcription regulator
-0.202	10.328	0.0012	1433776_at		LHFP	lipoma HMGIC fusion partner	Other	other
-0.202	9.111	0.00332	1457024_x_at		Slc35a2	solute carrier family 35 (UDP-galactose transporter), member A2	Cytoplasm	transporter
-0.201	9.172	0.00112	1422710_a_at		CACNA1H	calcium channel, voltage-dependent, T type, alpha 1H subunit	Plasma Membrane	ion channel	cinnarizine, flunarizine, mibefradil, bepridil, zonisamide, isradipine
-0.201	7.528	0.00395	1436020_at		CHAMP1	chromosome alignment maintaining phosphoprotein 1	Nucleus	other
-0.201	10.65	0.000972	1435977_at		HDGFRP3	hepatoma-derived growth factor, related protein 3	Nucleus	other
-0.201	7.571	0.000438	1429437_at		PRPF40A	PRP40 pre-mRNA processing factor 40 homolog A (S. cerevisiae)	Nucleus	other
-0.2	8.927	0.00112	1423365_at		CACNA1G	calcium channel, voltage-dependent, T type, alpha 1G subunit	Plasma Membrane	ion channel	cinnarizine, trimethadione, flunarizine, ethosuximide, mibefradil, zonisamide
-0.2	10.834	0.00236	1435720_at		KCND3	potassium voltage-gated channel, Shal-related subfamily, member 3	Plasma Membrane	ion channel	dalfampridine
-0.2	9.452	0.00113	1456656_at		LIN7A	lin-7 homolog A (C. elegans)	Plasma Membrane	other
-0.2	11.487	0.00162	1430583_at		NRCAM	neuronal cell adhesion molecule	Plasma Membrane	other
-0.2	10.183	0.00243	1452686_s_at		TMEM222	transmembrane protein 222	Other	other
-0.2	9.387	0.00319	1425249_a_at		TYRO3	TYRO3 protein tyrosine kinase	Plasma Membrane	kinase
-0.2	11.22	0.000669	1423114_at		UBE2D3	ubiquitin-conjugating enzyme E2D 3	Cytoplasm	enzyme
-0.199	7.537	0.000528	1424546_at		C16orf91	chromosome 16 open reading frame 91	Other	other
-0.199	10.411	0.00248	1433906_at		CLVS1	clavesin 1	Cytoplasm	other
-0.199	10.636	0.00138	1424342_at		FYTTD1	forty-two-three domain containing 1	Nucleus	other
-0.199	9.986	0.00243	1422900_at		MGEA5	meningioma expressed antigen 5 (hyaluronidase)	Cytoplasm	enzyme
-0.199	5.421	0.0024	1442573_at		TRMT13	tRNA methyltransferase 13 homolog (S. cerevisiae)	Other	other
-0.198	9.232	0.00311	1460653_at		ATXN2	ataxin 2	Nucleus	other
-0.197	10.594	0.00119	1452958_at		ASPHD2	aspartate beta-hydroxylase domain containing 2	Other	enzyme
-0.197	9.795	0.00127	1434466_at	D	ATCAY	ataxia, cerebellar, Cayman type	Plasma Membrane	other
-0.196	8.261	0.00262	1443955_at		C1orf189	chromosome 1 open reading frame 189	Other	other
-0.196	10.447	0.00279	1430546_at	D	CRYZL1	crystallin, zeta (quinone reductase)-like 1	Cytoplasm	enzyme
-0.196	11.105	0.00298	1450080_at		FAM127A	family with sequence similarity 127, member A	Plasma Membrane	other
-0.196	10.485	0.00327	1451020_at		GSK3B	glycogen synthase kinase 3 beta	Nucleus	kinase	enzastaurin
-0.196	11.753	0.00132	1416482_at		TTC3	tetratricopeptide repeat domain 3	Cytoplasm	enzyme
-0.196	8.897	0.00276	1451192_a_at		TTC4	tetratricopeptide repeat domain 4	Other	other
-0.196	12.227	0.000587	1423106_at	D	UBE2B	ubiquitin-conjugating enzyme E2B	Cytoplasm	enzyme
-0.195	9.298	0.0024	1434750_at		EXOC3	exocyst complex component 3	Plasma Membrane	transporter
-0.195	9.347	0.0018	1431686_a_at		GMFB	glia maturation factor, beta	Cytoplasm	growth factor
-0.195	8.847	0.00222	1436238_at		LGI3	leucine-rich repeat LGI family, member 3	Extracellular Space	other
-0.195	11.677	0.00155	1450683_at		TAGLN3	transgelin 3	Extracellular Space	other
-0.194	11.555	0.00136	1427878_at		Cystm1	cysteine-rich transmembrane module containing 1	Cytoplasm	other
-0.194	8.684	0.00327	1451454_at		PCDH20	protocadherin 20	Other	other
-0.194	9.88	0.00128	1454044_a_at		PEX3	peroxisomal biogenesis factor 3	Cytoplasm	other
-0.194	9.493	0.00339	1434554_at		TRIM37	tripartite motif containing 37	Cytoplasm	enzyme
-0.193	10.089	0.00341	1450064_at	D	FMN2	formin 2	Cytoplasm	other
-0.193	10.823	0.00391	1420979_at		PAK1	p21 protein (Cdc42/Rac)-activated kinase 1	Cytoplasm	kinase
-0.193	9.809	0.00349	1436906_at		RNF166	ring finger protein 166	Other	other
-0.192	10.646	0.000848	1420985_at		ASH1L	ash1 (absent, small, or homeotic)-like (Drosophila)	Nucleus	transcription regulator
-0.192	8.752	0.00317	1418498_at		FGF13	fibroblast growth factor 13	Extracellular Space	growth factor
-0.192	5.547	0.00313	1444980_at		ONECUT2	one cut homeobox 2	Nucleus	transcription regulator
-0.191	9.931	0.000991	1454021_a_at		EXOSC10	exosome component 10	Nucleus	kinase
-0.191	10.373	0.00345	1449286_at		NTNG1	netrin G1	Extracellular Space	other
-0.191	7.938	0.000757	1430640_a_at		PRKAR2B	protein kinase, cAMP-dependent, regulatory, type II, beta	Cytoplasm	kinase
-0.191	7.901	0.00248	1453649_at		ZNF780A	zinc finger protein 780A	Other	other
-0.19	7.315	0.0011	1442742_at		ATP2C1	ATPase, Ca++ transporting, type 2C, member 1	Cytoplasm	transporter	sevoflurane, isoflurane, desflurane, enflurane, Ca2+
-0.19	8.446	0.00234	1449290_at		DPYSL5	dihydropyrimidinase-like 5	Cytoplasm	enzyme
-0.19	10.584	0.00276	1421280_at	D	GABRA1	gamma-aminobutyric acid (GABA) A receptor, alpha 1	Plasma Membrane	ion channel	methohexital, primidone, meprobamate, aspirin/butalbital/caffeine, aspirin/meprobamate, aspirin/butalbital/caffeine/codeine, hexobarbital, pagoclone, ethchlorvynol, alphadolone, SEP 174559, heptabarbital, zopiclone, glutethimide, clobazam, nitrazepam, phentermine/topiramate, caffeine/ethanol, adinazolam, butobarbital, acetaminophen/butalbital/caffeine, sevoflurane, isoflurane, gaboxadol, isoniazi…
-0.189	9.164	0.00221	1418079_at		PSME3	proteasome (prosome, macropain) activator subunit 3 (PA28 gamma; Ki)	Cytoplasm	peptidase
-0.189	9.835	0.00154	1435129_at		PTP4A2	protein tyrosine phosphatase type IVA, member 2	Cytoplasm	phosphatase
-0.189	10.801	0.00165	1454938_at		SNX13	sorting nexin 13	Cytoplasm	transporter
-0.188	9.619	0.00174	1434034_at		CERK	ceramide kinase	Plasma Membrane	kinase
-0.188	7.26	0.00205	1449443_at	D	DECR1	2,4-dienoyl CoA reductase 1, mitochondrial	Cytoplasm	enzyme
-0.188	8.935	0.00336	1456533_at		DPY19L1	dpy-19-like 1 (C. elegans)	Other	other
-0.188	7.404	0.00239	1452449_at		HMBOX1	homeobox containing 1	Nucleus	transcription regulator
-0.188	12.14	0.000482	1423810_at		PPME1	protein phosphatase methylesterase 1	Other	enzyme
-0.188	9.076	0.00241	1454871_at		RBM15B	RNA binding motif protein 15B	Nucleus	other
-0.187	11.375	0.00284	1450694_at		FKBP2	FK506 binding protein 2, 13kDa	Cytoplasm	enzyme
-0.187	8.889	0.00327	1433529_at		PAMR1	peptidase domain containing associated with muscle regeneration 1	Extracellular Space	peptidase
-0.187	10.881	0.00134	1460326_at		PIK3CA	phosphatidylinositol-4,5-bisphosphate 3-kinase, catalytic subunit alpha	Cytoplasm	kinase	SF 1126, PX-866, dactolisib, 2-(1H-indazol-4-yl)-6-(4-methanesulfonylpiperazin-1-ylmethyl)-4-morpholin-4-ylthieno(3,2-d)pyrimidine, buparlisib, XL147
-0.187	11.241	0.00178	1435464_at		SMIM14	small integral membrane protein 14	Cytoplasm	other
-0.186	8.731	0.00388	1422680_at		CTR9	CTR9, Paf1/RNA polymerase II complex component	Nucleus	other
-0.186	10.448	0.00291	1434668_at		NUCKS1	nuclear casein kinase and cyclin-dependent kinase substrate 1	Nucleus	kinase
-0.186	9.901	0.00388	1448584_at		RSRC1	arginine/serine-rich coiled-coil 1	Nucleus	other
-0.186	10.513	0.00177	1426617_a_at	D	TTYH1	tweety family member 1	Plasma Membrane	ion channel
-0.185	9.444	0.00192	1460433_at		ENTPD6	ectonucleoside triphosphate diphosphohydrolase 6 (putative)	Cytoplasm	enzyme
-0.185	11.043	0.000604	1420375_at	D	KIF3A	kinesin family member 3A	Cytoplasm	enzyme
-0.185	10.422	0.0019	1417060_at		PPP1R11	protein phosphatase 1, regulatory (inhibitor) subunit 11	Cytoplasm	other
-0.185	8.892	0.00234	1448674_at		RNF25	ring finger protein 25	Nucleus	transcription regulator
-0.184	11.074	0.0027	1422407_s_at		HRAS	Harvey rat sarcoma viral oncogene homolog	Plasma Membrane	enzyme
-0.184	7.549	0.00156	1421035_a_at		MAGI3	membrane associated guanylate kinase, WW and PDZ domain containing 3	Cytoplasm	kinase
-0.183	11.096	0.00364	1431826_a_at		BRSK2	BR serine/threonine kinase 2	Cytoplasm	kinase
-0.183	10.354	0.00109	1417923_at		PAK3	p21 protein (Cdc42/Rac)-activated kinase 3	Cytoplasm	kinase
-0.183	9.857	0.00153	1455845_at		WSCD1	WSC domain containing 1	Other	other
-0.182	11.688	0.00119	1450738_at		KIF21A	kinesin family member 21A	Cytoplasm	other
-0.182	8.323	0.00167	1420845_at		MRPS2	mitochondrial ribosomal protein S2	Cytoplasm	other
-0.181	8.79	0.00285	1424693_at		ERLEC1	endoplasmic reticulum lectin 1	Cytoplasm	other
-0.181	8.701	0.00176	1418032_at		ITFG2	integrin alpha FG-GAP repeat containing 2	Other	other
-0.181	10.81	0.00205	1422792_at	D	PAFAH1B2	platelet-activating factor acetylhydrolase 1b, catalytic subunit 2 (30kDa)	Cytoplasm	enzyme
-0.181	8.955	0.00359	1422959_s_at		RNF114	ring finger protein 114	Extracellular Space	other
-0.181	8.696	0.00246	1429634_at		ZNF580	zinc finger protein 580	Nucleus	other
-0.179	10.257	0.00192	1449634_a_at		ANKS1B	ankyrin repeat and sterile alpha motif domain containing 1B	Nucleus	other
-0.179	8.567	0.00306	1457045_at		GALNT13	polypeptide N-acetylgalactosaminyltransferase 13	Cytoplasm	enzyme
-0.179	13.758	0.00136	1426255_at		NEFL	neurofilament, light polypeptide	Cytoplasm	other
-0.179	10.574	0.00124	1428788_at		PGP	phosphoglycolate phosphatase	Other	enzyme
-0.178	10.409	0.00133	1424077_at		GDPD1	glycerophosphodiester phosphodiesterase domain containing 1	Other	enzyme
-0.178	8.439	0.00357	1421269_at		UGCG	UDP-glucose ceramide glucosyltransferase	Cytoplasm	enzyme	N-butyldeoxygalactonojirimycin, N-butyldeoxynojirimycin
-0.177	8.139	0.002	1417555_at		ATAD1	ATPase family, AAA domain containing 1	Other	enzyme
-0.177	8.667	0.00114	1419385_a_at		UBQLN1	ubiquilin 1	Cytoplasm	other
-0.176	7.702	0.00358	1434631_at		C4orf33	chromosome 4 open reading frame 33	Other	other
-0.176	11.15	0.00239	1424215_at		FUNDC1	FUN14 domain containing 1	Cytoplasm	other
-0.176	7.994	0.00321	1459021_at		RABEPK	Rab9 effector protein with kelch motifs	Cytoplasm	other
-0.176	10.186	0.00266	1448956_at		STARD10	StAR-related lipid transfer (START) domain containing 10	Cytoplasm	other
-0.176	12.495	0.00344	1423461_a_at		UBL3	ubiquitin-like 3	Cytoplasm	other
-0.175	8.39	0.00231	1416375_at		AP3M1	adaptor-related protein complex 3, mu 1 subunit	Cytoplasm	transporter
-0.175	10.599	0.00334	1420776_a_at		AUH	AU RNA binding protein/enoyl-CoA hydratase	Cytoplasm	enzyme
-0.175	8.551	0.00361	1447987_at		LETM2	leucine zipper-EF-hand containing transmembrane protein 2	Other	other
-0.174	8.492	0.00334	1449267_at		CHID1	chitinase domain containing 1	Extracellular Space	other
-0.174	10.952	0.00389	1454680_at		KIAA0232	KIAA0232	Extracellular Space	other
-0.174	8.323	0.00355	1433587_at		RGMB	repulsive guidance molecule family member b	Plasma Membrane	other
-0.174	10.256	0.00371	1427896_at		SUDS3	suppressor of defective silencing 3 homolog (S. cerevisiae)	Nucleus	other
-0.174	10.375	0.00368	1422883_at		USP8	ubiquitin specific peptidase 8	Cytoplasm	peptidase
-0.173	9.44	0.00317	1455328_at		ASIC1	acid-sensing (proton-gated) ion channel 1	Plasma Membrane	ion channel	amiloride, amiloride/hydrochlorothiazide
-0.172	10.612	0.00323	1426582_at		ATF2	activating transcription factor 2	Nucleus	transcription regulator
-0.171	9.057	0.00372	1416239_at		ASS1	argininosuccinate synthase 1	Cytoplasm	enzyme
-0.171	10.685	0.00328	1435847_at		CDC42BPA	CDC42 binding protein kinase alpha (DMPK-like)	Cytoplasm	kinase
-0.17	12.24	0.00344	1416149_at		OLIG1	oligodendrocyte transcription factor 1	Nucleus	transcription regulator
-0.17	8.704	0.0035	1434826_at		RFESD	Rieske (Fe-S) domain containing	Other	other
-0.169	12.427	0.00339	1417094_at		ACOT7	acyl-CoA thioesterase 7	Cytoplasm	enzyme
-0.169	9.31	0.00358	1448672_a_at		ARFGAP2	ADP-ribosylation factor GTPase activating protein 2	Nucleus	other
-0.169	9.714	0.00123	1419275_at		Dazap1	DAZ associated protein 1	Other	other
-0.169	9.209	0.00289	1452854_at		SEC63	SEC63 homolog (S. cerevisiae)	Cytoplasm	transporter
-0.168	10.098	0.00309	1419031_at		FADS2	fatty acid desaturase 2	Plasma Membrane	enzyme
-0.168	11.756	0.00191	1431403_a_at		MAP7D2	MAP7 domain containing 2	Other	other
-0.168	11.362	0.00355	1416588_at		PTPRN	protein tyrosine phosphatase, receptor type, N	Plasma Membrane	phosphatase
-0.167	9.429	0.00252	1435573_at		Otud5	OTU domain containing 5	Other	enzyme
-0.167	9.793	0.00377	1429554_at		SDCCAG3	serologically defined colon cancer antigen 3	Other	other
-0.166	10.08	0.00359	1434422_at		C2orf69	chromosome 2 open reading frame 69	Other	other
-0.166	9.866	0.00223	1450249_s_at		KIF5A	kinesin family member 5A	Cytoplasm	transporter
-0.166	10.643	0.00292	1440856_at		MAPK8	mitogen-activated protein kinase 8	Cytoplasm	kinase	aplidine
-0.166	8.613	0.0014	1417831_at		SMC1A	structural maintenance of chromosomes 1A	Nucleus	transporter
-0.163	9.419	0.00305	1424822_at		SLAIN1	SLAIN motif family, member 1	Other	other
-0.163	11.672	0.0029	1455377_at		TTLL7	tubulin tyrosine ligase-like family, member 7	Plasma Membrane	other
-0.162	12.013	0.00212	1416580_a_at		STUB1	STIP1 homology and U-box containing protein 1, E3 ubiquitin protein ligase	Cytoplasm	enzyme
-0.161	9.547	0.00275	1422522_at		FXR2	fragile X mental retardation, autosomal homolog 2	Cytoplasm	other
-0.161	9.822	0.00377	1448155_at	D	PDCD6IP	programmed cell death 6 interacting protein	Cytoplasm	other
-0.161	10.542	0.00189	1422581_at		PIAS1	protein inhibitor of activated STAT, 1	Nucleus	transcription regulator
-0.159	12.13	0.00321	1424308_at		SLC24A3	solute carrier family 24 (sodium/potassium/calcium exchanger), member 3	Plasma Membrane	transporter
-0.159	11.361	0.00234	1416098_at		SYNGR3	synaptogyrin 3	Plasma Membrane	other
-0.157	11.531	0.00327	1452877_at		C4orf27	chromosome 4 open reading frame 27	Nucleus	other
-0.157	10.826	0.0038	1450932_s_at		DOCK9	dedicator of cytokinesis 9	Cytoplasm	other
-0.157	9.26	0.00329	1449270_at		PLXDC2	plexin domain containing 2	Extracellular Space	other
-0.155	9.994	0.00264	1455215_at		PIANP	PILR alpha associated neural protein	Other	other
-0.151	12.08	0.00339	1422568_at		NDEL1	nudE neurodevelopment protein 1-like 1	Nucleus	other
-0.15	10.997	0.00372	1435505_at		DMWD	dystrophia myotonica, WD repeat containing	Nucleus	other
-0.147	11.364	0.00307	1443558_s_at		NT5DC3	5'-nucleotidase domain containing 3	Other	other
-0.143	8.861	0.00314	1428427_at		FBXL2	F-box and leucine-rich repeat protein 2	Cytoplasm	enzyme
-0.139	12.584	0.00382	1424015_at		DENND5A	DENN/MADD domain containing 5A	Cytoplasm	other
2.491	6.947	6.99e-08	1421811_at
1.851	7.238	5.27e-08	1428909_at
1.002	6.979	1.22e-05	1433935_at
0.746	6.916	0.00228	1444749_at
0.644	7.023	3.83e-06	1435144_at
0.611	4.606	0.000726	1452348_s_at
0.598	7.183	0.00214	1452426_x_at
0.463	7.706	0.00292	1444531_at
0.367	6.639	0.00283	1446382_at
0.328	8.432	0.0029	1444199_at
0.324	4.709	0.00127	1457063_at
0.316	7.093	0.00136	1430338_at
0.313	7.838	0.0007	1453044_at
0.294	9.418	0.000106	1436546_at
0.276	8.764	0.00212	1440084_at
0.254	9.554	0.000144	1435598_at
0.25	5.453	0.00085	1457596_at
0.243	12.788	0.000657	AFFX-r2-Ec-bioD-3_at
0.226	7.965	0.00131	1436441_at
0.225	10.028	0.000384	AFFX-r2-Ec-bioC-5_at
0.212	6.954	0.00232	1442725_at
0.207	12.229	0.00389	AFFX-BioDn-3_at
0.202	10.197	0.00303	AFFX-r2-Ec-bioC-3_at
0.199	12.226	0.00137	AFFX-r2-Ec-bioD-5_at
0.197	8.519	0.000975	1460070_at
0.18	6.117	0.00319	1447484_x_at
-0.178	9.503	0.0036	1443205_at
-0.193	8.861	0.00162	1435845_at
-0.209	6.554	0.00124	1436092_at
-0.231	6.858	0.00234	1445315_at
-0.233	8.691	0.000561	1441298_at
-0.234	6.19	0.00329	1439614_at
-0.235	9.919	0.000941	1450026_a_at
-0.237	9.441	0.000733	1440056_at
-0.272	8.695	0.00134	1444510_at
-0.278	8.373	0.000437	1455329_at
-0.285	7.457	0.00165	1438326_at
-0.289	7.621	0.000269	1429202_at
-0.295	8.32	0.000689	1430245_at
-0.3	8.193	0.000249	1444307_at
-0.3	9.643	0.00114	1447057_at
-0.303	7.065	0.00179	1443147_at
-0.305	10.363	0.000111	1455690_at
-0.314	7.743	0.000172	1439734_at
-0.321	7.471	0.00159	1457141_at
-0.344	5.888	0.00253	1459670_at
-0.346	6.748	0.00188	1447723_at
-0.359	5.619	0.00132	1445061_at
-0.364	11.308	0.000371	1445539_at
-0.377	7.832	0.00259	1453807_at
-0.389	8.29	6.37e-05	1436412_at
-0.407	10.512	0.003	1436246_at
-0.421	6.903	0.000749	1442641_at
-0.422	8.18	4.46e-05	1459325_at
-0.432	6.361	0.000373	1435629_at
-0.473	11.282	0.000172	1441065_at
-0.541	7.902	1.5e-05	1434632_at
-0.541	7.968	0.000231	1445676_at
-0.567	7.3	0.00209	1458711_at
-0.573	7.797	0.000886	1441790_at
-0.594	9.085	1.48e-06	1455298_at
-0.643	8.249	0.00147	1438057_at

## Sheet: F5dFBS
Log Ratio	Intensity/RPKM/FPKM	p-value	ID	Notes	Symbol	Entrez Gene Name	Location	Type(s)	Drug(s)
3.642	9.326	8.67e-08	1423547_at	D	LYZ	lysozyme	Extracellular Space	enzyme
3.426	8.3	6.56e-14	1448239_at		HMOX1	heme oxygenase (decycling) 1	Cytoplasm	enzyme	tin mesoporphyrin
3.417	10.499	9.88e-10	1449254_at		SPP1	secreted phosphoprotein 1	Extracellular Space	cytokine
2.939	7.239	7.74e-08	1442082_at	D	C3AR1	complement component 3a receptor 1	Plasma Membrane	G-protein coupled receptor
2.731	7.86	1.75e-09	1422476_at		IFI30	interferon, gamma-inducible protein 30	Cytoplasm	enzyme
2.685	8.977	1.63e-09	1449164_at		CD68	CD68 molecule	Plasma Membrane	other
2.647	6.628	6.48e-11	1419599_s_at		MS4A6A	membrane-spanning 4-domains, subfamily A, member 6A	Other	other
2.579	9.909	1.01e-11	1456292_a_at	D	VIM	vimentin	Cytoplasm	other
2.567	6.628	6.33e-08	1419004_s_at		BCL2A1	BCL2-related protein A1	Cytoplasm	other
2.442	10.117	1.35e-08	1427076_at		MPEG1	macrophage expressed 1	Cytoplasm	other
2.421	9.667	3.67e-10	1440142_s_at	D	GFAP	glial fibrillary acidic protein	Cytoplasm	other
2.331	8.251	2.19e-07	1460218_at		Cd52	CD52 antigen	Other	other
2.146	8.414	5.87e-05	1418580_at		RTP4	receptor (chemosensory) transporter protein 4	Plasma Membrane	other
2.136	8.838	1.64e-06	1448380_at		LGALS3BP	lectin, galactoside-binding, soluble, 3 binding protein	Plasma Membrane	transmembrane receptor
2.134	8.181	0.000603	1450783_at		IFIT1B	interferon-induced protein with tetratricopeptide repeats 1B	Cytoplasm	other
2.117	8.01	1.23e-08	1450678_at		ITGB2	integrin, beta 2 (complement component 3 receptor 3 and 4 subunit)	Plasma Membrane	transmembrane receptor
2.063	8.275	3.82e-12	1435477_s_at	D	FCGR2B	Fc fragment of IgG, low affinity IIb, receptor (CD32)	Plasma Membrane	transmembrane receptor	IgG
2.057	6.788	0.00152	1418191_at		USP18	ubiquitin specific peptidase 18	Cytoplasm	peptidase
2.048	7.391	0.000971	1419043_a_at	D	Iigp1	interferon inducible GTPase 1	Other	enzyme
2.044	7.118	2e-07	1434437_x_at	D	RRM2	ribonucleotide reductase M2	Nucleus	enzyme	cytarabine/fludarabine phosphate, bortezomib/cladribine/rituximab, gemcitabine/paclitaxel, cyclophosphamide/fludarabine phosphate/rituximab, cladribine/cytarabine/daunorubicin, gemcitabine/oxaliplatin, gemcitabine/vinorelbine, docetaxel/gemcitabine, docetaxel/gemcitabine/vincristine, cladribine/cytarabine/filgrastim, capecitabine/gemcitabine, gemcitabine/oxaliplatin/paclitaxel, cytarabine/filgras…
2.034	8.574	2.76e-07	1434719_at		A2M	alpha-2-macroglobulin	Extracellular Space	transporter
1.971	7.946	5.59e-07	1415983_at		LCP1	lymphocyte cytosolic protein 1 (L-plastin)	Cytoplasm	other
1.968	8.551	0.000504	1449025_at		IFIT3	interferon-induced protein with tetratricopeptide repeats 3	Cytoplasm	other
1.961	9.58	7.05e-09	1437726_x_at	D	C1QB	complement component 1, q subcomponent, B chain	Extracellular Space	other
1.961	9.259	9.83e-07	1416382_at		CTSC	cathepsin C	Cytoplasm	peptidase
1.961	7.997	1.43e-09	1454268_a_at		CYBA	cytochrome b-245, alpha polypeptide	Cytoplasm	enzyme
1.957	9.414	5.59e-10	1421375_a_at		S100A6	S100 calcium binding protein A6	Cytoplasm	transporter
1.952	7.611	4.04e-09	1418826_at		Ms4a6b	membrane-spanning 4-domains, subfamily A, member 6B	Other	other
1.948	9.548	3.58e-10	1418021_at		C4A/C4B	complement component 4B (Chido blood group)	Extracellular Space	other	IgG
1.939	10.292	1.59e-08	1449401_at		C1QC	complement component 1, q subcomponent, C chain	Extracellular Space	other
1.936	7.378	3.21e-09	1423760_at	D	CD44	CD44 molecule (Indian blood group)	Plasma Membrane	enzyme
1.936	9.469	1.24e-08	1426260_a_at	D	UGT1A6	UDP glucuronosyltransferase 1 family, polypeptide A6	Cytoplasm	enzyme
1.932	7.34	0.000761	1451860_a_at		Trim30a/Trim30d	tripartite motif-containing 30A	Cytoplasm	other
1.926	10.599	4.31e-08	1450792_at		TYROBP	TYRO protein tyrosine kinase binding protein	Plasma Membrane	transmembrane receptor
1.901	7.597	0.000516	1435906_x_at		GBP2	guanylate binding protein 2, interferon-inducible	Cytoplasm	enzyme
1.883	8.141	1.64e-06	1422124_a_at		PTPRC	protein tyrosine phosphatase, receptor type, C	Plasma Membrane	phosphatase
1.877	7.844	8.44e-06	1419282_at		CCL2	chemokine (C-C motif) ligand 2	Extracellular Space	cytokine	mimosine
1.877	7.69	4.21e-10	1417266_at		Ccl6	chemokine (C-C motif) ligand 6	Extracellular Space	cytokine
1.833	7.837	2.1e-09	1456250_x_at	D	TGFBI	transforming growth factor, beta-induced, 68kDa	Extracellular Space	other
1.805	10.071	2.15e-07	1418340_at		FCER1G	Fc fragment of IgE, high affinity I, receptor for; gamma polypeptide	Plasma Membrane	transmembrane receptor
1.801	10.994	4.32e-09	1417381_at		C1QA	complement component 1, q subcomponent, A chain	Extracellular Space	other
1.801	10.453	9.94e-06	1423754_at		IFITM3	interferon induced transmembrane protein 3	Plasma Membrane	other
1.799	10.173	2.7e-09	1448148_at	D	GRN	granulin	Extracellular Space	growth factor
1.792	8.25	4.1e-09	1448124_at	D	GUSB	glucuronidase, beta	Cytoplasm	enzyme
1.792	7.391	9.15e-08	1438948_x_at		TSPO	translocator protein (18kDa)	Cytoplasm	transmembrane receptor	CGS-8216, fluoxetine/olanzapine, estazolam, clorazepate, eszopiclone, temazepam, zolpidem, chlordiazepoxide, lorazepam, olanzapine, triazolam, flumazenil, clonazepam, flurazepam, midazolam, flunitrazepam, alprazolam, zaleplon, SSR180575, PK 11195
1.787	10.785	2.64e-06	1422903_at		LY86	lymphocyte antigen 86	Plasma Membrane	other
1.751	9.726	1.73e-07	1419573_a_at	D	LGALS1	lectin, galactoside-binding, soluble, 1	Extracellular Space	other
1.73	7.073	3.93e-05	1452352_at		Ctla2a/Ctla2b	cytotoxic T lymphocyte-associated protein 2 alpha	Plasma Membrane	other
1.708	9.517	1.66e-08	1448617_at		CD53	CD53 molecule	Plasma Membrane	other
1.707	6.691	9.82e-07	1422875_at		CD84	CD84 molecule	Plasma Membrane	other
1.667	9.275	6.6e-07	1418365_at	D	CTSH	cathepsin H	Cytoplasm	peptidase
1.654	8.169	6.68e-06	1417346_at		PYCARD	PYD and CARD domain containing	Cytoplasm	transcription regulator
1.646	9.128	1.04e-08	1417869_s_at	D	CTSZ	cathepsin Z	Cytoplasm	peptidase
1.622	7.889	0.00584	1427883_a_at		COL3A1	collagen, type III, alpha 1	Extracellular Space	other	collagenase clostridium histolyticum
1.613	7.628	6.8e-09	1450234_at		Ms4a6c	membrane-spanning 4-domains, subfamily A, member 6C	Other	other
1.593	6.43	5.29e-05	1421009_at		RSAD2	radical S-adenosyl methionine domain containing 2	Cytoplasm	enzyme
1.565	7.862	3.43e-08	1456014_s_at		FERMT3	fermitin family member 3	Cytoplasm	enzyme
1.555	9.034	5.78e-08	1448620_at		FCGR2A	Fc fragment of IgG, low affinity IIa, receptor (CD32)	Plasma Membrane	transmembrane receptor	IgG
1.554	6.449	2.7e-05	1416527_at		RAB32	RAB32, member RAS oncogene family	Cytoplasm	other
1.549	7.283	2.05e-06	1451683_x_at	D	HLA-A	major histocompatibility complex, class I, A	Plasma Membrane	other
1.547	8.891	8.85e-06	1451161_a_at		EMR1	egf-like module containing, mucin-like, hormone receptor-like 1	Plasma Membrane	G-protein coupled receptor
1.545	8.85	2.74e-08	1460351_at		LOC102637129/S100a11	S100 calcium binding protein A11 (calgizzarin)	Cytoplasm	other
1.544	6.501	8.14e-08	1419132_at		TLR2	toll-like receptor 2	Plasma Membrane	transmembrane receptor
1.54	7.83	8.61e-06	1421217_a_at		LGALS9B	lectin, galactoside-binding, soluble, 9B	Other	other
1.525	11.504	8.29e-09	1418364_a_at	D	FTL	ferritin, light polypeptide	Cytoplasm	enzyme
1.47	7.75	2.82e-07	1450199_a_at		STAB1	stabilin 1	Plasma Membrane	transporter
1.464	7.95	1.3e-09	1448929_at		F13A1	coagulation factor XIII, A1 polypeptide	Extracellular Space	enzyme
1.454	6.853	0.000272	1422046_at		ITGAM	integrin, alpha M (complement component 3 receptor 3 subunit)	Plasma Membrane	transmembrane receptor
1.444	12.207	1.01e-08	1448591_at		CTSS	cathepsin S	Cytoplasm	peptidase
1.438	8.347	3.6e-05	1418204_s_at		AIF1	allograft inflammatory factor 1	Nucleus	other
1.428	7.556	2.83e-06	1448749_at	D	PLEK	pleckstrin	Cytoplasm	other
1.396	7.293	9.94e-06	1416714_at		IRF8	interferon regulatory factor 8	Nucleus	transcription regulator
1.39	9.438	3.14e-08	1436905_x_at	D	LAPTM5	lysosomal protein transmembrane 5	Plasma Membrane	other
1.387	11.158	1.84e-09	1421840_at	D	ABCA1	ATP-binding cassette, sub-family A (ABC1), member 1	Plasma Membrane	transporter	probucol
1.381	6.961	6.21e-07	1424927_at	D	GLIPR1	GLI pathogenesis-related 1	Extracellular Space	other
1.377	7.804	3.54e-06	1448995_at		PF4	platelet factor 4	Extracellular Space	cytokine
1.367	7.587	4.6e-05	1418674_at		OSMR	oncostatin M receptor	Plasma Membrane	transmembrane receptor
1.36	8.017	0.00501	1450033_a_at	D	STAT1	signal transducer and activator of transcription 1, 91kDa	Nucleus	transcription regulator
1.357	9.085	6.23e-05	1418825_at		Irgm1	immunity-related GTPase family M member 1	Cytoplasm	other
1.342	8.846	0.00151	1444564_at	D	APOD	apolipoprotein D	Extracellular Space	transporter
1.327	8.132	2.55e-10	1436332_at		HSPB6	heat shock protein, alpha-crystallin-related, B6	Cytoplasm	other
1.321	8.839	6.28e-09	1452016_at		ALOX5AP	arachidonate 5-lipoxygenase-activating protein	Plasma Membrane	other
1.32	7.827	0.000238	1417876_at		FCGR1A	Fc fragment of IgG, high affinity Ia, receptor (CD64)	Plasma Membrane	transmembrane receptor	IgG
1.318	6.807	0.000203	1448627_s_at		PBK	PDZ binding kinase	Cytoplasm	kinase
1.313	12.119	1.03e-08	1448118_a_at		CTSD	cathepsin D	Cytoplasm	peptidase
1.31	8.788	0.00135	1418392_a_at		GBP4	guanylate binding protein 4	Cytoplasm	enzyme
1.303	7.292	1.01e-05	1418483_a_at		Ggta1	glycoprotein galactosyltransferase alpha 1, 3	Cytoplasm	other
1.301	7.518	8.16e-05	1450967_at		PTPLAD2	protein tyrosine phosphatase-like A domain containing 2	Other	other
1.283	7.51	0.00118	1422005_at		EIF2AK2	eukaryotic translation initiation factor 2-alpha kinase 2	Cytoplasm	kinase
1.283	8.278	0.00158	1434380_at	D	GBP7	guanylate binding protein 7	Cytoplasm	enzyme
1.281	6.682	9.36e-10	1460302_at	D	THBS1	thrombospondin 1	Extracellular Space	other
1.275	10.092	0.000751	1448891_at		Fcrls	Fc receptor-like S, scavenger receptor	Plasma Membrane	other
1.275	7.608	1.62e-06	1424265_at		NPL	N-acetylneuraminate pyruvate lyase (dihydrodipicolinate synthase)	Other	enzyme
1.267	7.685	1.13e-08	1420361_at		SLC11A1	solute carrier family 11 (proton-coupled divalent metal ion transporter), member 1	Plasma Membrane	transporter
1.263	7.233	9.94e-05	1416897_at		PARP9	poly (ADP-ribose) polymerase family, member 9	Nucleus	enzyme
1.262	6.846	7.02e-05	1449455_at		HCK	hemopoietic cell kinase	Cytoplasm	kinase	bosutinib
1.259	7.687	1.77e-08	1451969_s_at	D	PARP3	poly (ADP-ribose) polymerase family, member 3	Nucleus	enzyme
1.254	11.502	3.31e-07	1460180_at	D	HEXB	hexosaminidase B (beta polypeptide)	Cytoplasm	enzyme
1.251	7.261	0.00413	1455899_x_at		SOCS3	suppressor of cytokine signaling 3	Cytoplasm	phosphatase
1.241	7.184	7.74e-07	1417104_at		EMP3	epithelial membrane protein 3	Plasma Membrane	other
1.238	9.238	1.61e-06	1416226_at		ARPC1B	actin related protein 2/3 complex, subunit 1B, 41kDa	Cytoplasm	other
1.232	7.323	6.12e-06	1433842_at	D	LRRFIP1	leucine rich repeat (in FLII) interacting protein 1	Cytoplasm	other
1.205	8.681	0.00192	1455500_at		RNF213	ring finger protein 213	Cytoplasm	enzyme
1.195	9.475	8.58e-05	1448475_at		OLFML3	olfactomedin-like 3	Extracellular Space	other
1.183	8.488	2.47e-05	1456772_at		NCF1	neutrophil cytosolic factor 1	Cytoplasm	enzyme
1.174	7.159	1.12e-05	1417777_at		PTGR1	prostaglandin reductase 1	Cytoplasm	enzyme
1.171	6.813	0.000214	1429524_at		MYO1F	myosin IF	Cytoplasm	other
1.165	8.097	0.0024	1445897_s_at	D	IFI35	interferon-induced protein 35	Nucleus	other
1.16	9.366	4.92e-05	1438658_a_at		S1PR3	sphingosine-1-phosphate receptor 3	Plasma Membrane	G-protein coupled receptor	fingolimod
1.151	6.475	1.32e-06	1417620_at		RAC2	ras-related C3 botulinum toxin substrate 2 (rho family, small GTP binding protein Rac2)	Cytoplasm	enzyme
1.15	8.775	0.00235	1417141_at		Igtp	interferon gamma induced GTPase	Cytoplasm	enzyme
1.15	7.8	0.00036	1421322_a_at		IRF9	interferon regulatory factor 9	Nucleus	transcription regulator
1.146	6.83	2.46e-06	1450379_at	D	MSN	moesin	Plasma Membrane	other
1.145	5.993	0.000134	1438676_at		GBP6	guanylate binding protein family, member 6	Cytoplasm	enzyme
1.139	7.239	2.71e-07	1448613_at		ECM1	extracellular matrix protein 1	Extracellular Space	transporter
1.13	6.046	2.06e-06	1438855_x_at		TNFAIP2	tumor necrosis factor, alpha-induced protein 2	Extracellular Space	other
1.119	9.087	0.00378	1443698_at		XAF1	XIAP associated factor 1	Nucleus	other
1.112	6.984	6.09e-05	1448640_at	D	SLC14A1	solute carrier family 14 (urea transporter), member 1 (Kidd blood group)	Plasma Membrane	transporter
1.096	7.79	5.08e-05	1425974_a_at	D	TRIM25	tripartite motif containing 25	Cytoplasm	transcription regulator
1.084	11.902	3.65e-05	1452428_a_at	D	B2M	beta-2-microglobulin	Plasma Membrane	transmembrane receptor
1.082	10.844	3.56e-09	1448883_at		LGMN	legumain	Cytoplasm	peptidase
1.073	8.768	1.98e-05	1417695_a_at	D	SOAT1	sterol O-acyltransferase 1	Cytoplasm	enzyme	pactimibe, ezetimibe/fluvastatin, atorvastatin/ezetimibe, ezetimibe/rosuvastatin, ezetimibe/fenofibrate, ezetimibe/simvastatin, ezetimibe, hesperetin
1.064	10.735	5.43e-07	1416066_at		CD9	CD9 molecule	Plasma Membrane	other
1.053	10.444	2.6e-08	1417426_at		Srgn	serglycin	Cytoplasm	other
1.041	9.255	0.000132	1448982_at		KLK6	kallikrein-related peptidase 6	Extracellular Space	peptidase
1.04	8.117	2.47e-05	1419905_s_at		HPGD	hydroxyprostaglandin dehydrogenase 15-(NAD)	Cytoplasm	enzyme
1.038	8.166	1.98e-05	1416656_at		CLIC1	chloride intracellular channel 1	Nucleus	ion channel
1.034	8.795	7.16e-07	1424783_a_at		UGT1A9 (includes others)	UDP glucuronosyltransferase 1 family, polypeptide A8	Cytoplasm	enzyme
1.03	8.396	0.00231	1423233_at		CEBPD	CCAAT/enhancer binding protein (C/EBP), delta	Nucleus	transcription regulator
1.025	7.154	1.57e-06	1444040_at	D	LAIR1	leukocyte-associated immunoglobulin-like receptor 1	Plasma Membrane	transmembrane receptor
1.016	7.642	9.15e-06	1417936_at		Ccl9	chemokine (C-C motif) ligand 9	Extracellular Space	cytokine
1.014	9.247	6.11e-08	1451716_at		MAFB	v-maf avian musculoaponeurotic fibrosarcoma oncogene homolog B	Nucleus	other
1.013	8.161	0.000466	1451537_at		CHI3L1	chitinase 3-like 1 (cartilage glycoprotein-39)	Extracellular Space	enzyme
1.011	8.524	0.000558	1426774_at		PARP12	poly (ADP-ribose) polymerase family, member 12	Nucleus	other
1.009	8.614	0.000105	1418293_at		IFIT2	interferon-induced protein with tetratricopeptide repeats 2	Cytoplasm	other
1	10.787	2.12e-09	1415677_at		DHRS1	dehydrogenase/reductase (SDR family) member 1	Cytoplasm	enzyme
0.998	7.944	0.00612	1435606_at		GPC2	glypican 2	Plasma Membrane	other
0.993	9.604	4.14e-07	1423909_at	D	TMEM176A	transmembrane protein 176A	Other	other
0.992	7.766	0.00372	1424857_a_at		TRIM6-TRIM34	TRIM6-TRIM34 readthrough	Other	other
0.981	7.802	3.84e-07	1423693_at		CELA1	chymotrypsin-like elastase family, member 1	Extracellular Space	peptidase
0.97	7.592	1.39e-05	1438937_x_at	D	ANG	angiogenin, ribonuclease, RNase A family, 5	Extracellular Space	enzyme
0.968	9.278	0.000802	1438009_at		HIST1H2AC	histone cluster 1, H2ac	Nucleus	other
0.965	10.986	4.65e-06	1419873_s_at	D	CSF1R	colony stimulating factor 1 receptor	Plasma Membrane	kinase	nilotinib, sunitinib, pazopanib
0.948	9.565	1.24e-05	1419309_at		PDPN	podoplanin	Plasma Membrane	other
0.941	7.929	2.86e-05	1427040_at		MDFIC	MyoD family inhibitor domain containing	Nucleus	other
0.94	7.848	1.25e-06	1421223_a_at		ANXA4	annexin A4	Plasma Membrane	other
0.936	7.35	1.13e-05	1417457_at	D	CKS2	CDC28 protein kinase regulatory subunit 2	Other	kinase
0.935	6.724	0.000229	1420028_s_at		MCM3	minichromosome maintenance complex component 3	Nucleus	enzyme
0.933	6.971	2.99e-05	1438852_x_at	D	MCM6	minichromosome maintenance complex component 6	Nucleus	enzyme
0.928	11.892	2.34e-09	1451310_a_at		CTSV	cathepsin V	Cytoplasm	peptidase
0.921	8.08	9.06e-06	1451318_a_at		LYN	v-yes-1 Yamaguchi sarcoma viral related oncogene homolog	Cytoplasm	kinase	bosutinib
0.92	5.318	0.00146	1452242_at		CEP55	centrosomal protein 55kDa	Cytoplasm	other
0.919	7.16	4.15e-05	1424552_at		CASP8	caspase 8, apoptosis-related cysteine peptidase	Nucleus	peptidase
0.916	9.185	0.000103	1437277_x_at	D	TGM2	transglutaminase 2	Cytoplasm	enzyme
0.912	9.964	8.67e-05	1452956_a_at		Ifi27	interferon, alpha-inducible protein 27	Cytoplasm	other
0.911	7.639	1.03e-05	1422612_at		HK2	hexokinase 2	Cytoplasm	kinase
0.911	9.633	0.000499	1416630_at		ID3	inhibitor of DNA binding 3, dominant negative helix-loop-helix protein	Nucleus	transcription regulator
0.911	8.648	3.2e-06	1448276_at		TSPAN4	tetraspanin 4	Plasma Membrane	other
0.91	8.821	7.57e-08	1416698_a_at		CKS1B	CDC28 protein kinase regulatory subunit 1B	Other	kinase
0.909	8.592	6.53e-05	1420498_a_at	D	DAB2	Dab, mitogen-responsive phosphoprotein, homolog 2 (Drosophila)	Plasma Membrane	other
0.904	8.247	0.000322	1419455_at		IL10RB	interleukin 10 receptor, beta	Plasma Membrane	transmembrane receptor
0.902	7.546	1.62e-05	1431056_a_at	D	LPL	lipoprotein lipase	Cytoplasm	enzyme	atorvastatin/niacin, nicotinic acid/pioglitazone, nicotinic acid, tyloxapol, lovastatin/niacin
0.896	7.801	6.97e-07	1428018_a_at		CD300C	CD300c molecule	Plasma Membrane	transmembrane receptor
0.896	9.228	2.54e-05	1426397_at		TGFBR2	transforming growth factor, beta receptor II (70/80kDa)	Plasma Membrane	kinase
0.891	9.585	1.5e-05	1417533_a_at	D	ITGB5	integrin, beta 5	Plasma Membrane	other	cilengitide
0.884	9.975	5.32e-05	1415947_at	D	CREG1	cellular repressor of E1A-stimulated genes 1	Nucleus	transcription regulator
0.884	9.028	0.00159	1417061_at		SLC40A1	solute carrier family 40 (iron-regulated transporter), member 1	Plasma Membrane	transporter
0.873	8.283	0.000254	1428786_at		NCKAP1L	NCK-associated protein 1-like	Plasma Membrane	other
0.872	10.205	2.8e-07	1415897_a_at		MGST1	microsomal glutathione S-transferase 1	Cytoplasm	enzyme
0.867	8.958	2.49e-05	1419091_a_at		ANXA2	annexin A2	Plasma Membrane	other
0.867	6.407	8.76e-05	1460431_at		GCNT1	glucosaminyl (N-acetyl) transferase 1, core 2	Cytoplasm	enzyme
0.859	6.994	4.88e-07	1418099_at		TNFRSF1B	tumor necrosis factor receptor superfamily, member 1B	Plasma Membrane	transmembrane receptor
0.858	9.54	3.58e-06	1426454_at		ARHGDIB	Rho GDP dissociation inhibitor (GDI) beta	Cytoplasm	other
0.858	10.662	1.42e-08	1416344_at	D	LAMP2	lysosomal-associated membrane protein 2	Plasma Membrane	enzyme
0.856	6.318	6.8e-06	1427994_at		CD300LF	CD300 molecule-like family member f	Plasma Membrane	other
0.849	6.113	0.00188	1433512_at		FLI1	Fli-1 proto-oncogene, ETS transcription factor	Nucleus	transcription regulator
0.846	8.714	2.69e-05	1417460_at		IFITM2	interferon induced transmembrane protein 2	Other	other
0.841	7.884	0.000278	1436183_at		ZC3HAV1	zinc finger CCCH-type, antiviral 1	Plasma Membrane	other
0.84	8.647	0.00153	1460330_at		ANXA3	annexin A3	Cytoplasm	enzyme
0.838	10.534	4.23e-05	1421374_a_at		FXYD1	FXYD domain containing ion transport regulator 1	Plasma Membrane	ion channel
0.838	8.372	0.000538	1435342_at		KCNK6	potassium channel, subfamily K, member 6	Plasma Membrane	ion channel
0.838	9.652	3.33e-07	1422603_at		RNASE4	ribonuclease, RNase A family, 4	Extracellular Space	enzyme
0.837	7.912	1.8e-06	1418110_a_at		INPP5D	inositol polyphosphate-5-phosphatase, 145kDa	Cytoplasm	phosphatase
0.836	7.88	0.00218	1426276_at		IFIH1	interferon induced with helicase C domain 1	Nucleus	enzyme
0.834	7.258	1.32e-05	1435386_at		VWF	von Willebrand factor	Extracellular Space	other	F8
0.83	6.219	0.000559	1419519_at		IGF1	insulin-like growth factor 1 (somatomedin C)	Extracellular Space	growth factor
0.829	8.329	6.95e-07	1416625_at		SERPING1	serpin peptidase inhibitor, clade G (C1 inhibitor), member 1	Extracellular Space	other
0.825	7.154	0.00401	1422437_at		COL5A2	collagen, type V, alpha 2	Extracellular Space	other	collagenase clostridium histolyticum
0.812	10.555	4.1e-09	1416340_a_at		MAN2B1	mannosidase, alpha, class 2B, member 1	Cytoplasm	enzyme
0.81	6.785	1.37e-06	1448894_at		AKR1B10	aldo-keto reductase family 1, member B10 (aldose reductase)	Cytoplasm	enzyme
0.809	8.549	5.36e-06	1418982_at		CEBPA	CCAAT/enhancer binding protein (C/EBP), alpha	Nucleus	transcription regulator
0.809	7.351	5.54e-07	1418396_at		GPSM3	G-protein signaling modulator 3	Cytoplasm	other
0.803	6.881	4.04e-05	1448232_x_at		TUBA1C	tubulin, alpha 1c	Cytoplasm	other	epothilone B, colchicine/probenecid, larotaxel, eribulin, davunetide, vintafolide, milataxel, cevipabulin, gemcitabine/paclitaxel, docetaxel/prednisone, capecitabine/docetaxel, paclitaxel/trastuzumab, cyclophosphamide/prednisone/vincristine, docetaxel/hydrocortisone, cyclophosphamide/docetaxel, gemcitabine/vinorelbine, cyclophosphamide/daunorubicin/imatinib/prednisone/vincristine, cyclophosphamid…
0.802	7.776	2.32e-07	1426246_at		PROS1	protein S (alpha)	Extracellular Space	other
0.801	5.718	8.1e-05	1419631_at		WAS	Wiskott-Aldrich syndrome	Cytoplasm	other
0.796	9.496	0.000182	1449106_at		GPX3	glutathione peroxidase 3 (plasma)	Extracellular Space	enzyme
0.792	9.298	0.000441	1450872_s_at	D	LIPA	lipase A, lysosomal acid, cholesterol esterase	Cytoplasm	enzyme
0.791	11.092	4.66e-08	1420502_at		SAT1	spermidine/spermine N1-acetyltransferase 1	Cytoplasm	enzyme
0.788	6.355	0.00535	1424156_at		RBL1	retinoblastoma-like 1	Nucleus	transcription regulator
0.788	9.053	0.000169	1433933_s_at		SLCO2B1	solute carrier organic anion transporter family, member 2B1	Plasma Membrane	transporter
0.787	7.484	0.000572	1439825_at	D	DTX3L	deltex 3 like, E3 ubiquitin ligase	Cytoplasm	enzyme
0.783	9.295	4.49e-06	1448188_at		UCP2	uncoupling protein 2 (mitochondrial, proton carrier)	Cytoplasm	transporter
0.782	8.785	7.45e-05	1451780_at		BLNK	B-cell linker	Cytoplasm	other
0.778	8.451	1.13e-05	1452354_at		C2orf72	chromosome 2 open reading frame 72	Other	other
0.777	7.229	1.77e-06	1422033_a_at		CNTF	ciliary neurotrophic factor	Extracellular Space	cytokine
0.777	8.655	4.48e-09	1437811_x_at	D	COTL1	coactosin-like F-actin binding protein 1	Cytoplasm	other
0.775	9.64	8.86e-05	1449556_at		HLA-E	major histocompatibility complex, class I, E	Plasma Membrane	transmembrane receptor
0.774	8.229	0.000468	1448797_at		ELK3	ELK3, ETS-domain protein (SRF accessory protein 2)	Nucleus	transcription regulator
0.763	6.872	7.04e-05	1416342_at		TNC	tenascin C	Extracellular Space	other
0.761	10.551	8.13e-07	1460287_at	D	TIMP2	TIMP metallopeptidase inhibitor 2	Extracellular Space	other
0.758	6.491	1.83e-08	1426123_a_at	D	Rrbp1	ribosome binding protein 1	Cytoplasm	transporter
0.757	12.24	1.4e-06	1448732_at	D	CTSB	cathepsin B	Cytoplasm	peptidase
0.757	8.934	6.66e-07	1417928_at		PDLIM4	PDZ and LIM domain 4	Plasma Membrane	other
0.756	8.316	1.49e-07	1417495_x_at	D	CP	ceruloplasmin (ferroxidase)	Extracellular Space	enzyme
0.754	11.107	0.00448	1416101_a_at		HIST1H1C	histone cluster 1, H1c	Nucleus	other
0.754	8.552	4.44e-07	1415892_at		SGPL1	sphingosine-1-phosphate lyase 1	Cytoplasm	enzyme
0.753	12.069	1.81e-08	1423223_a_at		PRDX6	peroxiredoxin 6	Cytoplasm	enzyme
0.752	9.118	6.66e-06	1460220_a_at	D	CSF1	colony stimulating factor 1 (macrophage)	Extracellular Space	cytokine
0.75	8.817	5.32e-05	1419665_a_at		NUPR1	nuclear protein, transcriptional regulator, 1	Nucleus	transcription regulator
0.748	10.746	9.73e-07	1418004_a_at		TMEM176B	transmembrane protein 176B	Other	other
0.747	7.728	4.48e-05	1449419_at		DOCK8	dedicator of cytokinesis 8	Cytoplasm	other
0.744	7.801	9.8e-05	1424143_a_at		CDT1	chromatin licensing and DNA replication factor 1	Nucleus	other
0.738	9.349	0.000331	1422445_at	D	ITGA6	integrin, alpha 6	Plasma Membrane	transmembrane receptor
0.737	8.911	1.67e-05	1448200_at	D	TCN2	transcobalamin II	Extracellular Space	transporter
0.734	7.768	9.89e-05	1433696_at		HN1L	hematological and neurological expressed 1-like	Cytoplasm	other
0.728	10.153	0.000622	1450020_at		CX3CR1	chemokine (C-X3-C motif) receptor 1	Plasma Membrane	G-protein coupled receptor
0.728	8.225	0.000115	1434945_at		LPCAT2	lysophosphatidylcholine acyltransferase 2	Cytoplasm	enzyme
0.726	8.363	3.4e-05	1417379_at	D	IQGAP1	IQ motif containing GTPase activating protein 1	Cytoplasm	other
0.726	7.577	1.25e-05	1436448_a_at		PTGS1	prostaglandin-endoperoxide synthase 1 (prostaglandin G/H synthase and cyclooxygenase)	Cytoplasm	enzyme	acetaminophen/pentazocine, acetaminophen/clemastine/pseudoephedrine, aspirin/butalbital/caffeine, acetaminophen/caffeine/dihydrocodeine, aspirin/hydrocodone, aspirin/oxycodone, acetaminophen/aspirin/caffeine, aspirin/pravastatin, acetaminophen/dexbrompheniramine/pseudoephedrine, aspirin/meprobamate, aspirin/caffeine/propoxyphene, aspirin/butalbital/caffeine/codeine, aspirin/caffeine/dihydrocodein…
0.725	5.972	0.00161	1416295_a_at		IL2RG	interleukin 2 receptor, gamma	Plasma Membrane	transmembrane receptor	aldesleukin, denileukin diftitox
0.722	6.955	1.41e-05	1436171_at		ARHGAP30	Rho GTPase activating protein 30	Cytoplasm	other
0.715	7.763	9.71e-08	1425638_at	D	ADAP2	ArfGAP with dual PH domains 2	Cytoplasm	other
0.713	7.76	7.03e-05	1416827_at		TBXAS1	thromboxane A synthase 1 (platelet)	Plasma Membrane	enzyme	ridogrel
0.712	8.286	1.47e-05	1421358_at		HLA-G	major histocompatibility complex, class I, G	Plasma Membrane	other
0.712	9.141	2.02e-07	1417291_at		TNFRSF1A	tumor necrosis factor receptor superfamily, member 1A	Plasma Membrane	transmembrane receptor
0.71	9.085	5.17e-06	1451112_s_at		DAP	death-associated protein	Cytoplasm	transcription regulator
0.709	9.267	8.82e-05	1421812_at		TAPBP	TAP binding protein (tapasin)	Cytoplasm	transporter
0.708	10.057	0.000234	1426642_at		FN1	fibronectin 1	Extracellular Space	enzyme	ocriplasmin
0.694	7.127	0.000254	1428391_at		RAB3IL1	RAB3A interacting protein (rabin3)-like 1	Other	other
0.69	10.543	1.01e-06	1448128_at		CTSA	cathepsin A	Cytoplasm	peptidase
0.681	9.252	4.61e-05	1419289_a_at		SYNGR1	synaptogyrin 1	Plasma Membrane	transporter
0.677	8.699	8.2e-08	1418895_at		SKAP2	src kinase associated phosphoprotein 2	Cytoplasm	other
0.674	7.499	1.27e-05	1417706_at		NAGLU	N-acetylglucosaminidase, alpha	Cytoplasm	enzyme
0.674	6.84	2.69e-08	1433768_at	D	PALLD	palladin, cytoskeletal associated protein	Plasma Membrane	other
0.673	7.926	0.00411	1451912_a_at	D	FGFRL1	fibroblast growth factor receptor-like 1	Plasma Membrane	transmembrane receptor
0.671	8.407	1.9e-05	1417018_at		EFEMP2	EGF containing fibulin-like extracellular matrix protein 2	Extracellular Space	other
0.671	7.894	1.24e-06	1426926_at		PLCG2	phospholipase C, gamma 2 (phosphatidylinositol-specific)	Cytoplasm	enzyme
0.67	7.636	0.000147	1451362_at		RAB29	RAB29, member RAS oncogene family	Plasma Membrane	enzyme
0.669	7.434	0.000292	1421998_at	D	TOR3A	torsin family 3, member A	Cytoplasm	enzyme
0.667	9.212	1.04e-06	1460235_at		SCARB2	scavenger receptor class B, member 2	Plasma Membrane	other
0.665	7.988	0.000301	1416950_at		TNFAIP8	tumor necrosis factor, alpha-induced protein 8	Cytoplasm	other
0.66	8.806	3.31e-05	1420624_a_at		VAMP8	vesicle-associated membrane protein 8	Plasma Membrane	transporter
0.658	11.731	8.1e-06	1448513_a_at	D	NPC2	Niemann-Pick disease, type C2	Extracellular Space	other
0.653	7.894	0.000481	1427996_at		C1orf54	chromosome 1 open reading frame 54	Other	other
0.653	7.378	4.24e-07	1460257_a_at		MTHFS	5,10-methenyltetrahydrofolate synthetase (5-formyltetrahydrofolate cyclo-ligase)	Cytoplasm	enzyme
0.653	9.334	1.26e-06	1460344_at	D	PBXIP1	pre-B-cell leukemia homeobox interacting protein 1	Nucleus	transcription regulator
0.652	11.013	6.83e-05	1452734_at	D	RNASET2	ribonuclease T2	Cytoplasm	enzyme
0.65	10.421	6.3e-05	1420764_at		SCRG1	stimulator of chondrogenesis 1	Extracellular Space	other
0.647	6.571	0.000241	1420404_at		CD86	CD86 molecule	Plasma Membrane	transmembrane receptor	abatacept, belatacept, abatacept/methotrexate
0.645	8.121	2.61e-05	1417081_a_at	D	SYNGR2	synaptogyrin 2	Cytoplasm	other
0.637	8.073	0.000746	1416034_at	D	Cd24a	CD24a antigen	Plasma Membrane	other
0.636	9.99	0.00421	1425382_a_at	D	AQP4	aquaporin 4	Plasma Membrane	transporter
0.635	10.166	0.00279	1454159_a_at		IGFBP2	insulin-like growth factor binding protein 2, 36kDa	Extracellular Space	other
0.634	8.499	6.64e-06	1429775_a_at	D	Gpr137b-ps	G protein-coupled receptor 137B, pseudogene	Other	other
0.632	9.05	1.21e-05	1416619_at		C10orf54	chromosome 10 open reading frame 54	Plasma Membrane	other
0.63	7.367	8.88e-05	1455263_at		LACC1	laccase (multicopper oxidoreductase) domain containing 1	Other	other
0.627	8.409	4.92e-06	1437419_at	D	BMP2K	BMP2 inducible kinase	Nucleus	kinase
0.626	6.767	0.000105	1427041_at		THEMIS2	thymocyte selection associated family member 2	Other	other
0.623	8.296	7.83e-06	1452246_at		OSTF1	osteoclast stimulating factor 1	Nucleus	transcription regulator
0.622	9.055	7.13e-05	1416683_at		PLXNB2	plexin B2	Plasma Membrane	transmembrane receptor
0.622	6.891	0.00173	1418131_at		SAMHD1	SAM domain and HD domain 1	Nucleus	enzyme
0.621	8.753	4.01e-06	1426529_a_at		TAGLN2	transgelin 2	Cytoplasm	other
0.617	10.015	8.42e-05	1418704_at		S100A13	S100 calcium binding protein A13	Cytoplasm	other
0.616	7.027	2.47e-06	1417741_at		PYGL	phosphorylase, glycogen, liver	Cytoplasm	enzyme
0.615	10.675	0.00548	1424714_at		ALDOC	aldolase C, fructose-bisphosphate	Cytoplasm	enzyme
0.615	8.017	0.00111	1425719_a_at		NMI	N-myc (and STAT) interactor	Cytoplasm	transcription regulator
0.614	7.737	0.00029	1423062_at	D	IGFBP3	insulin-like growth factor binding protein 3	Extracellular Space	other
0.61	11.249	7.77e-08	1419814_s_at	D	S100A1	S100 calcium binding protein A1	Cytoplasm	other
0.608	6.43	4.28e-06	1421938_at		SERHL2	serine hydrolase-like 2	Cytoplasm	enzyme
0.606	8.47	9.22e-06	1419456_at		DCXR	dicarbonyl/L-xylulose reductase	Cytoplasm	enzyme
0.6	8.54	0.00566	1428394_at		PHYHD1	phytanoyl-CoA dioxygenase domain containing 1	Other	other
0.599	10.896	8.15e-08	1419499_at		GPAM	glycerol-3-phosphate acyltransferase, mitochondrial	Cytoplasm	enzyme
0.594	6.99	6.55e-05	1421547_at		CD180	CD180 molecule	Plasma Membrane	other
0.594	8.148	2.35e-05	1439189_at		FNIP2	folliculin interacting protein 2	Cytoplasm	other
0.593	9.313	2.52e-06	1435394_s_at		RHOC	ras homolog family member C	Plasma Membrane	enzyme
0.589	8.961	0.00108	1455871_s_at		TAX1BP3	Tax1 (human T-cell leukemia virus type I) binding protein 3	Cytoplasm	transcription regulator
0.587	8.563	0.000949	1426221_at		VWA5A	von Willebrand factor A domain containing 5A	Nucleus	other
0.584	7.618	0.00487	1433465_a_at		C16orf54	chromosome 16 open reading frame 54	Extracellular Space	other
0.583	10.115	0.000302	1428758_at		TMEM86A	transmembrane protein 86A	Other	other
0.582	8.924	4.76e-06	1423596_at	D	NEK6	NIMA-related kinase 6	Nucleus	kinase
0.576	8.447	2.97e-05	1448404_at	D	SCAMP2	secretory carrier membrane protein 2	Cytoplasm	transporter
0.575	6.939	1.04e-05	1416435_at		LTBR	lymphotoxin beta receptor (TNFR superfamily, member 3)	Plasma Membrane	transmembrane receptor
0.572	6.328	5e-05	1416832_at		SLC39A8	solute carrier family 39 (zinc transporter), member 8	Extracellular Space	transporter
0.57	7.129	0.000205	1437451_at		ECSCR	endothelial cell surface expressed chemotaxis and apoptosis regulator	Other	other
0.57	10.211	3.91e-06	1456312_x_at	D	GSN	gelsolin	Extracellular Space	other
0.57	7.775	3.28e-06	1448402_at		TLN1	talin 1	Plasma Membrane	other
0.567	5.866	4.16e-05	1422571_at		THBS2	thrombospondin 2	Extracellular Space	other
0.563	7.027	5.86e-05	1448744_at		GALNS	galactosamine (N-acetyl)-6-sulfate sulfatase	Cytoplasm	enzyme
0.561	9.206	2.18e-05	1423586_at		AXL	AXL receptor tyrosine kinase	Plasma Membrane	kinase	cabozantinib, cabozantinib/erlotinib
0.561	6.896	6.11e-05	1434976_x_at		EIF4EBP1	eukaryotic translation initiation factor 4E binding protein 1	Cytoplasm	translation regulator
0.561	8.299	7.14e-05	1448383_at		MMP14	matrix metallopeptidase 14 (membrane-inserted)	Extracellular Space	peptidase	marimastat
0.559	8.154	0.000318	1422782_s_at	D	TLR3	toll-like receptor 3	Plasma Membrane	transmembrane receptor	rintatolimod
0.557	7.452	0.00164	1427844_a_at	D	CEBPB	CCAAT/enhancer binding protein (C/EBP), beta	Nucleus	transcription regulator
0.557	8.212	3.56e-05	1451097_at		VASP	vasodilator-stimulated phosphoprotein	Plasma Membrane	other
0.55	6.419	8.97e-05	1421899_a_at		MR1	major histocompatibility complex, class I-related	Plasma Membrane	transmembrane receptor	antilymphocyte serum
0.549	7.513	0.000237	1424354_at		TMEM140	transmembrane protein 140	Other	other
0.548	7.561	0.000942	1437072_at		ARHGAP25	Rho GTPase activating protein 25	Cytoplasm	other
0.548	7.714	5.87e-07	1417756_a_at		LSP1	lymphocyte-specific protein 1	Cytoplasm	other
0.545	8.907	0.000129	1420824_at		SEMA4D	sema domain, immunoglobulin domain (Ig), transmembrane domain (TM) and short cytoplasmic domain, (semaphorin) 4D	Plasma Membrane	transmembrane receptor
0.543	7.351	1.01e-05	1439377_x_at		CDC20	cell division cycle 20	Nucleus	other
0.543	6.204	2.43e-05	1453416_at		GAS2L3	growth arrest-specific 2 like 3	Other	other
0.541	10.213	1.81e-06	1438928_x_at		NINJ1	ninjurin 1	Plasma Membrane	other
0.54	5.623	3.38e-05	1447803_x_at		CAPG	capping protein (actin filament), gelsolin-like	Nucleus	other
0.54	7.274	9.75e-05	1417540_at		ELF1	E74-like factor 1 (ets domain transcription factor)	Nucleus	transcription regulator
0.54	8.352	2.44e-06	1448134_at		PALD1	phosphatase domain containing, paladin 1	Cytoplasm	phosphatase
0.54	5.571	0.0001	1423774_a_at	D	PRC1	protein regulator of cytokinesis 1	Nucleus	other
0.54	8.493	0.000511	1455731_at		SLC29A3	solute carrier family 29 (equilibrative nucleoside transporter), member 3	Plasma Membrane	transporter
0.539	10.2	4.6e-05	1418010_a_at		SH3GLB1	SH3-domain GRB2-like endophilin B1	Cytoplasm	enzyme
0.538	10.833	0.000806	1449024_a_at		HEXA	hexosaminidase A (alpha polypeptide)	Cytoplasm	enzyme
0.536	8.513	9.12e-05	1416868_at		CDKN2C	cyclin-dependent kinase inhibitor 2C (p18, inhibits CDK4)	Nucleus	transcription regulator
0.535	10.977	4.84e-05	1428964_at		SLC25A18	solute carrier family 25 (glutamate carrier), member 18	Cytoplasm	transporter
0.534	5.471	0.00415	1422814_at		ASPM	asp (abnormal spindle) homolog, microcephaly associated (Drosophila)	Nucleus	other
0.531	9.114	3.88e-05	1421947_at		GNG12	guanine nucleotide binding protein (G protein), gamma 12	Plasma Membrane	enzyme
0.531	8.396	4.04e-05	1434121_at		LGI4	leucine-rich repeat LGI family, member 4	Extracellular Space	other
0.531	9.783	3.22e-06	1437380_x_at	D	PGD	phosphogluconate dehydrogenase	Cytoplasm	enzyme
0.529	12.073	2.85e-06	1422432_at	D	DBI	diazepam binding inhibitor (GABA receptor modulator, acyl-CoA binding protein)	Cytoplasm	other
0.529	8.823	0.000311	1424254_at		Ifitm1	interferon induced transmembrane protein 1	Other	other
0.526	9.869	0.000397	1428083_at		Neat1	nuclear paraspeckle assembly transcript 1 (non-protein coding)	Nucleus	other
0.526	10.366	0.00106	1450644_at		ZFP36L1	ZFP36 ring finger protein-like 1	Nucleus	transcription regulator
0.523	6.148	0.00174	1448777_at	D	MCM2	minichromosome maintenance complex component 2	Nucleus	enzyme
0.521	8.002	0.00109	1418382_at	D	APCDD1	adenomatosis polyposis coli down-regulated 1	Plasma Membrane	other
0.519	8.225	0.00494	1456307_s_at	D	ADCY7	adenylate cyclase 7	Plasma Membrane	enzyme
0.519	6.741	5.33e-05	1424378_at		LDLRAP1	low density lipoprotein receptor adaptor protein 1	Cytoplasm	transporter
0.518	6.919	3.46e-06	1424047_at		DERA	deoxyribose-phosphate aldolase (putative)	Other	enzyme
0.517	8.996	0.000168	1439255_s_at	D	GPR137B	G protein-coupled receptor 137B	Plasma Membrane	other
0.517	8.277	0.0031	1416881_at	D	MCL1	myeloid cell leukemia 1	Cytoplasm	transporter
0.516	7.743	6.61e-06	1438434_at		ARHGAP11A	Rho GTPase activating protein 11A	Cytoplasm	other
0.515	9.628	0.000854	1448754_at		RBP1	retinol binding protein 1, cellular	Extracellular Space	transporter
0.514	7.16	0.000332	1454783_at		IL13RA1	interleukin 13 receptor, alpha 1	Plasma Membrane	transmembrane receptor	cintredekin besudotox
0.514	9.195	1.07e-05	1451247_at	D	MFSD1	major facilitator superfamily domain containing 1	Other	transporter
0.512	12.519	0.00031	1448392_at	D	SPARC	secreted protein, acidic, cysteine-rich (osteonectin)	Extracellular Space	other
0.511	10.894	5.96e-06	1426724_at	D	CNN3	calponin 3, acidic	Cytoplasm	other
0.511	6.285	0.000566	1438021_at		RBM47	RNA binding motif protein 47	Other	other
0.508	9.082	7e-05	1451462_a_at		IFNAR2	interferon (alpha, beta and omega) receptor 2	Plasma Membrane	transmembrane receptor	interferon alfacon-1, PEG-interferon alfa-2a, interferon beta-1a, recombinant interferon, pegintron/ribavirin, interferon alfa-n1, PEG-interferon alfa-2a/ribavirin, IFNA2, hydroxyurea/recombinant interferon, interferon alfa-2b/ribavirin, pegintron, interferon beta-1b
0.505	7.537	7.66e-06	1435264_at		EMILIN2	elastin microfibril interfacer 2	Extracellular Space	other
0.504	8.026	0.000445	1416289_at		PLOD1	procollagen-lysine, 2-oxoglutarate 5-dioxygenase 1	Cytoplasm	enzyme
0.501	9.06	0.00188	1451344_at		TMEM119	transmembrane protein 119	Cytoplasm	other
0.499	9.741	5.64e-05	1416303_at		LITAF	lipopolysaccharide-induced TNF factor	Nucleus	transcription regulator
0.498	9.908	1.32e-06	1422185_a_at	D	Cyb5r3	cytochrome b5 reductase 3	Other	enzyme
0.497	8.543	2.51e-05	1426501_a_at		TIFA	TRAF-interacting protein with forkhead-associated domain	Other	other
0.495	7.867	0.000342	1416896_at		RPS6KA1	ribosomal protein S6 kinase, 90kDa, polypeptide 1	Cytoplasm	kinase
0.494	7.607	0.000127	1435803_a_at	D	EIF4E2	eukaryotic translation initiation factor 4E family member 2	Cytoplasm	translation regulator
0.493	8.619	5.35e-05	1449065_at		Acot1	acyl-CoA thioesterase 1	Cytoplasm	enzyme
0.492	9.02	0.00101	1452398_at		PLCE1	phospholipase C, epsilon 1	Cytoplasm	enzyme
0.487	9.354	0.000118	1426690_a_at		SREBF1	sterol regulatory element binding transcription factor 1	Nucleus	transcription regulator
0.485	10.481	0.0008	1427100_at		METRN	meteorin, glial cell differentiation regulator	Extracellular Space	other
0.484	9.298	6.63e-06	1419367_at		DECR1	2,4-dienoyl CoA reductase 1, mitochondrial	Cytoplasm	enzyme
0.483	7.024	5.07e-06	1436707_x_at		NCAPH	non-SMC condensin I complex, subunit H	Nucleus	other
0.483	9.175	8.24e-06	1431299_a_at		PPP1R18	protein phosphatase 1, regulatory subunit 18	Other	other
0.483	6.934	9.15e-06	1428976_at		TMPO	thymopoietin	Nucleus	other
0.478	8.24	0.00018	1436119_at		ALDH1L2	aldehyde dehydrogenase 1 family, member L2	Cytoplasm	enzyme
0.478	8.474	0.00399	1436808_x_at		MCM5	minichromosome maintenance complex component 5	Nucleus	enzyme
0.478	7.255	2.66e-05	1450697_at		SLC30A7	solute carrier family 30 (zinc transporter), member 7	Cytoplasm	transporter
0.475	7.416	0.000193	1451099_at		ESYT1	extended synaptotagmin-like protein 1	Other	other
0.475	10.569	8.4e-06	1435429_x_at	D	RPS27L	ribosomal protein S27-like	Other	translation regulator
0.475	6.988	0.000175	1452492_a_at		SLC37A2	solute carrier family 37 (glucose-6-phosphate transporter), member 2	Cytoplasm	transporter
0.473	9.04	0.00111	1436954_at	D	WIPF1	WAS/WASL interacting protein family, member 1	Cytoplasm	other
0.472	9.758	0.000509	1424988_at		MYLIP	myosin regulatory light chain interacting protein	Cytoplasm	enzyme
0.472	7.975	1.09e-05	1453572_a_at		PLP2	proteolipid protein 2 (colonic epithelium-enriched)	Cytoplasm	transporter
0.472	8.813	0.00113	1423505_at		TAGLN	transgelin	Cytoplasm	other
0.47	9.075	0.00325	1450410_a_at		SLC48A1	solute carrier family 48 (heme transporter), member 1	Other	other
0.47	8.552	7.28e-06	1451538_at	D	SOX9	SRY (sex determining region Y)-box 9	Nucleus	transcription regulator
0.469	6.734	0.000163	1420413_at		SLC7A11	solute carrier family 7 (anionic amino acid transporter light chain, xc- system), member 11	Plasma Membrane	transporter
0.466	7.531	0.00264	1419086_at		FGFBP1	fibroblast growth factor binding protein 1	Extracellular Space	other
0.464	8.401	0.000231	1449852_a_at		EHD4	EH-domain containing 4	Plasma Membrane	enzyme
0.464	8.984	0.0057	1449875_s_at		H2-T9	histocompatibility 2, T region locus 9	Other	other
0.463	12.265	0.00442	1425546_a_at		TF	transferrin	Extracellular Space	transporter
0.462	7.178	0.00018	1460604_at		CYBRD1	cytochrome b reductase 1	Cytoplasm	enzyme
0.462	11.191	2.72e-06	1433488_x_at	D	GNS	glucosamine (N-acetyl)-6-sulfatase	Cytoplasm	enzyme
0.462	8.591	2.16e-05	1417013_at	D	HSPB8	heat shock 22kDa protein 8	Cytoplasm	kinase
0.462	9.583	0.000345	1449127_at		SELPLG	selectin P ligand	Plasma Membrane	other
0.461	12.024	0.00122	1416022_at	D	FABP5	fatty acid binding protein 5 (psoriasis-associated)	Cytoplasm	transporter
0.461	9.408	2.95e-06	1423960_at		LPCAT3	lysophosphatidylcholine acyltransferase 3	Plasma Membrane	enzyme
0.461	6.778	0.000197	1451791_at	D	TFPI	tissue factor pathway inhibitor (lipoprotein-associated coagulation inhibitor)	Extracellular Space	other	dalteparin
0.459	10.059	9.39e-06	1424400_a_at		ALDH1L1	aldehyde dehydrogenase 1 family, member L1	Cytoplasm	enzyme
0.459	5.823	0.00224	1429954_at		Clec4a3	C-type lectin domain family 4, member a3	Other	other
0.459	10.899	6.98e-05	1425560_a_at	D	S100A16	S100 calcium binding protein A16	Nucleus	other
0.458	10.534	8.38e-05	1420895_at		TGFBR1	transforming growth factor, beta receptor 1	Plasma Membrane	kinase
0.455	8.69	0.000449	1426555_at	D	SCPEP1	serine carboxypeptidase 1	Cytoplasm	peptidase
0.455	7.452	0.00105	1429270_a_at		SYCE2	synaptonemal complex central element protein 2	Nucleus	other
0.453	10.277	1.21e-05	1416328_a_at		ATP6V0E1	ATPase, H+ transporting, lysosomal 9kDa, V0 subunit e1	Cytoplasm	transporter
0.453	6.119	0.00044	1434322_at		MICALL2	MICAL-like 2	Cytoplasm	other
0.452	5.812	0.000417	1431004_at		LOXL2	lysyl oxidase-like 2	Extracellular Space	enzyme
0.451	7.276	3.69e-05	1450876_at	D	CFH	complement factor H	Extracellular Space	other
0.451	7.763	0.0018	1448592_at		CRTAP	cartilage associated protein	Extracellular Space	other
0.448	8.285	0.000198	1435526_at		TOR1AIP2	torsin A interacting protein 2	Cytoplasm	other
0.447	7.506	4.15e-05	1416544_at		EZH2	enhancer of zeste homolog 2 (Drosophila)	Nucleus	transcription regulator
0.447	9.36	1.45e-05	1450914_at		PPP1R14B	protein phosphatase 1, regulatory (inhibitor) subunit 14B	Cytoplasm	phosphatase
0.447	7.148	0.00139	1450165_at		Slfn2	schlafen 2	Cytoplasm	other
0.446	10.034	2.85e-06	1416109_at	D	FUCA1	fucosidase, alpha-L- 1, tissue	Cytoplasm	enzyme
0.446	10.784	3.81e-06	1433866_x_at	D	PRDX1	peroxiredoxin 1	Cytoplasm	enzyme
0.446	8.113	4.66e-07	1420635_a_at		TCIRG1	T-cell, immune regulator 1, ATPase, H+ transporting, lysosomal V0 subunit A3	Plasma Membrane	enzyme
0.446	7.286	6.99e-06	1416757_at		ZWILCH	zwilch kinetochore protein	Nucleus	other
0.445	9.719	0.00013	1418888_a_at		MSRB1	methionine sulfoxide reductase B1	Other	other
0.442	8.659	0.00152	1424186_at		CCDC80	coiled-coil domain containing 80	Nucleus	other
0.442	11.993	0.00117	1423985_at	D	GNG5	guanine nucleotide binding protein (G protein), gamma 5	Plasma Membrane	other
0.442	8.609	0.000591	1416968_a_at		HSD3B7	hydroxy-delta-5-steroid dehydrogenase, 3 beta- and steroid delta-isomerase 7	Cytoplasm	enzyme
0.441	9.905	0.0026	1449885_at		TMEM47	transmembrane protein 47	Plasma Membrane	other
0.438	9.844	5.42e-06	1451201_s_at		RNH1	ribonuclease/angiogenin inhibitor 1	Cytoplasm	other
0.438	8.041	1.6e-05	1439462_x_at	D	TMED10	transmembrane emp24-like trafficking protein 10 (yeast)	Cytoplasm	transporter
0.435	9.389	0.000503	1415828_a_at	D	SERP1	stress-associated endoplasmic reticulum protein 1	Cytoplasm	other
0.433	6.698	5.35e-05	1448562_at		UPP1	uridine phosphorylase 1	Cytoplasm	enzyme
0.432	5.898	0.000952	1429364_at		C4orf46	chromosome 4 open reading frame 46	Other	other
0.432	8.56	0.0011	1426886_at		CLN5	ceroid-lipofuscinosis, neuronal 5	Cytoplasm	other
0.432	5.73	0.000478	1437760_at		GALNT12	polypeptide N-acetylgalactosaminyltransferase 12	Cytoplasm	enzyme
0.429	6.63	0.000677	1429295_s_at		TRIP13	thyroid hormone receptor interactor 13	Cytoplasm	transcription regulator
0.428	8.041	1.47e-05	1423452_at		STK17B	serine/threonine kinase 17b	Nucleus	kinase
0.427	8.566	0.0001	1416511_a_at	D	CDC42EP4	CDC42 effector protein (Rho GTPase binding) 4	Cytoplasm	other
0.427	6.21	0.000512	1417450_a_at		TACC3	transforming, acidic coiled-coil containing protein 3	Nucleus	other
0.426	13.184	4.93e-05	1432466_a_at		APOE	apolipoprotein E	Extracellular Space	transporter
0.425	5.946	0.00459	1438954_x_at		FIGF	c-fos induced growth factor (vascular endothelial growth factor D)	Extracellular Space	growth factor
0.425	8.758	0.00315	1416389_a_at		RCBTB2	regulator of chromosome condensation (RCC1) and BTB (POZ) domain containing protein 2	Cytoplasm	other
0.424	8.174	0.000135	1455556_at		NOTCH2	notch 2	Plasma Membrane	transcription regulator
0.423	7.162	0.000784	1455915_at		GALNT4	polypeptide N-acetylgalactosaminyltransferase 4	Cytoplasm	enzyme
0.422	7.416	1.46e-05	1451103_at		HAUS4	HAUS augmin-like complex, subunit 4	Cytoplasm	other
0.421	8.189	0.000248	1428696_at		RFTN1	raftlin, lipid raft linker 1	Plasma Membrane	other
0.42	9.425	2.26e-06	1455824_x_at	D	STT3A	STT3A, subunit of the oligosaccharyltransferase complex (catalytic)	Plasma Membrane	enzyme
0.417	10.391	1.21e-05	1438024_at		MCUR1	mitochondrial calcium uniporter regulator 1	Cytoplasm	other
0.415	9.561	0.000424	1452035_at		COL4A1	collagen, type IV, alpha 1	Extracellular Space	other	collagenase clostridium histolyticum
0.415	10.28	8e-05	1417056_at		PSME1	proteasome (prosome, macropain) activator subunit 1 (PA28 alpha)	Cytoplasm	other
0.414	9.954	0.00598	1434637_x_at	D	SIN3B	SIN3 transcription regulator family member B	Nucleus	transcription regulator
0.413	10.3	0.000108	1437626_at		ZFP36L2	ZFP36 ring finger protein-like 2	Nucleus	transcription regulator
0.412	9.429	5.08e-05	1416607_at	D	C11orf54	chromosome 11 open reading frame 54	Nucleus	other
0.41	7.81	0.000444	1452416_at		IL6R	interleukin 6 receptor	Plasma Membrane	transmembrane receptor	tocilizumab
0.41	7.186	0.00293	1456439_x_at		MICAL1	microtubule associated monooxygenase, calponin and LIM domain containing 1	Cytoplasm	enzyme
0.41	7.144	9.74e-05	1428859_at		PAOX	polyamine oxidase (exo-N4-amino)	Cytoplasm	enzyme
0.41	9.963	0.000115	1426587_a_at	D	STAT3	signal transducer and activator of transcription 3 (acute-phase response factor)	Nucleus	transcription regulator
0.409	10.919	0.00356	1419027_s_at		GLTP	glycolipid transfer protein	Cytoplasm	transporter
0.409	7.687	0.00177	1452527_a_at		P2RX4	purinergic receptor P2X, ligand-gated ion channel, 4	Plasma Membrane	ion channel
0.408	8.256	0.000294	1415801_at	D	GJA1	gap junction protein, alpha 1, 43kDa	Plasma Membrane	transporter
0.408	8.958	0.000383	1433694_at		PDE3B	phosphodiesterase 3B, cGMP-inhibited	Cytoplasm	enzyme	dyphylline, nitroglycerin, medorinone, aminophylline, cilostazol, dipyridamole, amrinone, tolbutamide, theophylline, pentoxifylline
0.408	7.983	5.75e-05	1423809_at		TCF19	transcription factor 19	Nucleus	transcription regulator
0.403	7.531	0.00494	1418248_at		GLA	galactosidase, alpha	Cytoplasm	enzyme
0.401	8.273	4.56e-05	1428132_at		CDC42SE1	CDC42 small effector 1	Plasma Membrane	other
0.401	10.187	0.00141	1437347_at		EDNRB	endothelin receptor type B	Plasma Membrane	G-protein coupled receptor	bosentan, sitaxsentan, macitentan, atrasentan
0.401	7.074	7.43e-05	1460366_at		EML3	echinoderm microtubule associated protein like 3	Other	other
0.4	5.756	0.000531	1439273_at		RIPK1	receptor (TNFRSF)-interacting serine-threonine kinase 1	Plasma Membrane	kinase
0.399	8.721	4.21e-05	1415878_at	D	RRM1	ribonucleotide reductase M1	Nucleus	enzyme	cytarabine/fludarabine phosphate, gemcitabine/vismodegib, bortezomib/cladribine/rituximab, gemcitabine/paclitaxel, erlotinib/gemcitabine, cyclophosphamide/fludarabine phosphate/rituximab, cladribine/cytarabine/daunorubicin, gemcitabine/oxaliplatin, gemcitabine/vinorelbine, docetaxel/gemcitabine, docetaxel/gemcitabine/vincristine, cladribine/cytarabine/filgrastim, clofarabine/cyclophosphamide/etop…
0.398	9.744	0.000304	1415698_at		GOLM1	golgi membrane protein 1	Cytoplasm	other
0.397	8.747	0.00294	1424483_at		MOB1A	MOB kinase activator 1A	Plasma Membrane	other
0.396	5.723	0.000135	1417070_at	D	CYP4V2	cytochrome P450, family 4, subfamily V, polypeptide 2	Cytoplasm	enzyme
0.394	8.555	0.00182	1435918_at		FAM107A	family with sequence similarity 107, member A	Nucleus	other
0.394	10.94	0.000532	1419449_a_at	D	GNAI2	guanine nucleotide binding protein (G protein), alpha inhibiting activity polypeptide 2	Plasma Membrane	other
0.392	8.491	0.000108	1452330_a_at		MXRA8	matrix-remodelling associated 8	Other	other
0.39	8.361	0.00056	1433741_at		CD38	CD38 molecule	Plasma Membrane	enzyme
0.39	5.321	0.00165	1432361_a_at		CENPP	centromere protein P	Other	other
0.39	8.731	8.33e-05	1448167_at		IFNGR1	interferon gamma receptor 1	Plasma Membrane	transmembrane receptor	interferon gamma-1b
0.389	7.793	0.000173	1421392_a_at		BIRC3	baculoviral IAP repeat containing 3	Cytoplasm	enzyme
0.389	7.988	0.000511	1455520_at		Ppp2r5c	protein phosphatase 2, regulatory subunit B', gamma	Nucleus	other
0.389	8.183	0.000324	1438241_at		RGMA	repulsive guidance molecule family member a	Plasma Membrane	other
0.388	8.336	0.000323	1436158_at		EIF4EBP2	eukaryotic translation initiation factor 4E binding protein 2	Cytoplasm	other
0.388	7.954	0.000157	1433455_at		SH2B3	SH2B adaptor protein 3	Plasma Membrane	other
0.387	7.571	0.00244	1425860_x_at		CKLF	chemokine-like factor	Extracellular Space	cytokine
0.386	6.536	0.00385	1455494_at		COL1A1	collagen, type I, alpha 1	Extracellular Space	other	collagenase clostridium histolyticum
0.386	9.642	3.72e-05	1450941_at	D	SDCBP	syndecan binding protein (syntenin)	Plasma Membrane	enzyme
0.385	8.06	0.00565	1437208_at		SEPT10	septin 10	Cytoplasm	transcription regulator
0.384	5.506	0.000442	1449297_at		Casp12	caspase 12	Other	peptidase
0.384	10.291	0.000875	1429159_at	D	ITIH5	inter-alpha-trypsin inhibitor heavy chain family, member 5	Other	other
0.384	9.54	4.53e-05	1449893_a_at	D	LRIG1	leucine-rich repeats and immunoglobulin-like domains 1	Extracellular Space	other
0.383	11.739	3.56e-05	1460671_at		GPX1	glutathione peroxidase 1	Cytoplasm	enzyme
0.382	9.445	0.000134	1437670_x_at	D	CD151	CD151 molecule (Raph blood group)	Plasma Membrane	other
0.382	8.625	0.001	1451114_at	D	CMTM6	CKLF-like MARVEL transmembrane domain containing 6	Extracellular Space	cytokine
0.382	9.885	0.000437	1417133_at		PMP22	peripheral myelin protein 22	Plasma Membrane	other
0.381	6.906	0.00097	1448786_at		PLBD1	phospholipase B domain containing 1	Extracellular Space	other
0.381	9.774	0.0013	1417189_at		PSME2	proteasome (prosome, macropain) activator subunit 2 (PA28 beta)	Cytoplasm	peptidase
0.378	6.294	3.76e-05	1418509_at		Cbr2	carbonyl reductase 2	Cytoplasm	enzyme
0.378	8.03	7.82e-06	1416627_at		SPINT1	serine peptidase inhibitor, Kunitz type 1	Extracellular Space	other
0.377	7.985	0.000793	1450981_at		CNN2	calponin 2	Cytoplasm	other
0.376	8.445	2.07e-05	1426918_at	D	ITGB1	integrin, beta 1 (fibronectin receptor, beta polypeptide, antigen CD29 includes MDF2, MSK12)	Plasma Membrane	transmembrane receptor
0.376	7.859	0.00143	1451361_a_at		PNPLA7	patatin-like phospholipase domain containing 7	Cytoplasm	other
0.375	8.297	0.000998	1450959_at		AKIP1	A kinase (PRKA) interacting protein 1	Nucleus	other
0.375	8.238	0.00117	1427287_s_at		ITPR2	inositol 1,4,5-trisphosphate receptor, type 2	Cytoplasm	ion channel
0.375	7.304	0.00114	1423627_at		NQO1	NAD(P)H dehydrogenase, quinone 1	Cytoplasm	enzyme
0.375	9.421	0.000305	1418912_at		PLXDC2	plexin domain containing 2	Extracellular Space	other
0.374	5.386	0.00126	1416740_at		COL5A1	collagen, type V, alpha 1	Extracellular Space	other	collagenase clostridium histolyticum
0.374	9.576	3.47e-05	1424424_at		SLC39A1	solute carrier family 39 (zinc transporter), member 1	Plasma Membrane	transporter
0.374	8.301	0.000418	1438559_x_at	D	SLC44A2	solute carrier family 44 (choline transporter), member 2	Extracellular Space	transporter
0.373	9.041	8.6e-06	1451218_at		EDEM1	ER degradation enhancer, mannosidase alpha-like 1	Cytoplasm	enzyme
0.373	8.731	7.31e-05	1424874_a_at		PTBP1	polypyrimidine tract binding protein 1	Nucleus	enzyme
0.372	10.033	0.000585	1416315_at	D	ABHD4	abhydrolase domain containing 4	Other	peptidase
0.372	6.675	0.000437	1460615_at		NT5DC1	5'-nucleotidase domain containing 1	Other	other
0.371	9.673	0.00026	1427020_at		SCARA3	scavenger receptor class A, member 3	Plasma Membrane	transmembrane receptor
0.37	9.914	0.000485	1448263_a_at	D	CNDP2	CNDP dipeptidase 2 (metallopeptidase M20 family)	Cytoplasm	peptidase
0.37	8.705	6.15e-06	1452288_at		MTMR10	myotubularin related protein 10	Other	other
0.369	6.269	0.000133	1434980_at		PIK3R5	phosphoinositide-3-kinase, regulatory subunit 5	Cytoplasm	kinase
0.369	8.666	4.76e-05	1436890_at		UAP1L1	UDP-N-acteylglucosamine pyrophosphorylase 1-like 1	Other	other
0.368	8.948	7.68e-05	1450656_at	D	GNA13	guanine nucleotide binding protein (G protein), alpha 13	Plasma Membrane	enzyme
0.368	6.768	0.00209	1419585_at		RP2	retinitis pigmentosa 2 (X-linked recessive)	Cytoplasm	enzyme
0.367	8.02	0.000206	1416641_at		LIG1	ligase I, DNA, ATP-dependent	Nucleus	enzyme
0.367	7.049	3.23e-05	1452351_at		PARP4	poly (ADP-ribose) polymerase family, member 4	Cytoplasm	enzyme
0.367	7.526	0.00569	1424716_at		RETSAT	retinol saturase (all-trans-retinol 13,14-reductase)	Cytoplasm	enzyme
0.366	12.172	0.00385	1451431_a_at		DBNDD2	dysbindin (dystrobrevin binding protein 1) domain containing 2	Cytoplasm	other
0.366	9.695	6.29e-05	1454673_at		WASF2	WAS protein family, member 2	Plasma Membrane	other
0.363	8.36	0.000192	1456005_a_at	D	BCL2L11	BCL2-like 11 (apoptosis facilitator)	Cytoplasm	other
0.363	8.44	0.000336	1451627_a_at		SLC1A2	solute carrier family 1 (glial high affinity glutamate transporter), member 2	Plasma Membrane	transporter	riluzole
0.362	11.768	4.29e-05	1422506_a_at	D	CSTB	cystatin B (stefin B)	Cytoplasm	peptidase
0.362	10.306	7.29e-05	1460184_at	D	HADH	hydroxyacyl-CoA dehydrogenase	Cytoplasm	enzyme
0.361	9.626	0.000491	1436193_at		MAN1C1	mannosidase, alpha, class 1C, member 1	Cytoplasm	enzyme
0.361	8.908	0.00251	1452197_at		SMC4	structural maintenance of chromosomes 4	Nucleus	transporter
0.36	7.095	0.00346	1434921_at		NR2E1	nuclear receptor subfamily 2, group E, member 1	Nucleus	ligand-dependent nuclear receptor
0.359	9.668	0.000186	1450099_a_at	D	GBA	glucosidase, beta, acid	Cytoplasm	enzyme
0.355	9.097	0.0012	1416326_at		CRIP1	cysteine-rich protein 1 (intestinal)	Cytoplasm	other
0.354	8.547	3.97e-05	1416954_at		SLC25A10	solute carrier family 25 (mitochondrial carrier; dicarboxylate transporter), member 10	Cytoplasm	transporter
0.354	8.441	6.46e-05	1438910_a_at		STOM	stomatin	Plasma Membrane	other
0.35	7.877	0.00557	1436105_at	D	Ccdc74a	coiled-coil domain containing 74A	Other	other
0.35	7.399	0.00148	1417811_at		SLC8B1	solute carrier family 8 (sodium/lithium/calcium exchanger), member B1	Plasma Membrane	transporter
0.349	6.973	8.72e-05	1421546_a_at		RACGAP1	Rac GTPase activating protein 1	Cytoplasm	transporter
0.348	7.467	0.00201	1417551_at		CLN3	ceroid-lipofuscinosis, neuronal 3	Cytoplasm	other
0.348	6.577	0.00312	1459913_at		TNFSF10	tumor necrosis factor (ligand) superfamily, member 10	Extracellular Space	cytokine
0.347	9.392	6e-05	1435272_at		ITPKB	inositol-trisphosphate 3-kinase B	Cytoplasm	kinase
0.347	8.922	0.00012	1418962_at		NECAP2	NECAP endocytosis associated 2	Cytoplasm	other
0.346	6.394	0.00595	1429359_s_at		RBPMS	RNA binding protein with multiple splicing	Other	transcription regulator
0.345	7.912	0.00553	1426677_at		FLNA	filamin A, alpha	Cytoplasm	other
0.345	10.263	0.000311	1423613_at		SSFA2	sperm specific antigen 2	Plasma Membrane	other
0.344	6.501	0.000941	1442804_at		FGR	feline Gardner-Rasheed sarcoma viral oncogene homolog	Nucleus	kinase	vemurafenib
0.344	8.409	0.00272	1448436_a_at		IRF1	interferon regulatory factor 1	Nucleus	transcription regulator
0.344	9.581	0.000922	1448793_a_at		SDC4	syndecan 4	Plasma Membrane	other
0.343	8.892	2.32e-05	1429556_at		TEAD1	TEA domain family member 1 (SV40 transcriptional enhancer factor)	Nucleus	transcription regulator
0.341	9.271	0.000288	1460409_at		CPT1A	carnitine palmitoyltransferase 1A (liver)	Cytoplasm	enzyme	perhexiline
0.341	11.254	4.91e-05	1438115_a_at	D	SLC9A3R1	solute carrier family 9, subfamily A (NHE3, cation proton antiporter 3), member 3 regulator 1	Plasma Membrane	other
0.341	7.778	0.00036	1423077_at		SNX9	sorting nexin 9	Cytoplasm	transporter
0.34	9.974	0.00309	1429185_at		ARHGEF26	Rho guanine nucleotide exchange factor (GEF) 26	Plasma Membrane	other
0.34	7.475	0.00188	1420959_at	D	ASPH	aspartate beta-hydroxylase	Cytoplasm	enzyme
0.34	9.559	0.00279	1455819_at		PTBP3	polypyrimidine tract binding protein 3	Nucleus	other
0.339	9.892	0.00418	1420928_at		ST6GAL1	ST6 beta-galactosamide alpha-2,6-sialyltranferase 1	Cytoplasm	enzyme
0.338	7.408	0.000752	1429049_at		NUAK2	NUAK family, SNF1-like kinase, 2	Other	kinase
0.338	11.693	0.00053	1449018_at		PFN1	profilin 1	Cytoplasm	other
0.337	8.116	0.00449	1458438_at		CCDC122	coiled-coil domain containing 122	Other	other
0.337	9.436	7.03e-05	1419595_a_at		GGH	gamma-glutamyl hydrolase (conjugase, folylpolygammaglutamyl hydrolase)	Cytoplasm	peptidase
0.336	11.506	0.00419	1437503_a_at		SHISA5	shisa family member 5	Nucleus	other
0.335	8.421	0.00237	1428615_at		LPAR6	lysophosphatidic acid receptor 6	Plasma Membrane	G-protein coupled receptor
0.335	7.885	0.000112	1425565_at		REST	RE1-silencing transcription factor	Nucleus	transcription regulator
0.334	9.32	0.00257	1453473_a_at	D	DYNLT1	dynein, light chain, Tctex-type 1	Cytoplasm	other
0.333	6.558	0.00535	1450702_at		HFE	hemochromatosis	Plasma Membrane	transmembrane receptor
0.333	9.597	0.000927	1456135_s_at		PXN	paxillin	Cytoplasm	other
0.332	11.637	0.000425	1416329_at	D	CYFIP1	cytoplasmic FMR1 interacting protein 1	Cytoplasm	other
0.331	11.519	0.000108	1419601_at		KCNJ10	potassium inwardly-rectifying channel, subfamily J, member 10	Plasma Membrane	ion channel
0.329	8.026	0.00159	1424595_at		F11R	F11 receptor	Plasma Membrane	other
0.328	9.307	0.000206	1440831_at		BACH1	BTB and CNC homology 1, basic leucine zipper transcription factor 1	Nucleus	transcription regulator
0.328	9.788	0.00242	1416830_at		C1orf85	chromosome 1 open reading frame 85	Cytoplasm	transcription regulator
0.328	8.301	0.00195	1452814_at	D	CPNE3	copine III	Cytoplasm	kinase
0.328	6.175	0.001	1447813_x_at		SLA	Src-like-adaptor	Plasma Membrane	other
0.328	8.992	0.000481	1426584_a_at	D	SORD	sorbitol dehydrogenase	Cytoplasm	enzyme
0.327	9.312	0.00493	1428332_at	D	PIK3IP1	phosphoinositide-3-kinase interacting protein 1	Other	other
0.326	7.69	0.000167	1444517_at		C12orf55	chromosome 12 open reading frame 55	Other	other
0.326	7.973	0.00296	1417926_at		NCAPG2	non-SMC condensin II complex, subunit G2	Nucleus	other
0.325	8.781	0.00272	1424444_a_at		C19orf12	chromosome 19 open reading frame 12	Other	other
0.325	7.338	0.000611	1449981_a_at		NAT1	N-acetyltransferase 1 (arylamine N-acetyltransferase)	Cytoplasm	enzyme
0.325	7.844	0.000613	1424990_at		ORAI1	ORAI calcium release-activated calcium modulator 1	Plasma Membrane	ion channel
0.323	10.878	0.00573	1416503_at		LXN	latexin	Cytoplasm	other
0.322	8.887	9.82e-05	1434665_at		AGA	aspartylglucosaminidase	Cytoplasm	enzyme
0.322	11.79	0.00287	1416416_x_at	D	GSTM5	glutathione S-transferase mu 5	Cytoplasm	enzyme
0.321	8.639	0.000606	1424160_at		ALG5	ALG5, dolichyl-phosphate beta-glucosyltransferase	Cytoplasm	enzyme
0.321	5.829	0.00296	1448899_s_at	D	RAD51AP1	RAD51 associated protein 1	Nucleus	other
0.318	7.391	0.000552	1424779_at	D	REEP3	receptor accessory protein 3	Other	other
0.318	9.488	0.00479	1416359_at		SNX18	sorting nexin 18	Cytoplasm	transporter
0.317	8.407	0.00111	1421731_a_at		FEN1	flap structure-specific endonuclease 1	Nucleus	enzyme
0.317	9.69	3.13e-05	1450686_at	D	PON2	paraoxonase 2	Plasma Membrane	enzyme
0.316	9.441	8e-05	1436339_at		1810058I24Rik	RIKEN cDNA 1810058I24 gene	Other	other
0.316	6.542	0.000371	1419703_at		COL5A3	collagen, type V, alpha 3	Extracellular Space	other	collagenase clostridium histolyticum
0.316	8.205	0.000834	1416433_at		RPA2	replication protein A2, 32kDa	Nucleus	other
0.316	10.091	0.000145	1423732_at		TRAM1	translocation associated membrane protein 1	Cytoplasm	other
0.314	6.919	0.00136	1424404_at		C4orf19	chromosome 4 open reading frame 19	Other	other
0.314	6.682	0.000106	1424882_a_at		NT5DC2	5'-nucleotidase domain containing 2	Other	other
0.313	9.527	0.00042	1416836_at		LRP10	low density lipoprotein receptor-related protein 10	Plasma Membrane	transmembrane receptor
0.312	11.535	0.00137	1420838_at	D	NTRK2	neurotrophic tyrosine kinase, receptor, type 2	Plasma Membrane	kinase	cabozantinib, cabozantinib/erlotinib
0.311	9.074	0.000183	1448564_at		CIB1	calcium and integrin binding 1 (calmyrin)	Nucleus	other
0.311	11.294	1.28e-05	1437465_a_at		P4HB	prolyl 4-hydroxylase, beta polypeptide	Cytoplasm	enzyme
0.31	9.012	5.56e-05	1420703_at		CSF2RA	colony stimulating factor 2 receptor, alpha, low-affinity (granulocyte-macrophage)	Plasma Membrane	transmembrane receptor	sargramostim, mavrilimumab, EPO/sargramostim, rituximab/sargramostim
0.31	8.225	0.00591	1436163_at		KCNJ16	potassium inwardly-rectifying channel, subfamily J, member 16	Plasma Membrane	ion channel
0.31	8.961	0.000389	1436555_at		SLC7A2	solute carrier family 7 (cationic amino acid transporter, y+ system), member 2	Plasma Membrane	transporter
0.308	8.961	0.00122	1438320_s_at	D	MCM7	minichromosome maintenance complex component 7	Nucleus	enzyme
0.308	8.649	0.0051	1423747_a_at	D	PDK1	pyruvate dehydrogenase kinase, isozyme 1	Cytoplasm	kinase	dichloroacetic acid
0.307	8.063	0.00588	1448316_at		CMTM3	CKLF-like MARVEL transmembrane domain containing 3	Extracellular Space	cytokine
0.307	7.649	0.000511	1442542_at		EYA4	eyes absent homolog 4 (Drosophila)	Cytoplasm	phosphatase
0.307	7.269	0.00077	1423847_at		NCAPD2	non-SMC condensin I complex, subunit D2	Nucleus	other
0.306	9.247	0.00478	1441081_a_at		1110038B12Rik	RIKEN cDNA 1110038B12 gene	Other	other
0.306	8.606	0.00605	1440975_at		Mxra7	matrix-remodelling associated 7	Other	other
0.305	6.721	0.00441	1452210_at		DNA2	DNA replication helicase/nuclease 2	Cytoplasm	enzyme
0.305	8.077	0.00319	1417205_at		KDELR2	KDEL (Lys-Asp-Glu-Leu) endoplasmic reticulum protein retention receptor 2	Cytoplasm	other
0.304	6.4	0.000293	1424304_at		TPCN2	two pore segment channel 2	Cytoplasm	ion channel
0.303	9.32	0.000249	1416188_at	D	GM2A	GM2 ganglioside activator	Cytoplasm	enzyme
0.303	12.621	5.37e-05	1419441_at		RPLP0	ribosomal protein, large, P0	Cytoplasm	other
0.303	6.447	0.00128	1437488_at	D	SLC9A9	solute carrier family 9, subfamily A (NHE9, cation proton antiporter 9), member 9	Cytoplasm	transporter
0.301	8.258	0.000439	1434855_at		AMDHD2	amidohydrolase domain containing 2	Nucleus	enzyme
0.3	8.341	0.00167	1421859_at		ADAM17	ADAM metallopeptidase domain 17	Plasma Membrane	peptidase
0.3	10.762	0.00296	1423298_at	D	ADD3	adducin 3 (gamma)	Cytoplasm	other
0.3	8.744	0.00206	1422452_at		BAG3	BCL2-associated athanogene 3	Cytoplasm	other
0.3	7.042	1.18e-05	1455291_s_at	D	ZNRF2	zinc and ring finger 2	Other	enzyme
0.299	7.293	0.000106	1418862_at		ECHDC3	enoyl CoA hydratase domain containing 3	Cytoplasm	enzyme
0.299	8.322	0.001	1434387_at		ITFG3	integrin alpha FG-GAP repeat containing 3	Other	other
0.299	7.143	0.000812	1428479_at		NFATC1	nuclear factor of activated T-cells, cytoplasmic, calcineurin-dependent 1	Nucleus	transcription regulator
0.297	9.977	0.000307	1418050_at		GPLD1	glycosylphosphatidylinositol specific phospholipase D1	Cytoplasm	enzyme
0.297	8.997	0.00115	1451714_a_at		MAP2K3	mitogen-activated protein kinase kinase 3	Cytoplasm	kinase
0.296	9.868	0.00426	1454086_a_at		LMO2	LIM domain only 2 (rhombotin-like 1)	Nucleus	other
0.294	10.057	0.00181	1448791_at		SNX5	sorting nexin 5	Cytoplasm	transporter
0.293	9.96	0.00175	1431012_a_at		ECI2	enoyl-CoA delta isomerase 2	Cytoplasm	enzyme
0.293	9.567	0.000395	1448354_at		G6PD	glucose-6-phosphate dehydrogenase	Cytoplasm	enzyme
0.293	9.594	0.00585	1454731_at		MYO10	myosin X	Cytoplasm	other
0.292	12.017	0.000262	1424146_at		GPR37L1	G protein-coupled receptor 37 like 1	Plasma Membrane	G-protein coupled receptor
0.291	9.225	0.00044	1433722_at		AKAP13	A kinase (PRKA) anchor protein 13	Cytoplasm	other
0.291	10.421	0.000841	1434727_at		HEPACAM	hepatic and glial cell adhesion molecule	Plasma Membrane	other
0.291	8.14	5.3e-05	1418164_at		STX2	syntaxin 2	Cytoplasm	transporter
0.287	6.286	0.00463	1422747_at		CHEK2	checkpoint kinase 2	Nucleus	kinase
0.287	9.72	0.00587	1448694_at	D	JUN	jun proto-oncogene	Nucleus	transcription regulator
0.287	7.817	2.93e-05	1416584_at		MAN2B2	mannosidase, alpha, class 2B, member 2	Cytoplasm	enzyme
0.287	11.247	0.0014	1448411_at		WFS1	Wolfram syndrome 1 (wolframin)	Cytoplasm	enzyme
0.286	6.528	0.000648	1449130_at		CD1D	CD1d molecule	Plasma Membrane	other
0.286	6.833	0.00421	1420873_at	D	TWF1	twinfilin actin-binding protein 1	Cytoplasm	kinase
0.285	9.2	0.000424	1454222_a_at		CCDC13	coiled-coil domain containing 13	Other	other
0.285	6.693	0.00399	1450117_at		TCF7L1	transcription factor 7-like 1 (T-cell specific, HMG-box)	Nucleus	transcription regulator
0.283	7.179	0.000328	1429219_at		IKBIP	IKBKB interacting protein	Cytoplasm	other
0.283	8.514	0.00466	1423937_at	D	KCTD5	potassium channel tetramerization domain containing 5	Cytoplasm	other
0.283	10.972	0.000525	1429265_a_at		RNF130	ring finger protein 130	Cytoplasm	peptidase
0.282	7.4	0.006	1439787_at		P2RX7	purinergic receptor P2X, ligand-gated ion channel, 7	Plasma Membrane	ion channel
0.282	7.353	0.00467	1452191_at		PRCP	prolylcarboxypeptidase (angiotensinase C)	Cytoplasm	peptidase
0.282	10.418	0.000264	1438001_x_at	D	REEP5	receptor accessory protein 5	Extracellular Space	transporter
0.281	8.305	0.00145	1426623_a_at		ARHGAP17	Rho GTPase activating protein 17	Cytoplasm	other
0.28	13.029	0.000105	1435148_at	D	ATP1B2	ATPase, Na+/K+ transporting, beta 2 polypeptide	Plasma Membrane	transporter
0.28	9.304	0.000105	1460234_at		WDR81	WD repeat domain 81	Plasma Membrane	other
0.277	8.717	0.00348	1455994_x_at	D	ELOVL1	ELOVL fatty acid elongase 1	Cytoplasm	enzyme
0.277	8.688	0.000105	1448550_at		LBP	lipopolysaccharide binding protein	Plasma Membrane	transporter
0.277	8.2	0.00607	1418289_at		Nes	nestin	Cytoplasm	other
0.275	10.999	0.00155	1448655_at		LRP1	low density lipoprotein receptor-related protein 1	Plasma Membrane	transmembrane receptor
0.275	6.983	0.00457	1441320_a_at		TRIM56	tripartite motif containing 56	Cytoplasm	enzyme
0.275	10.275	0.000214	1455719_at		TUBB	tubulin, beta class I	Cytoplasm	other	ixabepilone, colchicine/probenecid, brentuximab vedotin, cabazitaxel, 6-mercaptopurine/methotrexate/prednisone/vincristine, dexamethasone/doxorubicin/vincristine, gemcitabine/vinorelbine, irinotecan/vincristine, trastuzumab/vinorelbine, methotrexate/vinorelbine, vinorelbine, vincristine, podophyllotoxin, colchicine
0.274	7.523	0.00137	1422327_s_at		G6pd2	glucose-6-phosphate dehydrogenase 2	Other	enzyme
0.274	9.209	0.00254	1450048_a_at		IDH2	isocitrate dehydrogenase 2 (NADP+), mitochondrial	Cytoplasm	enzyme
0.274	7.655	0.000566	1418891_a_at	D	RAB3D	RAB3D, member RAS oncogene family	Cytoplasm	enzyme
0.273	10.205	0.000186	1448987_at		ACADL	acyl-CoA dehydrogenase, long chain	Cytoplasm	enzyme
0.272	9.677	0.000193	1452287_at		MSI1	musashi RNA-binding protein 1	Cytoplasm	other
0.271	10.089	0.00266	1434881_s_at		KCTD12	potassium channel tetramerization domain containing 12	Plasma Membrane	ion channel
0.269	6.181	0.00257	1437302_at		ADRB2	adrenoceptor beta 2, surface	Plasma Membrane	G-protein coupled receptor	articaine/epinephrine, bupivacaine/epinephrine, carteolol, dipivefrin, meluadrine, epinephrine/prilocaine, epinephrine/lidocaine, bedoradrine, KUL 7211, arformoterol, indacaterol, myogane, budesonide/formoterol, nebivolol, vilanterol, formoterol/mometasone furoate, glycopyrrolate/indacaterol, latanoprost/timolol, umeclidinium/vilanterol, fluticasone/salmeterol, albuterol/ipratropium, isoprenaline…
0.269	8.327	0.00152	1455339_at		FKBP15	FK506 binding protein 15, 133kDa	Plasma Membrane	enzyme
0.269	6.268	6.45e-05	1422707_at		PIK3CG	phosphatidylinositol-4,5-bisphosphate 3-kinase, catalytic subunit gamma	Cytoplasm	kinase	SF 1126, PX-866, dactolisib, 2-(1H-indazol-4-yl)-6-(4-methanesulfonylpiperazin-1-ylmethyl)-4-morpholin-4-ylthieno(3,2-d)pyrimidine, buparlisib, XL147
0.269	10.803	0.00172	1416165_at		RAB31	RAB31, member RAS oncogene family	Cytoplasm	enzyme
0.268	7.124	0.00203	1417566_at		ABHD5	abhydrolase domain containing 5	Cytoplasm	enzyme
0.268	8.373	0.00387	1416205_at		GLB1	galactosidase, beta 1	Cytoplasm	enzyme
0.268	5.991	0.00221	1433626_at		PLSCR4	phospholipid scramblase 4	Plasma Membrane	enzyme
0.268	8.545	0.00081	1424603_at		SUMF1	sulfatase modifying factor 1	Cytoplasm	other
0.267	8.898	0.00317	1448677_at		EMC8	ER membrane protein complex subunit 8	Cytoplasm	other
0.267	12.421	7.06e-05	1437005_a_at	D	RPL18	ribosomal protein L18	Cytoplasm	other
0.266	10.89	0.00085	1416735_at		ASAH1	N-acylsphingosine amidohydrolase (acid ceramidase) 1	Cytoplasm	enzyme
0.266	6.596	0.0011	1439880_at		C2orf80	chromosome 2 open reading frame 80	Other	other
0.265	8.015	0.00337	1423425_at		PLBD2	phospholipase B domain containing 2	Extracellular Space	other
0.265	9.265	0.000738	1460053_at		SMYD4	SET and MYND domain containing 4	Other	other
0.264	9.901	0.000113	1422511_a_at	D	OGFR	opioid growth factor receptor	Plasma Membrane	other	enkephalin, methionine
0.264	10.1	0.000611	1416167_at		PRDX4	peroxiredoxin 4	Cytoplasm	enzyme
0.264	8.88	0.00407	1426084_a_at		TOR1AIP1	torsin A interacting protein 1	Nucleus	other
0.262	7.587	0.00611	1419435_at		AOX1	aldehyde oxidase 1	Cytoplasm	enzyme
0.262	8.209	0.000267	1456888_at		PFKFB4	6-phosphofructo-2-kinase/fructose-2,6-biphosphatase 4	Cytoplasm	kinase
0.262	9.03	0.000375	1436337_at		TMEM243	transmembrane protein 243, mitochondrial	Other	other
0.261	9.19	0.00215	1423067_at		CDK5RAP3	CDK5 regulatory subunit associated protein 3	Nucleus	other
0.261	8.368	8.07e-05	1416457_at		DDAH2	dimethylarginine dimethylaminohydrolase 2	Cytoplasm	enzyme
0.261	12.687	5.69e-05	1415880_a_at		LAMP1	lysosomal-associated membrane protein 1	Plasma Membrane	other
0.261	9.346	0.00144	1417818_at	D	WWTR1	WW domain containing transcription regulator 1	Nucleus	transcription regulator
0.26	9.201	0.00164	1454895_at		CYB561A3	cytochrome b561 family, member A3	Cytoplasm	other
0.26	8.001	0.000643	1452582_at		GALM	galactose mutarotase (aldose 1-epimerase)	Cytoplasm	enzyme
0.26	8.937	0.00432	1452823_at		GSTK1	glutathione S-transferase kappa 1	Cytoplasm	enzyme
0.259	11.195	0.00204	1429318_a_at		QKI	QKI, KH domain containing, RNA binding	Nucleus	other
0.259	9.197	0.00303	1434585_at		TULP4	tubby like protein 4	Cytoplasm	transcription regulator
0.258	8.85	0.00189	1435254_at		PLXNB1	plexin B1	Plasma Membrane	transmembrane receptor
0.257	6.987	0.00131	1435036_at		ASPG	asparaginase	Other	enzyme
0.257	9.113	0.00449	1454736_at		SOWAHC	sosondowah ankyrin repeat domain family member C	Nucleus	transcription regulator
0.255	8.816	0.000991	1418103_at		SLC12A9	solute carrier family 12, member 9	Plasma Membrane	transporter
0.255	10.372	0.00311	1416635_at		SMPDL3A	sphingomyelin phosphodiesterase, acid-like 3A	Extracellular Space	enzyme
0.255	9.591	0.00582	1428922_at		TRIL	TLR4 interactor with leucine-rich repeats	Other	other
0.254	8.73	0.00081	1417764_at		SSR1	signal sequence receptor, alpha	Cytoplasm	other
0.253	6.791	0.00246	1434837_at		MDC1	mediator of DNA-damage checkpoint 1	Nucleus	other
0.253	8.825	0.00224	1424174_at		SHKBP1	SH3KBP1 binding protein 1	Other	other
0.253	9.255	7.29e-05	1448255_a_at	D	SURF4	surfeit 4	Cytoplasm	other
0.252	11.473	0.000367	1427418_a_at		HIF1A	hypoxia inducible factor 1, alpha subunit (basic helix-loop-helix transcription factor)	Nucleus	transcription regulator
0.252	9.183	0.00422	1448647_at		MAN2A1	mannosidase, alpha, class 2A, member 1	Cytoplasm	enzyme
0.252	10.843	0.000578	1450027_at		SDC3	syndecan 3	Plasma Membrane	other
0.251	9.493	0.0017	1451987_at		ARRB2	arrestin, beta 2	Cytoplasm	other
0.251	8.139	0.00189	1423695_at		EDEM2	ER degradation enhancer, mannosidase alpha-like 2	Cytoplasm	enzyme
0.251	7.492	0.00452	1455314_at		LPP	LIM domain containing preferred translocation partner in lipoma	Nucleus	other
0.251	8.796	0.00189	1423086_at		NPC1	Niemann-Pick disease, type C1	Cytoplasm	transporter
0.25	8.887	0.00244	1435552_at	D	OTUD7B	OTU deubiquitinase 7B	Cytoplasm	peptidase
0.25	8.528	0.00355	1433821_at		Tmem198b	transmembrane protein 198b	Other	other
0.248	9.598	0.000301	1416634_at	D	FAM96A	family with sequence similarity 96, member A	Extracellular Space	other
0.247	8.736	0.0029	1449839_at		CASP3	caspase 3, apoptosis-related cysteine peptidase	Cytoplasm	peptidase	emricasan
0.247	6.542	0.00573	1430353_at		GLIS3	GLIS family zinc finger 3	Nucleus	transcription regulator
0.247	6.76	0.00555	1433893_s_at		SPAG5	sperm associated antigen 5	Nucleus	peptidase
0.246	9.082	0.00576	1453173_at		Akr1b10	aldo-keto reductase family 1, member B10 (aldose reductase)	Cytoplasm	enzyme
0.246	6.304	0.00462	1418201_at		PLEKHG2	pleckstrin homology domain containing, family G (with RhoGef domain) member 2	Cytoplasm	other
0.245	10.188	0.0013	1436349_at		C11orf31	chromosome 11 open reading frame 31	Nucleus	other
0.245	8.338	0.00132	1428404_at		FBRSL1	fibrosin-like 1	Nucleus	other
0.244	10.95	0.00104	1438654_x_at		MMD2	monocyte to macrophage differentiation-associated 2	Other	other
0.244	9.164	0.000307	1417722_at		PGLS	6-phosphogluconolactonase	Cytoplasm	enzyme
0.244	11.071	0.000641	1437649_x_at	D	PPIB	peptidylprolyl isomerase B (cyclophilin B)	Cytoplasm	enzyme
0.242	8.034	0.00228	1418838_at		ABCD1	ATP-binding cassette, sub-family D (ALD), member 1	Plasma Membrane	transporter
0.241	7.017	0.000269	1426818_at		ARRDC4	arrestin domain containing 4	Other	other
0.241	9.472	0.00447	1422490_at		BNIP2	BCL2/adenovirus E1B 19kDa interacting protein 2	Cytoplasm	other
0.241	6.985	0.00223	1419172_at		DHFR	dihydrofolate reductase	Nucleus	enzyme	pyrimethamine, trimethoprim, iclaprim, proguanil, methotrexate/ofatumumab, methotrexate/sirolimus/tacrolimus, pralatrexate, abatacept/methotrexate, infliximab/methotrexate, methotrexate/rituximab, 6-mercaptopurine/methotrexate/prednisone/vincristine, golimumab/methotrexate, cisplatin/doxorubicin/methotrexate, cytarabine/methotrexate, cisplatin/doxorubicin/ifosfamide/methotrexate, methotrexate/rit…
0.241	9.32	0.0013	1426812_a_at		FAM129B	family with sequence similarity 129, member B	Cytoplasm	other
0.239	6.662	0.00114	1418910_at		BMP7	bone morphogenetic protein 7	Extracellular Space	growth factor
0.239	9.852	0.00379	1416762_at	D	S100A10	S100 calcium binding protein A10	Cytoplasm	other
0.237	6.653	0.00353	1424981_at		NLN	neurolysin (metallopeptidase M3 family)	Cytoplasm	peptidase
0.236	10.073	0.00256	1415860_at		KPNA2	karyopherin alpha 2 (RAG cohort 1, importin alpha 1)	Nucleus	transporter
0.236	8.153	0.00302	1425585_at		MED12	mediator complex subunit 12	Nucleus	transcription regulator
0.236	9.121	8.42e-05	1435141_at		SFT2D2	SFT2 domain containing 2	Cytoplasm	other
0.236	7.406	0.0036	1451486_at		SLC46A3	solute carrier family 46, member 3	Extracellular Space	other
0.236	8.412	0.00307	1427049_s_at		SMO	smoothened, frizzled class receptor	Plasma Membrane	G-protein coupled receptor	vismodegib, gemcitabine/vismodegib, erlotinib/vismodegib
0.235	8.377	0.00219	1416553_at		STRA13	stimulated by retinoic acid 13	Nucleus	other
0.234	4.345	0.00264	1430886_at		C10orf11	chromosome 10 open reading frame 11	Other	other
0.234	9.545	0.000924	1435446_a_at		CHPT1	choline phosphotransferase 1	Cytoplasm	enzyme
0.234	8.162	0.00527	1424831_at		CPNE2	copine II	Other	other
0.233	9.472	0.00138	1424184_at		ACADVL	acyl-CoA dehydrogenase, very long chain	Cytoplasm	enzyme
0.233	13.439	6.46e-05	1437458_x_at	D	CLU	clusterin	Cytoplasm	other
0.233	11.477	0.000162	1450649_at		GNG10	guanine nucleotide binding protein (G protein), gamma 10	Plasma Membrane	enzyme
0.233	9.138	0.00109	1450984_at	D	TJP2	tight junction protein 2	Plasma Membrane	kinase
0.232	6.716	0.000212	1449823_at		DACH2	dachshund family transcription factor 2	Nucleus	other
0.232	7.155	0.00455	1427147_at		MMS22L	MMS22-like, DNA repair protein	Nucleus	other
0.232	9.327	0.0021	1426972_at		SEC24D	SEC24 family member D	Cytoplasm	transporter
0.231	10.478	0.001	1420820_at		MYL12B	myosin, light chain 12B, regulatory	Cytoplasm	other
0.231	8.771	0.00198	1423549_at	D	SLC1A4	solute carrier family 1 (glutamate/neutral amino acid transporter), member 4	Plasma Membrane	transporter	riluzole
0.23	7.628	0.000814	1437745_at		CHD7	chromodomain helicase DNA binding protein 7	Nucleus	enzyme
0.23	12.833	0.00083	1418883_a_at		PABPC1	poly(A) binding protein, cytoplasmic 1	Cytoplasm	translation regulator
0.23	7.739	0.00404	1453283_at		PGM2	phosphoglucomutase 2	Cytoplasm	enzyme
0.229	9.967	0.000215	1422758_at		CHST2	carbohydrate (N-acetylglucosamine-6-O) sulfotransferase 2	Cytoplasm	enzyme
0.229	11.302	0.00146	1455333_at		TNS3	tensin 3	Plasma Membrane	phosphatase
0.229	7.415	0.00217	1456624_at	D	WIPI1	WD repeat domain, phosphoinositide interacting 1	Cytoplasm	other
0.228	10.469	0.00477	1451075_s_at		CTDSP2	CTD (carboxy-terminal domain, RNA polymerase II, polypeptide A) small phosphatase 2	Nucleus	phosphatase
0.228	8.742	0.00616	1451562_at		GGACT	gamma-glutamylamine cyclotransferase	Other	enzyme
0.228	11.704	0.00217	1417947_at		PCNA	proliferating cell nuclear antigen	Nucleus	enzyme
0.228	8.098	0.00144	1456694_x_at		PTPN6	protein tyrosine phosphatase, non-receptor type 6	Cytoplasm	phosphatase
0.228	13.756	0.000256	1452141_a_at		SEPP1	selenoprotein P, plasma, 1	Extracellular Space	other
0.227	9.287	0.00267	1428351_at		PPM1M	protein phosphatase, Mg2+/Mn2+ dependent, 1M	Nucleus	phosphatase
0.226	10.2	0.000176	1448491_at		ECH1	enoyl CoA hydratase 1, peroxisomal	Cytoplasm	enzyme
0.226	12.632	0.000489	1453118_s_at	D	RPL22	ribosomal protein L22	Nucleus	other
0.226	11.178	0.000504	1448524_s_at		SSR4	signal sequence receptor, delta	Cytoplasm	other
0.225	8.221	0.00063	1423092_at	D	INCENP	inner centromere protein antigens 135/155kDa	Nucleus	other
0.225	12.383	0.000715	1421813_a_at	D	PSAP	prosaposin	Extracellular Space	other
0.225	8.006	0.000757	1424138_at		RHBDF1	rhomboid 5 homolog 1 (Drosophila)	Other	other
0.224	10.906	0.00552	1427004_at		FBXO2	F-box protein 2	Cytoplasm	enzyme
0.223	8.767	0.00281	1416046_a_at		FUCA2	fucosidase, alpha-L- 2, plasma	Extracellular Space	enzyme
0.223	9.412	0.00089	1426657_s_at	D	PHGDH	phosphoglycerate dehydrogenase	Cytoplasm	enzyme
0.223	11.553	0.00321	1448313_at	D	TPP1	tripeptidyl peptidase I	Cytoplasm	peptidase
0.222	7.667	0.00412	1445647_at		AI447881	expressed sequence AI447881	Other	other
0.222	9.431	0.00214	1424762_at		C1QTNF5	C1q and tumor necrosis factor related protein 5	Plasma Membrane	transmembrane receptor
0.222	7.625	0.00366	1427441_a_at	D	SUCLG2	succinate-CoA ligase, GDP-forming, beta subunit	Cytoplasm	enzyme
0.221	6.627	0.00442	1418991_at		BAK1	BCL2-antagonist/killer 1	Cytoplasm	other
0.22	9.442	0.00519	1436569_at		PREX2	phosphatidylinositol-3,4,5-trisphosphate-dependent Rac exchange factor 2	Cytoplasm	other
0.22	11.782	0.000657	1437628_s_at	D	RHOA	ras homolog family member A	Cytoplasm	enzyme
0.219	6.115	0.00362	1452796_at		DEF6	differentially expressed in FDCP 6 homolog (mouse)	Extracellular Space	other
0.218	8.79	0.000493	1449043_at		NAGA	N-acetylgalactosaminidase, alpha-	Cytoplasm	enzyme
0.218	7.4	0.000551	1427103_at		PLEKHO2	pleckstrin homology domain containing, family O member 2	Cytoplasm	other
0.218	10.788	0.00054	1424674_at		SLC39A6	solute carrier family 39 (zinc transporter), member 6	Plasma Membrane	transporter
0.217	7.439	0.000482	1425491_at	D	BMPR1A	bone morphogenetic protein receptor, type IA	Plasma Membrane	kinase
0.217	8.806	0.00439	1434424_at		FLVCR1	feline leukemia virus subgroup C cellular receptor 1	Plasma Membrane	transporter
0.217	12.321	0.00243	1436840_x_at	D	RPL35	ribosomal protein L35	Cytoplasm	other
0.217	11.597	0.00571	1415700_a_at		SSR3	signal sequence receptor, gamma (translocon-associated protein gamma)	Cytoplasm	other
0.216	7.727	0.00245	1434482_at		SZRD1	SUZ RNA binding domain containing 1	Other	other
0.215	6.173	0.00239	1450658_at		ADAMTS5	ADAM metallopeptidase with thrombospondin type 1 motif, 5	Extracellular Space	peptidase
0.215	8.513	0.00377	1423237_at		GALNT1	polypeptide N-acetylgalactosaminyltransferase 1	Cytoplasm	enzyme
0.214	8.802	0.000374	1426238_at		BMP1	bone morphogenetic protein 1	Extracellular Space	peptidase
0.214	8.759	0.00516	1426434_at		TMEM43	transmembrane protein 43	Nucleus	other
0.213	9.201	0.000678	1417630_at		MKNK1	MAP kinase interacting serine/threonine kinase 1	Cytoplasm	kinase
0.212	7.387	0.00563	1452301_at		ALDH3B1	aldehyde dehydrogenase 3 family, member B1	Cytoplasm	enzyme
0.212	9.417	0.00163	1455308_at	D	ANO6	anoctamin 6	Plasma Membrane	ion channel
0.212	10.868	0.00155	1415724_a_at	D	Cdc42	cell division cycle 42	Plasma Membrane	enzyme
0.212	8.458	0.00572	1417841_at		PXMP2	peroxisomal membrane protein 2, 22kDa	Cytoplasm	other
0.212	10.356	0.00104	1429321_at		RNF149	ring finger protein 149	Other	enzyme
0.211	9.668	0.00242	1417432_a_at		GNB1	guanine nucleotide binding protein (G protein), beta polypeptide 1	Plasma Membrane	enzyme
0.211	7.54	0.000497	1417146_at		MRI1	methylthioribose-1-phosphate isomerase 1	Cytoplasm	translation regulator
0.211	7.919	0.00256	1417237_at		PLD2	phospholipase D2	Cytoplasm	enzyme
0.21	10.317	0.0035	1437099_x_at		HNRNPF	heterogeneous nuclear ribonucleoprotein F	Nucleus	other
0.21	8.551	0.00564	1427334_s_at		KIAA1551	KIAA1551	Other	other
0.21	11.29	0.000659	1428107_at		SH3BGRL	SH3 domain binding glutamate-rich protein like	Cytoplasm	other
0.21	7.385	0.000907	1449677_s_at		TMEM38B	transmembrane protein 38B	Nucleus	ion channel
0.209	10.187	0.000527	1425616_a_at		CCDC23	coiled-coil domain containing 23	Other	other
0.209	12.178	0.00182	1416937_at		GABARAP	GABA(A) receptor-associated protein	Cytoplasm	transporter
0.209	9.737	0.00397	1422662_at		LGALS8	lectin, galactoside-binding, soluble, 8	Extracellular Space	other
0.209	6.788	0.0024	1449477_s_at		SLC2A10	solute carrier family 2 (facilitated glucose transporter), member 10	Plasma Membrane	transporter
0.209	10.597	0.00184	1419494_a_at	D	TPD52	tumor protein D52	Cytoplasm	other
0.209	9.226	0.00347	1419584_at		TTC28	tetratricopeptide repeat domain 28	Cytoplasm	other
0.208	9.715	0.00361	1448765_at		FYN	FYN oncogene related to SRC, FGR, YES	Plasma Membrane	kinase	dasatinib
0.208	7.709	0.000974	1425045_at		JMJD7	jumonji domain containing 7	Other	other
0.208	8.355	0.00432	1451176_at		MAVS	mitochondrial antiviral signaling protein	Cytoplasm	other
0.208	11.474	0.00346	1416406_at		PEA15	phosphoprotein enriched in astrocytes 15	Cytoplasm	transporter
0.208	9.54	0.0044	1423108_at		SLC25A20	solute carrier family 25 (carnitine/acylcarnitine translocase), member 20	Cytoplasm	transporter
0.208	10.899	0.00153	1448388_a_at		SPTSSA	serine palmitoyltransferase, small subunit A	Cytoplasm	other
0.207	10.327	0.00471	1448919_at		CD302	CD302 molecule	Plasma Membrane	transmembrane receptor
0.207	8.795	0.00378	1424359_at		OPLAH	5-oxoprolinase (ATP-hydrolysing)	Cytoplasm	enzyme
0.207	8.219	0.00158	1424876_s_at		Spg20	spastic paraplegia 20, spartin (Troyer syndrome) homolog (human)	Other	other
0.206	9.641	0.00144	1423955_a_at		CERS2	ceramide synthase 2	Nucleus	transcription regulator
0.206	7.228	0.00465	1448014_s_at		USP24	ubiquitin specific peptidase 24	Other	peptidase
0.205	9.186	0.00398	1437829_s_at	D	EEF2K	eukaryotic elongation factor-2 kinase	Cytoplasm	kinase
0.205	5.144	0.00253	1425714_a_at		NFAM1	NFAT activating protein with ITAM motif 1	Plasma Membrane	transmembrane receptor
0.204	12.153	0.000291	1435897_at		Rpl32	ribosomal protein L32	Cytoplasm	other
0.203	9.953	0.00306	1435542_s_at		CTTNBP2NL	CTTNBP2 N-terminal like	Cytoplasm	other
0.203	9.871	0.00212	1419829_a_at		GAB2	GRB2-associated binding protein 2	Cytoplasm	other
0.203	7.997	0.00129	1421385_a_at		MYO7A	myosin VIIA	Cytoplasm	enzyme
0.202	10.912	0.00148	1427060_at		MAPK3	mitogen-activated protein kinase 3	Cytoplasm	kinase
0.201	7.219	0.00402	1452474_a_at		ART3	ADP-ribosyltransferase 3	Plasma Membrane	enzyme
0.201	9.748	0.00156	1416903_at		NUCB1	nucleobindin 1	Cytoplasm	other
0.2	8.523	0.00122	1422460_at		MAD2L1	MAD2 mitotic arrest deficient-like 1 (yeast)	Nucleus	other
0.2	9.614	0.00472	1419536_a_at		RELA	v-rel avian reticuloendotheliosis viral oncogene homolog A	Nucleus	transcription regulator	NF-kappaB decoy
0.199	9.172	0.00237	1424438_a_at		LEPROT	leptin receptor overlapping transcript	Plasma Membrane	other
0.198	7.955	0.00108	1417446_at		SLC12A4	solute carrier family 12 (potassium/chloride transporter), member 4	Plasma Membrane	transporter	bumetanide
0.197	6.102	0.00291	1421709_a_at		FMO5	flavin containing monooxygenase 5	Cytoplasm	enzyme
0.196	8.432	0.00193	1424194_at		RCSD1	RCSD domain containing 1	Other	other
0.195	11.025	0.00304	1416766_at		MARC2	mitochondrial amidoxime reducing component 2	Cytoplasm	enzyme
0.195	8.015	0.000287	1417300_at		SMPDL3B	sphingomyelin phosphodiesterase, acid-like 3B	Extracellular Space	enzyme
0.194	8.278	0.00286	1444508_s_at		ARRDC1	arrestin domain containing 1	Cytoplasm	other
0.194	12.457	0.00193	1455168_a_at		GNB2L1	guanine nucleotide binding protein (G protein), beta polypeptide 2-like 1	Cytoplasm	enzyme
0.194	8.366	0.00496	1455739_at		TPBGL	trophoblast glycoprotein-like	Other	other
0.193	8.922	0.00277	1424905_a_at		SLC39A11	solute carrier family 39, member 11	Other	transporter
0.191	9.059	0.00132	1429648_at		SLC35A3	solute carrier family 35 (UDP-N-acetylglucosamine (UDP-GlcNAc) transporter), member A3	Cytoplasm	transporter
0.191	14.051	0.000457	1415906_at		Tmsb4x (includes others)	thymosin, beta 4, X chromosome	Cytoplasm	other
0.19	9.407	0.00229	1418970_a_at		BCL10	B-cell CLL/lymphoma 10	Cytoplasm	transcription regulator
0.19	10.486	0.00224	1416632_at		ME1	malic enzyme 1, NADP(+)-dependent, cytosolic	Cytoplasm	enzyme
0.19	12.263	0.00342	1448808_a_at		NME2	NME/NM23 nucleoside diphosphate kinase 2	Nucleus	kinase
0.19	12.412	0.00107	1435712_a_at	D	RPS18	ribosomal protein S18	Cytoplasm	other
0.189	9.043	0.0054	1452055_at		CTDSP1	CTD (carboxy-terminal domain, RNA polymerase II, polypeptide A) small phosphatase 1	Nucleus	phosphatase
0.189	10.92	0.000716	1447320_x_at	D	POLR1D	polymerase (RNA) I polypeptide D, 16kDa	Nucleus	enzyme
0.188	12.3	0.00141	1426162_a_at	D	RPL7	ribosomal protein L7	Nucleus	transcription regulator
0.188	9.484	0.00581	1416638_at		SALL2	spalt-like transcription factor 2	Nucleus	transcription regulator
0.187	8.914	0.00138	1452233_at		ABCC1	ATP-binding cassette, sub-family C (CFTR/MRP), member 1	Plasma Membrane	transporter	sulfinpyrazone
0.187	12.145	0.00117	1448344_at	D	RPS12	ribosomal protein S12	Cytoplasm	other
0.184	9.092	0.00198	1421075_s_at		CYP7B1	cytochrome P450, family 7, subfamily B, polypeptide 1	Cytoplasm	enzyme
0.183	10.047	0.0037	1429104_at		LIMD2	LIM domain containing 2	Other	other
0.182	11.334	0.00251	1433504_at		PYGB	phosphorylase, glycogen; brain	Cytoplasm	enzyme
0.181	13.249	0.00131	1416276_a_at		RPS4Y1	ribosomal protein S4, Y-linked 1	Cytoplasm	other
0.18	10.344	0.00254	1449244_at		CDH2	cadherin 2, type 1, N-cadherin (neuronal)	Plasma Membrane	other	N-ac-CHAVC-NH2
0.18	7.096	0.00484	1452021_a_at		HES6	hes family bHLH transcription factor 6	Nucleus	transcription regulator
0.18	9.297	0.00525	1437869_at		PPP2R3A	protein phosphatase 2, regulatory subunit B'', alpha	Nucleus	phosphatase
0.18	12.486	0.00135	1433689_s_at		RPS9	ribosomal protein S9	Cytoplasm	translation regulator
0.179	8.91	0.00548	1437586_at		CNOT4	CCR4-NOT transcription complex, subunit 4	Cytoplasm	enzyme
0.179	8.688	0.00548	1419183_at		PAPD4	PAP associated domain containing 4	Nucleus	enzyme
0.179	12.315	0.00261	1455319_x_at		RPS8	ribosomal protein S8	Cytoplasm	other
0.177	9.626	0.00602	1438760_x_at		ADAM15	ADAM metallopeptidase domain 15	Plasma Membrane	peptidase
0.177	10.918	0.00155	1423462_at		TAB2	TGF-beta activated kinase 1/MAP3K7 binding protein 2	Cytoplasm	other
0.174	8.066	0.00152	1418583_at		HINT3	histidine triad nucleotide binding protein 3	Other	other
0.174	10.543	0.00595	1449942_a_at		ILK	integrin-linked kinase	Plasma Membrane	kinase
0.174	11.993	0.00111	1448903_at		SEP15	15 kDa selenoprotein	Cytoplasm	enzyme
0.172	10.857	0.00613	1423570_at		ABCG1	ATP-binding cassette, sub-family G (WHITE), member 1	Plasma Membrane	transporter
0.172	9.644	0.00122	1448668_a_at		IRAK1	interleukin-1 receptor-associated kinase 1	Plasma Membrane	kinase
0.172	12.274	0.00329	1415912_a_at		RPS13	ribosomal protein S13	Other	other
0.172	7.766	0.00217	1452440_at		TNFSF12	tumor necrosis factor (ligand) superfamily, member 12	Extracellular Space	cytokine
0.171	12.866	0.00112	1415876_a_at		RPS26	ribosomal protein S26	Cytoplasm	other
0.17	13.321	0.000794	1422613_a_at		RPL7A	ribosomal protein L7a	Cytoplasm	other
0.169	8.445	0.00113	1426754_x_at	D	CKAP4	cytoskeleton-associated protein 4	Cytoplasm	other
0.169	9.758	0.00167	1423992_at		GATAD2A	GATA zinc finger domain containing 2A	Nucleus	transcription regulator
0.168	7.069	0.00578	1427434_at		Naip5 (includes others)	NLR family, apoptosis inhibitory protein 5	Other	other
0.167	12.966	0.00412	1416330_at		CD81	CD81 molecule	Plasma Membrane	other
0.166	10.948	0.00444	1453960_a_at		CAPZB	capping protein (actin filament) muscle Z-line, beta	Cytoplasm	other
0.165	10.771	0.00432	1449643_s_at		BTF3	basic transcription factor 3	Nucleus	transcription regulator
0.165	9.177	0.00349	1415797_at		DDR1	discoidin domain receptor tyrosine kinase 1	Plasma Membrane	kinase	nilotinib
0.164	12.843	0.00253	1417452_a_at		FAU	Finkel-Biskis-Reilly murine sarcoma virus (FBR-MuSV) ubiquitously expressed	Cytoplasm	other
0.164	12.72	0.0043	1438626_x_at		RPL14	ribosomal protein L14	Cytoplasm	other
0.164	10.621	0.00387	1418896_a_at		RPN2	ribophorin II	Cytoplasm	enzyme
0.163	7.831	0.00191	1424416_at		NKIRAS2	NFKB inhibitor interacting Ras-like 2	Cytoplasm	enzyme
0.163	11.237	0.00425	1424684_at		RAB5C	RAB5C, member RAS oncogene family	Cytoplasm	enzyme
0.162	10.29	0.00583	1451703_s_at		APRT	adenine phosphoribosyltransferase	Cytoplasm	enzyme
0.162	7.638	0.00358	1455658_at		CGGBP1	CGG triplet repeat binding protein 1	Nucleus	other
0.162	10.295	0.003	1436950_at		CRKL	v-crk avian sarcoma virus CT10 oncogene homolog-like	Cytoplasm	kinase
0.161	12.205	0.0039	1449243_a_at		RPS19	ribosomal protein S19	Cytoplasm	other
0.16	10.238	0.00266	1456867_x_at		ERGIC3	ERGIC and golgi 3	Cytoplasm	other
0.159	12.185	0.00441	1417825_at		ESD	esterase D	Cytoplasm	enzyme
0.159	10.954	0.00329	1422880_at		SYPL1	synaptophysin-like 1	Plasma Membrane	transporter
0.157	10.718	0.00578	1429022_at		ADCYAP1R1	adenylate cyclase activating polypeptide 1 (pituitary) receptor type I	Plasma Membrane	G-protein coupled receptor
0.157	8.968	0.00253	1417691_at		BIN3	bridging integrator 3	Cytoplasm	other
0.157	8.991	0.00203	1452272_a_at		GFER	growth factor, augmenter of liver regeneration	Nucleus	enzyme
0.157	9.484	0.00152	1455487_at		MFSD11	major facilitator superfamily domain containing 11	Other	other
0.157	12.65	0.00483	1417615_a_at		RPL11	ribosomal protein L11	Cytoplasm	other
0.157	7.723	0.00388	1435651_a_at		SMARCAD1	SWI/SNF-related, matrix-associated actin-dependent regulator of chromatin, subfamily a, containing DEAD/H box 1	Nucleus	enzyme
0.157	6.636	0.00487	1424784_at		ZNF616	zinc finger protein 616	Nucleus	other
0.156	12.316	0.00589	1456581_x_at		GDI2	GDP dissociation inhibitor 2	Cytoplasm	other
0.156	13.79	0.00367	1418000_a_at		ITM2B	integral membrane protein 2B	Plasma Membrane	other
0.155	9.851	0.00282	1417059_at		KRTCAP2	keratinocyte associated protein 2	Plasma Membrane	enzyme
0.155	13.101	0.0031	1428152_a_at		RPL18A	ribosomal protein L18a	Cytoplasm	other
0.153	9.743	0.00338	1449036_at		RNF128	ring finger protein 128, E3 ubiquitin protein ligase	Cytoplasm	enzyme
0.149	10.24	0.00418	1415870_at		CALU	calumenin	Cytoplasm	other
0.149	12.734	0.00361	1431177_a_at		RPL10A	ribosomal protein L10a	Nucleus	other
0.149	12.913	0.00396	1416054_at		RPS5	ribosomal protein S5	Cytoplasm	other
0.146	13.096	0.00569	1416546_a_at		RPL6	ribosomal protein L6	Cytoplasm	other
0.145	12.407	0.00227	1448252_a_at		EEF1B2	eukaryotic translation elongation factor 1 beta 2	Cytoplasm	translation regulator
0.144	10.672	0.00584	1431036_a_at		TMED2	transmembrane emp24 domain trafficking protein 2	Cytoplasm	transporter
0.142	10.563	0.00463	1423589_at		ARPC4	actin related protein 2/3 complex, subunit 4, 20kDa	Cytoplasm	other
0.133	10.443	0.005	1426974_at		OS9	osteosarcoma amplified 9, endoplasmic reticulum lectin	Nucleus	other
0.13	10.267	0.00482	1425029_a_at		MBOAT2	membrane bound O-acyltransferase domain containing 2	Cytoplasm	enzyme
0.129	13.63	0.00468	1423763_x_at		RPS28	ribosomal protein S28	Cytoplasm	other
-1.524	10.749	0.00422	1436387_at	D	HOMER1	homer homolog 1 (Drosophila)	Plasma Membrane	other
-1.323	7.396	0.000286	1459372_at		NPAS4	neuronal PAS domain protein 4	Nucleus	transcription regulator
-0.923	7.728	2.3e-05	1420437_at		IDO1	indoleamine 2,3-dioxygenase 1	Cytoplasm	enzyme
-0.914	7.352	0.000108	1449184_at		PGLYRP1	peptidoglycan recognition protein 1	Plasma Membrane	transmembrane receptor
-0.897	9.901	0.00452	1420720_at		NPTX2	neuronal pentraxin II	Extracellular Space	other
-0.882	9.15	0.000223	1422580_at		MYL4	myosin, light chain 4, alkali; atrial, embryonic	Cytoplasm	other
-0.879	6.121	0.00131	1436279_at		SLC26A7	solute carrier family 26 (anion exchanger), member 7	Plasma Membrane	transporter
-0.856	7.826	0.00154	1428923_at		PPP1R3G	protein phosphatase 1, regulatory subunit 3G	Cytoplasm	other
-0.851	9.972	0.000977	1422168_a_at	D	BDNF	brain-derived neurotrophic factor	Extracellular Space	growth factor
-0.846	8.857	0.00432	1437247_at		FOSL2	FOS-like antigen 2	Nucleus	transcription regulator
-0.826	9.783	0.00109	1423171_at		GPR88	G protein-coupled receptor 88	Plasma Membrane	G-protein coupled receptor
-0.798	8.545	6.58e-06	1452879_at		SYNPO2	synaptopodin 2	Cytoplasm	other
-0.797	9.157	7.97e-06	1438042_at	D	SHOX2	short stature homeobox 2	Nucleus	transcription regulator
-0.769	8.89	0.000723	1423804_a_at	D	IDI1	isopentenyl-diphosphate delta isomerase 1	Cytoplasm	enzyme
-0.765	10.056	0.000487	1448285_at	D	RGS4	regulator of G-protein signaling 4	Cytoplasm	other
-0.761	8.85	3.16e-05	1418370_at		TNNC1	troponin C type 1 (slow)	Cytoplasm	other	levosimendan, Ca2+
-0.746	7.539	0.000286	1417803_at	D	SPTSSB	serine palmitoyltransferase, small subunit B	Cytoplasm	other
-0.738	11.877	5.95e-05	1436329_at		EGR3	early growth response 3	Nucleus	transcription regulator
-0.735	10.193	0.000457	1418937_at	D	DIO2	deiodinase, iodothyronine, type II	Cytoplasm	enzyme
-0.73	7.792	1.16e-06	1428642_at		SLC35D3	solute carrier family 35, member D3	Other	other
-0.691	9.505	0.000845	1457984_at		CRH	corticotropin releasing hormone	Extracellular Space	cytokine
-0.683	9.148	3.26e-07	1417804_at	D	RASGRP2	RAS guanyl releasing protein 2 (calcium and DAG-regulated)	Cytoplasm	other
-0.652	9.03	6.44e-05	1423285_at		COCH	cochlin	Extracellular Space	other
-0.651	6.64	0.000333	1455740_at		Hnrnpa1	heterogeneous nuclear ribonucleoprotein A1	Nucleus	other
-0.64	8.923	7.97e-05	1418950_at		DRD2	dopamine receptor D2	Plasma Membrane	G-protein coupled receptor	paliperidone, risperidone, buspirone, carbidopa/entacapone/levodopa, bifeprunox, iloperidone, blonanserin, asenapine, pardoprunox, ocaperidone, abaperidone, methotrimeprazine, fluspirilene, SLV-314, cariprazine, rotigotine, acetophenazine, sultopride, zuclopenthixol, thioproperazine, lurasidone, opipramol, paliperidone palmitate, pipothiazine, carbidopa/levodopa, chloropromazine, domperidone, met…
-0.631	7.985	0.00134	1438355_at	D	SYNDIG1L	synapse differentiation inducing 1-like	Cytoplasm	other
-0.63	10.205	2.47e-05	1424475_at	D	CAMKK2	calcium/calmodulin-dependent protein kinase kinase 2, beta	Cytoplasm	kinase
-0.619	8.572	0.000188	1431394_a_at		LRRK2	leucine-rich repeat kinase 2	Cytoplasm	kinase
-0.616	9.448	0.000288	1420401_a_at		RAMP3	receptor (G protein-coupled) activity modifying protein 3	Plasma Membrane	transporter	pramlintide
-0.609	5.862	0.000124	1458320_at		ERICH6	glutamate-rich 6	Other	other
-0.598	8.313	0.00606	1451751_at	D	DDIT4L	DNA-damage-inducible transcript 4-like	Other	other
-0.592	8.331	0.00333	1458539_at	D	R3HDM1	R3H domain containing 1	Other	other
-0.588	6.129	0.00026	1445642_at		Lemd1	LEM domain containing 1	Other	other
-0.582	7.096	8.41e-07	1419542_at	D	DAZ2	deleted in azoospermia 2	Cytoplasm	translation regulator
-0.579	9.067	0.00403	1448860_at		REM2	RAS (RAD and GEM)-like GTP binding 2	Plasma Membrane	enzyme
-0.579	10.892	4.05e-05	1434008_at		SCN4B	sodium channel, voltage-gated, type IV, beta subunit	Plasma Membrane	ion channel	riluzole, zonisamide
-0.575	10.482	4.54e-06	1423152_at		VAPB	VAMP (vesicle-associated membrane protein)-associated protein B and C	Plasma Membrane	other
-0.567	8.083	0.00131	1438613_at		KCNA4	potassium voltage-gated channel, shaker-related subfamily, member 4	Plasma Membrane	ion channel	nicorandil, amiodarone, dalfampridine
-0.562	6.771	0.00145	1437877_at	D	TTC14	tetratricopeptide repeat domain 14	Other	other
-0.545	10.906	0.00388	1447669_s_at	D	GNG4	guanine nucleotide binding protein (G protein), gamma 4	Plasma Membrane	enzyme
-0.536	7.637	0.000925	1418322_at	D	CREM	cAMP responsive element modulator	Nucleus	transcription regulator
-0.533	11.495	0.000325	1439618_at	D	PDE10A	phosphodiesterase 10A	Cytoplasm	enzyme	aspirin/dipyridamole/telmisartan, triflusal, dipyridamole, aspirin/dipyridamole
-0.531	7.927	0.000568	1417109_at		TINAGL1	tubulointerstitial nephritis antigen-like 1	Extracellular Space	transporter
-0.527	8.609	0.00105	1423258_at		SYT9	synaptotagmin IX	Plasma Membrane	transporter
-0.526	7.629	0.00236	1439566_at		GPRIN3	GPRIN family member 3	Other	other
-0.526	12.37	2.11e-06	1449003_a_at		VTI1B	vesicle transport through interaction with t-SNAREs 1B	Plasma Membrane	transporter
-0.524	7.357	0.000505	1431717_at	D	AKAP5	A kinase (PRKA) anchor protein 5	Plasma Membrane	other
-0.523	6.352	0.000163	1449074_at		TEX40	testis expressed 40	Cytoplasm	other
-0.52	7.429	0.00526	1452205_x_at		Trbv1	T cell receptor beta, variable 1	Other	other
-0.519	10.006	0.000312	1418691_at		RGS9	regulator of G-protein signaling 9	Cytoplasm	enzyme
-0.515	11.473	0.00472	1423078_a_at		MSMO1	methylsterol monooxygenase 1	Cytoplasm	enzyme
-0.513	8.103	0.000208	1418534_at		FZD2	frizzled class receptor 2	Plasma Membrane	G-protein coupled receptor
-0.511	8.136	4.65e-05	1429741_at	D	KCNV1	potassium channel, subfamily V, member 1	Plasma Membrane	ion channel
-0.508	8.811	0.000375	1441101_at	D	HECW1	HECT, C2 and WW domain containing E3 ubiquitin protein ligase 1	Cytoplasm	enzyme
-0.507	8.68	0.00116	1423287_at		CBLN1	cerebellin 1 precursor	Cytoplasm	other
-0.503	12.427	0.00442	1433443_a_at	D	HMGCS1	3-hydroxy-3-methylglutaryl-CoA synthase 1 (soluble)	Cytoplasm	enzyme
-0.502	7.364	0.00268	1434458_at		FST	follistatin	Extracellular Space	other
-0.5	8.983	0.000611	1419606_a_at		TNNT1	troponin T type 1 (skeletal, slow)	Cytoplasm	other
-0.499	8.628	0.000446	1434760_at	D	LRRTM3	leucine rich repeat transmembrane neuronal 3	Other	other
-0.498	8.511	5.48e-05	1435162_at	D	PRKG2	protein kinase, cGMP-dependent, type II	Cytoplasm	kinase
-0.497	9.443	0.00211	1454784_at	D	HS3ST2	heparan sulfate (glucosamine) 3-O-sulfotransferase 2	Cytoplasm	enzyme
-0.495	8.774	8.46e-05	1418983_at	D	INADL	InaD-like (Drosophila)	Plasma Membrane	other
-0.494	6.937	0.000752	1439870_at	D	A330008L17Rik	RIKEN cDNA A330008L17 gene	Other	other
-0.494	8.577	0.000121	1425338_at	D	PLCB4	phospholipase C, beta 4	Cytoplasm	enzyme
-0.492	10.675	0.00042	1434962_x_at	D	Ccl27a	chemokine (C-C motif) ligand 27A	Extracellular Space	cytokine
-0.492	7.255	0.000322	1458882_at		SERPINB8	serpin peptidase inhibitor, clade B (ovalbumin), member 8	Cytoplasm	other
-0.491	9.537	1.79e-05	1449980_a_at		GABRD	gamma-aminobutyric acid (GABA) A receptor, delta	Plasma Membrane	ion channel	pagoclone, alphadolone, SEP 174559, nitrazepam, tracazolate, adinazolam, sevoflurane, isoflurane, gaboxadol, felbamate, etomidate, muscimol, halothane, fluoxetine/olanzapine, estazolam, eszopiclone, quazepam, diazepam, temazepam, zolpidem, lorazepam, olanzapine, triazolam, clonazepam, flurazepam, midazolam, oxazepam, zaleplon, secobarbital, phenobarbital, pentobarbital, ezogabine, desflurane, met…
-0.491	7.554	0.000389	1435125_at		PRIMA1	proline rich membrane anchor 1	Plasma Membrane	other
-0.488	8.599	0.000129	1443612_at		ANO3	anoctamin 3	Plasma Membrane	transporter
-0.487	9.155	0.000912	1440108_at	D	Foxp2	forkhead box P2	Nucleus	transcription regulator
-0.485	7.799	0.00146	1419845_at		Dlx1as	distal-less homeobox 1, antisense	Other	other
-0.485	7.885	0.00409	1434693_at		Gm10699	predicted gene 10699	Other	other
-0.48	8.815	0.000133	1438309_at	D	ACVR1C	activin A receptor, type IC	Plasma Membrane	kinase
-0.48	9.359	0.000163	1454906_at		RARB	retinoic acid receptor, beta	Nucleus	ligand-dependent nuclear receptor	etretinate, daunorubicin/tretinoin, idarubicin/tretinoin, doxorubicin/tretinoin, adapalene, isotretinoin, tazarotene, acitretin, tretinoin, tamibarotene, alitretinoin, fenretinide
-0.477	7.921	6.81e-05	1456640_at		SH3RF2	SH3 domain containing ring finger 2	Extracellular Space	other
-0.476	8.727	0.00602	1418715_at	D	PANK1	pantothenate kinase 1	Cytoplasm	kinase
-0.47	9.004	0.000135	1427229_at		HMGCR	3-hydroxy-3-methylglutaryl-CoA reductase	Cytoplasm	enzyme	aspirin/pravastatin, ezetimibe/fluvastatin, atorvastatin/niacin, atorvastatin/ezetimibe, ezetimibe/rosuvastatin, simvastatin/sitagliptin, choline fenofibrate/simvastatin, pitavastatin, lovastatin/niacin, ezetimibe/simvastatin, amlodipine/atorvastatin, fluvastatin, cerivastatin, atorvastatin, pravastatin, simvastatin, lovastatin, mevastatin, rosuvastatin
-0.469	9.317	0.00319	1428387_at		ACSL3	acyl-CoA synthetase long-chain family member 3	Cytoplasm	enzyme
-0.468	10.033	0.000291	1435553_at		PDZD2	PDZ domain containing 2	Plasma Membrane	other
-0.465	7.418	0.00359	1441666_at		LOC102639375	uncharacterized LOC102639375	Other	other
-0.464	9.808	0.002	1429428_at	D	TCF7L2	transcription factor 7-like 2 (T-cell specific, HMG-box)	Nucleus	transcription regulator
-0.463	9.191	6.17e-05	1459971_at		KCNT2	potassium channel, subfamily T, member 2	Plasma Membrane	ion channel
-0.463	9.362	6.2e-05	1426225_at		RBP4	retinol binding protein 4, plasma	Extracellular Space	transporter
-0.461	10.384	0.000908	1454768_at		KCNF1	potassium voltage-gated channel, subfamily F, member 1	Plasma Membrane	ion channel
-0.459	8.418	1.16e-05	1451917_a_at	D	DCLK1	doublecortin-like kinase 1	Other	kinase
-0.459	8.256	2.07e-05	1425870_a_at	D	KCNIP2	Kv channel interacting protein 2	Cytoplasm	other
-0.459	8.456	0.000596	1438344_at	D	LPPR5	lipid phosphate phosphatase-related protein type 5	Other	other
-0.457	7.732	0.000179	1457261_at		A930025H08Rik	RIKEN cDNA A930025H08 gene	Other	other
-0.456	10.823	6.68e-05	1440455_at		CAMK2N1	calcium/calmodulin-dependent protein kinase II inhibitor 1	Plasma Membrane	kinase
-0.456	8.087	8.83e-05	1455197_at		RND1	Rho family GTPase 1	Cytoplasm	enzyme
-0.456	8.59	0.00102	1418782_at		RXRG	retinoid X receptor, gamma	Nucleus	ligand-dependent nuclear receptor	etretinate, cytarabine/daunorubicin/tretinoin, idarubicin/mitoxantrone/tretinoin, arsenic trioxide/tretinoin, arsenic trioxide/daunorubicin/tretinoin, arsenic trioxide/gemtuzumab ozogamicin/tretinoin, daunorubicin/tretinoin, idarubicin/tretinoin, doxorubicin/tretinoin, arsenic trioxide/idarubicin/tretinoin, bexarotene, adapalene, acitretin, tretinoin, alitretinoin
-0.453	10.482	0.00134	1456051_at	D	DRD1	dopamine receptor D1	Plasma Membrane	G-protein coupled receptor	carbidopa/entacapone/levodopa, iloperidone, asenapine, rotigotine, acetophenazine, zuclopenthixol, pipothiazine, carbidopa/levodopa, chloropromazine, flupenthixol, chlorprothixene, trifluoperazine, fluphenazine, pimozide, clozapine, haloperidol, fenoldopam, fluoxetine/olanzapine, fluphenazine decanoate, thiothixene, amitriptyline/perphenazine, haloperidol decanoate, trimethobenzamide, fluphenazin…
-0.45	7.399	0.00157	1441778_at	D	ADCYAP1	adenylate cyclase activating polypeptide 1 (pituitary)	Extracellular Space	other
-0.45	10.012	0.00125	1424633_at		CAMK1G	calcium/calmodulin-dependent protein kinase IG	Cytoplasm	kinase
-0.449	11.891	0.000789	1428765_at	D	Meg3	maternally expressed 3	Other	other
-0.449	8.445	0.000969	1457361_at	D	ZNF804A	zinc finger protein 804A	Other	other
-0.447	8.878	0.000109	1456786_at	D	LDB2	LIM domain binding 2	Nucleus	transcription regulator
-0.446	5.144	3.55e-06	1437980_at		9130230N09Rik	RIKEN cDNA 9130230N09 gene	Other	other
-0.444	8.93	0.000277	1428484_at		OSBPL3	oxysterol binding protein-like 3	Cytoplasm	other
-0.442	11.938	3.45e-05	1438201_at	D	PDP1	pyruvate dehyrogenase phosphatase catalytic subunit 1	Cytoplasm	phosphatase
-0.441	7.874	0.000572	1429922_at		Gm13629	predicted gene 13629	Other	other
-0.441	9.804	0.000231	1456467_s_at	D	NLK	nemo-like kinase	Nucleus	kinase
-0.439	6.849	0.000513	1457570_at		A230001M10Rik	RIKEN cDNA A230001M10 gene	Other	other
-0.438	11.207	0.000356	1458534_at	D	RGS7BP	regulator of G-protein signaling 7 binding protein	Cytoplasm	other
-0.437	6.469	0.000404	1446981_at	D	KIAA1107	KIAA1107	Other	other
-0.436	13.788	1.71e-05	1460214_at		PCP4	Purkinje cell protein 4	Cytoplasm	other
-0.435	8.821	9.69e-05	1446624_at	D	FKTN	fukutin	Extracellular Space	other
-0.435	8.82	0.000364	1448117_at	D	KITLG	KIT ligand	Extracellular Space	growth factor
-0.434	7.087	0.00186	1416301_a_at		EBF1	early B-cell factor 1	Nucleus	transcription regulator
-0.434	8.616	0.00455	1427305_at		PIGA	phosphatidylinositol glycan anchor biosynthesis, class A	Cytoplasm	enzyme
-0.432	7.932	0.000775	1421530_a_at		GRM8	glutamate receptor, metabotropic 8	Plasma Membrane	G-protein coupled receptor	fasoracetam
-0.432	10.933	0.00587	1423477_at		ZIC1	Zic family member 1	Nucleus	transcription regulator
-0.43	10.462	4.66e-06	1460626_at		SEPT11	septin 11	Nucleus	other
-0.427	6.068	0.00298	1445854_at		C230004F18Rik	RIKEN cDNA C230004F18 gene	Other	other
-0.426	6.865	0.000655	1442791_x_at		6720407P12Rik	RIKEN cDNA 6720407P12 gene	Other	other
-0.426	10.679	0.000131	1420403_at	D	ATP2B2	ATPase, Ca++ transporting, plasma membrane 2	Plasma Membrane	transporter
-0.426	7.921	0.00282	1438050_x_at		Gm9222	predicted gene 9222	Other	other
-0.425	8.608	0.00013	1420580_at		4930429B21Rik	RIKEN cDNA 4930429B21 gene	Other	other
-0.425	8.001	0.00395	1437544_at	D	FUBP1	far upstream element (FUSE) binding protein 1	Nucleus	transcription regulator
-0.423	8.03	0.00131	1453334_at		B230216N24Rik	RIKEN cDNA B230216N24 gene	Other	other
-0.42	7.292	0.0039	1437950_at		FAM149A	family with sequence similarity 149, member A	Other	other
-0.42	9.512	0.00161	1437319_at	D	UNC13C	unc-13 homolog C (C. elegans)	Cytoplasm	other
-0.418	6.183	0.00509	1430996_at		ETNK1	ethanolamine kinase 1	Cytoplasm	kinase
-0.418	9.79	0.00032	1434055_at		GALNT9	polypeptide N-acetylgalactosaminyltransferase 9	Cytoplasm	enzyme
-0.418	8.002	0.00173	1427685_a_at		SYNJ2	synaptojanin 2	Cytoplasm	phosphatase
-0.416	9.212	0.00309	1434779_at		CBLN2	cerebellin 2 precursor	Extracellular Space	other
-0.416	10.002	0.000317	1457092_at		FAM19A1	family with sequence similarity 19 (chemokine (C-C motif)-like), member A1	Extracellular Space	other
-0.416	6.755	0.00125	1455277_at		HHIP	hedgehog interacting protein	Plasma Membrane	other
-0.415	11.023	0.000576	1428535_at	D	KIAA1462	KIAA1462	Plasma Membrane	other
-0.414	8.697	0.000982	1420909_at		VEGFA	vascular endothelial growth factor A	Extracellular Space	growth factor	dalteparin, bevacizumab, ranibizumab, aflibercept, bevacizumab/erlotinib, bevacizumab/sorafenib, bevacizumab/5-fluorouracil, bevacizumab/temozolomide, bevacizumab/irinotecan, bevacizumab/carmustine/lomustine, bevacizumab/paclitaxel, bevacizumab/irinotecan/oxaliplatin, aflibercept/irinotecan, bevacizumab/capecitabine/oxaliplatin, bevacizumab/panitumumab, bevacizumab/cetuximab, bevacizumab/pemetrex…
-0.413	8.52	0.000772	1440071_at		MAGI1	membrane associated guanylate kinase, WW and PDZ domain containing 1	Plasma Membrane	kinase
-0.413	9.561	0.00139	1451630_at	D	TTL	tubulin tyrosine ligase	Cytoplasm	enzyme
-0.412	8.342	3.39e-05	1448327_at		ACTN2	actinin, alpha 2	Nucleus	transcription regulator
-0.412	7.176	0.0045	1444432_at		D330040H18Rik	RIKEN cDNA D330040H18 gene	Other	other
-0.412	10.405	4.46e-05	1426371_at	D	FAR1	fatty acyl CoA reductase 1	Cytoplasm	enzyme
-0.412	9.284	0.00401	1455011_at	D	STARD4	StAR-related lipid transfer (START) domain containing 4	Cytoplasm	transporter
-0.409	8.237	9.21e-05	1457015_at		A230070E04Rik	RIKEN cDNA A230070E04 gene	Other	other
-0.408	7.642	0.00025	1445380_at		A230072C01Rik	RIKEN cDNA A230072C01 gene	Other	other
-0.408	9.172	0.0013	1435512_at		CCDC184	coiled-coil domain containing 184	Cytoplasm	other
-0.408	8.303	0.00206	1421926_at		MAPK11	mitogen-activated protein kinase 11	Cytoplasm	kinase	talmapimod, regorafenib
-0.408	10.009	0.000302	1453059_at		MLIP	muscular LMNA-interacting protein	Nucleus	other
-0.407	9.351	0.00433	1457142_at	D	NECAB1	N-terminal EF-hand calcium binding protein 1	Cytoplasm	other
-0.404	9.255	0.00102	1456614_at		ACN9	ACN9 homolog (S. cerevisiae)	Cytoplasm	other
-0.403	9.788	0.00399	1432211_a_at	D	FBXO9	F-box protein 9	Cytoplasm	enzyme
-0.403	10.287	1.92e-05	1449286_at		NTNG1	netrin G1	Extracellular Space	other
-0.403	10.214	7.16e-06	1453060_at		RGS8	regulator of G-protein signaling 8	Cytoplasm	other
-0.402	7.693	0.00275	1456045_at		CAMKMT	calmodulin-lysine N-methyltransferase	Other	other
-0.401	9.477	0.00436	1448673_at		PVRL3	poliovirus receptor-related 3	Plasma Membrane	other
-0.4	7.719	0.00314	1422871_at		KCNJ12	potassium inwardly-rectifying channel, subfamily J, member 12	Plasma Membrane	ion channel	nicorandil, amiodarone, dofetilide
-0.4	7.211	0.00185	1419021_at		MCF2	MCF.2 cell line derived transforming sequence	Cytoplasm	other
-0.4	8.807	0.00185	1427544_a_at		PAPOLA	poly(A) polymerase alpha	Nucleus	enzyme
-0.399	8.8	2.29e-05	1436133_at		CCDC127	coiled-coil domain containing 127	Other	other
-0.398	8.984	0.00036	1455108_at	D	EIF4E2	eukaryotic translation initiation factor 4E family member 2	Cytoplasm	translation regulator
-0.398	8.953	0.00407	1427484_at		EML5	echinoderm microtubule associated protein like 5	Cytoplasm	other
-0.396	7.502	0.000264	1419032_at	D	MST4	serine/threonine protein kinase MST4	Nucleus	kinase
-0.396	8.619	1.51e-05	1417577_at		TRPC3	transient receptor potential cation channel, subfamily C, member 3	Plasma Membrane	ion channel
-0.395	8.339	0.000275	1455760_at		SLC9A5	solute carrier family 9, subfamily A (NHE5, cation proton antiporter 5), member 5	Plasma Membrane	transporter
-0.394	9.277	0.00369	1457867_at		SGPP2	sphingosine-1-phosphate phosphatase 2	Cytoplasm	phosphatase
-0.393	11.844	0.000191	1451280_at	D	ARPP21	cAMP-regulated phosphoprotein, 21kDa	Cytoplasm	other
-0.393	7.028	0.00151	1443262_at		MRPS14	mitochondrial ribosomal protein S14	Cytoplasm	other
-0.392	9.511	0.00248	1441369_at		C030017B01Rik	RIKEN cDNA C030017B01 gene	Other	other
-0.392	7.468	0.000737	1438470_at		SOCS2	suppressor of cytokine signaling 2	Cytoplasm	other
-0.392	10.082	0.000259	1429131_at	D	UBE2V2	ubiquitin-conjugating enzyme E2 variant 2	Cytoplasm	enzyme
-0.391	12.648	5.58e-05	1422609_at		ARPP19	cAMP-regulated phosphoprotein, 19kDa	Cytoplasm	transporter
-0.391	8.517	0.00347	1428485_at		CA12	carbonic anhydrase XII	Plasma Membrane	enzyme	methazolamide, hydrochlorothiazide, acetazolamide, trichloromethiazide, chlorothiazide, chlorthalidone, benzthiazide, sulfacetamide, topiramate
-0.391	8.429	0.00598	1460200_s_at	D	LZTFL1	leucine zipper transcription factor-like 1	Cytoplasm	other
-0.39	7.239	0.0055	1438799_at		Dlx6os1	distal-less homeobox 6, opposite strand 1	Nucleus	other
-0.389	9.888	0.000797	1448507_at		EFHD1	EF-hand domain family, member D1	Cytoplasm	other
-0.388	8.145	0.00255	1429689_at		4932433N03Rik	RIKEN cDNA 4932433N03 gene	Other	other
-0.387	9.756	0.00181	1435424_x_at		SHISA9	shisa family member 9	Plasma Membrane	other
-0.387	10.066	8.91e-05	1427104_at	D	ZNF23	zinc finger protein 23	Nucleus	other
-0.384	9.566	0.00111	1438756_at		ANKRD29	ankyrin repeat domain 29	Other	other
-0.384	7.837	0.0034	1455426_at	D	EPHA3	EPH receptor A3	Plasma Membrane	kinase
-0.383	7.549	0.00386	1425362_at		AGFG2	ArfGAP with FG repeats 2	Other	other
-0.383	7.633	0.00149	1436116_x_at	D	APPL1	adaptor protein, phosphotyrosine interaction, PH domain and leucine zipper containing 1	Cytoplasm	other
-0.383	7.231	0.00327	1455889_at		FAR2	fatty acyl CoA reductase 2	Cytoplasm	enzyme
-0.383	8.874	0.000188	1438714_at	D	ZNF207	zinc finger protein 207	Nucleus	transcription regulator
-0.382	8.528	0.000737	1435245_at		GLS2	glutaminase 2 (liver, mitochondrial)	Cytoplasm	enzyme
-0.382	7.632	0.000123	1422936_at		MAS1	MAS1 oncogene	Plasma Membrane	G-protein coupled receptor
-0.382	7.853	7.39e-05	1439131_at		TXLNG	taxilin gamma	Nucleus	other
-0.38	9.754	0.00572	1444058_at	D	DZIP3	DAZ interacting zinc finger protein 3	Cytoplasm	enzyme
-0.38	8.266	0.0023	1447854_s_at	D	HIST1H2BJ	histone cluster 1, H2bj	Nucleus	other
-0.38	9.517	1.58e-05	1434243_s_at		TOMM70A	translocase of outer mitochondrial membrane 70 homolog A (S. cerevisiae)	Cytoplasm	transporter
-0.38	8.149	0.00025	1458163_at	D	Zfp941	zinc finger protein 941	Other	other
-0.379	8.215	0.00171	1454769_at		TATDN2	TatD DNase domain containing 2	Nucleus	other
-0.378	7.582	8.43e-05	1427676_a_at		GRIK1	glutamate receptor, ionotropic, kainate 1	Plasma Membrane	ion channel	phentermine/topiramate, topiramate
-0.378	9.081	0.000345	1456130_at		THSD7A	thrombospondin, type I, domain containing 7A	Other	other
-0.378	7.977	0.00205	1418424_at		TNFAIP6	tumor necrosis factor, alpha-induced protein 6	Extracellular Space	other
-0.377	6.935	0.00255	1459250_at		TSHZ2	teashirt zinc finger homeobox 2	Other	other
-0.376	9.225	0.000512	1447977_x_at		ZNF442	zinc finger protein 442	Nucleus	other
-0.375	7.473	0.00402	1427063_at		KIAA1324	KIAA1324	Plasma Membrane	other
-0.374	7.4	0.00588	1440992_at		3110052M02Rik	RIKEN cDNA 3110052M02 gene	Other	other
-0.374	9.764	0.00362	1443824_s_at		CA7	carbonic anhydrase VII	Cytoplasm	enzyme	ethoxyzolamide, dichlorphenamide, methazolamide, hydrochlorothiazide, acetazolamide, trichloromethiazide, chlorothiazide, chlorthalidone, benzthiazide, sulfacetamide, topiramate
-0.374	9.883	0.00121	1418585_at		CCNH	cyclin H	Nucleus	transcription regulator
-0.374	9.745	0.000673	1449961_at	D	RPH3A	rabphilin 3A homolog (mouse)	Plasma Membrane	transporter
-0.373	8.933	0.00313	1451382_at		CHAC1	ChaC, cation transport regulator homolog 1 (E. coli)	Cytoplasm	other
-0.373	9.608	0.00281	1447979_at	D	SGSM1	small G protein signaling modulator 1	Nucleus	other
-0.373	11.226	0.000105	1437614_x_at	D	ZDHHC14	zinc finger, DHHC-type containing 14	Cytoplasm	enzyme
-0.372	7.635	0.00115	1429232_at		HNRNPR	heterogeneous nuclear ribonucleoprotein R	Nucleus	other
-0.372	10.594	0.000135	1437069_at		OSBPL8	oxysterol binding protein-like 8	Plasma Membrane	other
-0.372	8.633	0.00189	1457156_at		TRHDE	thyrotropin-releasing hormone degrading enzyme	Plasma Membrane	peptidase
-0.371	9.723	0.00228	1447807_s_at	D	PLEKHH1	pleckstrin homology domain containing, family H (with MyTH4 domain) member 1	Cytoplasm	other
-0.37	9.638	0.00446	1450646_at		CYP51A1	cytochrome P450, family 51, subfamily A, polypeptide 1	Cytoplasm	enzyme	itraconazole
-0.369	7.021	0.000387	1421353_at		PDE7B	phosphodiesterase 7B	Cytoplasm	enzyme	dyphylline, nitroglycerin, aminophylline, anagrelide, milrinone, dipyridamole, ketotifen, tolbutamide, theophylline, pentoxifylline
-0.368	10.097	0.000657	1434932_at		ADARB1	adenosine deaminase, RNA-specific, B1	Nucleus	enzyme
-0.368	11.807	0.000842	1434671_at		B230337E12Rik	RIKEN cDNA B230337E12 gene	Other	other
-0.368	9.805	0.00133	1452090_a_at	D	OLFM3	olfactomedin 3	Cytoplasm	other
-0.367	9.337	0.00581	1436597_at	D	ANKHD1/ANKHD1-EIF4EBP3	ankyrin repeat and KH domain containing 1	Other	other
-0.367	8.006	6.49e-06	1426167_a_at		CAMK4	calcium/calmodulin-dependent protein kinase IV	Nucleus	kinase
-0.367	9.734	0.000666	1447640_s_at	D	PBX3	pre-B-cell leukemia homeobox 3	Nucleus	transcription regulator
-0.366	10.671	0.000372	1438664_at	D	PRKAR2B	protein kinase, cAMP-dependent, regulatory, type II, beta	Cytoplasm	kinase
-0.366	6.305	0.000608	1457347_at		RYR1	ryanodine receptor 1 (skeletal)	Cytoplasm	ion channel	dantrolene
-0.365	8.189	0.000473	1452335_at		MFSD8	major facilitator superfamily domain containing 8	Nucleus	other
-0.365	9.497	0.00149	1435875_at	D	PRKAB2	protein kinase, AMP-activated, beta 2 non-catalytic subunit	Cytoplasm	kinase
-0.365	9.416	0.00014	1428170_at		ZNF180	zinc finger protein 180	Nucleus	transcription regulator
-0.364	8.531	0.00209	1450005_x_at	D	DLK2	delta-like 2 homolog (Drosophila)	Extracellular Space	other
-0.363	9.904	0.000353	1442226_at	D	SEMA3E	sema domain, immunoglobulin domain (Ig), short basic domain, secreted, (semaphorin) 3E	Extracellular Space	other
-0.363	8.177	0.00515	1449122_at	D	UBXN2B	UBX domain protein 2B	Other	other
-0.362	11.302	0.000244	1439808_at		IPCEF1	interaction protein for cytohesin exchange factors 1	Cytoplasm	enzyme
-0.362	9.626	0.000272	1454043_a_at	D	KCNAB1	potassium voltage-gated channel, shaker-related subfamily, beta member 1	Plasma Membrane	ion channel
-0.361	8.723	0.00364	1421328_at		MAP2	microtubule-associated protein 2	Plasma Membrane	other	estramustine
-0.361	10.433	0.00209	1423044_at	D	PROSC	proline synthetase co-transcribed homolog (bacterial)	Cytoplasm	enzyme
-0.361	8.204	0.00127	1436891_at	D	USP15	ubiquitin specific peptidase 15	Cytoplasm	peptidase
-0.36	11.836	5.38e-05	1435667_at	D	RIMS1	regulating synaptic membrane exocytosis 1	Plasma Membrane	other
-0.36	7.594	3.28e-05	1457704_at	D	ZNF385B	zinc finger protein 385B	Nucleus	other
-0.359	10.417	0.000688	1455701_at		ARHGAP33	Rho GTPase activating protein 33	Plasma Membrane	transporter
-0.359	10.204	0.00225	1450871_a_at		BCAT1	branched chain amino-acid transaminase 1, cytosolic	Cytoplasm	enzyme
-0.359	9.136	0.000118	1439899_at	D	GALNT13	polypeptide N-acetylgalactosaminyltransferase 13	Cytoplasm	enzyme
-0.359	9.018	0.00198	1427427_at		RYR3	ryanodine receptor 3	Plasma Membrane	ion channel
-0.359	10.261	0.000463	1434553_at		TMEM56	transmembrane protein 56	Other	other
-0.358	7.699	0.000496	1438718_at	D	FGF9	fibroblast growth factor 9	Extracellular Space	growth factor
-0.358	10.929	0.00378	1419137_at		SHANK3	SH3 and multiple ankyrin repeat domains 3	Plasma Membrane	other
-0.357	8.896	0.00154	1444395_at		DIXDC1	DIX domain containing 1	Cytoplasm	other
-0.356	7.478	0.00382	1455632_at	D	GNB5	guanine nucleotide binding protein (G protein), beta 5	Plasma Membrane	enzyme
-0.356	8.439	0.0012	1429087_at		INIP	INTS3 and NABP interacting protein	Nucleus	other
-0.356	11.107	0.00112	1422834_at	D	KCND2	potassium voltage-gated channel, Shal-related subfamily, member 2	Plasma Membrane	ion channel	dalfampridine
-0.356	8.504	0.00544	1457030_at		Mirg	miRNA containing gene	Other	other
-0.355	8.692	0.000233	1430348_at		2900019E01Rik	RIKEN cDNA 2900019E01 gene	Other	other
-0.355	11.065	0.000182	1452089_at	D	CACNB4	calcium channel, voltage-dependent, beta 4 subunit	Plasma Membrane	ion channel	verapamil, mibefradil, nimodipine, trandolapril/verapamil
-0.355	7.851	0.00192	1421342_at	D	KCNS2	potassium voltage-gated channel, delayed-rectifier, subfamily S, member 2	Plasma Membrane	ion channel
-0.355	8.206	0.000324	1439312_at		LOC102638038	uncharacterized LOC102638038	Other	other
-0.355	7.331	0.00447	1459269_at		SDR39U1	short chain dehydrogenase/reductase family 39U, member 1	Nucleus	other
-0.355	11.385	0.00333	1428379_at		SLC17A6	solute carrier family 17 (vesicular glutamate transporter), member 6	Plasma Membrane	transporter
-0.355	9.745	8.08e-05	1437472_at		UNC13A	unc-13 homolog A (C. elegans)	Plasma Membrane	other
-0.354	9.195	0.000179	1430038_at	D	GPHN	gephyrin	Plasma Membrane	enzyme
-0.354	10.029	3.63e-05	1440545_at	D	GRM1	glutamate receptor, metabotropic 1	Plasma Membrane	G-protein coupled receptor	fasoracetam
-0.354	9.582	0.000631	1422742_at		HIVEP1	human immunodeficiency virus type I enhancer binding protein 1	Nucleus	transcription regulator
-0.354	7.506	0.00571	1430032_at		RBM4B	RNA binding motif protein 4B	Nucleus	other
-0.354	8.475	0.00286	1457323_at		SMCO3	single-pass membrane protein with coiled-coil domains 3	Other	other
-0.354	8.355	0.00021	1451819_at	D	ZSWIM6	zinc finger, SWIM-type containing 6	Other	other
-0.353	10.182	0.00465	1455190_at		GNG7	guanine nucleotide binding protein (G protein), gamma 7	Plasma Membrane	enzyme
-0.352	9.095	0.00189	1440886_at		CDC37L1	cell division cycle 37-like 1	Cytoplasm	other
-0.352	8.26	0.000154	1427285_s_at		MALAT1	metastasis associated lung adenocarcinoma transcript 1 (non-protein coding)	Nucleus	other
-0.352	9.561	0.000133	1427114_at		TTC19	tetratricopeptide repeat domain 19	Cytoplasm	other
-0.351	8.337	0.00178	1425573_a_at	D	ASAP1	ArfGAP with SH3 domain, ankyrin repeat and PH domain 1	Plasma Membrane	other
-0.351	11.379	0.000176	1434339_at		Fnbp1l	formin binding protein 1-like	Cytoplasm	other
-0.351	8.957	0.00208	1416658_at		FRZB	frizzled-related protein	Extracellular Space	other
-0.351	9.401	0.000516	1436013_at		GSG1L	GSG1-like	Plasma Membrane	other
-0.349	8.976	0.000476	1442016_at		MRPL48	mitochondrial ribosomal protein L48	Cytoplasm	other
-0.348	6.453	0.00105	1453245_at		9130024F11Rik	RIKEN cDNA 9130024F11 gene	Other	other
-0.348	9.597	0.00105	1454742_at		RASGEF1B	RasGEF domain family, member 1B	Other	other
-0.348	9.306	0.00164	1427086_at		SLIT3	slit homolog 3 (Drosophila)	Extracellular Space	other
-0.347	9.897	0.00166	1419200_at		FXYD7	FXYD domain containing ion transport regulator 7	Plasma Membrane	ion channel
-0.347	9.054	0.00359	1438450_at	D	LIN7A	lin-7 homolog A (C. elegans)	Plasma Membrane	other
-0.347	7.676	0.00165	1428345_at		PPAPDC2	phosphatidic acid phosphatase type 2 domain containing 2	Other	phosphatase
-0.347	6.943	0.00533	1433947_at		RAB37	RAB37, member RAS oncogene family	Cytoplasm	enzyme
-0.347	9.522	4.85e-05	1452174_at	D	SREBF2	sterol regulatory element binding transcription factor 2	Nucleus	transcription regulator
-0.346	8.196	0.000136	1425698_a_at		CREBZF	CREB/ATF bZIP transcription factor	Nucleus	transcription regulator
-0.346	7.893	0.00507	1455179_at	D	MPP7	membrane protein, palmitoylated 7 (MAGUK p55 subfamily member 7)	Plasma Membrane	other
[truncated: 971 more rows]
