# Supplementary material for: Sex Differences in Gene and Protein Expression After Intracerebral Hemorrhage in Mice
Source: Springer Nature journal article supplement (doi:10.1007/s12975-018-0633-z), 2018-05-13
Supplement: MOESM4 [file 15760260]

## Sheet: MBSFBS
Log Ratio	Intensity/RPKM/FPKM	p-value	ID	Notes	Symbol	Entrez Gene Name	Location	Type(s)	Drug(s)
-4.381	10.271	9.46e-15	1436936_s_at		XIST	X inactive specific transcript (non-protein coding)	Nucleus	other
-1.111	7.698	3.16e-05	1449824_at		Prg4	proteoglycan 4 (megakaryocyte stimulating factor, articular superficial zone protein)	Extracellular Space	other
-0.958	5.978	7.87e-05	1436279_at		SLC26A7	solute carrier family 26 (anion exchanger), member 7	Plasma Membrane	transporter
-0.816	7.286	7.33e-05	1449184_at		PGLYRP1	peptidoglycan recognition protein 1	Plasma Membrane	transmembrane receptor
-0.701	8.922	4.58e-05	1418450_at		ISLR	immunoglobulin superfamily containing leucine-rich repeat	Extracellular Space	other
-0.693	8.076	2.41e-07	1421895_at	D	EIF2S3	eukaryotic translation initiation factor 2, subunit 3 gamma, 52kDa	Cytoplasm	translation regulator
-0.655	10.376	4.56e-06	1423152_at		VAPB	VAMP (vesicle-associated membrane protein)-associated protein B and C	Plasma Membrane	other
-0.633	8.197	7.26e-05	1423271_at		GJB2	gap junction protein, beta 2, 26kDa	Plasma Membrane	transporter
-0.546	7.253	1.43e-05	1436347_a_at	D	5530601H04Rik	RIKEN cDNA 5530601H04 gene	Other	other
-0.521	8.423	5.13e-05	1448529_at		THBD	thrombomodulin	Plasma Membrane	transmembrane receptor
-0.435	8.531	0.000121	1452827_at		LINC00634	long intergenic non-protein coding RNA 634	Other	other
-0.423	8.476	0.000107	1419091_a_at		ANXA2	annexin A2	Plasma Membrane	other
-0.37	9.289	4.2e-05	1448754_at		RBP1	retinol binding protein 1, cellular	Extracellular Space	transporter
-0.347	8.959	0.000164	1455108_at		EIF4E2	eukaryotic translation initiation factor 4E family member 2	Cytoplasm	translation regulator
-0.343	9.069	9.14e-05	1427235_at		KDM6A	lysine (K)-specific demethylase 6A	Nucleus	other
-0.333	11.723	3.98e-05	1423423_at		PDIA3	protein disulfide isomerase family A, member 3	Cytoplasm	peptidase
-0.32	8.196	0.000139	1454769_at		TATDN2	TatD DNase domain containing 2	Nucleus	other
-0.318	7.968	4.46e-05	1435529_at		IFIT1	interferon-induced protein with tetratricopeptide repeats 1	Cytoplasm	other
-0.307	10.138	9.87e-05	1449368_at		DCN	decorin	Extracellular Space	other
-0.304	6.633	2.54e-05	1417104_at		EMP3	epithelial membrane protein 3	Plasma Membrane	other
-0.303	9.356	0.000145	1417921_at		PBDC1	polysaccharide biosynthesis domain containing 1	Other	other
-0.3	10.686	2.71e-05	1416467_at	D	DDX3X	DEAD (Asp-Glu-Ala-Asp) box helicase 3, X-linked	Cytoplasm	enzyme
-0.297	9.414	7.79e-05	1427020_at		SCARA3	scavenger receptor class A, member 3	Plasma Membrane	transmembrane receptor
-0.296	8.34	9.4e-05	1450243_a_at		RCAN2	regulator of calcineurin 2	Other	other
-0.292	9.015	0.000129	1449682_s_at		TUBB2B	tubulin, beta 2B class IIb	Cytoplasm	other	brentuximab vedotin, cabazitaxel
-0.285	8.355	8.46e-05	1426336_at		CACNG7	calcium channel, voltage-dependent, gamma subunit 7	Plasma Membrane	ion channel
-0.274	6.513	9.74e-05	1428021_at		MCCC2	methylcrotonoyl-CoA carboxylase 2 (beta)	Cytoplasm	enzyme
-0.265	9.327	0.000104	1444157_a_at		KDM5C	lysine (K)-specific demethylase 5C	Nucleus	other
-0.265	9.673	7.82e-05	1425826_a_at		SORBS1	sorbin and SH3 domain containing 1	Plasma Membrane	other
-0.26	8.319	0.000102	1417013_at		HSPB8	heat shock 22kDa protein 8	Cytoplasm	kinase
-0.244	10.274	0.000129	1435367_at		MAPK4	mitogen-activated protein kinase 4	Cytoplasm	kinase
-0.244	7.06	0.000124	1435452_at		SLC35G1	solute carrier family 35, member G1	Plasma Membrane	other
-0.221	7.958	0.000159	1418520_at		Tgoln1	trans-golgi network protein	Cytoplasm	other
-0.194	9.643	0.000123	1449111_a_at		GRB2	growth factor receptor-bound protein 2	Cytoplasm	other
-0.188	9.301	5.52e-05	1435213_at		NHLRC1	NHL repeat containing E3 ubiquitin protein ligase 1	Cytoplasm	enzyme
-0.186	8.79	8.88e-05	1448332_at		PEX19	peroxisomal biogenesis factor 19	Cytoplasm	other
-0.174	7.659	6.12e-05	1454700_at		LRFN4	leucine rich repeat and fibronectin type III domain containing 4	Other	other
0.228	9.402	0.000113	1435257_at		KLHL17	kelch-like family member 17	Cytoplasm	other
0.252	5.376	0.000135	1416740_at		COL5A1	collagen, type V, alpha 1	Extracellular Space	other	collagenase clostridium histolyticum
0.269	7.96	1.32e-05	1437439_at		C5orf42	chromosome 5 open reading frame 42	Other	other
0.273	7.603	4.5e-05	1455016_at		PRPF38B	pre-mRNA processing factor 38B	Other	other
0.287	9.526	7.37e-05	1424238_at		SIRT7	sirtuin 7	Nucleus	enzyme
0.3	7.871	7.15e-05	1438215_at		SRSF3	serine/arginine-rich splicing factor 3	Nucleus	other
0.321	8.482	3.98e-05	1440097_at		Mirg	miRNA containing gene	Other	other
0.324	7.502	7.53e-05	1441992_at		RAB14	RAB14, member RAS oncogene family	Cytoplasm	enzyme
0.335	6.397	4.13e-05	1440611_at		FAXC	failed axon connections homolog (Drosophila)	Other	other
0.341	13.218	0.00014	1418188_a_at	D	MALAT1	metastasis associated lung adenocarcinoma transcript 1 (non-protein coding)	Nucleus	other
0.345	8.449	0.000122	1425067_at		CELSR3	cadherin, EGF LAG seven-pass G-type receptor 3	Plasma Membrane	G-protein coupled receptor
0.352	8.692	1.58e-05	1429882_at		2610005L07Rik	cadherin 11 pseudogene	Other	other
0.385	8.234	0.000109	1435744_at		Firre	functional intergenic repeating RNA element	Other	other
0.39	6.083	0.000144	1440854_at	D	KIAA0907	KIAA0907	Other	other
0.405	8.102	0.0001	1446144_at		PEX5L	peroxisomal biogenesis factor 5-like	Cytoplasm	ion channel
0.412	9.801	9.98e-05	1454735_at		ODF2	outer dense fiber of sperm tails 2	Cytoplasm	other
0.418	7.506	0.000101	1452350_at		BRD8	bromodomain containing 8	Nucleus	transcription regulator
0.42	9.235	1.8e-05	1456386_at		RBM39	RNA binding motif protein 39	Nucleus	transcription regulator
0.433	7.96	7.34e-05	1440619_at		MAPK8IP1	mitogen-activated protein kinase 8 interacting protein 1	Cytoplasm	other
0.502	8.369	6.59e-05	1438249_at		USP7	ubiquitin specific peptidase 7 (herpes virus-associated)	Nucleus	peptidase
0.521	12.343	1.42e-05	1438403_s_at		RAMP2	receptor (G protein-coupled) activity modifying protein 2	Plasma Membrane	transporter	pramlintide
0.527	9.464	0.000148	1429009_at		SNRNP70	small nuclear ribonucleoprotein 70kDa (U1)	Nucleus	other
0.539	6.853	0.000123	1442108_at		RNF25	ring finger protein 25	Nucleus	transcription regulator
0.638	7.851	7.71e-05	1437638_at		Srrm2	serine/arginine repetitive matrix 2	Nucleus	other
0.688	11.965	9.76e-05	1452183_a_at	D	Meg3	maternally expressed 3	Other	other
0.705	10.826	8.58e-05	1460121_at		9630010G10Rik	RIKEN cDNA 9630010G10 gene	Other	other
0.318	6.573	0.000117	1458920_at
0.418	7.62	0.000119	1446421_at

## Sheet: M2hF2h
Log Ratio	Intensity/RPKM/FPKM	p-value	ID	Notes	Symbol	Entrez Gene Name	Location	Type(s)	Drug(s)
-4.468	10.022	4.31e-08	1436936_s_at		XIST	X inactive specific transcript (non-protein coding)	Nucleus	other

## Sheet: M6hF6h
Log Ratio	Intensity/RPKM/FPKM	p-value	ID	Notes	Symbol	Entrez Gene Name	Location	Type(s)	Drug(s)
-4.79	10.086	1.2e-13	1436936_s_at		XIST	X inactive specific transcript (non-protein coding)	Nucleus	other
-0.827	9.461	9.13e-07	1423530_at		STK32C	serine/threonine kinase 32C	Other	kinase
-0.535	11.892	4.42e-06	1451090_a_at	D	EIF2S3	eukaryotic translation initiation factor 2, subunit 3 gamma, 52kDa	Cytoplasm	translation regulator
1.045	10.098	6.58e-08	1439122_at		DDX6	DEAD (Asp-Glu-Ala-Asp) box helicase 6	Nucleus	enzyme

## Sheet: M24hF24h
Log Ratio	Intensity/RPKM/FPKM	p-value	ID	Notes	Symbol	Entrez Gene Name	Location	Type(s)	Drug(s)
-4.456	9.538	4.97e-10	1436936_s_at		XIST	X inactive specific transcript (non-protein coding)	Nucleus	other

## Sheet: Sheet2
Log Ratio	Intensity/RPKM/FPKM	p-value	ID	Notes	Symbol	Entrez Gene Name	Location	Type(s)	Drug(s)
-4.417	10.021	6.34e-10	1436936_s_at		XIST	X inactive specific transcript (non-protein coding)	Nucleus	other
